# Supplementary material for: Stage-specific control of oligodendrocyte survival and morphogenesis by TDP-43
Source: eLife. 2022 Mar 21;11:e75230. doi: 10.7554/eLife.75230 (PMC8970587; doi:10.7554/eLife.75230)
Supplement: Supplementary file 1. — Excel file of bulk RNA-Seq that includes average FPKM of each gene, log fold change (FC), p value, and false discovery rate (FDR) for the following comparisons: (1) Mog-TDP43-WT vs. Mobp-TDP43-WT, (2) Mog-TDP43-KO vs. Mobp-TDP43-KO, (3). Mog-TDP43-KO vs. Mog-TDP43-WT, (4) Mobp-TDP43-KO vs. Mobp-TDP43-WT, and (5) TDP43-WT vs. TDP43-KO. [file elife-75230-supp1.xlsx]

## Sheet: Sheet 1
gene	external_gene_name	ensembl_gene_id	entrezgene	chromosome_name	description	Rank	avg_fpkm...1.	logFC_Mog-TDP43-WT_vs_Mobp-TDP43-WT	logFC_Mog-TDP43-KO_vs_Mobp-TDP43-KO	logFC_Mog-TDP43-KO_vs_Mog-TDP43-WT	logFC_Mobp-TDP43-KO_vs_Mobp-TDP43-WT	logFC_TDP43-WT_vs_TDP43-KO	PValue_Mog-TDP43-WT_vs_Mobp-TDP43-WT	PValue_Mog-TDP43-KO_vs_Mobp-TDP43-KO	PValue_Mog-TDP43-KO_vs_Mog-TDP43-WT	PValue_Mobp-TDP43-KO_vs_Mobp-TDP43-WT	PValue_TDP43-WT_vs_TDP43-KO	FDR_Mog-TDP43-WT_vs_Mobp-TDP43-WT	FDR_Mog-TDP43-KO_vs_Mobp-TDP43-KO	FDR_Mog-TDP43-KO_vs_Mog-TDP43-WT	FDR_Mobp-TDP43-KO_vs_Mobp-TDP43-WT	FDR_TDP43-WT_vs_TDP43-KO
1190007I07Rik	1190007I07Rik	ENSMUSG00000063320	544717	10	RIKEN cDNA 1190007I07 gene [Source:MGI Symbol;Acc:MGI:3698433]	10097	31.0704	9.44349	4.41979	-5.60683	-0.58313	6.18996	2.45991e-08	0.00767804	2.83262e-05	0.77306	0.0467313	3.93154e-07	0.0342457	0.000615631	0.905534	0.234773
B230216N24Rik	B230216N24Rik	ENSMUSG00000089706		1	RIKEN cDNA B230216N24 gene [Source:MGI Symbol;Acc:MGI:1925853]	9418	25.907	8.99465	4.06106	-5.20492	-0.271323	5.47624	3.30207e-10	0.00142976	7.19233e-06	0.853189	0.00450789	8.13024e-09	0.00947235	0.000200578	0.940027	0.0522036
Slc35d2	Slc35d2	ENSMUSG00000033114	70484	13	solute carrier family 35, member D2 [Source:MGI Symbol;Acc:MGI:1917734]	7882	18.026	8.97098	3.03201	-5.48764	0.451335	5.0363	3.05291e-22	8.1924e-05	6.06117e-13	0.612883	1.53244e-05	5.5624e-20	0.000945716	1.65652e-10	0.830867	0.000702992
Gm20337	Gm20337					8638	28.6899	8.83494	2.71396	-5.9593	0.161681	5.79762	1.16638e-08	0.0288752	8.84619e-06	0.901169	0.00138337	2.03306e-07	0.0930065	0.000236446	0.959913	0.0226054
Zfp219	Zfp219	ENSMUSG00000049295	69890	14	zinc finger protein 219 [Source:MGI Symbol;Acc:MGI:1917140]	9293	11.505	8.78892	1.2397	-5.74691	1.8023	3.94461	9.73977e-12	0.207509	1.21284e-07	0.118732	0.0143326	3.24619e-10	0.377515	6.25414e-06	0.364395	0.112913
Pex11a	Pex11a	ENSMUSG00000030545	18631	7	peroxisomal biogenesis factor 11 alpha [Source:MGI Symbol;Acc:MGI:1338788]	9529	33.6056	8.76555	8.06131	-2.97387	-2.26964	5.24351	1.11325e-06	2.22001e-05	0.0266576	0.243759	0.0293739	1.21822e-05	0.000328406	0.111852	0.536932	0.177118
Mr1	Mr1	ENSMUSG00000026471	15064	1	major histocompatibility complex, class I-related [Source:MGI Symbol;Acc:MGI:1195463]	6067	19.3284	8.54492	5.67527	-5.68025	-2.8106	8.49084	8.20039e-19	4.93171e-09	1.20582e-11	0.00480195	1.18833e-11	9.14762e-17	2.0816e-07	2.16098e-09	0.0504758	2.76402e-09
Zfp647	Zfp647	ENSMUSG00000054967	239546	15	zinc finger protein 647 [Source:MGI Symbol;Acc:MGI:3052806]	5877	23.5079	8.52021	1.23933	-5.88924	1.39164	4.49759	1.53819e-24	0.0483693	7.0372e-16	0.0393762	1.50054e-06	3.36311e-22	0.137591	3.34481e-13	0.191742	0.000101887
Ralgps2	Ralgps2	ENSMUSG00000026594	78255	1	Ral GEF with PH domain and SH3 binding motif 2 [Source:MGI Symbol;Acc:MGI:1925505]	9206	4.52417	8.32018	5.87888	-3.16466	-0.723361	3.88802	1.21527e-06	0.000206775	0.01707	0.63132	0.0536523	1.31538e-05	0.00201772	0.0825341	0.840397	0.255012
St8sia5	St8sia5	ENSMUSG00000025425	225742	18	ST8 alpha-N-acetyl-neuraminide alpha-2,8-sialyltransferase 5 [Source:MGI Symbol;Acc:MGI:109243]	9476	15.8867	8.03684	0.280971	-5.57357	2.1823	3.39128	2.28845e-10	0.771076	4.33226e-07	0.0468682	0.0254928	5.85887e-09	0.865701	1.82155e-05	0.211895	0.161184
Arhgef17	Arhgef17	ENSMUSG00000032875	207212	7	Rho guanine nucleotide exchange factor (GEF) 17 [Source:MGI Symbol;Acc:MGI:2673002]	9232	3.37191	8.02851	5.55605	-2.93561	-0.463146	3.39876	1.16628e-06	0.000235524	0.0220579	0.745622	0.0772529	1.2699e-05	0.00224868	0.0984634	0.894158	0.31001
Pgap3	Pgap3	ENSMUSG00000038208	320655	11	post-GPI attachment to proteins 3 [Source:MGI Symbol;Acc:MGI:2444461]	8967	14.4093	8.0266	5.22492	-2.37895	0.422724	1.95623	6.12716e-06	0.000870576	0.0788941	0.767527	0.323436	5.38441e-05	0.00638305	0.228046	0.90381	0.637762
Gm10033	Gm10033	ENSMUSG00000110444		8	predicted gene 10033 [Source:MGI Symbol;Acc:MGI:3642803]	9937	15.3579	7.98707	2.60611	-5.0543	0.326658	4.72764	1.49237e-08	0.0311159	2.13336e-05	0.81067	0.0102599	2.52158e-07	0.098312	0.000495156	0.921625	0.0897294
Gmnn	Gmnn	ENSMUSG00000006715	57441	13	geminin [Source:MGI Symbol;Acc:MGI:1927344]	4114	71.1503	7.86385	5.04894	-3.66053	-0.845614	4.50614	2.55079e-19	9.91716e-11	3.12832e-07	0.226519	4.77276e-06	3.031e-17	6.30316e-09	1.37898e-05	0.516544	0.000264852
Zfp341	Zfp341	ENSMUSG00000059842	228807	2	zinc finger protein 341 [Source:MGI Symbol;Acc:MGI:2682937]	6487	15.5151	7.8583	0.808151	-5.80573	1.24442	4.56131	1.0548e-14	0.296048	2.63541e-10	0.122766	6.77354e-05	6.06897e-13	0.479964	3.09789e-08	0.371562	0.00237057
Chrnb2	Chrnb2	ENSMUSG00000027950	11444	3	cholinergic receptor, nicotinic, beta polypeptide 2 (neuronal) [Source:MGI Symbol;Acc:MGI:87891]	10035	4.90038	7.85425	0.784606	-5.42539	1.64426	3.78113	5.58494e-08	0.492788	1.4775e-05	0.207674	0.0394802	8.27297e-07	0.664507	0.000362967	0.492899	0.213291
Pbxip1	Pbxip1	ENSMUSG00000042613	229534	3	pre B cell leukemia transcription factor interacting protein 1 [Source:MGI Symbol;Acc:MGI:2441670]	3844	15.7913	7.71433	1.20987	-5.40261	1.10185	4.30076	9.2128e-33	0.014914	9.01039e-21	0.0312947	3.10732e-09	4.79592e-30	0.0569273	1.64169e-17	0.166298	4.71794e-07
Nynrin	Nynrin	ENSMUSG00000075592	277154	14	NYN domain and retroviral integrase containing [Source:MGI Symbol;Acc:MGI:2652872]	6916	6.76744	7.67485	4.492	-4.21269	-1.02984	5.24253	3.94236e-27	1.02353e-11	1.13128e-12	0.13162	2.65076e-09	1.19716e-24	7.99227e-10	2.94455e-10	0.386586	4.08142e-07
Ncaph	Ncaph	ENSMUSG00000034906	215387	2	non-SMC condensin I complex, subunit H [Source:MGI Symbol;Acc:MGI:2444777]	8522	15.01	7.66922	-1.19961	-5.87868	2.99014	2.88854	2.69282e-09	0.223562	5.86217e-07	0.0053363	0.0457383	5.35236e-08	0.398042	2.35608e-05	0.0538656	0.231916
Plxna2	Plxna2	ENSMUSG00000026640	18845	1	plexin A2 [Source:MGI Symbol;Acc:MGI:107684]	6867	4.65276	7.51691	1.29178	-4.09367	2.13146	1.96221	2.30411e-12	0.115202	6.11767e-06	0.0138562	0.0955822	8.53849e-11	0.251626	0.000177396	0.0986818	0.348093
Zfp69	Zfp69	ENSMUSG00000064141	381549	4	zinc finger protein 69 [Source:MGI Symbol;Acc:MGI:107794]	7723	18.0402	7.50798	3.33723	-4.22316	-0.0524145	4.27557	2.42383e-08	0.00303114	0.000228697	0.961216	0.00526912	3.87954e-07	0.0168033	0.00342951	0.985558	0.0577754
Dxo	Dxo	ENSMUSG00000040482	112403	17	decapping exoribonuclease [Source:MGI Symbol;Acc:MGI:1890444]	6807	32.6816	7.49423	2.99197	-4.92498	-0.42272	5.3477	1.05573e-09	0.00329815	5.60531e-06	0.666902	0.000167905	2.29905e-08	0.0179505	0.000165168	0.856564	0.00492103
Tmem177	Tmem177	ENSMUSG00000036975	66343	1	transmembrane protein 177 [Source:MGI Symbol;Acc:MGI:1913593]	8483	12.0243	7.46934	5.24674	-4.49303	-2.27043	6.76347	3.79734e-13	4.66054e-07	3.25148e-07	0.0340284	5.49135e-07	1.56651e-11	1.17665e-05	1.42181e-05	0.174467	4.57049e-05
Accs	Accs	ENSMUSG00000040272	329470	2	1-aminocyclopropane-1-carboxylate synthase (non-functional) [Source:MGI Symbol;Acc:MGI:1919717]	9366	8.22779	7.41864	5.63023	-3.27123	-1.48283	4.75407	3.52192e-07	6.78633e-05	0.00553154	0.279725	0.00820485	4.25432e-06	0.00081436	0.0377753	0.572865	0.0783366
Ankrd6	Ankrd6	ENSMUSG00000040183	140577	4	ankyrin repeat domain 6 [Source:MGI Symbol;Acc:MGI:2154278]	10158	5.33166	7.40392	4.99563	-3.09976	-0.691466	3.79123	5.97884e-05	0.00367002	0.0353775	0.685487	0.0983992	0.000379563	0.0195806	0.134147	0.865028	0.353268
Map3k14	Map3k14	ENSMUSG00000020941	53859	11	mitogen-activated protein kinase kinase kinase 14 [Source:MGI Symbol;Acc:MGI:1858204]	9859	6.79237	7.39892	4.99512	-2.41274	-0.00893542	2.42168	4.87882e-05	0.00248525	0.0898843	0.995443	0.257985	0.000318991	0.0143598	0.247386	0.998992	0.573803
Ccdc19	Ccdc19					8344	17.8359	7.3939	2.844	-6.32427	-1.77437	8.09864	2.17974e-05	0.0557045	0.00013249	0.224983	0.000178989	0.000162323	0.152377	0.00223515	0.514841	0.00517646
Lxn	Lxn	ENSMUSG00000047557	17035	3	latexin [Source:MGI Symbol;Acc:MGI:107633]	7488	43.694	7.37403	2.71963	-3.94256	0.711843	3.23072	9.45169e-14	0.000778746	2.20128e-06	0.379593	0.00404386	4.4537e-12	0.00583899	7.61532e-05	0.660783	0.0487403
A930024E05Rik	A930024E05Rik	ENSMUSG00000056735		5	RIKEN cDNA A930024E05 gene [Source:MGI Symbol;Acc:MGI:1924414]	7753	23.0908	7.35813	1.40579	-4.95252	0.999827	3.95269	2.53797e-10	0.123217	1.59181e-06	0.285393	0.00283279	6.45234e-09	0.26417	5.66829e-05	0.57905	0.0383268
Nudt14	Nudt14	ENSMUSG00000002804	66174	12	nudix (nucleoside diphosphate linked moiety X)-type motif 14 [Source:MGI Symbol;Acc:MGI:1913424]	10156	33.2362	7.35569	2.40775	-3.55568	1.39226	2.16342	8.8761e-05	0.110721	0.0207595	0.379951	0.33495	0.000527643	0.244956	0.0946781	0.660889	0.648229
Rab11fip1	Rab11fip1	ENSMUSG00000031488	75767	8	RAB11 family interacting protein 1 (class I) [Source:MGI Symbol;Acc:MGI:1923017]	10389	2.85262	7.34011	3.47046	-3.79778	0.0718729	3.72591	1.21912e-05	0.0202875	0.00543342	0.96507	0.0959092	9.87213e-05	0.0714507	0.0374752	0.986271	0.348431
Il18bp	Il18bp	ENSMUSG00000070427	16068	7	interleukin 18 binding protein [Source:MGI Symbol;Acc:MGI:1333800]	9494	23.3005	7.32373	5.03965	-3.29055	-1.00646	4.29701	3.29281e-07	0.000185021	0.00476081	0.445336	0.0140829	4.00909e-06	0.0018371	0.0342109	0.714053	0.111642
Slc4a3	Slc4a3	ENSMUSG00000006576	20536	1	solute carrier family 4 (anion exchanger), member 3 [Source:MGI Symbol;Acc:MGI:109350]	10004	6.35424	7.3128	4.14072	-2.65565	0.516433	2.13921	5.13604e-05	0.00845058	0.0626343	0.737425	0.317064	0.000334011	0.036879	0.197382	0.891368	0.63051
Megf11	Megf11	ENSMUSG00000036466	214058	9	multiple EGF-like-domains 11 [Source:MGI Symbol;Acc:MGI:1920951]	9311	5.39385	7.29607	5.59591	-4.53553	-2.83537	7.3709	2.61162e-08	5.45359e-05	6.32627e-05	0.0463757	3.42123e-05	4.15579e-07	0.000690031	0.00121275	0.210802	0.001365
Pex11g	Pex11g	ENSMUSG00000069633	69129	8	peroxisomal biogenesis factor 11 gamma [Source:MGI Symbol;Acc:MGI:1920905]	9234	29.5462	7.27281	2.01764	-3.82062	1.43456	2.38606	6.76632e-06	0.115423	0.00495777	0.274232	0.191678	5.86593e-05	0.252007	0.0350799	0.567393	0.496782
Nrn1l	Nrn1l	ENSMUSG00000044287	234700	8	neuritin 1-like [Source:MGI Symbol;Acc:MGI:2443642]	9843	49.1035	7.25419	7.0877	-3.31064	-3.14415	6.45479	6.93125e-08	4.98073e-06	0.00230653	0.0608187	0.00105213	1.00361e-06	9.51912e-05	0.0204113	0.248973	0.0185814
Gipr	Gipr	ENSMUSG00000030406	381853	7	gastric inhibitory polypeptide receptor [Source:MGI Symbol;Acc:MGI:1352753]	8073	24.5821	7.23678	2.04616	-4.68296	0.507661	4.1753	7.8064e-21	0.00144514	3.14451e-12	0.457375	6.52948e-06	1.2368e-18	0.00954004	6.36588e-10	0.722965	0.000344832
Sp100	Sp100	ENSMUSG00000026222	20684	1	nuclear antigen Sp100 [Source:MGI Symbol;Acc:MGI:109561]	10120	11.9685	7.22528	4.68442	-3.54941	-1.00856	4.55797	3.59698e-06	0.00165415	0.00539951	0.514557	0.0237991	3.3811e-05	0.0105318	0.0373119	0.764493	0.154777
Pdss1	Pdss1	ENSMUSG00000026784	56075	2	prenyl (solanesyl) diphosphate synthase, subunit 1 [Source:MGI Symbol;Acc:MGI:1889278]	5206	38.867	7.20708	-0.299681	-5.36444	2.14233	3.22211	8.94775e-20	0.622491	1.1955e-13	0.000879553	0.000285707	1.1374e-17	0.766337	4.35641e-11	0.01519	0.00736639
Plk4	Plk4	ENSMUSG00000025758	20873	3	polo-like kinase 4 [Source:MGI Symbol;Acc:MGI:101783]	5642	16.5662	7.18987	0.60192	-5.41998	1.16797	4.25201	1.29946e-17	0.357326	2.1e-12	0.08309	9.76887e-06	1.23528e-15	0.540075	4.59143e-10	0.297621	0.000476756
Prkar2b	Prkar2b	ENSMUSG00000002997	19088	12	protein kinase, cAMP dependent regulatory, type II beta [Source:MGI Symbol;Acc:MGI:97760]	7934	12.9622	7.18189	1.12083	-5.04549	1.01557	4.02992	1.17564e-11	0.179603	1.08074e-07	0.240437	0.000958795	3.87112e-10	0.340872	5.76325e-06	0.533313	0.0173622
Dock11	Dock11	ENSMUSG00000031093	75974	X	dedicator of cytokinesis 11 [Source:MGI Symbol;Acc:MGI:1923224]	10574	2.84066	7.15143	4.22497	-3.77332	-0.846858	4.62018	3.41507e-05	0.0132622	0.00709388	0.656939	0.0705517	0.000235098	0.0522369	0.0449046	0.852928	0.294829
Acat3	Acat3	ENSMUSG00000062480	224530	17	acetyl-Coenzyme A acetyltransferase 3 [Source:MGI Symbol;Acc:MGI:109182]	6769	27.8521	7.14151	-2.18387	-4.68537	4.64001	0.0453627	1.66933e-08	0.0301818	3.01276e-05	4.09526e-05	0.97785	2.79461e-07	0.0961592	0.00064453	0.0014946	0.991907
Slc35g1	Slc35g1	ENSMUSG00000044026	240660	19	solute carrier family 35, member G1 [Source:MGI Symbol;Acc:MGI:2444789]	8146	13.0207	7.14061	-3.21668	-4.91945	5.43784	-0.518395	1.00334e-09	0.000868197	2.38725e-06	5.72952e-07	0.681344	2.20695e-08	0.00636989	8.02997e-05	4.26089e-05	0.871007
2810408A11Rik	2810408A11Rik	ENSMUSG00000018570	70419	11	RIKEN cDNA 2810408A11 gene [Source:MGI Symbol;Acc:MGI:1917669]	8654	21.1861	7.11878	4.53646	-3.50019	-0.917875	4.41807	2.86541e-05	0.00305333	0.0141993	0.510532	0.025395	0.00020288	0.0169007	0.0719908	0.762763	0.160733
A330021E22Rik	A330021E22Rik					8653	12.695	7.09705	3.60965	-3.2166	0.270806	2.94579	1.71331e-07	0.00193584	0.00409686	0.807504	0.0575749	2.26206e-06	0.0118958	0.0307004	0.920259	0.263733
Gls2	Gls2	ENSMUSG00000044005	216456	10	glutaminase 2 (liver, mitochondrial) [Source:MGI Symbol;Acc:MGI:2143539]	8975	15.0147	7.07231	6.79203	-3.89077	-3.61049	7.50126	1.41961e-10	8.24337e-08	3.05461e-05	0.00604536	1.89658e-06	3.78517e-09	2.61207e-06	0.00065125	0.0585366	0.000119846
Enho	Enho	ENSMUSG00000028445	69638	4	energy homeostasis associated [Source:MGI Symbol;Acc:MGI:1916888]	8468	33.7384	7.06417	1.99444	-4.08339	0.986338	3.09705	1.74989e-12	0.0139251	1.91662e-06	0.240513	0.00751665	6.59648e-11	0.0541163	6.69409e-05	0.533313	0.0734494
Arrdc4	Arrdc4	ENSMUSG00000042659	66412	7	arrestin domain containing 4 [Source:MGI Symbol;Acc:MGI:1913662]	9303	8.75418	7.05409	-1.97385	-5.76792	3.26002	2.5079	4.30645e-07	0.0779684	9.7786e-06	0.00651824	0.117678	5.10055e-06	0.192232	0.000257589	0.0612177	0.385167
Foxo6	Foxo6	ENSMUSG00000052135	329934	4	forkhead box O6 [Source:MGI Symbol;Acc:MGI:2676586]	8083	17.184	7.01481	1.28673	-4.68363	1.04445	3.63919	5.83124e-12	0.112663	2.21432e-07	0.213923	0.00199138	2.02372e-10	0.247863	1.02913e-05	0.500251	0.0294584
Med27	Med27	ENSMUSG00000026799	68975	2	mediator complex subunit 27 [Source:MGI Symbol;Acc:MGI:1916225]	3070	66.2372	7.00129	1.0512	-4.73739	1.2127	3.52469	1.92029e-51	0.00395205	3.07275e-30	0.00122576	2.42371e-11	4.19853e-48	0.0207113	3.35913e-26	0.0192252	5.19529e-09
Arhgef26	Arhgef26	ENSMUSG00000036885	622434	3	Rho guanine nucleotide exchange factor (GEF) 26 [Source:MGI Symbol;Acc:MGI:1918053]	10063	5.21725	6.99843	2.36801	-4.40004	0.230378	4.16966	9.75761e-07	0.0531566	0.000368839	0.859327	0.0188944	1.08295e-05	0.147228	0.00502135	0.942241	0.133003
Greb1l	Greb1l	ENSMUSG00000042942	381157	18	growth regulation by estrogen in breast cancer-like [Source:MGI Symbol;Acc:MGI:3576497]	10488	2.51497	6.98861	1.0903	-3.05859	2.83972	0.218874	0.000141915	0.441073	0.0379752	0.0823225	0.968245	0.00079764	0.618551	0.141206	0.295647	0.988378
Serp2	Serp2	ENSMUSG00000052584	72661	14	stress-associated endoplasmic reticulum protein family member 2 [Source:MGI Symbol;Acc:MGI:1919911]	8386	41.1011	6.96286	1.36067	-4.66466	0.937536	3.72713	3.33135e-05	0.304669	0.00188055	0.482326	0.0515481	0.000230496	0.48944	0.0175711	0.740248	0.248992
Katnb1	Katnb1	ENSMUSG00000031787	74187	8	katanin p80 (WD40-containing) subunit B 1 [Source:MGI Symbol;Acc:MGI:1921437]	5750	16.8308	6.94398	1.26395	-4.91477	0.765264	4.14951	1.69375e-13	0.0901331	8.35882e-09	0.308846	0.000124967	7.40642e-12	0.212311	6.42185e-07	0.598462	0.00387008
Leng9	Leng9	ENSMUSG00000043432	243813	7	leukocyte receptor cluster (LRC) member 9 [Source:MGI Symbol;Acc:MGI:2444509]	8514	25.0357	6.92783	1.6123	-4.2689	1.04663	3.22228	1.75632e-13	0.0338947	1.74542e-07	0.188607	0.00332439	7.64946e-12	0.10482	8.59502e-06	0.470958	0.0430596
Prkg1	Prkg1	ENSMUSG00000052920	19091	19	protein kinase, cGMP-dependent, type I [Source:MGI Symbol;Acc:MGI:108174]	9411	4.89608	6.91754	-1.19946	-5.44398	2.67302	2.77096	4.87749e-08	0.233888	3.3377e-06	0.0136658	0.0606111	7.3042e-07	0.411071	0.000106378	0.0976655	0.271335
Dennd1b	Dennd1b	ENSMUSG00000056268	329260	1	DENN/MADD domain containing 1B [Source:MGI Symbol;Acc:MGI:2447812]	4953	8.00478	6.85748	1.05305	-4.8297	0.974726	3.85497	1.21271e-29	0.0291	1.12099e-18	0.0492179	3.75421e-08	4.69348e-27	0.0935649	1.11406e-15	0.21884	4.23103e-06
Garnl3	Garnl3	ENSMUSG00000038860	99326	2	GTPase activating RANGAP domain-like 3 [Source:MGI Symbol;Acc:MGI:2139309]	5086	18.7637	6.85288	0.318761	-5.24172	1.2924	3.94932	1.10419e-15	0.633561	3.32752e-11	0.0598171	5.60417e-05	7.45125e-14	0.774965	5.05228e-09	0.246453	0.0020582
Abcc4	Abcc4	ENSMUSG00000032849	239273	14	ATP-binding cassette, sub-family C (CFTR/MRP), member 4 [Source:MGI Symbol;Acc:MGI:2443111]	10203	4.32108	6.83826	2.78604	-4.0188	0.0334124	3.98539	3.60366e-05	0.0518173	0.00466374	0.981965	0.0508111	0.000245913	0.144765	0.0337196	0.992777	0.247204
Abcd2	Abcd2	ENSMUSG00000055782	26874	15	ATP-binding cassette, sub-family D (ALD), member 2 [Source:MGI Symbol;Acc:MGI:1349467]	10507	3.79162	6.82972	1.96412	-2.81599	2.04961	0.766383	0.000161289	0.175654	0.051744	0.204743	0.765689	0.000889165	0.336591	0.174462	0.489769	0.911291
Epha7	Epha7	ENSMUSG00000028289	13841	4	Eph receptor A7 [Source:MGI Symbol;Acc:MGI:95276]	10269	3.394	6.81462	2.41546	-4.92003	-0.520875	5.44091	5.21373e-05	0.107366	0.00116842	0.737812	0.0114373	0.000338057	0.240222	0.0123413	0.891649	0.0968717
Nmnat3	Nmnat3	ENSMUSG00000032456	74080	9	nicotinamide nucleotide adenylyltransferase 3 [Source:MGI Symbol;Acc:MGI:1921330]	9761	13.5926	6.79736	0.263715	-5.45427	1.07937	4.37491	8.71638e-06	0.830078	0.000127375	0.398875	0.0165601	7.34676e-05	0.904367	0.00216222	0.675313	0.122736
Dph2	Dph2	ENSMUSG00000028540	67728	4	DPH2 homolog [Source:MGI Symbol;Acc:MGI:1914978]	9222	12.2653	6.79518	2.7457	-4.76214	-0.712665	5.47481	8.81148e-05	0.0625393	0.00237281	0.619104	0.00847651	0.000524101	0.16502	0.0207849	0.833371	0.0797463
C030034I22Rik	C030034I22Rik	ENSMUSG00000073374		17	RIKEN cDNA C030034I22 gene [Source:MGI Symbol;Acc:MGI:1924783]	8723	14.9155	6.793	0.634957	-3.25676	2.90128	0.355478	8.27449e-07	0.553349	0.00488554	0.0131294	0.824151	9.32304e-06	0.714109	0.0347261	0.0958149	0.934774
Lipe	Lipe	ENSMUSG00000003123	16890	7	lipase, hormone sensitive [Source:MGI Symbol;Acc:MGI:96790]	6445	19.6664	6.7919	1.54701	-4.6523	0.592583	4.05972	2.10699e-17	0.0168452	9.41661e-11	0.365627	1.30361e-05	1.9356e-15	0.0624126	1.27089e-08	0.647607	0.000619611
Doc2g	Doc2g	ENSMUSG00000024871	60425	19	double C2, gamma [Source:MGI Symbol;Acc:MGI:1926250]	9979	19.0791	6.78851	5.5266	-2.77996	-1.51805	4.29801	6.32578e-05	0.000948836	0.0448201	0.340203	0.0419393	0.000398349	0.00683762	0.15867	0.628589	0.220636
Pcdh18	Pcdh18	ENSMUSG00000037892	73173	3	protocadherin 18 [Source:MGI Symbol;Acc:MGI:1920423]	9740	5.88129	6.78286	4.8442	-1.92978	0.00886887	1.92091	0.000115524	0.00275003	0.166772	0.995216	0.348597	0.000666881	0.0155464	0.364485	0.998992	0.660915
Rgs9	Rgs9	ENSMUSG00000020599	19739	11	regulator of G-protein signaling 9 [Source:MGI Symbol;Acc:MGI:1338824]	9064	14.4735	6.77098	2.19987	-3.94678	0.624328	3.32245	1.32806e-06	0.05618	0.0011564	0.58761	0.040722	1.41366e-05	0.153195	0.0122893	0.814267	0.216418
2410131K14Rik	2410131K14Rik	ENSMUSG00000032840	76792	5	RIKEN cDNA 2410131K14 gene [Source:MGI Symbol;Acc:MGI:1924042]	5719	22.033	6.76866	2.47589	-4.78702	-0.494246	5.28126	1.39475e-16	0.000322146	1.13435e-10	0.462846	5.97875e-08	1.0891e-14	0.00288664	1.49406e-08	0.725166	6.47126e-06
Kcnma1	Kcnma1	ENSMUSG00000063142	16531	14	potassium large conductance calcium-activated channel, subfamily M, alpha member 1 [Source:MGI Symbol;Acc:MGI:99923]	9789	5.9674	6.76068	4.76489	-4.10903	-2.11324	6.22228	2.00857e-06	0.000827274	0.000885995	0.140025	0.000861184	2.04448e-05	0.00611478	0.00995447	0.399779	0.0160383
Kif17	Kif17	ENSMUSG00000028758	16559	4	kinesin family member 17 [Source:MGI Symbol;Acc:MGI:1098229]	10356	7.52681	6.76052	4.37409	-3.67626	-1.28984	4.9661	1.4026e-05	0.0045914	0.00483718	0.430647	0.0185587	0.000111514	0.0233348	0.0345509	0.702451	0.131572
Hspb6	Hspb6	ENSMUSG00000036854	243912	7	heat shock protein, alpha-crystallin-related, B6 [Source:MGI Symbol;Acc:MGI:2685325]	5842	45.3632	6.74314	3.46599	-4.14023	-0.863081	5.00331	1.23062e-42	1.22229e-14	4.62094e-22	0.057914	2.42785e-16	1.49479e-39	1.48468e-12	1.68387e-18	0.24248	1.39691e-13
Zfp951	Zfp951	ENSMUSG00000072774	626391	5	zinc finger protein 951 [Source:MGI Symbol;Acc:MGI:2441896]	10233	8.75631	6.73846	3.47647	-3.78236	-0.520361	4.30272	6.66946e-06	0.0112544	0.00286525	0.716065	0.0244067	5.79947e-05	0.0459766	0.0239122	0.880263	0.157599
Mcc	Mcc	ENSMUSG00000071856	328949	18	mutated in colorectal cancers [Source:MGI Symbol;Acc:MGI:96930]	9316	4.48984	6.73638	3.36833	-4.37969	-1.01164	5.39133	5.88487e-09	0.00144013	1.78613e-05	0.343172	0.000196283	1.08488e-07	0.00951842	0.000423557	0.631663	0.00550196
Mmp16	Mmp16	ENSMUSG00000028226	17389	4	matrix metallopeptidase 16 [Source:MGI Symbol;Acc:MGI:1276107]	5824	13.0282	6.70975	0.643629	-4.97831	1.08781	3.89051	9.01123e-19	0.284963	8.16874e-13	0.0784992	9.61478e-06	9.95058e-17	0.469089	2.17806e-10	0.286816	0.00047134
Fam49a	Fam49a	ENSMUSG00000020589	76820	12	family with sequence similarity 49, member A [Source:MGI Symbol;Acc:MGI:1261783]	6533	11.5442	6.70678	0.650518	-4.47068	1.58558	2.8851	2.4511e-31	0.156365	2.17168e-18	0.0011872	1.66763e-05	1.11648e-28	0.31125	1.82621e-15	0.0188083	0.000747153
Lgals2	Lgals2	ENSMUSG00000043501	107753	15	lectin, galactose-binding, soluble 2 [Source:MGI Symbol;Acc:MGI:895068]	9978	48.4349	6.70365	-1.64019	-3.19953	5.14431	-1.94478	0.000160738	0.241787	0.0308868	0.00199948	0.325795	0.000886573	0.420469	0.123547	0.0274947	0.639427
Bag2	Bag2	ENSMUSG00000042215	213539	1	BCL2-associated athanogene 2 [Source:MGI Symbol;Acc:MGI:1891254]	10456	12.2861	6.70003	4.26774	-2.92286	-0.490569	3.41342	3.10894e-05	0.00506222	0.024374	0.761673	0.109701	0.000217524	0.0251432	0.105752	0.901855	0.371172
Tmem132c	Tmem132c	ENSMUSG00000034324	208213	5	transmembrane protein 132C [Source:MGI Symbol;Acc:MGI:2443061]	10147	5.19328	6.69966	6.23223	-1.60873	-1.1413	2.75003	0.000219709	0.000628747	0.25697	0.499817	0.217122	0.00116088	0.00494138	0.471659	0.753655	0.529689
Zfpm1	Zfpm1	ENSMUSG00000049577	22761	8	zinc finger protein, multitype 1 [Source:MGI Symbol;Acc:MGI:1095400]	4986	19.4891	6.68503	0.89967	-4.69182	1.09354	3.59828	1.41644e-25	0.0772512	5.17227e-16	0.0362941	1.1028e-06	3.60106e-23	0.190999	2.69253e-13	0.182396	7.8796e-05
Gins3	Gins3	ENSMUSG00000031669	78833	8	GINS complex subunit 3 (Psf3 homolog) [Source:MGI Symbol;Acc:MGI:1926083]	4934	26.7184	6.68233	1.71449	-4.75352	0.214329	4.53919	1.81696e-14	0.0152956	2.12934e-09	0.758824	8.14434e-06	9.93151e-13	0.0580395	1.95613e-07	0.900492	0.000410294
Inca1	Inca1	ENSMUSG00000057054	103844	11	inhibitor of CDK, cyclin A1 interacting protein 1 [Source:MGI Symbol;Acc:MGI:2144284]	10514	16.296	6.66932	0.995036	-3.22809	2.4462	0.781892	0.000328202	0.495853	0.0351877	0.136753	0.761259	0.00162202	0.666748	0.133613	0.396126	0.908525
Rnf128	Rnf128	ENSMUSG00000031438	66889	X	ring finger protein 128 [Source:MGI Symbol;Acc:MGI:1914139]	6645	20.8432	6.66916	5.54444	-2.53668	-1.41196	3.94865	1.23897e-10	2.87423e-08	0.00287959	0.109427	0.00122424	3.36192e-09	1.02444e-06	0.0239753	0.347866	0.0207512
Inpp1	Inpp1	ENSMUSG00000026102	16329	1	inositol polyphosphate-1-phosphatase [Source:MGI Symbol;Acc:MGI:104848]	9002	21.9059	6.65042	0.945503	-4.04724	1.65767	2.38957	4.78984e-10	0.266749	1.39336e-05	0.0667097	0.0541907	1.14329e-08	0.449297	0.000346975	0.261669	0.256642
Pkia	Pkia	ENSMUSG00000027499	18767	3	protein kinase inhibitor, alpha [Source:MGI Symbol;Acc:MGI:104747]	5087	17.902	6.64462	1.20822	-4.66533	0.771061	3.89427	1.43457e-29	0.0109553	1.84659e-18	0.111502	1.41851e-08	5.22756e-27	0.0449394	1.68224e-15	0.351379	1.84608e-06
Arrb1	Arrb1	ENSMUSG00000018909	109689	7	arrestin, beta 1 [Source:MGI Symbol;Acc:MGI:99473]	8330	6.28482	6.64282	0.607669	-4.49091	1.54424	2.94667	3.08294e-14	0.384103	8.64402e-09	0.0368912	0.00388828	1.62032e-12	0.566286	6.517e-07	0.184153	0.0473928
Gm16432	Gm16432	ENSMUSG00000091476	545391	1	predicted gene 16432 [Source:MGI Symbol;Acc:MGI:3645414]	9920	17.2803	6.63552	-0.743735	-4.16801	3.21124	0.956773	4.18226e-05	0.558764	0.00339466	0.0230231	0.618011	0.000278483	0.718974	0.0268527	0.13746	0.840003
Sez6l	Sez6l	ENSMUSG00000058153	56747	5	seizure related 6 homolog like [Source:MGI Symbol;Acc:MGI:1935121]	10076	4.44726	6.6074	-2.22638	-3.17891	5.65487	-2.47596	0.000332936	0.133462	0.0389366	0.00140213	0.23351	0.00164244	0.278542	0.143754	0.02123	0.546911
Gabrb3	Gabrb3	ENSMUSG00000033676	14402	7	gamma-aminobutyric acid (GABA) A receptor, subunit beta 3 [Source:MGI Symbol;Acc:MGI:95621]	10324	4.24246	6.60159	-3.87827	-4.9313	5.54856	-0.617269	1.49464e-05	0.00321406	0.000328336	0.0001607	0.709445	0.000117719	0.0176209	0.00458376	0.00434844	0.884064
Cxcl12	Cxcl12	ENSMUSG00000061353	20315	6	chemokine (C-X-C motif) ligand 12 [Source:MGI Symbol;Acc:MGI:103556]	4339	23.2149	6.58892	0.398416	-4.63861	1.5519	3.08671	1.46104e-34	0.349417	1.68701e-21	0.000463413	5.92193e-07	1.14086e-31	0.533942	4.61061e-18	0.00952262	4.82743e-05
Casc1	Casc1	ENSMUSG00000043541	320662	6	cancer susceptibility candidate 1 [Source:MGI Symbol;Acc:MGI:2444480]	10440	8.97041	6.58469	4.52201	-3.00625	-0.943559	3.94981	1.92749e-05	0.00281178	0.0166741	0.558386	0.0578312	0.000147146	0.0158282	0.081254	0.795449	0.264524
Btg3	Btg3	ENSMUSG00000022863	12228	16	B cell translocation gene 3 [Source:MGI Symbol;Acc:MGI:109532]	10481	8.39723	6.58376	3.433	-2.87481	0.275947	2.59886	4.18285e-05	0.0169185	0.0271726	0.857586	0.213608	0.000278483	0.0625897	0.113162	0.941468	0.524798
Scrg1	Scrg1	ENSMUSG00000031610	20284	8	scrapie responsive gene 1 [Source:MGI Symbol;Acc:MGI:1328308]	7908	68.0228	6.5567	-0.876921	-4.62889	2.80473	1.82417	1.99476e-19	0.13004	1.5933e-12	9.41674e-06	0.0305804	2.39634e-17	0.274069	3.95863e-10	0.000439931	0.181786
D130017N08Rik	D130017N08Rik	ENSMUSG00000105354;ENSMUSG00000097287		5	RIKEN cDNA D130017N08 gene [Source:MGI Symbol;Acc:MGI:2443273]	9880	17.6829	6.54737	-1.18944	-4.17164	3.56518	0.606467	6.79812e-06	0.302854	0.00112754	0.00584577	0.730569	5.88417e-05	0.487684	0.0120845	0.0572634	0.892702
Fads2	Fads2	ENSMUSG00000024665	56473	19	fatty acid desaturase 2 [Source:MGI Symbol;Acc:MGI:1930079]	10607	13.0013	6.54347	0.226679	-3.79	2.52679	1.26321	5.64013e-05	0.860679	0.00553133	0.0931256	0.579119	0.000361418	0.924391	0.0377753	0.317644	0.818479
Bhlhb9	Bhlhb9	ENSMUSG00000072964	70237	X	basic helix-loop-helix domain containing, class B9 [Source:MGI Symbol;Acc:MGI:1917487]	10121	9.58724	6.54031	-1.85642	-3.82334	4.57339	-0.750056	5.68267e-05	0.153916	0.00639882	0.00233154	0.670227	0.000363505	0.307738	0.0418339	0.0305616	0.865883
Crip2	Crip2	ENSMUSG00000006356	68337	12	cysteine rich protein 2 [Source:MGI Symbol;Acc:MGI:1915587]	6698	38.5112	6.52977	0.871119	-4.47697	1.18168	3.2953	7.72461e-28	0.0714063	6.14681e-17	0.0196121	2.67044e-06	2.55895e-25	0.180656	4.79978e-14	0.123787	0.000161289
Hspbap1	Hspbap1	ENSMUSG00000022849	66667	16	Hspb associated protein 1 [Source:MGI Symbol;Acc:MGI:1913917]	6461	12.4818	6.52797	0.374444	-4.54897	1.60456	2.94441	5.16014e-33	0.392116	1.742e-20	0.000561455	4.07086e-06	3.31827e-30	0.573543	2.7205e-17	0.0108251	0.000235464
Gm1976	Gm1976	ENSMUSG00000066057		17	predicted gene 1976 [Source:MGI Symbol;Acc:MGI:3780145]	7961	24.9756	6.52334	1.01694	-4.43606	1.07034	3.36572	3.01531e-14	0.143177	8.40034e-09	0.137327	0.000829036	1.59243e-12	0.29289	6.42185e-07	0.397089	0.0156529
Fam43a	Fam43a	ENSMUSG00000046546	224093	16	family with sequence similarity 43, member A [Source:MGI Symbol;Acc:MGI:2676309]	8282	13.9236	6.5095	6.35055	-3.76275	-3.60379	7.36654	2.63433e-12	1.03856e-09	3.20036e-06	0.000500731	1.27949e-08	9.66392e-11	5.19744e-08	0.000102599	0.0101183	1.68522e-06
Mir6374	Mir6374	ENSMUSG00000099045		6	microRNA 6374 [Source:MGI Symbol;Acc:MGI:5530674]	10568	188.773	6.4883	2.02354	-3.468	0.996764	2.47123	6.10259e-05	0.141338	0.0101858	0.513912	0.248368	0.000386073	0.290113	0.0572213	0.763845	0.562493
Toporsos	Toporsos	ENSMUSG00000028407		4	topoisomerase I binding, arginine/serine-rich, opposite strand [Source:MGI Symbol;Acc:MGI:1913684]	7450	155.625	6.48531	-0.310725	-4.89249	1.90354	2.98895	1.39263e-16	0.62012	1.23886e-11	0.0040048	0.00106425	1.0891e-14	0.764623	2.18439e-09	0.0446739	0.018735
Epha5	Epha5	ENSMUSG00000029245	13839	5	Eph receptor A5 [Source:MGI Symbol;Acc:MGI:99654]	9706	4.02215	6.47189	-0.632118	-3.565	3.53901	0.0259885	6.84453e-05	0.621461	0.0110156	0.0136689	0.999619	0.000424415	0.765328	0.0601211	0.0976655	0.999802
Hn1	Hn1	ENSMUSG00000020737	15374	11	hematological and neurological expressed sequence 1 [Source:MGI Symbol;Acc:MGI:1096361]	6415	42.7489	6.4718	-0.0159227	-4.72103	1.76669	2.95434	5.28221e-21	0.976839	6.1208e-14	0.0021709	0.000213256	8.74927e-19	0.988229	2.30733e-11	0.0290481	0.00587233
Psd2	Psd2	ENSMUSG00000024347	74002	18	pleckstrin and Sec7 domain containing 2 [Source:MGI Symbol;Acc:MGI:1921252]	10800	3.51299	6.47146	3.7942	-3.56733	-0.890071	4.4574	5.12043e-05	0.0275623	0.00583833	0.656726	0.10555	0.000333193	0.0898899	0.0393493	0.852928	0.364689
Ccdc14	Ccdc14	ENSMUSG00000022833	239839	16	coiled-coil domain containing 14 [Source:MGI Symbol;Acc:MGI:2443448]	7340	12.3891	6.4626	2.26379	-4.13293	0.0658817	4.06705	7.38417e-20	0.000174052	4.43888e-11	0.913711	1.63586e-06	9.49691e-18	0.00176179	6.47012e-09	0.965463	0.000107057
Tmem9	Tmem9	ENSMUSG00000026411	66241	1	transmembrane protein 9 [Source:MGI Symbol;Acc:MGI:1913491]	6019	37.8027	6.45418	1.06798	-4.41547	0.970731	3.44474	6.37601e-35	0.0124733	5.61953e-21	0.0290385	2.53751e-08	5.36173e-32	0.0498202	1.22865e-17	0.15874	3.12477e-06
Agbl2	Agbl2	ENSMUSG00000040812	271813	2	ATP/GTP binding protein-like 2 [Source:MGI Symbol;Acc:MGI:2443254]	10163	7.84942	6.45399	4.1448	-3.32901	-1.01983	4.34884	4.59418e-06	0.0021191	0.00505278	0.458981	0.0164378	4.19579e-05	0.0127496	0.0355679	0.723532	0.121994
Msrb3	Msrb3	ENSMUSG00000051236	320183	10	methionine sulfoxide reductase B3 [Source:MGI Symbol;Acc:MGI:2443538]	9967	7.82447	6.44685	4.27575	-2.78902	-0.617917	3.40693	2.47507e-05	0.00258686	0.027879	0.652191	0.0677029	0.000180624	0.0148605	0.115183	0.850944	0.289232
Mir8091	Mir8091	ENSMUSG00000098286		19	microRNA 8091 [Source:MGI Symbol;Acc:MGI:5530957]	8616	298.156	6.43103	0.523226	-4.04469	1.86312	2.18157	4.59314e-08	0.576128	0.000104897	0.0584522	0.107434	6.91627e-07	0.731077	0.00186228	0.243614	0.367826
Ifngr2	Ifngr2	ENSMUSG00000022965	15980	16	interferon gamma receptor 2 [Source:MGI Symbol;Acc:MGI:107654]	9118	15.545	6.42087	1.9336	-5.02645	-0.53919	5.56564	0.000182969	0.177519	0.00170285	0.702722	0.00750917	0.00099168	0.338679	0.0164014	0.873766	0.0734494
Ahdc1	Ahdc1	ENSMUSG00000037692	230793	4	AT hook, DNA binding motif, containing 1 [Source:MGI Symbol;Acc:MGI:2444218]	9043	5.78498	6.40431	1.23429	-3.51971	1.65031	1.86939	8.07475e-07	0.237617	0.00171879	0.128397	0.212187	9.15697e-06	0.415354	0.0164697	0.380831	0.52291
P2rx3	P2rx3	ENSMUSG00000027071	228139	2	purinergic receptor P2X, ligand-gated ion channel, 3 [Source:MGI Symbol;Acc:MGI:1097160]	9348	8.70683	6.39511	1.79771	-3.9189	0.678505	3.24039	9.21105e-09	0.0529332	5.95659e-05	0.478198	0.0146969	1.64266e-07	0.146758	0.00115662	0.73712	0.11468
Unc79	Unc79	ENSMUSG00000021198	217843	12	unc-79 homolog (C. elegans) [Source:MGI Symbol;Acc:MGI:2684729]	8735	4.45674	6.39106	4.13656	-4.30349	-2.04899	6.35249	2.11193e-09	5.82979e-05	7.08023e-06	0.0423268	3.63186e-06	4.26757e-08	0.000725043	0.000198464	0.199791	0.000212318
Nuf2	Nuf2	ENSMUSG00000026683	66977	1	NUF2, NDC80 kinetochore complex component [Source:MGI Symbol;Acc:MGI:1914227]	8189	19.3375	6.38992	0.329044	-4.28555	1.77533	2.51022	6.74967e-13	0.643734	7.58979e-08	0.0182961	0.0152972	2.69297e-11	0.783054	4.30452e-06	0.117443	0.117387
E030003E18Rik	E030003E18Rik					10590	18.1231	6.37563	6.18306	-3.34759	-3.15502	6.50261	3.05247e-05	0.00109375	0.00831118	0.129446	0.00886921	0.000214458	0.00764998	0.0499347	0.382564	0.0824307
9630013A20Rik	9630013A20Rik					8820	20.0838	6.371	0.815993	-4.4271	1.1279	3.2992	2.50375e-10	0.318665	1.11939e-06	0.185161	0.00557409	6.39509e-09	0.503563	4.10642e-05	0.465619	0.0603411
B330016D10Rik	B330016D10Rik	ENSMUSG00000048406		4	RIKEN cDNA B330016D10 gene [Source:MGI Symbol;Acc:MGI:2444063]	10315	10.822	6.37001	4.37302	-3.79744	-1.80045	5.59789	9.36405e-05	0.00740097	0.00734317	0.277116	0.00995287	0.00055304	0.0332678	0.0460295	0.570622	0.087899
Disp2	Disp2	ENSMUSG00000040035	214240	2	dispatched RND tramsporter family member 2 [Source:MGI Symbol;Acc:MGI:2388733]	8972	5.84217	6.35562	9.18335	-2.17143	-4.99917	7.1706	1.16519e-07	2.2246e-09	0.0266738	0.00097655	7.17245e-05	1.59223e-06	1.02613e-07	0.111852	0.0162543	0.0024813
Gm7694	Gm7694	ENSMUSG00000102752	665574	1	predicted gene 7694 [Source:MGI Symbol;Acc:MGI:3649135]	9211	9.98932	6.31643	0.507146	-4.01926	1.79003	2.22923	3.93966e-09	0.556486	2.34132e-05	0.0510442	0.0766262	7.52944e-08	0.716887	0.000533235	0.223636	0.308764
Ppp1r3c	Ppp1r3c	ENSMUSG00000067279	53412	19	protein phosphatase 1, regulatory (inhibitor) subunit 3C [Source:MGI Symbol;Acc:MGI:1858229]	6962	19.7627	6.29724	2.78306	-3.99006	-0.475876	4.46593	6.54888e-16	4.15017e-05	8.73358e-09	0.473153	1.97555e-06	4.58925e-14	0.000549813	6.53942e-07	0.733169	0.000124119
Leprel1	Leprel1					9828	13.9039	6.29377	3.40698	-3.37684	-0.490053	3.86689	5.35761e-05	0.0145598	0.0119308	0.716814	0.0403863	0.000346154	0.055914	0.0639665	0.880381	0.215444
Tradd	Tradd	ENSMUSG00000031887	71609	8	TNFRSF1A-associated via death domain [Source:MGI Symbol;Acc:MGI:109200]	9521	25.2798	6.29113	3.20234	-3.69365	-0.604866	4.29852	1.29215e-08	0.00140634	0.000125423	0.548088	0.0017292	2.21061e-07	0.00936876	0.00214409	0.78776	0.0269272
Itpkb	Itpkb	ENSMUSG00000038855	320404	1	inositol 1,4,5-trisphosphate 3-kinase B [Source:MGI Symbol;Acc:MGI:109235]	10296	4.79141	6.28953	2.62499	-2.49442	1.17012	1.3243	0.000321421	0.0763542	0.0831942	0.438619	0.534067	0.00159283	0.189404	0.235433	0.709347	0.791866
Xlr3b	Xlr3b	ENSMUSG00000073125	574437	X	X-linked lymphocyte-regulated 3B [Source:MGI Symbol;Acc:MGI:109505]	8323	27.9551	6.28495	2.76365	-3.84886	-0.32755	4.17641	1.98198e-12	0.000408352	1.02297e-06	0.672241	0.000111641	7.3949e-11	0.00350952	3.82985e-05	0.859425	0.00356858
Coq3	Coq3	ENSMUSG00000028247	230027	4	coenzyme Q3 methyltransferase [Source:MGI Symbol;Acc:MGI:101813]	5282	23.9155	6.27247	1.99793	-4.14587	0.128677	4.01719	7.46847e-10	0.0181241	6.45804e-06	0.875783	0.00078615	1.70939e-08	0.0657374	0.000183068	0.948585	0.0151573
Mrpl11	Mrpl11	ENSMUSG00000024902	66419	19	mitochondrial ribosomal protein L11 [Source:MGI Symbol;Acc:MGI:2137215]	5077	23.2876	6.2693	0.52803	-4.59744	1.14383	3.45361	1.50239e-21	0.31863	2.93635e-14	0.034882	7.06641e-06	2.56627e-19	0.503563	1.14643e-11	0.177363	0.000366113
Rragd	Rragd	ENSMUSG00000028278	52187	4	Ras-related GTP binding D [Source:MGI Symbol;Acc:MGI:1098604]	9757	6.40377	6.26158	2.88288	-3.43306	-0.0543643	3.48743	6.32451e-07	0.00917461	0.00152142	0.960974	0.0226291	7.31635e-06	0.0393167	0.0150109	0.98551	0.150523
Adam4	Adam4	ENSMUSG00000072972	11498	12	a disintegrin and metallopeptidase domain 4 [Source:MGI Symbol;Acc:MGI:104731]	7452	21.5414	6.25958	-3.18757	-5.86	3.58715	2.27285	1.01775e-07	0.00179761	3.69903e-07	0.000574104	0.0937514	1.40657e-06	0.0112175	1.59204e-05	0.0110301	0.344617
Zc3hc1	Zc3hc1	ENSMUSG00000039130	232679	6	zinc finger, C3HC type 1 [Source:MGI Symbol;Acc:MGI:1916023]	6117	32.2485	6.25166	0.810854	-4.39802	1.04279	3.35523	4.02848e-19	0.152806	5.04108e-12	0.0725309	4.32058e-05	4.68503e-17	0.306172	9.84091e-10	0.272852	0.00166312
Spats1	Spats1	ENSMUSG00000023935	71020	17	spermatogenesis associated, serine-rich 1 [Source:MGI Symbol;Acc:MGI:1918270]	10587	17.1841	6.23516	-4.60551	-5.25828	5.58238	-0.324095	2.72527e-05	0.000658592	0.000138594	0.000133512	0.83631	0.000194723	0.00514634	0.00231669	0.00371387	0.938389
Acp6	Acp6	ENSMUSG00000028093	66659	3	acid phosphatase 6, lysophosphatidic [Source:MGI Symbol;Acc:MGI:1931010]	7728	28.0628	6.23515	2.16679	-3.7414	0.326963	3.41444	1.83973e-17	0.000509427	6.2356e-09	0.603146	9.58231e-05	1.7044e-15	0.00418178	4.93968e-07	0.823706	0.00316477
Suclg2	Suclg2	ENSMUSG00000061838	20917	6	succinate-Coenzyme A ligase, GDP-forming, beta subunit [Source:MGI Symbol;Acc:MGI:1306824]	10060	8.20476	6.23102	4.42722	-3.69562	-1.89182	5.58744	2.05652e-05	0.00234627	0.0038474	0.191389	0.0035425	0.000154834	0.013753	0.029433	0.473684	0.0449202
Ralyl	Ralyl	ENSMUSG00000039717	76897	3	RALY RNA binding protein-like [Source:MGI Symbol;Acc:MGI:1924147]	9781	13.305	6.22805	2.76585	-3.85254	-0.390339	4.24288	2.21097e-07	0.0100208	0.000268922	0.720216	0.00450621	2.83588e-06	0.0420485	0.00389385	0.882471	0.0522036
9230114K14Rik	9230114K14Rik	ENSMUSG00000097145		5	RIKEN cDNA 9230114K14 gene [Source:MGI Symbol;Acc:MGI:3041212]	6339	28.0221	6.21755	0.701031	-4.26079	1.25573	3.00506	7.46968e-34	0.0942502	2.75481e-20	0.00424092	7.52991e-07	5.4439e-31	0.219129	3.76445e-17	0.0465479	5.9608e-05
Gtf2h4	Gtf2h4	ENSMUSG00000001524	14885	17	general transcription factor II H, polypeptide 4 [Source:MGI Symbol;Acc:MGI:1338799]	8658	24.1825	6.20967	1.7233	-5.08628	-0.599909	5.68618	2.05125e-06	0.118725	3.87476e-05	0.584363	0.000408358	2.08404e-05	0.256788	0.000799225	0.812549	0.00949822
Chst8	Chst8	ENSMUSG00000060402	68947	7	carbohydrate (N-acetylgalactosamine 4-0) sulfotransferase 8 [Source:MGI Symbol;Acc:MGI:1916197]	6568	23.6672	6.20665	0.824654	-4.31547	1.06652	3.24896	8.1776e-19	0.148043	1.17615e-11	0.0685905	8.06201e-05	9.14762e-17	0.299199	2.14294e-09	0.265709	0.0027286
Pcdhga1	Pcdhga1	ENSMUSG00000103144	93709	18	protocadherin gamma subfamily A, 1 [Source:MGI Symbol;Acc:MGI:1935212]	10653	4.20908	6.20379	3.50938	-3.65965	-0.965237	4.62489	3.66737e-05	0.0225357	0.0040726	0.57225	0.0363113	0.000249637	0.0775206	0.030578	0.804712	0.20315
Stard5	Stard5	ENSMUSG00000046027	170460	7	StAR-related lipid transfer (START) domain containing 5 [Source:MGI Symbol;Acc:MGI:2156765]	7174	21.3352	6.20172	0.859968	-4.5452	0.796551	3.74865	5.44442e-13	0.219981	8.95518e-09	0.264326	0.000228964	2.18016e-11	0.393847	6.65973e-07	0.557186	0.00622645
Zgpat	Zgpat	ENSMUSG00000027582	229007	2	zinc finger, CCCH-type with G patch domain [Source:MGI Symbol;Acc:MGI:2449939]	8171	19.069	6.19938	2.04244	-3.4807	0.676231	2.80447	1.61838e-06	0.05801	0.00209529	0.523801	0.0622765	1.6914e-05	0.156971	0.0191359	0.770892	0.274658
Syt14	Syt14	ENSMUSG00000016200	329324	1	synaptotagmin XIV [Source:MGI Symbol;Acc:MGI:2444490]	7611	28.8829	6.18342	3.09143	-3.67732	-0.585335	4.26265	4.65776e-18	1.33759e-06	4.44759e-09	0.35341	1.03826e-06	4.75875e-16	2.9903e-05	3.76625e-07	0.638757	7.61765e-05
Fam72a	Fam72a	ENSMUSG00000055184	108900	1	family with sequence similarity 72, member A [Source:MGI Symbol;Acc:MGI:1919669]	10126	13.4075	6.16231	5.76385	-3.1065	-2.70804	5.81454	3.02048e-06	7.86219e-05	0.00547861	0.0707451	0.00171618	2.90924e-05	0.000916305	0.0376207	0.269754	0.0268291
Rcc2	Rcc2	ENSMUSG00000040945	108911	4	regulator of chromosome condensation 2 [Source:MGI Symbol;Acc:MGI:1919784]	6674	14.6697	6.16123	2.25395	-4.27385	-0.366566	4.64041	3.30953e-15	0.000758655	1.85214e-09	0.577563	9.06514e-07	2.06742e-13	0.00572763	1.74548e-07	0.808926	6.83449e-05
Fam115c	Fam115c					9751	7.57561	6.15853	0.670403	-4.63342	0.854712	3.7787	2.06473e-06	0.532103	0.000106217	0.441603	0.0160753	2.09579e-05	0.697187	0.00188196	0.711914	0.120367
Cenpv	Cenpv	ENSMUSG00000018509	73139	11	centromere protein V [Source:MGI Symbol;Acc:MGI:1920389]	7148	50.509	6.15635	2.8355	-3.97569	-0.654837	4.63052	7.41923e-17	1.3939e-05	1.7219e-09	0.306266	2.7754e-07	6.09828e-15	0.000224689	1.65121e-07	0.595946	2.58177e-05
Htra3	Htra3	ENSMUSG00000029096	78558	5	HtrA serine peptidase 3 [Source:MGI Symbol;Acc:MGI:1925808]	7188	18.6805	6.14995	2.29132	-4.20168	-0.343048	4.54473	1.51444e-12	0.00209777	9.80033e-08	0.63912	1.48498e-05	5.72867e-11	0.0126491	5.30928e-06	0.844028	0.000684972
Ccdc159	Ccdc159	ENSMUSG00000006241	67119	9	coiled-coil domain containing 159 [Source:MGI Symbol;Acc:MGI:1914369]	10092	18.83	6.14931	3.01392	-3.62729	-0.491892	4.11918	1.77113e-06	0.0103245	0.0012025	0.682566	0.0113291	1.83179e-05	0.0430957	0.0126247	0.864407	0.0963812
Gpr158	Gpr158	ENSMUSG00000045967	241263	2	G protein-coupled receptor 158 [Source:MGI Symbol;Acc:MGI:2441697]	10374	3.39029	6.14339	2.32846	-3.31784	0.497094	2.82075	3.36537e-05	0.070541	0.00866159	0.713865	0.129461	0.000232408	0.179296	0.0512661	0.879519	0.405056
Zfp783	Zfp783	ENSMUSG00000072653		6	zinc finger protein 783 [Source:MGI Symbol;Acc:MGI:3040704]	10724	4.03663	6.13635	1.86853	-3.10223	1.16559	1.93663	0.000136746	0.177363	0.0190465	0.462877	0.397441	0.000772963	0.33856	0.0890576	0.725166	0.697739
Tril	Tril	ENSMUSG00000043496	66873	6	TLR4 interactor with leucine-rich repeats [Source:MGI Symbol;Acc:MGI:1914123]	9022	7.30921	6.13395	2.47493	-4.20429	-0.545279	4.74957	1.44058e-08	0.0091389	1.74768e-05	0.563278	0.000358052	2.44162e-07	0.039256	0.000416245	0.798879	0.00858382
1700010I14Rik	1700010I14Rik	ENSMUSG00000023873	66931	17	RIKEN cDNA 1700010I14 gene [Source:MGI Symbol;Acc:MGI:1914181]	8513	23.001	6.13171	1.45569	-4.11644	0.559585	3.55686	2.79769e-10	0.0719326	2.60614e-06	0.495231	0.00214903	6.98273e-09	0.181567	8.63342e-05	0.750675	0.031255
Klhl32	Klhl32	ENSMUSG00000040387	212390	4	kelch-like 32 [Source:MGI Symbol;Acc:MGI:3612790]	10512	9.37963	6.1154	3.47964	-3.13512	-0.499364	3.63449	4.78171e-05	0.0145808	0.0131926	0.740943	0.0689891	0.000313391	0.055965	0.0684875	0.892139	0.291643
Actr3b	Actr3b	ENSMUSG00000056367	242894	5	ARP3 actin-related protein 3B [Source:MGI Symbol;Acc:MGI:2661120]	9273	19.8846	6.11205	2.74223	-4.83507	-1.46526	6.30033	8.31085e-06	0.0261571	0.000167594	0.228006	0.000291924	7.04842e-05	0.0865545	0.00271428	0.518851	0.00743895
1110019D14Rik	1110019D14Rik	ENSMUSG00000097616		6	RIKEN cDNA 1110019D14 gene [Source:MGI Symbol;Acc:MGI:1923561]	6840	36.3342	6.10867	2.50396	-4.13909	-0.534377	4.67346	2.85417e-16	0.000116146	9.08212e-10	0.402031	2.70496e-07	2.08073e-14	0.0012634	9.27904e-08	0.678136	2.54919e-05
Vamp8	Vamp8	ENSMUSG00000050732;ENSMUSG00000103205	22320	6	vesicle-associated membrane protein 8 [Source:MGI Symbol;Acc:MGI:1336882]	7162	66.2947	6.10844	1.55998	-4.35147	0.196994	4.15448	1.02102e-13	0.0230859	6.92486e-09	0.774439	2.45679e-05	4.75109e-12	0.0788425	5.40733e-07	0.905534	0.0010251
Mpg	Mpg	ENSMUSG00000020287	268395	11	N-methylpurine-DNA glycosylase [Source:MGI Symbol;Acc:MGI:97073]	6057	33.9283	6.09279	0.365992	-4.35212	1.37468	2.97744	1.43607e-10	0.632954	6.07098e-07	0.0801176	0.00720469	3.81045e-09	0.774681	2.43106e-05	0.290593	0.0716096
Rras	Rras	ENSMUSG00000038387	20130	7	related RAS viral (r-ras) oncogene [Source:MGI Symbol;Acc:MGI:98179]	9977	32.0794	6.09238	1.15289	-4.26619	0.673292	3.5929	2.03535e-06	0.285406	0.000236094	0.548662	0.0220808	2.06981e-05	0.469676	0.00352111	0.787964	0.14773
Vav2	Vav2	ENSMUSG00000009621	22325	2	vav 2 oncogene [Source:MGI Symbol;Acc:MGI:102718]	10467	6.64235	6.0918	6.57983	-2.27408	-2.76211	5.0362	8.50477e-05	0.000226681	0.0713698	0.137656	0.0256818	0.000508611	0.00217949	0.214168	0.397089	0.161911
Cmbl	Cmbl	ENSMUSG00000022235	69574	15	carboxymethylenebutenolidase-like (Pseudomonas) [Source:MGI Symbol;Acc:MGI:1916824]	7684	47.5909	6.09177	1.40278	-4.31793	0.371063	3.94686	3.32953e-14	0.0366375	3.82614e-09	0.584691	4.26808e-05	1.73326e-12	0.111473	3.31963e-07	0.812645	0.00164872
5330413P13Rik	5330413P13Rik	ENSMUSG00000086822		2	RIKEN cDNA 5330413P13 gene [Source:MGI Symbol;Acc:MGI:3041161]	9620	9.64922	6.0896	1.14188	-3.47821	1.46951	2.0087	2.62133e-06	0.281615	0.00213355	0.1838	0.18932	2.58166e-05	0.465663	0.0194043	0.463827	0.493007
Arvcf	Arvcf	ENSMUSG00000000325;ENSMUSG00000098615	11877	16	armadillo repeat gene deleted in velo-cardio-facial syndrome [Source:MGI Symbol;Acc:MGI:109620]	6953	11.6761	6.08712	-0.85856	-4.77014	2.17555	2.59459	1.32143e-15	0.166288	2.0643e-11	0.000820383	0.00360325	8.80843e-14	0.324677	3.41923e-09	0.0143956	0.0454427
4930570G19Rik	4930570G19Rik	ENSMUSG00000085084		3	RIKEN cDNA 4930570G19 gene [Source:MGI Symbol;Acc:MGI:1923158]	7665	50.1961	6.07686	2.36758	-3.76787	-0.058596	3.82647	1.81529e-13	0.000864168	2.8461e-07	0.933423	0.000113207	7.87489e-12	0.00634885	1.26994e-05	0.974426	0.00359653
Slc6a11	Slc6a11	ENSMUSG00000030307	243616	6	solute carrier family 6 (neurotransmitter transporter, GABA), member 11 [Source:MGI Symbol;Acc:MGI:95630]	8624	10.3883	6.07433	1.32293	-4.49234	0.259058	4.23329	4.03654e-07	0.183976	4.93354e-05	0.795244	0.0032824	4.81741e-06	0.346527	0.000982395	0.913674	0.042718
Neu3	Neu3	ENSMUSG00000035239	50877	7	neuraminidase 3 [Source:MGI Symbol;Acc:MGI:1355305]	6992	16.3584	6.07173	5.12551	-3.14818	-2.20196	5.35014	1.70457e-27	6.40711e-19	5.35825e-11	0.00010987	3.70795e-13	5.3241e-25	1.29708e-16	7.60732e-09	0.00316914	1.22834e-10
Rps14	Rps14	ENSMUSG00000024608	20044	18	ribosomal protein S14 [Source:MGI Symbol;Acc:MGI:98107]	7119	90.362	6.06074	-0.476889	-4.48166	2.05596	2.42571	2.3787e-18	0.397331	2.28381e-12	0.000543576	0.00288506	2.50038e-16	0.578493	4.80126e-10	0.0105925	0.0388417
Zswim7	Zswim7	ENSMUSG00000014243	69747	11	zinc finger SWIM-type containing 7 [Source:MGI Symbol;Acc:MGI:1916997]	7502	69.0846	6.05839	-0.81663	-4.45308	2.42193	2.03115	9.60805e-19	0.143578	1.50026e-12	4.74452e-05	0.0115281	1.05035e-16	0.293272	3.81414e-10	0.00162592	0.0972417
Capn10	Capn10	ENSMUSG00000026270	23830	1	calpain 10 [Source:MGI Symbol;Acc:MGI:1344392]	7118	18.3091	6.05515	-0.0927065	-4.42006	1.7278	2.69226	3.5848e-11	0.900207	1.55772e-07	0.0245848	0.0117788	1.09162e-09	0.947166	7.82971e-06	0.143339	0.0984449
Mgst3	Mgst3	ENSMUSG00000026688	66447	1	microsomal glutathione S-transferase 3 [Source:MGI Symbol;Acc:MGI:1913697]	6717	81.0105	6.05284	1.65933	-4.93687	-0.543363	5.48023	8.29138e-07	0.105382	2.1924e-05	0.590072	0.000257006	9.32524e-06	0.237045	0.000505655	0.815817	0.00675381
Col5a3	Col5a3	ENSMUSG00000004098	53867	9	collagen, type V, alpha 3 [Source:MGI Symbol;Acc:MGI:1858212]	9743	5.31468	6.0453	3.13044	-1.70981	1.20505	0.504766	0.000356197	0.0337533	0.217038	0.397668	0.803159	0.00173759	0.104412	0.427737	0.67467	0.924573
Arxes1	Arxes1	ENSMUSG00000048355	76219	X	adipocyte-related X-chromosome expressed sequence 1 [Source:MGI Symbol;Acc:MGI:1923469]	7639	31.7651	6.04379	1.72293	-4.21413	0.106717	4.10742	2.64047e-14	0.0103427	5.41797e-09	0.874195	1.81798e-05	1.42195e-12	0.0431533	4.45333e-07	0.947992	0.000791798
Snora16a	Snora16a	ENSMUSG00000065097;ENSMUSG00000105911		4	small nucleolar RNA, H/ACA box 16A [Source:MGI Symbol;Acc:MGI:4361141]	9677	244.01	6.0396	0.39671	-4.23138	1.41151	2.81987	3.50177e-06	0.70919	0.000350611	0.204067	0.0692681	3.30868e-05	0.82936	0.0048031	0.488902	0.292145
AI854517	AI854517					10537	5.32262	6.03836	-0.672038	-3.01814	3.69227	-0.67413	0.00219623	0.669533	0.0718516	0.0405223	0.746063	0.00798177	0.802559	0.21488	0.195408	0.901211
Mamdc4	Mamdc4	ENSMUSG00000026941	381352	2	MAM domain containing 4 [Source:MGI Symbol;Acc:MGI:2685841]	10045	7.10044	6.00653	2.23004	-1.54963	2.22686	-0.677232	0.00113515	0.149033	0.302368	0.161536	0.741609	0.0045944	0.300707	0.521206	0.432716	0.898893
Ccdc96	Ccdc96	ENSMUSG00000050677	66717	5	coiled-coil domain containing 96 [Source:MGI Symbol;Acc:MGI:1913967]	10425	6.37179	6.00274	3.65509	-2.13442	0.213227	1.9212	0.00050114	0.0196014	0.13144	0.890925	0.370388	0.00233027	0.0696852	0.313428	0.955158	0.677003
Sgsm2	Sgsm2	ENSMUSG00000038351	97761	11	small G protein signaling modulator 2 [Source:MGI Symbol;Acc:MGI:2144695]	8916	8.75596	5.98725	1.17545	-3.98006	0.831742	3.14832	1.57196e-10	0.131609	2.27228e-06	0.29994	0.00501408	4.13366e-09	0.276417	7.76268e-05	0.591548	0.0561618
Gga1	Gga1	ENSMUSG00000033128	106039	15	golgi associated, gamma adaptin ear containing, ARF binding protein 1 [Source:MGI Symbol;Acc:MGI:2146207]	6471	19.3535	5.98596	-0.0307649	-4.3927	1.62402	2.76869	5.21168e-20	0.953879	2.98886e-13	0.00338087	0.00032387	6.94806e-18	0.976891	9.33548e-11	0.0394869	0.00793845
Ppan	Ppan	ENSMUSG00000004100	235036	9	peter pan homolog (Drosophila) [Source:MGI Symbol;Acc:MGI:2178445]	10283	15.562	5.98569	2.3036	-3.04025	0.64184	2.39841	6.81624e-05	0.0752355	0.0178967	0.629795	0.193304	0.000422901	0.187667	0.0852863	0.839262	0.499487
Lin9	Lin9	ENSMUSG00000058729	72568	1	lin-9 homolog (C. elegans) [Source:MGI Symbol;Acc:MGI:1919818]	9573	10.7006	5.97882	2.01873	-4.13702	-0.176929	4.31395	5.96932e-05	0.113143	0.00229096	0.888459	0.0172197	0.000379399	0.24849	0.0203561	0.954653	0.125581
Sept11	Sept11	ENSMUSG00000058013	52398	5	septin 11 [Source:MGI Symbol;Acc:MGI:1277214]	6566	11.6631	5.97694	-0.208415	-4.26774	1.91762	2.35012	1.06813e-24	0.660448	1.12213e-15	0.000127913	0.000614748	2.43267e-22	0.796648	5.11131e-13	0.00359471	0.0125851
Nebl	Nebl	ENSMUSG00000053702	74103	2	nebulette [Source:MGI Symbol;Acc:MGI:1921353]	10363	8.3766	5.96417	4.83193	-3.08427	-1.95202	5.03629	1.54692e-05	0.000921763	0.00861108	0.197507	0.00839241	0.000121487	0.0066689	0.0510501	0.479901	0.0793793
Hist1h3e	Hist1h3e	ENSMUSG00000069273	319151	13	histone cluster 1, H3e [Source:MGI Symbol;Acc:MGI:2448326]	10534	45.7318	5.95777	2.44051	-2.27048	1.24678	1.0237	0.000557245	0.0979309	0.109516	0.421244	0.646206	0.00254417	0.225054	0.279662	0.694891	0.853263
Csf2ra	Csf2ra	ENSMUSG00000059326	12982	19	colony stimulating factor 2 receptor, alpha, low-affinity (granulocyte-macrophage) [Source:MGI Symbol;Acc:MGI:1339754]	10433	12.8114	5.95267	5.10996	-2.63647	-1.79376	4.43024	3.08472e-05	0.000708978	0.0264683	0.253187	0.0248677	0.000216168	0.00546968	0.111431	0.545602	0.159632
Hddc3	Hddc3	ENSMUSG00000030532	68695	7	HD domain containing 3 [Source:MGI Symbol;Acc:MGI:1915945]	7200	59.861	5.95234	0.951546	-4.52511	0.475682	4.04943	1.4023e-09	0.24014	7.71025e-07	0.55909	0.000580968	2.97092e-08	0.418211	2.98895e-05	0.79583	0.0121636
Dusp23	Dusp23	ENSMUSG00000026544	68440	1	dual specificity phosphatase 23 [Source:MGI Symbol;Acc:MGI:1915690]	7877	34.4109	5.95016	2.99703	-3.5055	-0.552366	4.05786	2.32133e-15	8.73168e-06	1.19681e-07	0.403632	1.03363e-05	1.50158e-13	0.000151756	6.22675e-06	0.67916	0.000499984
Bzrap1	Bzrap1					10500	2.89315	5.94283	1.10929	-3.01108	1.82247	1.1886	0.000255686	0.406415	0.0293016	0.209651	0.564547	0.00131413	0.587027	0.118815	0.495762	0.811202
Bai2	Bai2					6126	11.4639	5.93283	0.68585	-4.521	0.725976	3.79502	5.89281e-11	0.354924	8.8743e-08	0.331729	0.000432524	1.74109e-09	0.537922	4.97507e-06	0.62097	0.00991269
Mns1	Mns1	ENSMUSG00000032221	17427	9	meiosis-specific nuclear structural protein 1 [Source:MGI Symbol;Acc:MGI:107933]	7755	27.9657	5.93025	-0.103926	-4.31683	1.71735	2.59948	1.16243e-16	0.859131	5.09688e-11	0.00521454	0.00219399	9.20845e-15	0.923593	7.33145e-09	0.0531271	0.0317258
Rtp4	Rtp4	ENSMUSG00000033355	67775	16	receptor transporter protein 4 [Source:MGI Symbol;Acc:MGI:1915025]	7383	30.5858	5.9253	3.35374	-4.50571	-1.93415	6.43986	2.50589e-07	0.00132996	2.60202e-05	0.054187	9.45777e-06	3.15603e-06	0.00893617	0.000582896	0.231848	0.000465731
Mecr	Mecr	ENSMUSG00000028910	26922	4	mitochondrial trans-2-enoyl-CoA reductase [Source:MGI Symbol;Acc:MGI:1349441]	9340	27.9801	5.9173	2.16872	-3.52326	0.225324	3.29794	1.53108e-08	0.0164431	0.000133678	0.804791	0.00936821	2.58298e-07	0.0613304	0.00224825	0.918848	0.0850609
Gm5126	Gm5126					9975	14.3577	5.90322	0.5944	-3.33842	1.97039	1.36803	2.48138e-05	0.602409	0.00640213	0.105307	0.413927	0.000180843	0.751259	0.0418339	0.341042	0.711836
Tbl3	Tbl3	ENSMUSG00000040688	213773	17	transducin (beta)-like 3 [Source:MGI Symbol;Acc:MGI:2384863]	7082	21.6653	5.88944	0.0199788	-4.42798	1.44148	2.98651	2.00234e-15	0.973749	1.23051e-10	0.021809	0.000688841	1.31865e-13	0.986838	1.58259e-08	0.132601	0.013792
Zmynd19	Zmynd19	ENSMUSG00000026974	67187	2	zinc finger, MYND domain containing 19 [Source:MGI Symbol;Acc:MGI:1914437]	7693	41.589	5.88508	0.0105207	-4.24411	1.63045	2.61365	3.27699e-17	0.985329	3.27472e-11	0.00654234	0.00161955	2.88904e-15	0.992593	5.04215e-09	0.0613891	0.0256221
Rab34	Rab34	ENSMUSG00000002059	19376	11	RAB34, member RAS oncogene family [Source:MGI Symbol;Acc:MGI:104606]	8761	31.2267	5.88304	-0.966101	-4.14509	2.70406	1.44103	1.12361e-11	0.174263	1.5233e-07	0.000411955	0.159215	3.71098e-10	0.334683	7.70961e-06	0.00869399	0.452817
2610306M01Rik	2610306M01Rik	ENSMUSG00000100164		6	RIKEN cDNA 2610306M01 gene [Source:MGI Symbol;Acc:MGI:1914420]	9879	30.7712	5.87341	1.64346	-2.9712	1.25876	1.71244	2.72271e-05	0.16026	0.0138699	0.295205	0.305147	0.000194667	0.316206	0.0709525	0.588044	0.618156
Barx2	Barx2	ENSMUSG00000032033	12023	9	BarH-like homeobox 2 [Source:MGI Symbol;Acc:MGI:109617]	7341	29.9957	5.86978	1.54342	-3.80444	0.521919	3.28252	2.28783e-22	0.00255825	2.0604e-12	0.317447	6.60898e-06	4.23908e-20	0.0147186	4.59143e-10	0.60625	0.000347353
Fam13a	Fam13a	ENSMUSG00000037709	58909	6	family with sequence similarity 13, member A [Source:MGI Symbol;Acc:MGI:1889842]	7324	12.3047	5.86047	0.170256	-4.47436	1.21586	3.2585	1.36416e-12	0.801749	6.38719e-09	0.0808736	0.000932862	5.21433e-11	0.886489	5.02336e-07	0.292075	0.0170822
Rnmtl1	Rnmtl1					6970	34.4596	5.85866	1.30518	-4.54647	0.00701234	4.53946	3.87012e-07	0.174086	2.66448e-05	0.994123	0.00114581	4.63905e-06	0.334465	0.000592034	0.998853	0.0197446
Npr2	Npr2	ENSMUSG00000028469	230103	4	natriuretic peptide receptor 2 [Source:MGI Symbol;Acc:MGI:97372]	10833	4.21543	5.84346	3.01428	-3.33477	-0.505589	3.84036	0.000193091	0.0623237	0.0107363	0.784595	0.124725	0.00103779	0.164611	0.0590416	0.909468	0.398099
Tlr3	Tlr3	ENSMUSG00000031639	142980	8	toll-like receptor 3 [Source:MGI Symbol;Acc:MGI:2156367]	8773	9.6017	5.82703	-0.353572	-3.6711	2.50951	1.16159	1.44589e-06	0.719323	0.000719439	0.0169417	0.41177	1.52278e-05	0.835935	0.00852103	0.11236	0.710796
Rab40b	Rab40b	ENSMUSG00000025170	217371	11	Rab40B, member RAS oncogene family [Source:MGI Symbol;Acc:MGI:2183451]	7597	25.7675	5.81938	2.32542	-4.26722	-0.773263	5.04048	1.31679e-07	0.0150235	2.93996e-05	0.405871	0.000200906	1.78599e-06	0.0572455	0.000631428	0.681041	0.0056028
Kdelc2	Kdelc2	ENSMUSG00000034487	68304	9	KDEL (Lys-Asp-Glu-Leu) containing 2 [Source:MGI Symbol;Acc:MGI:1923765]	5706	17.4724	5.80371	0.225209	-4.58139	0.997111	3.58428	1.98174e-11	0.750463	1.8734e-08	0.165439	0.000508358	6.29778e-10	0.854035	1.28e-06	0.438125	0.0110705
Coq4	Coq4	ENSMUSG00000026798	227683	2	coenzyme Q4 [Source:MGI Symbol;Acc:MGI:1098826]	7539	25.7668	5.80112	-0.189044	-4.35675	1.63342	2.72333	6.96199e-11	0.795319	1.37072e-07	0.0305331	0.00970203	2.00814e-09	0.882057	7.00221e-06	0.164377	0.0866525
Zc3h3	Zc3h3	ENSMUSG00000075600	223642	15	zinc finger CCCH type containing 3 [Source:MGI Symbol;Acc:MGI:2663721]	10426	7.25317	5.79898	2.88044	-3.3284	-0.409855	3.73825	2.0208e-05	0.0233282	0.00477477	0.757962	0.0354827	0.000153093	0.0794962	0.034273	0.900434	0.200671
Hdx	Hdx	ENSMUSG00000034551	245596	X	highly divergent homeobox [Source:MGI Symbol;Acc:MGI:2685226]	6794	13.9321	5.7936	-1.15472	-4.39839	2.54993	1.84847	5.20991e-18	0.0372806	1.70019e-12	1.34739e-05	0.0190189	5.27359e-16	0.113209	4.04054e-10	0.000589902	0.13356
Hmgcll1	Hmgcll1	ENSMUSG00000007908	208982	9	3-hydroxymethyl-3-methylglutaryl-Coenzyme A lyase-like 1 [Source:MGI Symbol;Acc:MGI:2446108]	9882	8.71804	5.79284	4.17641	-2.34411	-0.727678	3.07178	5.21334e-05	0.00202593	0.052406	0.568978	0.0800736	0.000338057	0.0123178	0.175791	0.802699	0.31613
C2cd2l	C2cd2l	ENSMUSG00000032120	71764	9	C2 calcium-dependent domain containing 2-like [Source:MGI Symbol;Acc:MGI:1919014]	5652	14.8644	5.79023	2.16776	-3.54128	0.081191	3.46009	8.62269e-18	0.000176645	4.29821e-09	0.885743	1.79081e-05	8.56939e-16	0.0017798	3.67094e-07	0.953796	0.000783086
Map3k15	Map3k15	ENSMUSG00000031303	270672	X	mitogen-activated protein kinase kinase kinase 15 [Source:MGI Symbol;Acc:MGI:2448588]	10213	5.64616	5.78969	-1.0407	-1.80918	5.0212	-3.21202	0.00210717	0.495119	0.244485	0.00585483	0.14804	0.00770562	0.666321	0.457577	0.0573008	0.437397
D130020L05Rik	D130020L05Rik	ENSMUSG00000097121		12	RIKEN cDNA D130020L05 gene [Source:MGI Symbol;Acc:MGI:2450270]	8367	14.2019	5.76961	1.47362	-4.52439	-0.228407	4.7528	1.33652e-05	0.187013	0.000281555	0.836357	0.00335843	0.000106726	0.350714	0.00404995	0.931424	0.0432442
Lrrn4cl	Lrrn4cl	ENSMUSG00000071656	68852	19	LRRN4 C-terminal like [Source:MGI Symbol;Acc:MGI:1916102]	10327	9.16939	5.76179	-3.91998	-4.394	5.28777	-0.893772	6.14887e-05	0.00249109	0.000880183	0.000182356	0.595733	0.000388552	0.014386	0.00989934	0.00478062	0.829152
Pcsk1n	Pcsk1n	ENSMUSG00000039278	30052	X	proprotein convertase subtilisin/kexin type 1 inhibitor [Source:MGI Symbol;Acc:MGI:1353431]	8941	18.3929	5.75041	0.319967	-3.27545	2.155	1.12045	5.8395e-06	0.757381	0.00352133	0.0487928	0.452085	5.19004e-05	0.857234	0.0276348	0.2176	0.739473
Zfp811	Zfp811	ENSMUSG00000055202	240063	17	zinc finger protein 811 [Source:MGI Symbol;Acc:MGI:2682944]	7004	15.5072	5.72927	0.0342876	-4.4933	1.20169	3.29161	4.63835e-11	0.961821	3.96212e-08	0.100982	0.00154748	1.38542e-09	0.980712	2.48956e-06	0.332583	0.0248416
Chgb	Chgb	ENSMUSG00000027350	12653	2	chromogranin B [Source:MGI Symbol;Acc:MGI:88395]	10129	10.5646	5.71777	2.09903	-3.11025	0.50849	2.60176	2.37272e-05	0.0734348	0.00831332	0.670529	0.116574	0.000174435	0.18461	0.0499347	0.85834	0.383507
Pdzd4	Pdzd4	ENSMUSG00000002006	245469	X	PDZ domain containing 4 [Source:MGI Symbol;Acc:MGI:2443483]	10410	5.95735	5.70921	2.45792	-2.822	0.429289	2.39271	0.000212711	0.070226	0.0325983	0.757562	0.213324	0.00112936	0.178754	0.127592	0.900434	0.524529
1700003M07Rik	1700003M07Rik	ENSMUSG00000085389		4	RIKEN cDNA 1700003M07 gene [Source:MGI Symbol;Acc:MGI:1919475]	9723	12.6416	5.70788	3.35951	-4.00347	-1.6551	5.65857	0.00244415	0.0516801	0.020753	0.315907	0.0171669	0.00873469	0.144493	0.0946781	0.605028	0.12528
Ppp4r1l-ps	Ppp4r1l-ps	ENSMUSG00000055897		2	protein phosphatase 4, regulatory subunit 1-like, pseudogene [Source:MGI Symbol;Acc:MGI:1924560]	6490	12.2171	5.70301	0.113833	-4.39657	1.19261	3.20395	1.05977e-05	0.914509	0.00029674	0.268698	0.0371733	8.71539e-05	0.955045	0.00421324	0.561324	0.205449
Pcdhga6	Pcdhga6	ENSMUSG00000103793	93714	18	protocadherin gamma subfamily A, 6 [Source:MGI Symbol;Acc:MGI:1935218]	7260	11.3146	5.69481	1.34904	-4.50933	-0.163557	4.67289	7.28714e-08	0.129861	6.16156e-06	0.853097	0.000305631	1.04353e-06	0.273797	0.000177726	0.940027	0.00762821
Ccl22	Ccl22	ENSMUSG00000031779	20299	8	chemokine (C-C motif) ligand 22 [Source:MGI Symbol;Acc:MGI:1306779]	9505	19.6511	5.69335	3.73779	-3.65391	-1.69835	5.35226	7.97093e-07	0.000759439	0.000430008	0.117165	0.000316728	9.0621e-06	0.0057296	0.00564327	0.361312	0.00780159
D430020J02Rik	D430020J02Rik					8801	14.8765	5.68816	1.24368	-3.75709	0.687386	3.06971	4.56272e-11	0.0886622	1.48913e-06	0.357366	0.00334035	1.36656e-09	0.209932	5.37266e-05	0.64169	0.043113
Frat2	Frat2	ENSMUSG00000047604	212398	19	frequently rearranged in advanced T cell lymphomas 2 [Source:MGI Symbol;Acc:MGI:2673967]	5927	28.8242	5.68406	2.1611	-3.70563	-0.182671	3.8883	4.4556e-14	0.00087504	5.81743e-08	0.772776	1.96163e-05	2.24464e-12	0.00640261	3.5136e-06	0.905534	0.000840963
Srek1ip1	Srek1ip1	ENSMUSG00000021716	67288	13	splicing regulatory glutamine/lysine-rich protein 1interacting protein 1 [Source:MGI Symbol;Acc:MGI:1914538]	3948	47.579	5.6747	1.21737	-3.87491	0.58242	3.29249	1.29951e-32	0.00230781	6.58674e-19	0.145977	8.3017e-09	6.45739e-30	0.0136005	7.20062e-16	0.408786	1.14879e-06
Ckap2l	Ckap2l	ENSMUSG00000048327	70466	2	cytoskeleton associated protein 2-like [Source:MGI Symbol;Acc:MGI:1917716]	8173	15.3914	5.67251	0.705989	-3.87131	1.09522	2.77609	5.44454e-15	0.244079	4.49154e-09	0.0806919	0.00149073	3.32512e-13	0.423334	3.76625e-07	0.291804	0.024001
Rad9b	Rad9b	ENSMUSG00000038569	231724	5	RAD9 checkpoint clamp component B [Source:MGI Symbol;Acc:MGI:2385231]	9696	21.1108	5.66975	5.23579	-2.08026	-1.64631	3.72657	4.06975e-05	0.000169093	0.0738562	0.198739	0.0312292	0.000273283	0.00172116	0.21851	0.481305	0.184241
Pla2g6	Pla2g6	ENSMUSG00000042632	53357	15	phospholipase A2, group VI [Source:MGI Symbol;Acc:MGI:1859152]	6458	18.7218	5.66839	0.974513	-4.17512	0.518753	3.65637	6.8407e-11	0.177951	2.28999e-07	0.474547	0.000466278	1.98743e-09	0.33915	1.04745e-05	0.733897	0.0104668
Fkbp5	Fkbp5	ENSMUSG00000024222	14229	17	FK506 binding protein 5 [Source:MGI Symbol;Acc:MGI:104670]	6604	15.1332	5.66786	-0.0819234	-4.20452	1.54527	2.65925	1.48591e-16	0.884929	4.14093e-11	0.00835045	0.00113418	1.15206e-14	0.937045	6.11739e-09	0.0704376	0.0196185
Gins2	Gins2	ENSMUSG00000031821	272551	8	GINS complex subunit 2 (Psf2 homolog) [Source:MGI Symbol;Acc:MGI:1921019]	10380	23.8003	5.66362	2.76398	-2.44124	0.458406	1.98283	0.000296157	0.046521	0.065182	0.743812	0.307044	0.00148786	0.133951	0.202655	0.893338	0.619659
Erp27	Erp27	ENSMUSG00000030219	69187	6	endoplasmic reticulum protein 27 [Source:MGI Symbol;Acc:MGI:1916437]	9834	34.8722	5.65554	-0.514628	-3.90304	2.26713	1.63591	1.32057e-06	0.594516	0.000242586	0.028373	0.245585	1.40982e-05	0.744984	0.00359343	0.156957	0.560605
Kdm4d	Kdm4d	ENSMUSG00000053914	244694	9	lysine (K)-specific demethylase 4D [Source:MGI Symbol;Acc:MGI:3606484]	8846	15.4123	5.64873	1.20005	-3.8841	0.56458	3.31952	8.11127e-07	0.212384	0.000209324	0.560051	0.0161785	9.17934e-06	0.384202	0.00320344	0.796472	0.120808
Gm5148	Gm5148	ENSMUSG00000058174	381438	3	predicted gene 5148 [Source:MGI Symbol;Acc:MGI:3646006]	7851	41.183	5.64505	1.69426	-3.78065	0.170149	3.6105	1.33849e-14	0.00716771	1.34996e-08	0.787869	5.34591e-05	7.58155e-13	0.0325675	9.64558e-07	0.911234	0.00197438
2310011J03Rik	2310011J03Rik	ENSMUSG00000020133	66374	10	RIKEN cDNA 2310011J03 gene [Source:MGI Symbol;Acc:MGI:1913624]	7261	33.0108	5.64047	0.750202	-3.74191	1.14836	2.59354	3.57822e-21	0.132496	4.52191e-12	0.0260381	0.000299618	6.01801e-19	0.277476	8.98791e-10	0.148564	0.00756449
Abhd14b	Abhd14b	ENSMUSG00000042073	76491	9	abhydrolase domain containing 14b [Source:MGI Symbol;Acc:MGI:1923741]	7504	35.9476	5.63191	0.158333	-4.01998	1.4536	2.56638	5.68349e-16	0.783505	3.34246e-10	0.0151136	0.00204212	4.03454e-14	0.875026	3.80622e-08	0.103773	0.0300463
Crip1	Crip1	ENSMUSG00000006360	12925	12	cysteine-rich protein 1 (intestinal) [Source:MGI Symbol;Acc:MGI:88501]	10438	54.8214	5.62731	-1.23239	-4.11903	2.74067	1.37836	2.55794e-05	0.273332	0.000732229	0.0253176	0.41497	0.000185659	0.45675	0.00863002	0.146286	0.712382
Map1s	Map1s	ENSMUSG00000019261	270058	8	microtubule-associated protein 1S [Source:MGI Symbol;Acc:MGI:2443304]	7747	15.6888	5.6235	-1.35957	-4.37691	2.60617	1.77074	1.17636e-13	0.0324347	7.15107e-10	9.90257e-05	0.0490055	5.35833e-12	0.101259	7.44528e-08	0.00291008	0.241851
Ifit1	Ifit1	ENSMUSG00000034459	15957	19	interferon-induced protein with tetratricopeptide repeats 1 [Source:MGI Symbol;Acc:MGI:99450]	9710	11.6984	5.62229	1.11366	-3.63031	0.878321	2.75199	0.000791891	0.42631	0.0167405	0.534412	0.170438	0.00341632	0.604856	0.0813726	0.777504	0.46971
Tgds	Tgds	ENSMUSG00000022130	76355	14	TDP-glucose 4,6-dehydratase [Source:MGI Symbol;Acc:MGI:1923605]	6912	24.6728	5.61735	-1.08041	-4.37225	2.32551	2.04675	2.65336e-10	0.14415	1.66516e-07	0.00259293	0.0512601	6.71448e-09	0.294014	8.27434e-06	0.0325959	0.248393
Prkag1	Prkag1	ENSMUSG00000067713	19082	15	protein kinase, AMP-activated, gamma 1 non-catalytic subunit [Source:MGI Symbol;Acc:MGI:108411]	5646	39.5926	5.61412	-0.0201009	-4.28877	1.34546	2.94331	1.00596e-12	0.97529	6.05441e-09	0.0428081	0.001699	3.94165e-11	0.987634	4.86668e-07	0.200849	0.0266478
Bahd1	Bahd1	ENSMUSG00000040007	228536	2	bromo adjacent homology domain containing 1 [Source:MGI Symbol;Acc:MGI:2139371]	8519	10.3833	5.6075	-0.842669	-4.05555	2.39461	1.66094	1.30269e-12	0.19961	2.52561e-08	0.000604004	0.0781254	5.01443e-11	0.367611	1.68354e-06	0.0114041	0.312
Bckdk	Bckdk	ENSMUSG00000030802	12041	7	branched chain ketoacid dehydrogenase kinase [Source:MGI Symbol;Acc:MGI:1276121]	6457	20.5196	5.60262	0.310473	-4.09241	1.19973	2.89268	2.79333e-10	0.671858	6.83825e-07	0.108635	0.00625113	6.98273e-09	0.80354	2.71839e-05	0.346732	0.0653052
Stx1a	Stx1a	ENSMUSG00000007207	20907	5	syntaxin 1A (brain) [Source:MGI Symbol;Acc:MGI:109355]	10190	13.5043	5.58964	3.70125	-2.68723	-0.798841	3.48607	5.80368e-05	0.00495568	0.0247083	0.536295	0.0470895	0.000370373	0.0247646	0.10666	0.778383	0.235521
Trim62	Trim62	ENSMUSG00000041000	67525	4	tripartite motif-containing 62 [Source:MGI Symbol;Acc:MGI:1914775]	10037	8.64406	5.5714	0.0741108	-3.86367	1.63362	2.23004	0.00113834	0.95827	0.0138296	0.2674	0.27863	0.00460347	0.979175	0.0708458	0.560178	0.594569
Pcdhgb4	Pcdhgb4	ENSMUSG00000103585	93701	18	protocadherin gamma subfamily B, 4 [Source:MGI Symbol;Acc:MGI:1935173]	9713	7.76292	5.56828	0.0722167	-3.67557	1.8205	1.85506	8.88608e-07	0.938717	0.000334647	0.0667643	0.174167	9.93279e-06	0.968484	0.00465532	0.261692	0.474339
Nudt8	Nudt8	ENSMUSG00000024869;ENSMUSG00000110949	;66387	19	nudix (nucleoside diphosphate linked moiety X)-type motif 8 [Source:MGI Symbol;Acc:MGI:1913637]	8817	54.7433	5.56591	0.221879	-3.95313	1.3909	2.56223	1.33086e-09	0.771428	2.81108e-06	0.0792878	0.0203194	2.85274e-08	0.865748	9.20083e-05	0.288515	0.139793
Gfod2	Gfod2	ENSMUSG00000013150	70575	8	glucose-fructose oxidoreductase domain containing 2 [Source:MGI Symbol;Acc:MGI:1917825]	10553	10.9246	5.56486	3.43684	-3.31769	-1.18967	4.50736	4.67236e-05	0.0129268	0.00547744	0.415388	0.0170752	0.000306761	0.051226	0.0376207	0.689976	0.124777
Slc25a33	Slc25a33	ENSMUSG00000028982	70556	4	solute carrier family 25, member 33 [Source:MGI Symbol;Acc:MGI:1917806]	9243	20.8173	5.55766	0.294465	-3.94831	1.31489	2.63342	1.45412e-07	0.738095	4.85856e-05	0.149423	0.0387998	1.9601e-06	0.84739	0.000969229	0.414269	0.211656
Nhlrc3	Nhlrc3	ENSMUSG00000042997	212114	3	NHL repeat containing 3 [Source:MGI Symbol;Acc:MGI:2444520]	10095	18.9994	5.55659	1.93522	-3.06877	0.552609	2.51616	2.79697e-05	0.0922237	0.00839637	0.636339	0.121738	0.000198807	0.215794	0.0502403	0.8429	0.392701
Cacng5	Cacng5	ENSMUSG00000040373	140723	11	calcium channel, voltage-dependent, gamma subunit 5 [Source:MGI Symbol;Acc:MGI:2157946]	10321	6.80489	5.55543	2.96384	-2.31236	0.279232	2.03313	0.000366336	0.0342875	0.0805057	0.840673	0.29065	0.00177912	0.105807	0.230691	0.933412	0.60622
Pgpep1	Pgpep1	ENSMUSG00000056204	66522	8	pyroglutamyl-peptidase I [Source:MGI Symbol;Acc:MGI:1913772]	7828	9.805	5.55166	0.789728	-4.03005	0.731875	3.29818	1.28971e-06	0.408382	0.000151553	0.446858	0.0167343	1.38226e-05	0.588743	0.00250647	0.715559	0.12326
Slc25a29	Slc25a29	ENSMUSG00000021265	214663	12	solute carrier family 25 (mitochondrial carrier, palmitoylcarnitine transporter), member 29 [Source:MGI Symbol;Acc:MGI:2444911]	8684	21.6987	5.55095	2.06409	-4.08279	-0.595921	4.67871	2.40523e-06	0.0443793	0.00018891	0.554305	0.00134052	2.38819e-05	0.129202	0.00295024	0.792631	0.0221702
Wbscr17	Wbscr17	ENSMUSG00000034040	212996	5	Williams-Beuren syndrome chromosome region 17 homolog (human) [Source:MGI Symbol;Acc:MGI:2137594]	10162	6.87484	5.54903	4.15567	-2.85305	-1.45969	4.31275	1.31534e-05	0.00102547	0.00977025	0.244878	0.00956975	0.000105342	0.00724654	0.0557019	0.538165	0.0860869
Lgals3bp	Lgals3bp	ENSMUSG00000033880	19039	11	lectin, galactoside-binding, soluble, 3 binding protein [Source:MGI Symbol;Acc:MGI:99554]	9783	14.1971	5.54798	1.20095	-4.28565	0.0613888	4.22426	0.000282209	0.356213	0.00277161	0.962483	0.0250953	0.00142829	0.539131	0.023343	0.98578	0.160153
Lphn2	Lphn2					10739	3.11248	5.54205	0.424304	-3.61957	1.49818	2.12139	7.74377e-05	0.728736	0.00319546	0.2765	0.27563	0.000471352	0.841329	0.0256482	0.569868	0.591735
Bend7	Bend7	ENSMUSG00000048186	209645	2	BEN domain containing 7 [Source:MGI Symbol;Acc:MGI:2443100]	9628	9.23588	5.54187	3.62662	-2.86064	-0.945384	3.80602	1.22453e-06	0.000754945	0.00411057	0.363883	0.00783401	1.3241e-05	0.0057154	0.0307575	0.646267	0.075477
2310039H08Rik	2310039H08Rik	ENSMUSG00000062619	67101	17	RIKEN cDNA 2310039H08 gene [Source:MGI Symbol;Acc:MGI:1914351]	10128	37.6653	5.53774	4.37556	-1.63587	-0.473688	2.10955	0.000589148	0.00456765	0.22327	0.741001	0.284487	0.00267354	0.0232357	0.434511	0.892139	0.601156
Plek	Plek	ENSMUSG00000020120	56193	11	pleckstrin [Source:MGI Symbol;Acc:MGI:1860485]	9956	7.58255	5.53693	2.17409	-2.99165	0.371187	2.62046	2.14889e-05	0.0561428	0.0088717	0.745172	0.0999427	0.000160462	0.15317	0.0521024	0.894011	0.355193
Ntng2	Ntng2	ENSMUSG00000035513	171171	2	netrin G2 [Source:MGI Symbol;Acc:MGI:2159341]	9773	17.2021	5.53494	2.12735	-2.82192	0.585674	2.23624	0.00107506	0.144991	0.0571817	0.68283	0.270183	0.00439675	0.295068	0.186156	0.864407	0.585762
Tmem182	Tmem182	ENSMUSG00000079588	381339	1	transmembrane protein 182 [Source:MGI Symbol;Acc:MGI:1923725]	9675	32.6888	5.52341	-0.150146	-3.8441	1.82946	2.01464	1.34237e-05	0.886618	0.000948501	0.0975898	0.186365	0.000107115	0.938196	0.010495	0.325467	0.489629
Taf4b	Taf4b	ENSMUSG00000054321	72504	18	TATA-box binding protein associated factor 4b [Source:MGI Symbol;Acc:MGI:2152345]	10003	5.85984	5.52049	4.06884	-2.49473	-1.04307	3.5378	7.34509e-05	0.00234187	0.0372312	0.413681	0.042691	0.000451357	0.013742	0.139149	0.68864	0.222723
Sema3b	Sema3b	ENSMUSG00000057969	20347	9	sema domain, immunoglobulin domain (Ig), short basic domain, secreted, (semaphorin) 3B [Source:MGI Symbol;Acc:MGI:107561]	9387	10.0259	5.51251	0.166173	-3.98638	1.35995	2.62644	5.93306e-06	0.869745	0.000396896	0.193854	0.0733284	5.24795e-05	0.929199	0.00531724	0.475906	0.301477
Tmod4	Tmod4	ENSMUSG00000005628	50874	3	tropomodulin 4 [Source:MGI Symbol;Acc:MGI:1355285]	10827	13.0337	5.50878	1.83814	-2.47389	1.19674	1.27715	0.000543373	0.187811	0.0578958	0.456064	0.591902	0.00248854	0.351955	0.187976	0.721831	0.826606
Slc25a10	Slc25a10	ENSMUSG00000025792	27376	11	solute carrier family 25 (mitochondrial carrier, dicarboxylate transporter), member 10 [Source:MGI Symbol;Acc:MGI:1353497]	7143	13.9561	5.50505	1.66882	-3.67657	0.159655	3.51692	1.29245e-17	0.00267329	3.69512e-10	0.773975	7.94838e-06	1.23528e-15	0.0152052	4.12194e-08	0.905534	0.000404147
Cep19	Cep19	ENSMUSG00000035790	66994	16	centrosomal protein 19 [Source:MGI Symbol;Acc:MGI:1914244]	5461	39.7078	5.50025	1.04422	-3.87392	0.582108	3.29181	3.86697e-20	0.038129	2.18703e-12	0.25039	5.23825e-06	5.28421e-18	0.115177	4.68797e-10	0.542786	0.000287761
Gpr176	Gpr176	ENSMUSG00000040133	381413	2	G protein-coupled receptor 176 [Source:MGI Symbol;Acc:MGI:2685858]	8710	11.4749	5.4973	0.798209	-3.61412	1.08497	2.52915	6.85382e-11	0.259694	2.24889e-06	0.137032	0.0129518	1.98743e-09	0.441451	7.70686e-05	0.396726	0.105349
Gab3	Gab3	ENSMUSG00000032750	210710	X	growth factor receptor bound protein 2-associated protein 3 [Source:MGI Symbol;Acc:MGI:2387324]	10093	13.0821	5.49566	-0.80457	-4.47534	1.82489	2.65044	0.000663436	0.552601	0.00344854	0.193471	0.176344	0.00295064	0.71348	0.0272198	0.475536	0.475999
Thap3	Thap3	ENSMUSG00000039759	69876	4	THAP domain containing, apoptosis associated protein 3 [Source:MGI Symbol;Acc:MGI:1917126]	7668	48.3136	5.49487	1.3466	-4.50291	-0.35464	4.85755	3.35143e-06	0.179877	6.33442e-05	0.721386	0.000905399	3.18313e-05	0.341122	0.00121275	0.882943	0.0167193
Snx25	Snx25	ENSMUSG00000038291	102141	8	sorting nexin 25 [Source:MGI Symbol;Acc:MGI:2142610]	7266	16.6908	5.48545	0.288158	-4.10371	1.09358	3.01012	5.68595e-06	0.773648	0.000281166	0.282413	0.0376577	5.07419e-05	0.867303	0.00404967	0.575634	0.207143
Gpr123	Gpr123					9625	7.50063	5.47942	-0.096449	-3.45741	2.11845	1.33896	2.30148e-06	0.920048	0.000927931	0.0380311	0.33648	2.28934e-05	0.957901	0.0103406	0.187779	0.649206
Zfp641	Zfp641	ENSMUSG00000022987	239652	15	zinc finger protein 641 [Source:MGI Symbol;Acc:MGI:2442788]	10787	4.50461	5.47563	1.65915	-4.19012	-0.37364	4.56376	0.000304417	0.276761	0.00247245	0.819623	0.0397758	0.00152306	0.46079	0.0214709	0.925197	0.213718
Pqlc3	Pqlc3	ENSMUSG00000045679	217430	12	PQ loop repeat containing [Source:MGI Symbol;Acc:MGI:2444067]	8428	23.1214	5.4747	1.76833	-3.74203	-0.0356598	3.77769	2.36629e-07	0.0527362	0.000117293	0.968455	0.0035265	3.00097e-06	0.146397	0.00203531	0.987832	0.0447755
Abcc10	Abcc10	ENSMUSG00000032842	224814	17	ATP-binding cassette, sub-family C (CFTR/MRP), member 10 [Source:MGI Symbol;Acc:MGI:2386976]	9707	6.53555	5.47461	1.1756	-3.70335	0.595657	3.10769	0.000514933	0.377372	0.010261	0.656262	0.103841	0.00238325	0.560348	0.0574084	0.85286	0.362219
Edc4	Edc4	ENSMUSG00000036270	234699	8	enhancer of mRNA decapping 4 [Source:MGI Symbol;Acc:MGI:2446249]	6494	12.7147	5.47166	0.185695	-3.97207	1.31389	2.65818	7.38749e-21	0.703221	2.05412e-13	0.00896846	0.000155736	1.18765e-18	0.824498	7.01737e-11	0.0741627	0.00461383
Mfsd2a	Mfsd2a	ENSMUSG00000028655	76574	4	major facilitator superfamily domain containing 2A [Source:MGI Symbol;Acc:MGI:1923824]	5585	31.3167	5.47061	0.90961	-3.78272	0.778289	3.00443	1.64263e-27	0.032029	2.62717e-16	0.0709913	7.95115e-07	5.28155e-25	0.100471	1.59557e-13	0.270128	6.15641e-05
Gm10863	Gm10863	ENSMUSG00000075555		15	predicted gene 10863 [Source:MGI Symbol;Acc:MGI:3641623]	10161	42.9559	5.46289	4.15497	-2.15876	-0.850842	3.0096	0.000259101	0.00387258	0.0896253	0.533621	0.107078	0.00132918	0.0204025	0.247027	0.776667	0.367334
Sybu	Sybu	ENSMUSG00000022340	319613	15	syntabulin (syntaxin-interacting) [Source:MGI Symbol;Acc:MGI:2442392]	10259	8.68838	5.45526	1.33517	-3.03946	1.08063	1.95883	0.000105535	0.264887	0.0141061	0.384583	0.257099	0.000617619	0.447015	0.0716601	0.664284	0.572776
Cd93	Cd93	ENSMUSG00000027435	17064	2	CD93 antigen [Source:MGI Symbol;Acc:MGI:106664]	10189	4.3672	5.42894	2.1444	-2.04029	1.24425	0.796036	0.00070341	0.121157	0.133775	0.372646	0.685164	0.00308698	0.260521	0.317161	0.65421	0.872363
Syt3	Syt3	ENSMUSG00000030731	20981	7	synaptotagmin III [Source:MGI Symbol;Acc:MGI:99665]	9576	14.4751	5.42669	-0.0884571	-3.30279	2.21236	1.09043	6.87881e-06	0.929543	0.00228344	0.0375459	0.451489	5.9493e-05	0.963109	0.0203561	0.186061	0.739375
Kcnab2	Kcnab2	ENSMUSG00000028931	16498	4	potassium voltage-gated channel, shaker-related subfamily, beta member 2 [Source:MGI Symbol;Acc:MGI:109239]	9474	10.574	5.42162	0.5193	-3.57826	1.32406	2.2542	1.62362e-07	0.550103	0.000140265	0.142695	0.0723699	2.1593e-06	0.711262	0.00234104	0.403888	0.299577
Xylb	Xylb	ENSMUSG00000035769	102448	9	xylulokinase homolog (H. influenzae) [Source:MGI Symbol;Acc:MGI:2142985]	10662	4.94291	5.41816	4.59498	-2.85563	-2.03245	4.88809	0.000372321	0.0059418	0.0291621	0.247683	0.0268168	0.00180417	0.0283526	0.118513	0.540131	0.166286
Vwa1	Vwa1	ENSMUSG00000042116	246228	4	von Willebrand factor A domain containing 1 [Source:MGI Symbol;Acc:MGI:2179729]	5858	20.2517	5.41707	0.143807	-4.17023	1.10303	3.0672	1.88434e-10	0.838889	1.84456e-07	0.125026	0.00271551	4.90466e-09	0.910517	8.92246e-06	0.375594	0.0371538
Lix1	Lix1	ENSMUSG00000047786	66643	17	limb and CNS expressed 1 [Source:MGI Symbol;Acc:MGI:1913893]	10388	7.55833	5.41592	0.904091	-2.54501	1.96681	0.5782	0.00197593	0.535799	0.0928502	0.203523	0.794515	0.00728039	0.70039	0.252497	0.488282	0.921082
A830052D11Rik	A830052D11Rik	ENSMUSG00000097413		18	RIKEN cDNA A830052D11 gene [Source:MGI Symbol;Acc:MGI:3028074]	10886	12.7919	5.4134	-2.36825	-4.23066	3.55099	0.679676	0.00023728	0.0725444	0.00137614	0.0168795	0.821943	0.00123719	0.182858	0.0139486	0.112167	0.933722
9330133O14Rik	9330133O14Rik					8881	14.6937	5.40782	1.72074	-4.1049	-0.417816	4.52271	1.81636e-06	0.0807877	0.000109035	0.668515	0.00134577	1.87149e-05	0.196566	0.00191857	0.856564	0.0222235
Pdxp	Pdxp					10253	13.0131	5.3898	0.408436	-3.38941	1.59196	1.79745	0.00100042	0.765486	0.0217697	0.265833	0.367726	0.00415681	0.862402	0.0974556	0.558111	0.675741
C130060C02Rik	C130060C02Rik	ENSMUSG00000097557		19	RIKEN cDNA C130060C02 gene [Source:MGI Symbol;Acc:MGI:3041192]	10635	17.8333	5.38126	3.93381	-2.58843	-1.14097	3.7294	0.000159951	0.00694845	0.0324172	0.45949	0.0598399	0.00088268	0.0318493	0.127202	0.72363	0.269427
Mroh1	Mroh1	ENSMUSG00000022558	223658	15	maestro heat-like repeat family member 1 [Source:MGI Symbol;Acc:MGI:2442558]	10159	5.55609	5.37956	2.0926	-3.16457	0.122387	3.04219	1.85047e-05	0.0608618	0.00457397	0.913984	0.0527534	0.00014236	0.162033	0.0332464	0.965472	0.252583
Lrrc48	Lrrc48					10906	7.17554	5.37872	0.203471	-3.26395	1.9113	1.35265	0.000669127	0.88435	0.0141065	0.250569	0.631802	0.00297112	0.936934	0.0716601	0.542956	0.847052
Flnc	Flnc	ENSMUSG00000068699	68794	6	filamin C, gamma [Source:MGI Symbol;Acc:MGI:95557]	10172	2.87857	5.37009	3.17625	-4.18113	-1.98729	6.16843	0.000342109	0.0293736	0.00298201	0.169108	0.0020321	0.00168087	0.0942463	0.0245292	0.442636	0.0300201
Mppe1	Mppe1	ENSMUSG00000062526	225651	18	metallophosphoesterase 1 [Source:MGI Symbol;Acc:MGI:2661311]	8456	23.4625	5.36351	-0.389699	-3.90999	1.84322	2.06676	7.42717e-12	0.552774	7.12536e-08	0.00729152	0.0286641	2.5294e-10	0.713619	4.14332e-06	0.0656057	0.17452
Sdhaf1	Sdhaf1	ENSMUSG00000074211	68332	7	succinate dehydrogenase complex assembly factor 1 [Source:MGI Symbol;Acc:MGI:1915582]	8738	46.5014	5.35874	0.383694	-3.67841	1.29664	2.38178	1.42967e-10	0.58502	1.55451e-06	0.0747419	0.0186661	3.80272e-09	0.737056	5.57176e-05	0.278107	0.132101
Plcb1	Plcb1	ENSMUSG00000051177	18795	2	phospholipase C, beta 1 [Source:MGI Symbol;Acc:MGI:97613]	9611	5.17551	5.35667	1.74864	-3.23809	0.369938	2.86815	7.70854e-07	0.0636415	0.000857638	0.697053	0.0311821	8.80562e-06	0.167081	0.00973593	0.870779	0.184205
Tenm3	Tenm3	ENSMUSG00000031561	23965	8	teneurin transmembrane protein 3 [Source:MGI Symbol;Acc:MGI:1345183]	5723	6.21574	5.35028	0.36643	-3.63102	1.35283	2.27819	1.64427e-16	0.499016	1.10704e-09	0.0149604	0.00337851	1.26585e-14	0.669177	1.11029e-07	0.103054	0.0434516
Brinp3	Brinp3	ENSMUSG00000035131	215378	1	bone morphogenetic protein/retinoic acid inducible neural specific 3 [Source:MGI Symbol;Acc:MGI:2443035]	8213	14.8833	5.34533	3.47429	-2.04855	-0.177511	2.22606	1.25146e-05	0.00200179	0.051542	0.864361	0.129719	0.000100892	0.0122186	0.174121	0.944164	0.405169
Clu	Clu	ENSMUSG00000022037	12759	14	clusterin [Source:MGI Symbol;Acc:MGI:88423]	7973	27.0433	5.32532	-0.514184	-3.73108	2.10842	1.62266	3.2969e-07	0.555134	0.000108279	0.0206477	0.192137	4.00909e-06	0.715656	0.00191229	0.128105	0.497259
Ada	Ada	ENSMUSG00000017697	11486	2	adenosine deaminase [Source:MGI Symbol;Acc:MGI:87916]	9772	20.1594	5.31489	-1.63702	-3.99888	2.95302	1.04586	3.1943e-06	0.0935599	0.000167904	0.00446743	0.450702	3.05513e-05	0.218127	0.00271528	0.0484023	0.739272
Ssh1	Ssh1	ENSMUSG00000042121	231637	5	slingshot homolog 1 (Drosophila) [Source:MGI Symbol;Acc:MGI:2686240]	4450	24.3597	5.31444	0.38787	-3.93119	0.995382	2.9358	3.0305e-20	0.421871	2.8736e-13	0.0422355	2.47764e-05	4.35913e-18	0.600736	9.23947e-11	0.199587	0.00102987
Timm50	Timm50	ENSMUSG00000003438	66525	7	translocase of inner mitochondrial membrane 50 [Source:MGI Symbol;Acc:MGI:1913775]	8426	39.5499	5.30893	-2.58351	-4.21782	3.67462	0.543201	1.33015e-11	0.000189271	1.20826e-08	5.17993e-07	0.565539	4.36672e-10	0.00186912	8.86491e-07	3.98782e-05	0.811605
Nrp1	Nrp1	ENSMUSG00000025810	18186	8	neuropilin 1 [Source:MGI Symbol;Acc:MGI:106206]	9538	6.19679	5.30868	1.24969	-2.88687	1.17211	1.71476	9.76787e-06	0.220298	0.00666176	0.260256	0.236736	8.11416e-05	0.394124	0.043118	0.553386	0.550991
Slc16a6	Slc16a6	ENSMUSG00000041920	104681	11	solute carrier family 16 (monocarboxylic acid transporters), member 6 [Source:MGI Symbol;Acc:MGI:2144585]	9093	9.56236	5.30683	1.64516	-3.39996	0.261708	3.13826	6.67374e-06	0.10579	0.00150868	0.795572	0.0291551	5.79947e-05	0.237766	0.0149122	0.9138	0.17617
Alg12	Alg12	ENSMUSG00000035845	223774	15	asparagine-linked glycosylation 12 (alpha-1,6-mannosyltransferase) [Source:MGI Symbol;Acc:MGI:2385025]	7720	24.3286	5.30403	-0.358184	-4.08029	1.58192	2.49838	2.88904e-10	0.611868	2.46896e-07	0.0297669	0.0138532	7.17794e-09	0.758727	1.11994e-05	0.161697	0.110301
Trdmt1	Trdmt1	ENSMUSG00000026723	13434	2	tRNA aspartic acid methyltransferase 1 [Source:MGI Symbol;Acc:MGI:1274787]	7090	21.2959	5.30275	2.08159	-3.42638	-0.205215	3.6316	2.40448e-16	0.000263665	5.72021e-09	0.715349	5.41558e-06	1.80039e-14	0.00245751	4.66666e-07	0.879959	0.000296016
Armc6	Armc6	ENSMUSG00000002343	76813	8	armadillo repeat containing 6 [Source:MGI Symbol;Acc:MGI:1924063]	10328	12.0272	5.29622	4.87346	-1.78934	-1.36658	3.15592	0.000517379	0.00164191	0.164405	0.35395	0.107621	0.00239154	0.0104783	0.361117	0.639172	0.368041
Stk11ip	Stk11ip	ENSMUSG00000026213	71728	1	serine/threonine kinase 11 interacting protein [Source:MGI Symbol;Acc:MGI:1918978]	7606	11.9105	5.29546	-0.586359	-3.83718	2.04464	1.79254	3.97406e-12	0.359927	6.15085e-08	0.00226614	0.0502845	1.40597e-10	0.542796	3.67438e-06	0.0300648	0.245297
Golm1	Golm1	ENSMUSG00000021556	105348	13	golgi membrane protein 1 [Source:MGI Symbol;Acc:MGI:1917329]	10550	6.41559	5.29025	2.49051	-3.08255	-0.282812	3.36536	6.68546e-05	0.045926	0.00815082	0.829141	0.0554967	0.000417393	0.132645	0.0493655	0.92794	0.259628
Fam149a	Fam149a	ENSMUSG00000070044	212326	8	family with sequence similarity 149, member A [Source:MGI Symbol;Acc:MGI:2387177]	10360	4.56996	5.27941	0.555152	-3.47853	1.24573	2.2328	0.000472447	0.664991	0.0111508	0.351854	0.232984	0.00221475	0.798954	0.0606774	0.637333	0.546445
Ghr	Ghr	ENSMUSG00000055737	14600	15	growth hormone receptor [Source:MGI Symbol;Acc:MGI:95708]	10204	6.57779	5.27528	-4.016	-4.33598	4.95531	-0.61933	0.000297778	0.0032086	0.00169559	0.000575539	0.720525	0.00149395	0.0175998	0.0163602	0.0110382	0.88818
Ndst4	Ndst4	ENSMUSG00000027971	64580	3	N-deacetylase/N-sulfotransferase (heparin glucosaminyl) 4 [Source:MGI Symbol;Acc:MGI:1932545]	7577	14.8746	5.26822	-0.713493	-4.44231	1.5394	2.90291	2.24993e-07	0.405228	5.38634e-06	0.0787436	0.0184641	2.87652e-06	0.585976	0.000159145	0.287439	0.131107
Gpr21	Gpr21	ENSMUSG00000053164	338346	2	G protein-coupled receptor 21 [Source:MGI Symbol;Acc:MGI:2441890]	9475	16.8364	5.26713	-0.594155	-3.2233	2.63798	0.585317	1.88923e-05	0.564017	0.00371502	0.0168554	0.694158	0.000144427	0.722522	0.0288237	0.112082	0.87712
Chst10	Chst10	ENSMUSG00000026080	98388	1	carbohydrate sulfotransferase 10 [Source:MGI Symbol;Acc:MGI:2138283]	10686	6.24175	5.26649	3.72739	-3.19111	-1.65201	4.84312	0.000155932	0.0137717	0.00899418	0.308179	0.0177475	0.000864737	0.0536921	0.0525897	0.598404	0.12781
Zfp503	Zfp503	ENSMUSG00000039081	218820	14	zinc finger protein 503 [Source:MGI Symbol;Acc:MGI:1353644]	9502	8.89396	5.26413	2.81837	-3.05822	-0.612462	3.67068	4.00124e-07	0.00311242	0.000981444	0.512223	0.00483503	4.78049e-06	0.0171583	0.0107614	0.762795	0.0546604
Ahrr	Ahrr	ENSMUSG00000021575	11624	13	aryl-hydrocarbon receptor repressor [Source:MGI Symbol;Acc:MGI:1333776]	10289	5.71942	5.26301	4.47221	-2.22673	-1.43592	3.66265	0.000188988	0.00161252	0.0657103	0.295796	0.045419	0.00101825	0.0103479	0.203382	0.5885	0.230733
Btbd19	Btbd19	ENSMUSG00000073771		4	BTB (POZ) domain containing 19 [Source:MGI Symbol;Acc:MGI:1925861]	8351	18.0052	5.25953	0.624525	-4.17955	0.455463	3.72408	5.15987e-07	0.481722	2.53392e-05	0.610314	0.00385082	6.05232e-06	0.653859	0.000570754	0.82902	0.0472274
Ttc7	Ttc7	ENSMUSG00000036918	225049	17	tetratricopeptide repeat domain 7 [Source:MGI Symbol;Acc:MGI:1920999]	10447	5.26611	5.25775	6.47932	-2.20651	-3.42808	5.63459	0.000254778	0.000170778	0.0721245	0.0495603	0.00819219	0.0013111	0.00173507	0.215486	0.219438	0.0782841
Tvp23a	Tvp23a	ENSMUSG00000050908	383103	16	trans-golgi network vesicle protein 23A [Source:MGI Symbol;Acc:MGI:3665441]	6103	19.4287	5.25736	-0.655488	-4.04531	1.86754	2.17776	7.01419e-16	0.231855	4.12095e-11	0.00100095	0.00543944	4.88402e-14	0.408649	6.11739e-09	0.0164053	0.0594045
Nmnat2	Nmnat2	ENSMUSG00000042751	226518	1	nicotinamide nucleotide adenylyltransferase 2 [Source:MGI Symbol;Acc:MGI:2444155]	9711	7.40901	5.25423	3.23019	-3.69894	-1.6749	5.37385	8.23909e-05	0.010563	0.00270153	0.172689	0.0018597	0.000495433	0.0437072	0.0229116	0.448205	0.0282132
Lrat	Lrat	ENSMUSG00000028003	79235	3	lecithin-retinol acyltransferase (phosphatidylcholine-retinol-O-acyltransferase) [Source:MGI Symbol;Acc:MGI:1891259]	10807	3.0962	5.25306	-2.72337	-3.90347	4.07297	-0.169499	0.00034661	0.0345752	0.00314055	0.00466343	0.890518	0.00170069	0.106412	0.0253564	0.0496403	0.959206
Hist1h4i	Hist1h4i	ENSMUSG00000060639	319158	13	histone cluster 1, H4i [Source:MGI Symbol;Acc:MGI:2448432]	9658	89.7484	5.24958	-1.34224	-2.89331	3.69851	-0.805203	0.000169666	0.255277	0.0198061	0.00456744	0.624129	0.000927393	0.436523	0.0913384	0.0490959	0.842396
Farp1	Farp1	ENSMUSG00000025555	223254	14	FERM, RhoGEF (Arhgef) and pleckstrin domain protein 1 (chondrocyte-derived) [Source:MGI Symbol;Acc:MGI:2446173]	9756	6.87684	5.24653	1.80033	-3.96568	-0.519482	4.48516	7.35599e-05	0.124477	0.00137006	0.655546	0.00723999	0.00045152	0.266038	0.0139196	0.852521	0.0717618
Cd1d1	Cd1d1	ENSMUSG00000028076	12479	3	CD1d1 antigen [Source:MGI Symbol;Acc:MGI:107674]	10904	7.53476	5.23225	1.49226	-2.88936	0.850623	2.03874	0.000487037	0.295659	0.0196972	0.616766	0.418999	0.00226952	0.479546	0.091086	0.833052	0.715702
Plin4	Plin4	ENSMUSG00000002831	57435	17	perilipin 4 [Source:MGI Symbol;Acc:MGI:1929709]	10463	4.28416	5.23029	2.59277	-2.85329	-0.215767	3.06906	0.000106291	0.0379621	0.0158841	0.866317	0.0781427	0.000621047	0.114895	0.0781129	0.944783	0.312
Oxld1	Oxld1	ENSMUSG00000039670	66431	11	oxidoreductase like domain containing 1 [Source:MGI Symbol;Acc:MGI:1913681]	10640	24.174	5.22888	2.23529	-1.99797	0.995621	1.00235	0.0019284	0.1319	0.160344	0.519688	0.649094	0.0071341	0.276816	0.356133	0.768461	0.854204
Mettl1	Mettl1	ENSMUSG00000006732	17299	10	methyltransferase like 1 [Source:MGI Symbol;Acc:MGI:1339986]	8016	55.9532	5.21051	0.247936	-4.11087	0.851712	3.25916	2.75083e-08	0.75429	3.59937e-06	0.289299	0.00450063	4.35827e-07	0.855881	0.000112424	0.582541	0.0522036
Tmem41a	Tmem41a	ENSMUSG00000022856	66664	16	transmembrane protein 41a [Source:MGI Symbol;Acc:MGI:1913914]	7786	42.4954	5.20777	0.769898	-3.79686	0.641007	3.15586	1.56988e-09	0.293371	2.31513e-06	0.386056	0.00276594	3.29403e-08	0.477678	7.85994e-05	0.665256	0.0376085
Pole	Pole	ENSMUSG00000007080	18973	5	polymerase (DNA directed), epsilon [Source:MGI Symbol;Acc:MGI:1196391]	9888	4.68623	5.20672	0.648184	-3.29046	1.26807	2.02238	7.49372e-06	0.511294	0.00175229	0.21597	0.155475	6.4353e-05	0.679954	0.016701	0.502746	0.447128
Alkbh7	Alkbh7	ENSMUSG00000002661	66400	17	alkB homolog 7 [Source:MGI Symbol;Acc:MGI:1913650]	7163	60.8276	5.19911	-1.34534	-3.92553	2.61893	1.30661	3.36597e-19	0.0066724	4.83126e-13	5.52209e-07	0.0619186	3.95664e-17	0.0308817	1.42744e-10	4.19218e-05	0.273935
Qpctl	Qpctl	ENSMUSG00000030407	67369	7	glutaminyl-peptide cyclotransferase-like [Source:MGI Symbol;Acc:MGI:1914619]	8977	20.6945	5.19552	-0.266394	-3.75003	1.71188	2.03815	2.39275e-08	0.734481	1.42e-05	0.0363058	0.0712249	3.8467e-07	0.845693	0.000352006	0.182396	0.296847
Ubox5	Ubox5	ENSMUSG00000027300	140629	2	U box domain containing 5 [Source:MGI Symbol;Acc:MGI:2154658]	7195	14.9466	5.19314	0.829254	-3.70058	0.663307	3.03727	2.3896e-13	0.169586	1.83186e-08	0.277113	0.000458559	1.01646e-11	0.328708	1.25949e-06	0.570622	0.0103574
Ccbl1	Ccbl1					9125	21.7096	5.1914	2.09882	-3.04746	0.0451208	3.00234	6.08272e-08	0.0134036	0.000396636	0.957193	0.0111199	8.90178e-07	0.0526322	0.00531724	0.984553	0.0950453
Vps51	Vps51	ENSMUSG00000024797	68505	19	VPS51 GARP complex subunit [Source:MGI Symbol;Acc:MGI:1915755]	7975	19.3363	5.1862	-0.379883	-3.93953	1.62655	2.31299	2.75578e-11	0.563671	6.96405e-08	0.0168339	0.0143801	8.55856e-10	0.722313	4.09307e-06	0.112054	0.112913
Crocc	Crocc	ENSMUSG00000040860	230872	4	ciliary rootlet coiled-coil, rootletin [Source:MGI Symbol;Acc:MGI:3529431]	9065	6.58627	5.18465	-1.93726	-3.56939	3.55252	0.0168655	3.91227e-05	0.075742	0.00214332	0.00243123	0.993878	0.000264169	0.188336	0.0194432	0.0314908	0.997437
E430018J23Rik	E430018J23Rik	ENSMUSG00000078580		7	RIKEN cDNA E430018J23 gene [Source:MGI Symbol;Acc:MGI:2141981]	10151	13.8082	5.18385	2.04321	-3.31797	-0.177331	3.4953	2.55936e-05	0.0655488	0.00291219	0.874136	0.0249498	0.000185659	0.17033	0.0241365	0.947992	0.159712
Alyref2	Alyref2	ENSMUSG00000060244	56009	1	Aly/REF export factor 2 [Source:MGI Symbol;Acc:MGI:1913144]	9952	25.449	5.17448	2.84313	-3.12479	-0.793441	3.91823	7.57827e-05	0.0186676	0.00798558	0.502009	0.0178559	0.000463343	0.0671298	0.0486884	0.755293	0.128337
Rbl1	Rbl1	ENSMUSG00000027641	19650	2	retinoblastoma-like 1 (p107) [Source:MGI Symbol;Acc:MGI:103300]	8033	10.3706	5.17358	3.0272	-2.84434	-0.697963	3.5423	3.73414e-12	1.06973e-05	1.81656e-05	0.292521	0.000137276	1.3297e-10	0.000179635	0.000427989	0.585179	0.00418021
Polr2l	Polr2l	ENSMUSG00000038489	66491	7	polymerase (RNA) II (DNA directed) polypeptide L [Source:MGI Symbol;Acc:MGI:1913741]	9676	20.5234	5.16473	0.90141	-3.91997	0.34334	3.57663	0.000919938	0.498264	0.0074357	0.79701	0.0631202	0.00386956	0.668346	0.0463967	0.913974	0.277009
Dennd6b	Dennd6b	ENSMUSG00000015377	69440	15	DENN/MADD domain containing 6B [Source:MGI Symbol;Acc:MGI:1916690]	7271	12.267	5.15731	0.215947	-3.73197	1.20939	2.52259	2.20723e-16	0.684886	1.64138e-10	0.027044	0.000986176	1.6641e-14	0.812017	2.08646e-08	0.152395	0.0177317
Klhl25	Klhl25	ENSMUSG00000055652	207952	7	kelch-like 25 [Source:MGI Symbol;Acc:MGI:2668031]	7713	15.5204	5.15497	0.881782	-3.73634	0.536854	3.19948	2.37063e-11	0.181361	1.97189e-07	0.419788	0.000736346	7.40448e-10	0.343017	9.45472e-06	0.693744	0.014426
Abt1	Abt1	ENSMUSG00000036376	30946	13	activator of basal transcription 1 [Source:MGI Symbol;Acc:MGI:1353636]	9050	9.06107	5.15441	0.834488	-3.66882	0.651105	3.01772	1.57819e-05	0.411812	0.000934256	0.525463	0.0389427	0.000123676	0.591969	0.0103899	0.77178	0.212013
Rad51b	Rad51b	ENSMUSG00000059060	19363	12	RAD51 paralog B [Source:MGI Symbol;Acc:MGI:1099436]	7906	27.6504	5.15438	-0.476305	-3.99967	1.63101	2.36866	1.19238e-10	0.481949	1.15378e-07	0.0196279	0.014821	3.26695e-09	0.653924	6.0933e-06	0.123816	0.115319
Pfkm	Pfkm	ENSMUSG00000033065	18642	15	phosphofructokinase, muscle [Source:MGI Symbol;Acc:MGI:97548]	9934	11.5355	5.15384	2.53601	-3.35685	-0.739019	4.09587	4.33016e-05	0.0282492	0.0034755	0.516967	0.0105131	0.000287067	0.0914752	0.0273707	0.766584	0.0911416
Pcdhb11	Pcdhb11	ENSMUSG00000051486	93882	18	protocadherin beta 11 [Source:MGI Symbol;Acc:MGI:2136746]	10249	7.64877	5.15325	3.13107	-2.438	-0.415825	2.85383	0.000232726	0.0163372	0.0458682	0.744612	0.10521	0.00122081	0.0610963	0.161076	0.893633	0.364205
Cisd3	Cisd3	ENSMUSG00000078695	217149;100504524	11	CDGSH iron sulfur domain 3 [Source:MGI Symbol;Acc:MGI:101788]	10146	38.9435	5.14426	-1.52541	-3.39022	3.27945	0.110761	0.000240952	0.202886	0.00792991	0.0115527	0.95547	0.00125081	0.372202	0.0484663	0.0877653	0.983712
Fam161a	Fam161a	ENSMUSG00000049811	73873	11	family with sequence similarity 161, member A [Source:MGI Symbol;Acc:MGI:1921123]	6941	30.2973	5.12716	0.32242	-3.80242	1.00232	2.8001	4.25574e-14	0.575344	2.12113e-09	0.0875142	0.000730733	2.1639e-12	0.730716	1.95613e-07	0.307303	0.0143873
LOC100862268	LOC100862268					9358	18.8884	5.11808	-0.635324	-5.19048	0.562926	4.62755	0.00120207	0.637861	0.00106435	0.676377	0.0197971	0.00479951	0.778769	0.0115055	0.861461	0.137291
Tmem201	Tmem201	ENSMUSG00000044700	230917	4	transmembrane protein 201 [Source:MGI Symbol;Acc:MGI:1196277]	7524	14.5155	5.11618	-0.457395	-3.81321	1.76036	2.05285	1.36191e-10	0.497253	3.2418e-07	0.0115997	0.0332831	3.64912e-09	0.667892	1.42181e-05	0.0879996	0.192006
St6galnac6	St6galnac6	ENSMUSG00000026811	50935	2	ST6 (alpha-N-acetyl-neuraminyl-2,3-beta-galactosyl-1,3)-N-acetylgalactosaminide alpha-2,6-sialyltransferase 6 [Source:MGI Symbol;Acc:MGI:1355316]	8899	18.9129	5.11546	0.731518	-3.61088	0.773065	2.83781	7.16621e-08	0.36728	4.04261e-05	0.348442	0.0149128	1.03489e-06	0.550618	0.000824512	0.634967	0.115757
B230209E15Rik	B230209E15Rik	ENSMUSG00000109006		7	RIKEN cDNA B230209E15 gene [Source:MGI Symbol;Acc:MGI:2442668]	9403	18.8646	5.11378	0.917392	-3.67329	0.523098	3.15019	3.32601e-06	0.33218	0.000323603	0.584721	0.0204831	3.16448e-05	0.517661	0.00454125	0.812645	0.140566
Qrsl1	Qrsl1	ENSMUSG00000019863	76563	10	glutaminyl-tRNA synthase (glutamine-hydrolyzing)-like 1 [Source:MGI Symbol;Acc:MGI:1923813]	8628	23.4406	5.10802	-0.902836	-3.74797	2.26289	1.48508	6.1884e-10	0.198702	1.11532e-06	0.00216262	0.137834	1.44247e-08	0.366676	4.10526e-05	0.0290127	0.421012
Rnf150	Rnf150	ENSMUSG00000047747	330812	8	ring finger protein 150 [Source:MGI Symbol;Acc:MGI:2443860]	9972	3.0829	5.10407	2.50458	-2.72916	-0.129679	2.85884	0.00114972	0.075654	0.0510251	0.924431	0.140026	0.00464134	0.188222	0.173447	0.971037	0.424858
Cd59b	Cd59b	ENSMUSG00000068686	333883	2	CD59b antigen [Source:MGI Symbol;Acc:MGI:1888996]	8046	61.014	5.10311	3.31843	-3.31518	-1.5305	4.84567	1.37145e-08	8.91248e-05	5.6246e-05	0.0590621	2.41512e-05	2.33896e-07	0.00102022	0.00110075	0.244849	0.00101157
Zfp873	Zfp873	ENSMUSG00000061371	408062	10	zinc finger protein 873 [Source:MGI Symbol;Acc:MGI:3040689]	10760	8.1678	5.09802	1.35616	-3.37916	0.362711	3.01644	0.000151206	0.284634	0.00471591	0.793617	0.108778	0.000842668	0.468688	0.0340068	0.912646	0.36986
Gpn2	Gpn2	ENSMUSG00000028848	100210	4	GPN-loop GTPase 2 [Source:MGI Symbol;Acc:MGI:2140368]	9376	29.0498	5.09312	1.35486	-3.39518	0.343086	3.05209	4.07018e-06	0.157931	0.000816344	0.72157	0.0254067	3.76121e-05	0.313064	0.00933501	0.882943	0.160733
Ino80dos	Ino80dos	ENSMUSG00000084799		1	INO80 complex subunit D, opposite strand [Source:MGI Symbol;Acc:MGI:3651861]	7839	33.305	5.09178	0.6633	-3.59262	0.835857	2.75677	1.46657e-12	0.280403	7.07534e-08	0.18135	0.0017788	5.56685e-11	0.464942	4.13624e-06	0.46	0.0272732
Fat3	Fat3	ENSMUSG00000074505	270120	9	FAT atypical cadherin 3 [Source:MGI Symbol;Acc:MGI:2444314]	10520	1.02877	5.07939	-2.99415	-3.00769	5.06585	-2.05816	0.00377873	0.0551324	0.0541231	0.00385775	0.330974	0.0125845	0.151358	0.179295	0.0435221	0.644462
Gcat	Gcat	ENSMUSG00000006378	14429;26912	15	glycine C-acetyltransferase (2-amino-3-ketobutyrate-coenzyme A ligase) [Source:MGI Symbol;Acc:MGI:1349389]	7815	22.0257	5.07443	1.17698	-3.35554	0.541916	2.81362	7.65276e-13	0.0541462	2.35541e-07	0.379044	0.00122434	3.0294e-11	0.149213	1.07289e-05	0.660141	0.0207512
Cyp2u1	Cyp2u1	ENSMUSG00000027983	71519	3	cytochrome P450, family 2, subfamily u, polypeptide 1 [Source:MGI Symbol;Acc:MGI:1918769]	8226	20.8467	5.06533	1.02041	-3.64738	0.397535	3.24984	5.28662e-09	0.171952	6.35657e-06	0.5963	0.00241235	9.84554e-08	0.331413	0.000181868	0.818425	0.0339405
Efnb1	Efnb1	ENSMUSG00000031217	13641	X	ephrin B1 [Source:MGI Symbol;Acc:MGI:102708]	10664	5.57454	5.063	-2.70511	-3.38376	4.38435	-1.00059	0.00143547	0.0528125	0.0178809	0.00476609	0.595529	0.00555686	0.146497	0.0852856	0.0503024	0.829152
Rtn2	Rtn2	ENSMUSG00000030401	20167	7	reticulon 2 (Z-band associated protein) [Source:MGI Symbol;Acc:MGI:107612]	8331	22.3287	5.0622	0.333631	-4.55552	0.173052	4.38246	8.69569e-05	0.761116	0.00029306	0.874937	0.00661136	0.00051861	0.86009	0.00419887	0.948491	0.0679737
Whrn	Whrn	ENSMUSG00000039137	73750	4	whirlin [Source:MGI Symbol;Acc:MGI:2682003]	10152	7.33387	5.06108	0.802222	-1.53707	2.72179	-1.18471	0.00255492	0.570284	0.282607	0.0740406	0.55224	0.00905947	0.727037	0.498849	0.276722	0.803981
Pcdhb13	Pcdhb13	ENSMUSG00000047307	93884	18	protocadherin beta 13 [Source:MGI Symbol;Acc:MGI:2136748]	9540	9.9005	5.04697	2.03162	-3.08255	-0.0671964	3.14975	2.88076e-05	0.0578757	0.00485091	0.949226	0.0353567	0.000203689	0.156686	0.0345698	0.981178	0.200373
Cenpa	Cenpa	ENSMUSG00000029177	12615	5	centromere protein A [Source:MGI Symbol;Acc:MGI:88375]	10611	15.8995	5.0466	0.515927	-2.90924	1.62143	1.28781	0.000462883	0.675931	0.0223953	0.223714	0.490192	0.00217832	0.80581	0.0995491	0.512821	0.764292
Orai3	Orai3	ENSMUSG00000043964	269999	7	ORAI calcium release-activated calcium modulator 3 [Source:MGI Symbol;Acc:MGI:3039586]	7074	28.7339	5.04298	0.511299	-3.81599	0.715686	3.10031	1.91807e-11	0.424759	6.66161e-08	0.26915	0.000789374	6.1311e-10	0.603338	3.93647e-06	0.561731	0.015166
Fv1	Fv1	ENSMUSG00000070583	14349	4	Friend virus susceptibility 1 [Source:MGI Symbol;Acc:MGI:95595]	9441	27.4468	5.03275	0.944911	-3.17322	0.914616	2.25861	1.36157e-05	0.340824	0.00261281	0.364272	0.110848	0.000108489	0.526552	0.0223325	0.64657	0.373318
Syk	Syk	ENSMUSG00000021457	20963	13	spleen tyrosine kinase [Source:MGI Symbol;Acc:MGI:99515]	9881	5.80172	5.03121	2.01565	-4.3965	-1.38094	5.77744	0.0013022	0.155135	0.00370444	0.325689	0.00464177	0.00512626	0.309421	0.0287825	0.614609	0.0531119
Zfp653	Zfp653	ENSMUSG00000038895	319601	9	zinc finger protein 653 [Source:MGI Symbol;Acc:MGI:2442362]	7897	24.4917	5.02721	0.772857	-3.6169	0.637455	2.97945	5.60371e-11	0.240373	4.1241e-07	0.338302	0.0016181	1.66016e-09	0.4185	1.76112e-05	0.627306	0.0256221
Nr2e1	Nr2e1	ENSMUSG00000019803	21907	10	nuclear receptor subfamily 2, group E, member 1 [Source:MGI Symbol;Acc:MGI:1100526]	10341	7.20284	5.019	-1.82633	-5.37535	1.46998	3.90537	0.00594899	0.260394	0.00382163	0.358727	0.0904939	0.0183765	0.442161	0.0293798	0.642436	0.337063
Tsr3	Tsr3	ENSMUSG00000015126	68327	17	TSR3 20S rRNA accumulation [Source:MGI Symbol;Acc:MGI:1915577]	5993	53.9849	5.01649	-0.404779	-3.94271	1.47856	2.46415	2.38411e-09	0.569915	7.62144e-07	0.0424142	0.0158707	4.78221e-08	0.726749	2.97563e-05	0.200031	0.119848
Eno3	Eno3	ENSMUSG00000060600	13808	11	enolase 3, beta muscle [Source:MGI Symbol;Acc:MGI:95395]	8618	29.775	5.01419	-0.797068	-3.69395	2.11731	1.57664	3.49749e-07	0.341862	6.05178e-05	0.015458	0.186519	4.22949e-06	0.527486	0.00117094	0.105419	0.489916
Tsacc	Tsacc	ENSMUSG00000010538	76927	3	TSSK6 activating co-chaperone [Source:MGI Symbol;Acc:MGI:1924177]	10671	41.78	5.00207	3.70356	-2.31046	-1.01195	3.32241	0.000537116	0.0113379	0.0623696	0.506305	0.093855	0.00246402	0.0462167	0.196951	0.759201	0.344804
3000002C10Rik	3000002C10Rik	ENSMUSG00000070282		9	RIKEN cDNA 3000002C10 gene [Source:MGI Symbol;Acc:MGI:3036226]	10837	12.951	4.9985	1.23041	-2.76251	1.00558	1.75693	0.000500642	0.344285	0.024546	0.494692	0.395959	0.00232894	0.529486	0.106062	0.75023	0.696816
Mocs1	Mocs1	ENSMUSG00000064120	56738	17	molybdenum cofactor synthesis 1 [Source:MGI Symbol;Acc:MGI:1928904]	8084	18.9715	4.9907	-0.0389125	-3.71371	1.3159	2.39781	1.27797e-08	0.958397	6.38834e-06	0.0852781	0.0253205	2.18977e-07	0.979178	0.000181868	0.302427	0.160567
9530077C05Rik	9530077C05Rik	ENSMUSG00000036411	68283	9	RIKEN cDNA 9530077C05 gene [Source:MGI Symbol;Acc:MGI:1915533]	8465	22.1548	4.99064	-0.774043	-3.86088	1.9038	1.95709	2.43032e-09	0.279235	1.00291e-06	0.0102661	0.0551947	4.86598e-08	0.463693	3.76762e-05	0.0809145	0.259299
Atpaf2	Atpaf2	ENSMUSG00000042709	246782	11	ATP synthase mitochondrial F1 complex assembly factor 2 [Source:MGI Symbol;Acc:MGI:2180561]	7164	30.253	4.98951	0.661635	-3.23362	1.09426	2.13936	5.12092e-10	0.33348	1.13979e-05	0.115567	0.0284749	1.21436e-08	0.51884	0.000293873	0.358812	0.173738
Thbs3	Thbs3	ENSMUSG00000028047	21827	3	thrombospondin 3 [Source:MGI Symbol;Acc:MGI:98739]	5957	20.9357	4.98711	0.0205914	-3.73975	1.22677	2.51298	2.44857e-17	0.9672	1.37904e-11	0.0165696	0.00048039	2.23064e-15	0.983209	2.39296e-09	0.111128	0.0106524
Ldhd	Ldhd	ENSMUSG00000031958	52815	8	lactate dehydrogenase D [Source:MGI Symbol;Acc:MGI:106428]	9966	14.4519	4.97128	2.95245	-2.3427	-0.323872	2.66657	0.000136513	0.0142784	0.0411041	0.781093	0.101105	0.000772044	0.0550977	0.149318	0.908298	0.356658
1110008P14Rik	1110008P14Rik	ENSMUSG00000039195	73737	2	RIKEN cDNA 1110008P14 gene [Source:MGI Symbol;Acc:MGI:1920987]	9347	60.6783	4.96791	-0.522799	-3.84764	1.64306	2.20458	2.96529e-06	0.565276	0.000125633	0.080237	0.0911478	2.86872e-05	0.72366	0.00214409	0.290605	0.338985
N6amt1	N6amt1	ENSMUSG00000044442	67768	16	N-6 adenine-specific DNA methyltransferase 1 (putative) [Source:MGI Symbol;Acc:MGI:1915018]	5492	39.6142	4.96617	-0.326677	-3.66317	1.62967	2.0335	1.22506e-25	0.41892	1.62779e-16	9.57587e-05	0.000439619	3.18865e-23	0.598019	1.04677e-13	0.00285241	0.0100123
Gm14403	Gm14403	ENSMUSG00000094786		2	predicted gene 14403 [Source:MGI Symbol;Acc:MGI:3649813]	5827	18.2746	4.96429	1.49832	-3.23019	0.235778	2.99442	3.61054e-31	6.62735e-05	1.57849e-16	0.531138	1.69582e-08	1.57882e-28	0.000799945	1.04677e-13	0.77491	2.18103e-06
Rab36	Rab36	ENSMUSG00000020175	76877	10	RAB36, member RAS oncogene family [Source:MGI Symbol;Acc:MGI:1924127]	9393	12.9793	4.96322	3.21347	-1.7864	-0.0366494	1.82305	0.00377926	0.0423247	0.23027	0.980134	0.381875	0.0125845	0.124715	0.442414	0.992777	0.685024
Itgb3	Itgb3	ENSMUSG00000020689	16416	11	integrin beta 3 [Source:MGI Symbol;Acc:MGI:96612]	6526	10.8734	4.96211	1.6372	-3.08576	0.239148	2.84661	1.81509e-26	6.8466e-05	3.27859e-13	0.561698	8.68341e-07	5.08783e-24	0.000816355	9.95598e-11	0.797568	6.59216e-05
Aaed1	Aaed1	ENSMUSG00000021482	66129	13	AhpC/TSA antioxidant enzyme domain containing 1 [Source:MGI Symbol;Acc:MGI:1913379]	8438	49.2857	4.96161	-1.10088	-3.54341	2.51908	1.02433	6.07394e-11	0.0907092	4.97372e-07	0.000247748	0.266953	1.78977e-09	0.213209	2.05957e-05	0.00597576	0.582905
Fam60a	Fam60a	ENSMUSG00000039985	56306	6	family with sequence similarity 60, member A [Source:MGI Symbol;Acc:MGI:1929091]	10240	10.6349	4.96	2.61699	-2.35141	-0.00839964	2.35981	0.000389748	0.0403106	0.0556477	0.994671	0.177549	0.00187615	0.120238	0.18263	0.998892	0.477627
Pcdh19	Pcdh19	ENSMUSG00000051323	279653	X	protocadherin 19 [Source:MGI Symbol;Acc:MGI:2685563]	5893	6.54835	4.95504	2.01705	-3.08837	-0.150382	3.23876	8.54529e-33	6.17115e-08	3.03241e-16	0.684219	4.62457e-10	4.67086e-30	2.03202e-06	1.74475e-13	0.864705	8.02473e-08
Bloc1s2	Bloc1s2	ENSMUSG00000057506	73689	19	biogenesis of lysosomal organelles complex-1, subunit 2 [Source:MGI Symbol;Acc:MGI:1920939]	7175	62.775	4.95084	-1.09039	-4.32037	1.72085	2.59952	1.85674e-07	0.181766	2.68066e-06	0.0385758	0.0252133	2.43088e-06	0.343546	8.80029e-05	0.189362	0.160437
Chchd6	Chchd6	ENSMUSG00000030086	66098	6	coiled-coil-helix-coiled-coil-helix domain containing 6 [Source:MGI Symbol;Acc:MGI:1913348]	10603	19.9891	4.94976	2.39056	-3.80778	-1.24858	5.05637	0.000620714	0.0968865	0.00484602	0.396365	0.010943	0.00279705	0.223358	0.0345698	0.673703	0.0939739
Shisa5	Shisa5	ENSMUSG00000025647	66940	9	shisa family member 5 [Source:MGI Symbol;Acc:MGI:1915044]	9409	20.6086	4.94773	1.21984	-3.16054	0.567348	2.59319	7.98754e-07	0.16208	0.00055596	0.520111	0.0366697	9.06748e-06	0.318794	0.0069144	0.768652	0.204111
Gabrr2	Gabrr2	ENSMUSG00000023267	14409	4	gamma-aminobutyric acid (GABA) C receptor, subunit rho 2 [Source:MGI Symbol;Acc:MGI:95626]	8679	24.7493	4.94748	-0.983538	-3.48355	2.44747	1.03608	1.3247e-06	0.261264	0.000249276	0.00785971	0.403605	1.41146e-05	0.443087	0.00367262	0.0678692	0.704039
Tor4a	Tor4a	ENSMUSG00000059555	227612	2	torsin family 4, member A [Source:MGI Symbol;Acc:MGI:2442720]	10780	5.41321	4.94742	1.75244	-2.50819	0.686802	1.82138	0.000672142	0.184874	0.0445973	0.635182	0.361307	0.00297725	0.347677	0.158086	0.842306	0.671419
Pomc	Pomc	ENSMUSG00000020660	18976	12	pro-opiomelanocortin-alpha [Source:MGI Symbol;Acc:MGI:97742]	10061	30.9899	4.93945	-0.390222	-3.45199	1.87768	1.57432	0.000237798	0.733703	0.00553222	0.117743	0.341604	0.00123909	0.845277	0.0377753	0.362175	0.6549
Gpr37l1	Gpr37l1	ENSMUSG00000026424	171469	1	G protein-coupled receptor 37-like 1 [Source:MGI Symbol;Acc:MGI:1928503]	8935	18.8066	4.9355	0.637728	-2.82306	1.47472	1.34834	2.8524e-05	0.525732	0.00805659	0.15294	0.346351	0.000202247	0.692781	0.0490286	0.420298	0.658718
Brf2	Brf2	ENSMUSG00000031487	66653	8	BRF2, RNA polymerase III transcription initiation factor 50kDa subunit [Source:MGI Symbol;Acc:MGI:1913903]	7620	39.5515	4.93548	0.220517	-3.50278	1.21219	2.29059	1.40026e-14	0.687647	4.20268e-09	0.0314762	0.00362722	7.85009e-13	0.813496	3.61762e-07	0.166628	0.0456304
Ciapin1	Ciapin1	ENSMUSG00000031781	109006	8	cytokine induced apoptosis inhibitor 1 [Source:MGI Symbol;Acc:MGI:1922083]	6188	15.0454	4.93374	-2.05278	-4.0516	2.93492	1.11669	1.07955e-17	5.35659e-05	1.86619e-13	2.77558e-08	0.109932	1.04439e-15	0.000680909	6.58102e-11	3.12811e-06	0.371491
Aimp2	Aimp2	ENSMUSG00000029610	231872	5	aminoacyl tRNA synthetase complex-interacting multifunctional protein 2 [Source:MGI Symbol;Acc:MGI:2385237]	9096	39.7956	4.92868	1.71027	-3.16516	0.0532555	3.1119	4.66581e-08	0.0324492	0.000125012	0.94674	0.00572437	7.00641e-07	0.101266	0.00214409	0.98018	0.0615804
Tmem160	Tmem160	ENSMUSG00000019158	69094	7	transmembrane protein 160 [Source:MGI Symbol;Acc:MGI:1916344]	8227	61.1144	4.92572	-1.43218	-4.08818	2.26972	1.81847	1.24756e-08	0.0565726	8.16214e-07	0.00341967	0.084977	2.14439e-07	0.153997	3.11988e-05	0.0397277	0.326642
Cacna1d	Cacna1d	ENSMUSG00000015968	12289	14	calcium channel, voltage-dependent, L type, alpha 1D subunit [Source:MGI Symbol;Acc:MGI:88293]	10386	2.82218	4.92304	2.73634	-1.66748	0.51922	1.14826	0.00256087	0.0650736	0.234137	0.721473	0.573352	0.00906972	0.169297	0.446387	0.882943	0.814842
4921531C22Rik	4921531C22Rik	ENSMUSG00000085704		2	RIKEN cDNA 4921531C22 gene [Source:MGI Symbol;Acc:MGI:1913980]	8798	23.7136	4.92092	0.528205	-3.23523	1.15749	2.07773	3.97763e-09	0.461176	2.50628e-05	0.115879	0.0430518	7.58873e-08	0.637528	0.000566088	0.359213	0.223902
B230217O12Rik	B230217O12Rik	ENSMUSG00000097785		19	RIKEN cDNA B230217O12 gene [Source:MGI Symbol;Acc:MGI:2444948]	10145	15.6345	4.91748	3.0142	-2.73416	-0.83088	3.56504	7.40512e-05	0.0103203	0.0137565	0.471855	0.025211	0.000453771	0.0430947	0.0705373	0.731884	0.160437
B4galt7	B4galt7	ENSMUSG00000021504	218271	13	xylosylprotein beta1,4-galactosyltransferase, polypeptide 7 (galactosyltransferase I) [Source:MGI Symbol;Acc:MGI:2384987]	10468	14.4131	4.91583	1.30849	-2.36699	1.24035	1.12664	0.00245111	0.3519	0.0973379	0.39287	0.580609	0.00874659	0.535641	0.259779	0.671126	0.819948
Dnmt3b	Dnmt3b	ENSMUSG00000027478	13436	2	DNA methyltransferase 3B [Source:MGI Symbol;Acc:MGI:1261819]	10357	6.53486	4.9088	4.70647	-2.35707	-2.15474	4.51181	0.000120411	0.000571268	0.035031	0.112015	0.0101317	0.000690627	0.00457517	0.133157	0.352418	0.0890354
1810022K09Rik	1810022K09Rik	ENSMUSG00000078784	69126	3	RIKEN cDNA 1810022K09 gene [Source:MGI Symbol;Acc:MGI:1916376]	8235	125.881	4.9083	-1.11074	-3.84281	2.17623	1.66658	6.23454e-08	0.155113	7.79833e-06	0.00723533	0.131455	9.08746e-07	0.309421	0.000213801	0.0653152	0.408607
Gtpbp3	Gtpbp3	ENSMUSG00000007610	70359	8	GTP binding protein 3 [Source:MGI Symbol;Acc:MGI:1917609]	9010	15.1965	4.90609	2.15823	-3.12643	-0.378566	3.505	3.76817e-07	0.0130906	0.00040443	0.657514	0.0038316	4.52677e-06	0.0516818	0.00539833	0.85304	0.0471313
Arv1	Arv1	ENSMUSG00000031982	68865	8	ARV1 homolog, fatty acid homeostasis modulator [Source:MGI Symbol;Acc:MGI:1916115]	9583	32.3216	4.90227	1.10842	-3.01216	0.781685	2.23048	2.83157e-06	0.222532	0.0015468	0.39738	0.0847447	2.75398e-05	0.396925	0.0152065	0.67435	0.326171
Rad9a	Rad9a	ENSMUSG00000024824;ENSMUSG00000097909	19367	19	RAD9 checkpoint clamp component A [Source:MGI Symbol;Acc:MGI:1328356]	8992	20.9453	4.89929	0.971062	-3.48175	0.446479	3.03527	6.11437e-07	0.254342	0.000140878	0.602659	0.01285	7.08826e-06	0.4354	0.00234768	0.823534	0.104676
Nans	Nans	ENSMUSG00000028334	94181	4	N-acetylneuraminic acid synthase (sialic acid synthase) [Source:MGI Symbol;Acc:MGI:2149820]	7626	29.0701	4.89331	-0.0162629	-3.56078	1.34879	2.21199	1.0392e-08	0.982201	8.63761e-06	0.0708708	0.0343552	1.82939e-07	0.990994	0.000232687	0.269857	0.196363
Ncmap	Ncmap	ENSMUSG00000043924	230822	4	noncompact myelin associated protein [Source:MGI Symbol;Acc:MGI:2444888]	10688	10.8864	4.87249	-0.842679	-2.93425	2.78091	0.153339	0.000677847	0.490643	0.0210718	0.0408352	0.95566	0.00299645	0.662432	0.0953859	0.195794	0.983712
Pofut1	Pofut1	ENSMUSG00000046020	140484	2	protein O-fucosyltransferase 1 [Source:MGI Symbol;Acc:MGI:2153207]	6484	11.3019	4.87219	-1.57171	-3.75488	2.68903	1.06586	1.856e-22	0.000310301	1.68425e-15	3.97276e-09	0.0802598	3.49824e-20	0.00279424	7.08163e-13	5.10944e-07	0.316408
Rab43	Rab43	ENSMUSG00000030055	69834	6	RAB43, member RAS oncogene family [Source:MGI Symbol;Acc:MGI:1917084]	9033	9.57598	4.8644	1.32007	-3.50961	0.0347149	3.47489	2.11882e-05	0.186979	0.00103572	0.972159	0.0150303	0.000158542	0.350714	0.011255	0.98949	0.116102
Pim2	Pim2	ENSMUSG00000031155	18715	X	proviral integration site 2 [Source:MGI Symbol;Acc:MGI:97587]	8436	23.6407	4.85396	-1.12535	-3.4247	2.5546	0.870101	1.11976e-10	0.0829116	9.71859e-07	0.000195144	0.3438	3.09121e-09	0.200351	3.67625e-05	0.00507933	0.657181
Cdnf	Cdnf	ENSMUSG00000039496	227526	2	cerebral dopamine neurotrophic factor [Source:MGI Symbol;Acc:MGI:3606576]	10818	4.92825	4.85141	-3.25485	-3.16225	4.944	-1.78175	0.00296543	0.0244803	0.0283417	0.00252799	0.379978	0.0102233	0.0824202	0.116434	0.0321723	0.684546
Itgad	Itgad	ENSMUSG00000070369	381924	7	integrin, alpha D [Source:MGI Symbol;Acc:MGI:3578624]	8938	11.1575	4.8495	1.46151	-3.26028	0.127714	3.13256	3.08117e-08	0.0586058	5.50498e-05	0.868687	0.00423496	4.8257e-07	0.157841	0.00108433	0.945488	0.0501584
Cabyr	Cabyr	ENSMUSG00000024430	71132	18	calcium-binding tyrosine-(Y)-phosphorylation regulated (fibrousheathin 2) [Source:MGI Symbol;Acc:MGI:1918382]	9131	52.1044	4.84216	-1.84337	-2.87934	3.80619	-0.926853	0.000143921	0.098345	0.0129031	0.0017411	0.546144	0.000806641	0.225584	0.0674174	0.0247561	0.799318
Capn15	Capn15	ENSMUSG00000037326	50817	17	calpain 15 [Source:MGI Symbol;Acc:MGI:1355075]	7466	16.9681	4.84179	0.0478116	-3.76724	1.02675	2.74049	1.04171e-09	0.943937	5.45806e-07	0.137472	0.00512563	2.27304e-08	0.971134	2.21812e-05	0.397089	0.0567714
Noc4l	Noc4l	ENSMUSG00000033294	100608	5	NOC4 like [Source:MGI Symbol;Acc:MGI:2140843]	8960	21.2116	4.83941	-2.08036	-3.5916	3.32818	0.263419	3.68076e-08	0.00745156	1.29786e-05	5.4263e-05	0.808144	5.66743e-07	0.0334403	0.000326918	0.00182524	0.927141
Lsm4	Lsm4	ENSMUSG00000031848;ENSMUSG00000110900	50783	8	LSM4 homolog, U6 small nuclear RNA and mRNA degradation associated [Source:MGI Symbol;Acc:MGI:1354692]	4635	81.2241	4.83094	-0.658169	-3.93208	1.55703	2.37505	8.3017e-10	0.328827	1.7954e-07	0.023606	0.0136196	1.87122e-08	0.513744	8.7622e-06	0.139871	0.108951
St7	St7	ENSMUSG00000029534	64213	6	suppression of tumorigenicity 7 [Source:MGI Symbol;Acc:MGI:1927450]	6247	29.2344	4.82546	-0.09145	-3.74064	1.17627	2.56437	2.86464e-11	0.882834	5.32227e-08	0.062588	0.0040363	8.84638e-10	0.936459	3.25045e-06	0.25285	0.0487029
Eda2r	Eda2r	ENSMUSG00000034457	245527	X	ectodysplasin A2 receptor [Source:MGI Symbol;Acc:MGI:2442860]	10674	4.3131	4.82385	-1.11285	-3.64554	2.29115	1.35439	0.000257752	0.338799	0.00283381	0.0670514	0.440336	0.00132351	0.524387	0.0237389	0.262162	0.732217
Gdap1l1	Gdap1l1	ENSMUSG00000017943	228858	2	ganglioside-induced differentiation-associated protein 1-like 1 [Source:MGI Symbol;Acc:MGI:2385163]	10851	6.45333	4.82261	1.78749	-3.06133	-0.026223	3.08756	0.000715844	0.20411	0.014949	0.986468	0.137291	0.00313651	0.373506	0.0747247	0.995023	0.420528
Agfg2	Agfg2	ENSMUSG00000029722	231801	5	ArfGAP with FG repeats 2 [Source:MGI Symbol;Acc:MGI:2443267]	9522	15.6295	4.82105	2.16247	-2.89984	-0.24126	3.1411	3.47019e-05	0.0393911	0.00620692	0.814566	0.0312733	0.000238142	0.118206	0.04095	0.923335	0.184319
9430008C03Rik	9430008C03Rik					9777	11.2052	4.81403	0.144263	-3.18127	1.4885	1.69277	1.23195e-05	0.878724	0.00167842	0.129642	0.213564	9.96869e-05	0.934567	0.0162305	0.382727	0.524798
Zfp54	Zfp54	ENSMUSG00000023882	22712	17	zinc finger protein 54 [Source:MGI Symbol;Acc:MGI:99201]	8342	18.8474	4.80195	2.58777	-3.29176	-1.07757	4.36933	1.04439e-07	0.00188158	8.58553e-05	0.182276	0.000151862	1.43613e-06	0.0116475	0.00157478	0.461688	0.0045113
Lmln	Lmln	ENSMUSG00000022802	239833	16	leishmanolysin-like (metallopeptidase M8 family) [Source:MGI Symbol;Acc:MGI:2444736]	8665	11.4066	4.79487	0.359301	-3.33315	1.10242	2.23073	1.57897e-09	0.599743	6.2117e-06	0.116168	0.0231153	3.30675e-08	0.74913	0.000178385	0.359453	0.152503
Trim21	Trim21	ENSMUSG00000030966	20821	7	tripartite motif-containing 21 [Source:MGI Symbol;Acc:MGI:106657]	9364	14.1189	4.79285	-0.976363	-3.85612	1.91309	1.94302	0.00012545	0.366308	0.00121747	0.0857293	0.206003	0.000715773	0.549462	0.0127174	0.303082	0.513874
AU040972	AU040972	ENSMUSG00000091523		11	expressed sequence AU040972 [Source:MGI Symbol;Acc:MGI:2144426]	7245	55.7593	4.79124	0.435532	-3.37818	0.977533	2.40064	3.42145e-16	0.390186	6.51112e-10	0.0588512	0.000952471	2.46074e-14	0.571785	6.91064e-08	0.244693	0.0172964
1700030J22Rik	1700030J22Rik	ENSMUSG00000031847	69528	8	RIKEN cDNA 1700030J22 gene [Source:MGI Symbol;Acc:MGI:1916778]	10551	6.58259	4.78501	-1.5476	-1.8635	4.4691	-2.6056	0.00849828	0.320727	0.235716	0.0128011	0.241575	0.0245807	0.505506	0.44807	0.0940466	0.557395
Sergef	Sergef	ENSMUSG00000030839	27414	7	secretion regulating guanine nucleotide exchange factor [Source:MGI Symbol;Acc:MGI:1351630]	8699	31.2003	4.78274	3.82245	-2.73703	-1.77674	4.51377	2.41626e-08	6.02199e-06	0.000419899	0.0272593	5.10329e-05	3.8731e-07	0.00011196	0.00556431	0.15282	0.00190407
Tfap4	Tfap4	ENSMUSG00000005718	83383	16	transcription factor AP4 [Source:MGI Symbol;Acc:MGI:103239]	8966	19.8304	4.7801	0.491915	-4.06837	0.219815	3.84855	7.69166e-05	0.638114	0.000488997	0.834017	0.0114488	0.000468441	0.778801	0.00621594	0.930259	0.0968717
Kcnb1	Kcnb1	ENSMUSG00000050556	16500	2	potassium voltage gated channel, Shab-related subfamily, member 1 [Source:MGI Symbol;Acc:MGI:96666]	10244	2.6028	4.77959	4.87919	-2.22488	-2.32448	4.54936	0.000123357	0.000258402	0.0423608	0.0735213	0.00737213	0.000704934	0.0024206	0.152683	0.27544	0.0727366
Nudt16	Nudt16	ENSMUSG00000032565	75686	9	nudix (nucleoside diphosphate linked moiety X)-type motif 16 [Source:MGI Symbol;Acc:MGI:1922936]	4624	47.7707	4.77132	0.799677	-3.52955	0.442096	3.08745	6.38331e-11	0.203896	2.88089e-07	0.481907	0.000640019	1.87084e-09	0.373178	1.28024e-05	0.740148	0.0130292
Hinfp	Hinfp	ENSMUSG00000032119	102423	9	histone H4 transcription factor [Source:MGI Symbol;Acc:MGI:2429620]	8384	22.314	4.76936	2.05955	-2.97002	-0.260211	3.23023	3.9779e-06	0.0261113	0.00173837	0.772944	0.0123295	3.69782e-05	0.0865205	0.0166237	0.905534	0.101331
BC018242	BC018242					10751	7.19775	4.7564	1.05104	-2.6092	1.09616	1.51304	0.000608872	0.394595	0.031704	0.415326	0.418891	0.00275125	0.575872	0.125561	0.689976	0.715702
Naa10	Naa10	ENSMUSG00000031388	56292	X	N(alpha)-acetyltransferase 10, NatA catalytic subunit [Source:MGI Symbol;Acc:MGI:1915255]	4981	78.5004	4.74981	0.411054	-3.39609	0.942669	2.45342	1.21272e-25	0.293324	1.21307e-15	0.0176876	1.20594e-05	3.18865e-23	0.477673	5.30453e-13	0.115164	0.000576751
Dph7	Dph7	ENSMUSG00000026975	67228	2	diphthamine biosynethesis 7 [Source:MGI Symbol;Acc:MGI:1914478]	7405	18.4814	4.74096	0.400849	-3.56162	0.778491	2.78313	9.68221e-07	0.630212	9.75231e-05	0.354023	0.0201469	1.07567e-05	0.772189	0.00174774	0.639172	0.138957
Adarb1	Adarb1	ENSMUSG00000020262	110532	10	adenosine deaminase, RNA-specific, B1 [Source:MGI Symbol;Acc:MGI:891999]	10197	4.56904	4.73722	0.260238	-2.9714	1.50558	1.46581	0.000126491	0.807146	0.00838214	0.176498	0.342103	0.000720959	0.889621	0.050204	0.453347	0.654968
Atf5	Atf5	ENSMUSG00000038539	107503	7	activating transcription factor 5 [Source:MGI Symbol;Acc:MGI:2141857]	10678	11.3376	4.73605	-1.85031	-3.14648	3.43988	-0.293403	0.000749812	0.131607	0.0131938	0.0111087	0.849404	0.00326441	0.276417	0.0684875	0.0854614	0.945174
Snora23	Snora23	ENSMUSG00000064451		7	small nucleolar RNA, H/ACA box 23 [Source:MGI Symbol;Acc:MGI:3819494]	10486	129.883	4.73323	-0.876455	-2.98258	2.62711	0.355468	0.00125937	0.487994	0.0254778	0.0536682	0.855121	0.00498457	0.659997	0.109182	0.230079	0.947461
Elavl2	Elavl2	ENSMUSG00000008489	15569	4	ELAV (embryonic lethal, abnormal vision, Drosophila)-like 2 (Hu antigen B) [Source:MGI Symbol;Acc:MGI:1100887]	8950	11.7566	4.72694	-0.920502	-3.70137	1.94607	1.7553	1.5143e-06	0.279939	7.29028e-05	0.0271037	0.147002	1.58871e-05	0.464455	0.00136468	0.152416	0.436366
Gadd45a	Gadd45a	ENSMUSG00000036390	13197	6	growth arrest and DNA-damage-inducible 45 alpha [Source:MGI Symbol;Acc:MGI:107799]	9539	30.5208	4.72577	-1.99639	-3.51067	3.2115	0.299174	1.88455e-05	0.0415831	0.000714943	0.00193443	0.827747	0.000144271	0.123094	0.00847696	0.0267348	0.935972
Zfp493	Zfp493	ENSMUSG00000090659	72958	13	zinc finger protein 493 [Source:MGI Symbol;Acc:MGI:1920208]	5695	21.1544	4.72199	-0.827374	-3.7644	1.78496	1.97944	1.54454e-13	0.134442	6.81276e-10	0.00166308	0.0117067	6.83601e-12	0.279969	7.16126e-08	0.0240805	0.0981424
4930593A02Rik	4930593A02Rik	ENSMUSG00000097725		3	RIKEN cDNA 4930593A02 gene [Source:MGI Symbol;Acc:MGI:1923132]	10242	30.6681	4.71706	-0.643539	-3.84034	1.52026	2.32008	0.000469592	0.584138	0.00283876	0.209218	0.170532	0.0022046	0.73671	0.0237621	0.495199	0.46979
Hook1	Hook1	ENSMUSG00000028572	77963	4	hook microtubule tethering protein 1 [Source:MGI Symbol;Acc:MGI:1925213]	8669	11.0581	4.71033	1.79309	-3.11708	-0.199839	3.31692	7.31403e-09	0.0141644	3.42236e-05	0.782421	0.00124443	1.32458e-07	0.0547156	0.000721206	0.908892	0.020994
Slc5a11	Slc5a11	ENSMUSG00000030769	233836	7	solute carrier family 5 (sodium/glucose cotransporter), member 11 [Source:MGI Symbol;Acc:MGI:1919316]	8001	22.345	4.70232	1.20853	-3.12754	0.36625	2.76129	2.12455e-12	0.0402325	4.27347e-07	0.536034	0.000964739	7.89986e-11	0.120137	1.80396e-05	0.77821	0.0174323
Asb5	Asb5	ENSMUSG00000031519	76294	8	ankyrin repeat and SOCs box-containing 5 [Source:MGI Symbol;Acc:MGI:1923544]	8241	30.4242	4.70112	4.13148	-1.49739	-0.927748	2.42514	2.37916e-05	0.000147701	0.122678	0.345829	0.0790752	0.000174674	0.00153926	0.300294	0.633585	0.314346
Xrcc6bp1	Xrcc6bp1					10838	16.0723	4.70045	-3.72535	-3.4625	4.9633	-1.5008	0.00171834	0.00609444	0.0103203	0.00098301	0.439207	0.00647128	0.0289294	0.0576207	0.016302	0.731893
Pcdhb2	Pcdhb2	ENSMUSG00000051599	93873	18	protocadherin beta 2 [Source:MGI Symbol;Acc:MGI:2136735]	10344	8.55325	4.69465	-0.349285	-1.68395	3.35999	-1.67604	0.00850458	0.818164	0.278649	0.0463132	0.439311	0.0245893	0.896641	0.494111	0.210705	0.731893
Recql4	Recql4	ENSMUSG00000033762	79456	15	RecQ protein-like 4 [Source:MGI Symbol;Acc:MGI:1931028]	10345	6.9861	4.69276	-1.80809	-3.02552	3.47534	-0.449822	0.000805146	0.141473	0.0181433	0.00922741	0.786705	0.0034622	0.290166	0.0860863	0.0755611	0.918208
Cep41	Cep41	ENSMUSG00000029790	83922	6	centrosomal protein 41 [Source:MGI Symbol;Acc:MGI:1891414]	7228	17.4405	4.68978	1.58339	-2.77252	0.333875	2.43865	2.60572e-10	0.0156772	4.22735e-05	0.606488	0.00798713	6.60922e-09	0.0591179	0.000858985	0.826596	0.0766596
Mblac1	Mblac1	ENSMUSG00000049285	330216	5	metallo-beta-lactamase domain containing 1 [Source:MGI Symbol;Acc:MGI:2679717]	10183	22.8631	4.68755	-1.44852	-3.38176	2.75431	0.627455	0.000115141	0.173606	0.00283361	0.0147608	0.68169	0.000665289	0.333719	0.0237389	0.102065	0.871301
9430015G10Rik	9430015G10Rik	ENSMUSG00000059939	230996	4	RIKEN cDNA 9430015G10 gene [Source:MGI Symbol;Acc:MGI:2444364]	6051	26.7503	4.68524	-0.44941	-3.61243	1.52222	2.0902	1.00738e-15	0.372398	6.73478e-11	0.00322499	0.00368682	6.84018e-14	0.555989	9.31958e-09	0.0381554	0.046062
Rdh12	Rdh12	ENSMUSG00000021123	77974	12	retinol dehydrogenase 12 [Source:MGI Symbol;Acc:MGI:1925224]	8506	28.6013	4.68449	-0.882393	-3.38056	2.18633	1.19423	3.686e-08	0.23117	2.22423e-05	0.00448647	0.253226	5.66743e-07	0.407868	0.000510825	0.0485605	0.568427
Chmp6	Chmp6	ENSMUSG00000025371	208092	11	charged multivesicular body protein 6 [Source:MGI Symbol;Acc:MGI:3583942]	9026	26.5733	4.67577	1.57322	-3.77408	-0.671541	4.44562	9.52078e-05	0.140839	0.000989198	0.524873	0.00376035	0.000561491	0.289527	0.0108247	0.771559	0.0466391
Cdh13	Cdh13	ENSMUSG00000031841	12554	8	cadherin 13 [Source:MGI Symbol;Acc:MGI:99551]	9615	15.5488	4.67376	2.5692	-3.53437	-1.42981	4.96418	0.000461362	0.0388068	0.005074	0.238789	0.00427572	0.0021721	0.116644	0.0356943	0.532308	0.0503827
Gas6	Gas6	ENSMUSG00000031451	14456	8	growth arrest specific 6 [Source:MGI Symbol;Acc:MGI:95660]	8635	18.2615	4.67308	0.330335	-3.40856	0.934184	2.47438	1.79596e-08	0.646144	1.20534e-05	0.20234	0.0165824	2.97476e-07	0.784686	0.000307869	0.486364	0.122762
Asb13	Asb13	ENSMUSG00000033781	142688	13	ankyrin repeat and SOCS box-containing 13 [Source:MGI Symbol;Acc:MGI:2145525]	10304	10.9162	4.67229	4.17718	-3.12401	-2.62889	5.7529	0.000935613	0.00499857	0.0165688	0.0715909	0.0031962	0.003927	0.0249176	0.080952	0.27158	0.0418956
Tmub1	Tmub1	ENSMUSG00000028958	64295	5	transmembrane and ubiquitin-like domain containing 1 [Source:MGI Symbol;Acc:MGI:1923764]	10011	24.7263	4.66899	-1.85796	-3.70095	2.82599	0.874967	6.75348e-05	0.0742844	0.00087679	0.00948474	0.549239	0.000420199	0.186171	0.00988598	0.0772925	0.801397
Pip5k1c	Pip5k1c	ENSMUSG00000034902	18717	10	phosphatidylinositol-4-phosphate 5-kinase, type 1 gamma [Source:MGI Symbol;Acc:MGI:1298224]	7520	13.1387	4.65887	-1.20523	-3.73043	2.13367	1.59677	1.87373e-11	0.0468292	1.7453e-08	0.000658625	0.061678	6.00692e-10	0.134436	1.21526e-06	0.0122451	0.273769
Gpc1	Gpc1	ENSMUSG00000034220	14733	1	glypican 1 [Source:MGI Symbol;Acc:MGI:1194891]	4132	23.9102	4.65003	-0.0042844	-3.46051	1.19381	2.26669	1.32297e-24	0.991271	6.73429e-16	0.00277227	5.34587e-05	2.95158e-22	0.995917	3.34481e-13	0.0341674	0.00197438
Dennd2d	Dennd2d	ENSMUSG00000027901	72121	3	DENN/MADD domain containing 2D [Source:MGI Symbol;Acc:MGI:2181193]	9863	8.64005	4.64388	1.4663	-2.86798	0.309604	2.55838	2.43572e-05	0.134492	0.00436381	0.75325	0.0646519	0.000178467	0.279997	0.0321464	0.898374	0.281198
Tiam1	Tiam1	ENSMUSG00000002489	21844	16	T cell lymphoma invasion and metastasis 1 [Source:MGI Symbol;Acc:MGI:103306]	9126	5.95671	4.63859	1.58353	-3.0103	0.04475	2.96555	7.95928e-07	0.0588953	0.000516288	0.957175	0.012116	9.0621e-06	0.158387	0.00651495	0.984553	0.100267
Vac14	Vac14	ENSMUSG00000010936	234729	8	Vac14 homolog (S. cerevisiae) [Source:MGI Symbol;Acc:MGI:2157980]	6009	22.0948	4.63104	0.215406	-3.35547	1.06016	2.2953	3.39299e-13	0.695118	2.0129e-08	0.0576806	0.00355818	1.41035e-11	0.818773	1.36677e-06	0.242044	0.0450208
Gatsl2	Gatsl2	ENSMUSG00000015944	80909	5	GATS protein-like 2 [Source:MGI Symbol;Acc:MGI:1933384]	5221	15.4555	4.6307	0.571362	-3.41189	0.64744	2.76445	1.70229e-14	0.27473	2.02363e-09	0.218553	0.000230876	9.35149e-13	0.458457	1.8908e-07	0.506341	0.00626287
Mrgbp	Mrgbp	ENSMUSG00000027569	73247	2	MRG/MORF4L binding protein [Source:MGI Symbol;Acc:MGI:1920497]	8782	38.4969	4.62938	-1.26892	-3.96251	1.93579	2.02673	6.57624e-06	0.159063	6.62057e-05	0.0356964	0.110935	5.74672e-05	0.314672	0.00125653	0.180163	0.373497
Hells	Hells	ENSMUSG00000025001	15201	19	helicase, lymphoid specific [Source:MGI Symbol;Acc:MGI:106209]	10306	9.28382	4.62795	4.18592	-2.21756	-1.77553	3.9931	0.000205765	0.00115558	0.0447789	0.157943	0.0169509	0.00109514	0.00799038	0.15867	0.42802	0.124367
Bend6	Bend6	ENSMUSG00000042182	320705	1	BEN domain containing 6 [Source:MGI Symbol;Acc:MGI:2444572]	9922	12.7752	4.62776	-4.2228	-3.54747	5.30308	-1.7556	0.000231612	0.000526056	0.00271555	4.12919e-05	0.260722	0.00121613	0.0042789	0.0229771	0.00149968	0.576732
Pycrl	Pycrl	ENSMUSG00000022571	66194	15	pyrroline-5-carboxylate reductase-like [Source:MGI Symbol;Acc:MGI:1913444]	8397	35.8789	4.61764	-0.93513	-3.93768	1.61509	2.32259	1.99837e-06	0.269645	2.74286e-05	0.0615163	0.0540033	2.03599e-05	0.452804	0.000604687	0.249973	0.256028
Rpusd1	Rpusd1	ENSMUSG00000041199	106707	17	RNA pseudouridylate synthase domain containing 1 [Source:MGI Symbol;Acc:MGI:1919186]	10235	17.2717	4.61055	1.50752	-2.60475	0.498277	2.10648	0.000224498	0.176293	0.0210175	0.659087	0.181765	0.00118257	0.337164	0.0952977	0.853841	0.483232
Sema4g	Sema4g	ENSMUSG00000025207	26456	19	sema domain, immunoglobulin domain (Ig), transmembrane domain (TM) and short cytoplasmic domain, (semaphorin) 4G [Source:MGI Symbol;Acc:MGI:1347047]	9359	9.31443	4.60695	1.60026	-2.54647	0.460228	2.08624	9.63921e-06	0.0836422	0.00691829	0.617536	0.107685	8.0317e-05	0.201538	0.0441769	0.833157	0.368041
Knstrn	Knstrn	ENSMUSG00000027331	51944	2	kinetochore-localized astrin/SPAG5 binding [Source:MGI Symbol;Acc:MGI:1289298]	8926	14.264	4.6064	2.00541	-3.15522	-0.554233	3.70945	1.46326e-05	0.0370562	0.00144337	0.55603	0.00599302	0.000115664	0.112652	0.0144496	0.794331	0.0633002
Tufm	Tufm	ENSMUSG00000073838	233870	7	Tu translation elongation factor, mitochondrial [Source:MGI Symbol;Acc:MGI:1923686]	8350	27.9872	4.60171	0.685926	-3.32906	0.586723	2.74234	5.78275e-09	0.320591	7.18047e-06	0.400106	0.00557487	1.06785e-07	0.505445	0.000200578	0.676455	0.0603411
Atad2	Atad2	ENSMUSG00000022360	70472	15	ATPase family, AAA domain containing 2 [Source:MGI Symbol;Acc:MGI:1917722]	7801	9.29967	4.59982	2.59159	-3.04894	-1.0407	4.08964	7.64676e-09	0.00045316	3.67574e-05	0.145482	6.08518e-05	1.37945e-07	0.0038254	0.000761046	0.408111	0.00218356
Shb	Shb	ENSMUSG00000044813	230126	4	src homology 2 domain-containing transforming protein B [Source:MGI Symbol;Acc:MGI:98294]	5865	24.8572	4.5967	1.60242	-3.08249	-0.0882121	3.1707	1.92884e-16	0.00128103	2.92367e-09	0.857409	6.33893e-06	1.47455e-14	0.00867132	2.64146e-07	0.941468	0.000339692
C030039L03Rik	C030039L03Rik					6995	12.8629	4.59397	-0.979891	-3.75988	1.81398	1.9459	7.03192e-09	0.156661	7.90217e-07	0.0105008	0.0470853	1.27908e-07	0.311658	3.05253e-05	0.0820545	0.235521
Ttc26	Ttc26	ENSMUSG00000056832	264134	6	tetratricopeptide repeat domain 26 [Source:MGI Symbol;Acc:MGI:2444853]	10009	6.67459	4.58921	2.94639	-2.91308	-1.27026	4.18333	0.0105147	0.0804106	0.0785746	0.430621	0.069194	0.0292857	0.19591	0.227725	0.702451	0.292057
BC051142	BC051142	ENSMUSG00000057246	407788	17	cDNA sequence BC051142 [Source:MGI Symbol;Acc:MGI:3039565]	10149	19.4259	4.58408	-0.868806	-2.96063	2.49225	0.468381	0.000254855	0.424592	0.0102136	0.0313064	0.76753	0.0013111	0.60328	0.0572882	0.166298	0.912026
Slc16a13	Slc16a13	ENSMUSG00000044367	69309	11	solute carrier family 16 (monocarboxylic acid transporters), member 13 [Source:MGI Symbol;Acc:MGI:1916559]	10567	7.53179	4.58212	-4.13064	-3.42524	5.28753	-1.86229	0.00194943	0.00334758	0.0124895	0.000488507	0.319243	0.00719973	0.0181617	0.0658142	0.00990789	0.632813
Sco2	Sco2	ENSMUSG00000091780	100126824	15	SCO2 cytochrome c oxidase assembly protein [Source:MGI Symbol;Acc:MGI:3818630]	10362	18.2456	4.58096	-4.56518	-3.29835	5.84778	-2.54943	0.00194902	0.00151038	0.0158191	0.000165801	0.172229	0.00719973	0.00984586	0.0778632	0.00446437	0.471194
Rps27a	Rps27a	ENSMUSG00000020460	78294	11	ribosomal protein S27A [Source:MGI Symbol;Acc:MGI:1925544]	10330	33.6012	4.57804	2.16693	-2.41095	0.000166868	2.41078	0.00037903	0.0669841	0.0367149	0.999887	0.142752	0.001831	0.17284	0.137914	0.99999	0.42936
Ptges2	Ptges2	ENSMUSG00000026820	96979	2	prostaglandin E synthase 2 [Source:MGI Symbol;Acc:MGI:1917592]	7662	28.577	4.57712	0.314708	-3.28772	0.974699	2.31302	1.38608e-12	0.575492	5.70063e-08	0.0887234	0.00407151	5.27968e-11	0.73077	3.46219e-06	0.309039	0.0488946
Ankrd54	Ankrd54	ENSMUSG00000033055	223690	15	ankyrin repeat domain 54 [Source:MGI Symbol;Acc:MGI:2444209]	9369	21.7774	4.57391	1.92364	-2.63984	0.0104224	2.62942	3.5453e-05	0.0535058	0.00883206	0.99151	0.0580957	0.000242536	0.14797	0.0519097	0.997556	0.265178
Eif4e3	Eif4e3	ENSMUSG00000093661	66892	6	eukaryotic translation initiation factor 4E member 3 [Source:MGI Symbol;Acc:MGI:1914142]	8413	18.8753	4.56901	0.253658	-2.85973	1.45562	1.40411	2.30188e-05	0.785657	0.00405955	0.128125	0.290927	0.000170258	0.876429	0.030564	0.380831	0.606351
Trp53cor1	Trp53cor1	ENSMUSG00000085912		17	tumor protein p53 pathway corepressor 1 [Source:MGI Symbol;Acc:MGI:3801771]	10792	6.06361	4.56522	0.0560101	-3.03173	1.47748	1.55425	0.000694223	0.962945	0.0125396	0.260256	0.399032	0.00305401	0.981348	0.0660002	0.553386	0.699298
Cox19	Cox19	ENSMUSG00000045438	68033	5	cytochrome c oxidase assembly protein 19 [Source:MGI Symbol;Acc:MGI:1915283]	7707	68.1844	4.54983	-1.13128	-4.23382	1.44729	2.78653	7.89412e-05	0.262813	0.000190801	0.155478	0.0526366	0.000478373	0.444473	0.00297551	0.424073	0.25249
Slit2	Slit2	ENSMUSG00000031558	20563	5	slit homolog 2 (Drosophila) [Source:MGI Symbol;Acc:MGI:1315205]	9309	4.91544	4.54954	-0.812807	-3.28639	2.07596	1.21043	1.97085e-06	0.329607	0.000249194	0.0169588	0.307615	2.01171e-05	0.514605	0.00367262	0.11236	0.620451
Cyp4v3	Cyp4v3	ENSMUSG00000079057	102294	8	cytochrome P450, family 4, subfamily v, polypeptide 3 [Source:MGI Symbol;Acc:MGI:2142763]	9990	8.58622	4.54878	-4.85035	-3.40997	5.98916	-2.57919	0.00116109	0.000516843	0.00939106	5.67428e-05	0.14312	0.00467689	0.00422626	0.0541758	0.0019028	0.42936
Ttbk1	Ttbk1	ENSMUSG00000015599	106763	17	tau tubulin kinase 1 [Source:MGI Symbol;Acc:MGI:2147036]	6274	9.49303	4.54859	-0.712346	-3.58139	1.67955	1.90184	2.90847e-14	0.171549	3.40164e-10	0.00168571	0.0102723	1.551e-12	0.330871	3.83369e-08	0.0242796	0.0897658
Get4	Get4	ENSMUSG00000025858	67604	5	golgi to ER traffic protein 4 [Source:MGI Symbol;Acc:MGI:1914854]	5978	32.1484	4.54537	-0.190338	-3.64144	1.09426	2.54718	1.34425e-10	0.756382	7.59946e-08	0.0787487	0.00383707	3.61065e-09	0.856956	4.30452e-06	0.287439	0.0471313
Cd46	Cd46	ENSMUSG00000016493	17221	1	CD46 antigen, complement regulatory protein [Source:MGI Symbol;Acc:MGI:1203290]	9985	27.5636	4.5415	2.23674	-2.77227	-0.467518	3.23979	6.09813e-05	0.0328641	0.00748848	0.651766	0.0257198	0.000386015	0.102065	0.0465601	0.850851	0.161957
Unc80	Unc80	ENSMUSG00000055567	329178	1	unc-80, NALCN activator [Source:MGI Symbol;Acc:MGI:2652882]	9000	3.22531	4.53957	1.35413	-2.75532	0.430118	2.3252	4.02647e-06	0.120329	0.00229693	0.620908	0.0587244	3.7336e-05	0.259328	0.0203561	0.834596	0.266601
Hexb	Hexb	ENSMUSG00000021665	15212	13	hexosaminidase B [Source:MGI Symbol;Acc:MGI:96074]	4181	43.3933	4.53832	-0.145507	-3.60016	1.08367	2.51649	4.28166e-10	0.817006	2.21706e-07	0.0888501	0.00531396	1.02647e-08	0.896019	1.02913e-05	0.309039	0.0581676
Mtbp	Mtbp	ENSMUSG00000022369	105837	15	Mdm2, transformed 3T3 cell double minute p53 binding protein [Source:MGI Symbol;Acc:MGI:2146005]	8041	15.5164	4.53519	1.49089	-2.90832	0.135977	2.77234	5.12074e-12	0.0111372	1.61705e-06	0.816399	0.000813733	1.7828e-10	0.0455488	5.73948e-05	0.924318	0.0154345
Fbxl12os	Fbxl12os	ENSMUSG00000062470		9	F-box and leucine-rich repeat protein 12, opposite strand [Source:MGI Symbol;Acc:MGI:1913912]	10772	7.32512	4.53191	-3.16121	-3.37539	4.31773	-0.942343	0.0013146	0.0141248	0.00913502	0.00210349	0.593346	0.00516449	0.0546204	0.0530909	0.0285302	0.827354
Cdc42ep4	Cdc42ep4	ENSMUSG00000041598	56699	11	CDC42 effector protein (Rho GTPase binding) 4 [Source:MGI Symbol;Acc:MGI:1929760]	8138	17.5968	4.5265	-1.5999	-3.58143	2.54498	1.03645	1.32936e-10	0.0104995	9.58676e-08	8.99988e-05	0.23473	3.58829e-09	0.0435436	5.26646e-06	0.00271184	0.548305
Ndufaf6	Ndufaf6	ENSMUSG00000050323	76947	4	NADH dehydrogenase (ubiquinone) complex I, assembly factor 6 [Source:MGI Symbol;Acc:MGI:1924197]	9391	37.7643	4.52284	-0.432609	-3.26755	1.6879	1.57965	5.13538e-06	0.616323	0.000449424	0.0589321	0.200651	4.6282e-05	0.76196	0.005846	0.244693	0.50727
Cpq	Cpq	ENSMUSG00000039007	54381	15	carboxypeptidase Q [Source:MGI Symbol;Acc:MGI:1889205]	8233	25.1111	4.51554	-0.10812	-3.33725	1.2864	2.05085	4.15135e-08	0.879909	1.73892e-05	0.0788893	0.0452901	6.3295e-07	0.934898	0.000415175	0.28776	0.230606
Pxmp2	Pxmp2	ENSMUSG00000029499	19301	5	peroxisomal membrane protein 2 [Source:MGI Symbol;Acc:MGI:107487]	8408	48.7997	4.51114	0.481813	-3.29442	0.734901	2.55952	1.1576e-08	0.485954	9.57274e-06	0.29406	0.0098216	2.02155e-07	0.658029	0.000253388	0.586939	0.0873635
Siah1b	Siah1b	ENSMUSG00000040749	20438	X	seven in absentia 1B [Source:MGI Symbol;Acc:MGI:108063]	8709	26.5431	4.50825	-0.908418	-3.68708	1.72959	1.95749	3.51767e-05	0.340597	0.000426056	0.0762868	0.148023	0.000240947	0.526276	0.00561221	0.281651	0.437397
Hmbs	Hmbs	ENSMUSG00000032126	15288	9	hydroxymethylbilane synthase [Source:MGI Symbol;Acc:MGI:96112]	6847	39.6019	4.50456	-0.0646755	-3.51837	1.05087	2.4675	8.24831e-10	0.919203	4.83913e-07	0.104476	0.00701041	1.86303e-08	0.957478	2.01146e-05	0.339514	0.0706303
Filip1	Filip1	ENSMUSG00000034898	70598	9	filamin A interacting protein 1 [Source:MGI Symbol;Acc:MGI:1917848]	10699	3.8767	4.50367	-3.41059	-2.61892	5.29533	-2.67642	0.00641694	0.0234105	0.073755	0.00179209	0.198586	0.0195404	0.0796772	0.21842	0.0252402	0.505429
Strada	Strada	ENSMUSG00000069631	72149	11	STE20-related kinase adaptor alpha [Source:MGI Symbol;Acc:MGI:1919399]	7712	22.9868	4.49885	0.216506	-3.34968	0.932666	2.41702	3.53597e-10	0.729106	7.66616e-07	0.141904	0.00702298	8.6284e-09	0.841489	2.98244e-05	0.402919	0.0706303
Fance	Fance	ENSMUSG00000007570		17	Fanconi anemia, complementation group E [Source:MGI Symbol;Acc:MGI:1920025]	9938	16.5292	4.49803	0.9568	-2.21503	1.3262	0.888828	0.00433547	0.487414	0.118699	0.344565	0.650227	0.0140806	0.659539	0.294418	0.632629	0.854439
Rab32	Rab32	ENSMUSG00000019832	67844	10	RAB32, member RAS oncogene family [Source:MGI Symbol;Acc:MGI:1915094]	9674	13.1344	4.49764	-5.27662	-3.53362	6.24064	-2.70702	0.000469678	5.89558e-05	0.00369949	6.55004e-06	0.0957899	0.0022046	0.000730731	0.0287825	0.00033936	0.348431
Uba52	Uba52	ENSMUSG00000090137	22186	8	ubiquitin A-52 residue ribosomal protein fusion product 1 [Source:MGI Symbol;Acc:MGI:98887]	7556	112.761	4.48178	-1.04995	-3.43949	2.09223	1.34726	4.77575e-09	0.117869	2.24602e-06	0.0025847	0.154896	8.97052e-08	0.255461	7.70686e-05	0.032553	0.446904
Mccc2	Mccc2	ENSMUSG00000021646	78038	13	methylcrotonoyl-Coenzyme A carboxylase 2 (beta) [Source:MGI Symbol;Acc:MGI:1925288]	7039	27.8405	4.47565	-1.37108	-3.50117	2.34557	1.1556	2.86533e-10	0.0287384	2.26828e-07	0.000302729	0.187715	7.13527e-09	0.0926751	1.04188e-05	0.00690904	0.490954
Pon3	Pon3	ENSMUSG00000029759	269823	6	paraoxonase 3 [Source:MGI Symbol;Acc:MGI:106686]	9458	21.9	4.46609	4.12692	-1.92265	-1.58348	3.50613	4.11943e-05	0.000160974	0.0475378	0.120893	0.0127512	0.000275604	0.00164772	0.165083	0.368545	0.104027
Smad3	Smad3	ENSMUSG00000032402	17127	9	SMAD family member 3 [Source:MGI Symbol;Acc:MGI:1201674]	8076	10.2016	4.46604	-0.297204	-3.47625	1.287	2.18925	3.6997e-08	0.674452	6.80452e-06	0.0747876	0.0306446	5.6739e-07	0.805272	0.000192214	0.278182	0.182047
Prss36	Prss36	ENSMUSG00000070371	77613	7	protease, serine 36 [Source:MGI Symbol;Acc:MGI:1924863]	10728	6.30073	4.46575	-0.699541	-2.40381	2.76148	-0.357673	0.00238366	0.580935	0.0650642	0.0493317	0.828944	0.00855768	0.734195	0.202487	0.219006	0.935972
Top3a	Top3a	ENSMUSG00000002814	21975	11	topoisomerase (DNA) III alpha [Source:MGI Symbol;Acc:MGI:1197527]	9317	11.0539	4.45638	0.0883956	-3.30246	1.06553	2.23693	7.03988e-06	0.918808	0.000419919	0.228594	0.0721681	6.07418e-05	0.957225	0.00556431	0.519432	0.299068
Il11ra1	Il11ra1	ENSMUSG00000073889	16157	4	interleukin 11 receptor, alpha chain 1 [Source:MGI Symbol;Acc:MGI:107426]	10867	8.92141	4.44971	0.336541	-2.32414	1.78903	0.535102	0.00272049	0.796085	0.0712222	0.221292	0.817577	0.00954748	0.882484	0.213927	0.50962	0.931598
Fdx1l	Fdx1l	ENSMUSG00000079677	68165	9	ferredoxin 1-like [Source:MGI Symbol;Acc:MGI:1915415]	10689	21.4999	4.44818	-2.50397	-2.55596	4.39619	-1.84024	0.00844852	0.0977303	0.0913886	0.00913334	0.37884	0.024479	0.22464	0.250023	0.0748866	0.684029
Kif11	Kif11	ENSMUSG00000012443;ENSMUSG00000111220	16551	19	kinesin family member 11 [Source:MGI Symbol;Acc:MGI:1098231]	9199	8.85317	4.44222	0.820621	-3.26705	0.354553	2.9125	7.20811e-05	0.405155	0.0019901	0.719776	0.0392028	0.000444439	0.585976	0.0183379	0.882129	0.21256
4933406C10Rik	4933406C10Rik	ENSMUSG00000097494		12	RIKEN cDNA 4933406C10 gene [Source:MGI Symbol;Acc:MGI:1921326]	10474	15.6141	4.43313	4.4519	-1.78324	-1.80202	3.58526	0.00100206	0.00172651	0.132282	0.193014	0.0492324	0.00416155	0.0108551	0.314577	0.475025	0.242363
Lpcat4	Lpcat4	ENSMUSG00000027134	99010	2	lysophosphatidylcholine acyltransferase 4 [Source:MGI Symbol;Acc:MGI:2138993]	7037	31.0063	4.42238	0.217025	-3.43436	0.770995	2.66337	4.05833e-08	0.757646	7.78781e-06	0.277485	0.00842137	6.19632e-07	0.857234	0.000213801	0.571034	0.0793793
Bnip1	Bnip1	ENSMUSG00000024191	224630	17	BCL2/adenovirus E1B interacting protein 1 [Source:MGI Symbol;Acc:MGI:109328]	8446	43.6901	4.40828	-0.188429	-3.78776	0.808946	2.97881	6.23831e-05	0.844757	0.000390813	0.404631	0.0319195	0.000393748	0.913802	0.00525506	0.67969	0.186935
Syne3	Syne3	ENSMUSG00000054150	212073	12	spectrin repeat containing, nuclear envelope family member 3 [Source:MGI Symbol;Acc:MGI:2442408]	5860	13.5243	4.40002	0.186563	-3.44756	0.765893	2.68167	1.92288e-10	0.757141	1.75751e-07	0.208213	0.00198888	4.98127e-09	0.857234	8.61576e-06	0.493493	0.0294584
Glis2	Glis2	ENSMUSG00000014303	83396	16	GLIS family zinc finger 2 [Source:MGI Symbol;Acc:MGI:1932535]	9349	10.1322	4.39146	-2.291	-1.94099	4.74147	-2.80048	0.00176793	0.071752	0.122562	0.000892917	0.11162	0.00662791	0.181237	0.300112	0.0153189	0.374189
Ly96	Ly96	ENSMUSG00000025779	17087	1	lymphocyte antigen 96 [Source:MGI Symbol;Acc:MGI:1341909]	8231	93.3231	4.38837	2.40558	-2.67092	-0.688128	3.35905	3.39321e-10	0.00022008	3.30117e-05	0.278082	0.000178087	8.31717e-09	0.00212536	0.000699388	0.571448	0.00516404
Lad1	Lad1	ENSMUSG00000041782	16763	1	ladinin [Source:MGI Symbol;Acc:MGI:109343]	10166	10.111	4.38753	3.19167	-1.96472	-0.768855	2.73357	0.000733296	0.010815	0.0904104	0.522912	0.101517	0.00320143	0.0445645	0.248403	0.770207	0.357879
Sorbs2	Sorbs2	ENSMUSG00000031626	234214	8	sorbin and SH3 domain containing 2 [Source:MGI Symbol;Acc:MGI:1924574]	7940	8.39694	4.38678	-2.80238	-3.95811	3.23105	0.727062	5.50808e-06	0.00181931	2.80178e-05	0.000424025	0.543338	4.9235e-05	0.0113197	0.00061014	0.00885834	0.796429
Chpf	Chpf	ENSMUSG00000032997	74241	1	chondroitin polymerizing factor [Source:MGI Symbol;Acc:MGI:106576]	10650	6.9932	4.38633	3.35498	-1.98784	-0.956493	2.94434	0.000949969	0.0122731	0.088372	0.48395	0.10268	0.00397743	0.049081	0.244764	0.741583	0.360004
Camkk2	Camkk2	ENSMUSG00000029471	207565	5	calcium/calmodulin-dependent protein kinase kinase 2, beta [Source:MGI Symbol;Acc:MGI:2444812]	8090	9.22435	4.37837	1.42172	-1.86055	1.09609	0.76446	0.00611906	0.315666	0.194298	0.436868	0.698618	0.0188062	0.500486	0.400692	0.70786	0.878475
Pin4	Pin4	ENSMUSG00000079480	69713;105247253	X	protein (peptidyl-prolyl cis/trans isomerase) NIMA-interacting, 4 (parvulin) [Source:MGI Symbol;Acc:MGI:1916963]	9149	91.8142	4.37545	-0.650918	-3.26535	1.76103	1.50432	1.09633e-06	0.408977	0.000120235	0.0306136	0.180236	1.20333e-05	0.589133	0.00207464	0.164618	0.480336
Fjx1	Fjx1	ENSMUSG00000075012	14221	2	four jointed box 1 (Drosophila) [Source:MGI Symbol;Acc:MGI:1341907]	10105	13.2191	4.37342	0.791192	-3.07458	0.507643	2.56694	0.0020174	0.527926	0.0206446	0.687901	0.152661	0.00741317	0.694332	0.0943508	0.866259	0.4435
Dsn1	Dsn1	ENSMUSG00000027635	66934	2	DSN1 homolog, MIS12 kinetochore complex component [Source:MGI Symbol;Acc:MGI:1914184]	9903	15.2503	4.37048	-0.622946	-2.72076	2.27267	0.448086	0.000253582	0.550681	0.0134972	0.0390329	0.765992	0.00130639	0.711758	0.0695808	0.191006	0.911339
Armc7	Armc7	ENSMUSG00000057219	276905	11	armadillo repeat containing 7 [Source:MGI Symbol;Acc:MGI:2679719]	9113	19.516	4.36595	1.02395	-2.95855	0.38345	2.5751	8.19316e-07	0.193535	0.000342804	0.627954	0.0215336	9.25286e-06	0.359267	0.00473772	0.838294	0.145043
Cmya5	Cmya5	ENSMUSG00000047419	76469	13	cardiomyopathy associated 5 [Source:MGI Symbol;Acc:MGI:1923719]	10665	1.79559	4.36582	6.11856	-1.61152	-3.36425	4.97577	0.000794538	0.000197233	0.151974	0.0506985	0.0155247	0.00342495	0.00193376	0.344614	0.223047	0.1186
Agk	Agk	ENSMUSG00000029916	69923	6	acylglycerol kinase [Source:MGI Symbol;Acc:MGI:1917173]	10559	8.00111	4.36438	-3.39934	-2.58772	5.176	-2.58828	0.010761	0.0334877	0.0950364	0.00340361	0.22931	0.0298805	0.103707	0.256148	0.0395833	0.543442
Cmss1	Cmss1	ENSMUSG00000022748	66497	16	cms small ribosomal subunit 1 [Source:MGI Symbol;Acc:MGI:1913747]	8838	39.4652	4.35332	-0.505058	-2.96931	1.88906	1.08025	7.20073e-08	0.475526	8.35245e-05	0.0103162	0.284083	1.03617e-06	0.648503	0.00154238	0.0810762	0.600947
Setd6	Setd6	ENSMUSG00000031671	66083	8	SET domain containing 6 [Source:MGI Symbol;Acc:MGI:1913333]	7818	32.0931	4.35176	-1.71662	-3.17722	2.89116	0.286061	2.11883e-11	0.00316484	2.14261e-07	2.25014e-06	0.723984	6.71393e-10	0.0174006	1.01398e-05	0.000142188	0.88898
AI846148	AI846148	ENSMUSG00000024970	68229	19	expressed sequence AI846148 [Source:MGI Symbol;Acc:MGI:2147611]	9556	11.8522	4.34585	-2.71019	-3.65254	3.40349	0.249054	5.40495e-05	0.0066786	0.000434953	0.000995358	0.854446	0.000348596	0.0308974	0.00569179	0.0163382	0.947349
Mrpl2	Mrpl2	ENSMUSG00000002767	27398	17	mitochondrial ribosomal protein L2 [Source:MGI Symbol;Acc:MGI:1351622]	9029	43.7763	4.34558	-0.430779	-3.20081	1.57555	1.62526	2.41295e-06	0.594076	0.000237195	0.0582597	0.158737	2.39369e-05	0.744718	0.00352791	0.24309	0.452285
Slc37a4	Slc37a4	ENSMUSG00000032114	14385	9	solute carrier family 37 (glucose-6-phosphate transporter), member 4 [Source:MGI Symbol;Acc:MGI:1316650]	6097	32.3293	4.34555	0.149138	-3.43293	0.763481	2.66945	1.69285e-08	0.824832	3.23485e-06	0.26108	0.00586001	2.82107e-07	0.901098	0.000103402	0.554019	0.0623774
Ncs1	Ncs1	ENSMUSG00000062661	14299	2	neuronal calcium sensor 1 [Source:MGI Symbol;Acc:MGI:109166]	10476	5.97927	4.34159	-3.9002	-4.71783	3.52396	1.19388	0.00661833	0.0134545	0.00384007	0.0226791	0.55825	0.0200618	0.0527361	0.0293975	0.136	0.807638
9130019P16Rik	9130019P16Rik	ENSMUSG00000073067		6	RIKEN cDNA 9130019P16 gene [Source:MGI Symbol;Acc:MGI:1918824]	9174	9.7016	4.33946	-0.638346	-3.33654	1.64127	1.69526	3.13815e-06	0.4358	0.000163988	0.0514158	0.146265	3.01196e-05	0.614097	0.00266377	0.224114	0.435094
Mrpl36	Mrpl36	ENSMUSG00000021607	94066	13	mitochondrial ribosomal protein L36 [Source:MGI Symbol;Acc:MGI:2137228]	9637	42.5471	4.33931	-0.377614	-3.16832	1.5486	1.61973	2.58425e-05	0.676777	0.00112001	0.0973947	0.211187	0.000187092	0.806159	0.0120275	0.325105	0.520915
4430402I18Rik	4430402I18Rik	ENSMUSG00000064202	381218	19	RIKEN cDNA 4430402I18 gene [Source:MGI Symbol;Acc:MGI:1918036]	9197	19.939	4.33581	-1.57011	-3.68504	2.22088	1.46415	1.87305e-05	0.0836297	0.000170662	0.016992	0.248015	0.000143649	0.201538	0.00273165	0.112512	0.562368
Snora28	Snora28	ENSMUSG00000064493		12	small nucleolar RNA, H/ACA box 28 [Source:MGI Symbol;Acc:MGI:3819496]	10348	222.258	4.32955	1.98043	-2.02004	0.329083	1.69096	0.00190058	0.119882	0.105824	0.795438	0.340563	0.00705507	0.258558	0.273855	0.9138	0.653991
Srl	Srl	ENSMUSG00000022519	106393	16	sarcalumenin [Source:MGI Symbol;Acc:MGI:2146620]	10654	4.48112	4.32706	0.241497	-1.83448	2.25108	-0.416596	0.00545679	0.857942	0.181379	0.12348	0.819028	0.0171418	0.92295	0.384056	0.372565	0.932164
Haus8	Haus8	ENSMUSG00000035439	76478	8	4HAUS augmin-like complex, subunit 8 [Source:MGI Symbol;Acc:MGI:1923728]	7443	33.2662	4.32672	2.26427	-2.76522	-0.702762	3.46798	1.17461e-06	0.00570942	0.000836607	0.37502	0.00227505	1.27642e-05	0.0274716	0.00953863	0.655782	0.0326389
Hcn1	Hcn1	ENSMUSG00000021730	15165	13	hyperpolarization-activated, cyclic nucleotide-gated K+ 1 [Source:MGI Symbol;Acc:MGI:1096392]	9618	4.87116	4.32115	2.55	-2.44858	-0.677426	3.12601	1.81482e-05	0.00718921	0.00788839	0.463293	0.0159392	0.000139899	0.032638	0.0482844	0.725371	0.119863
Gm14023	Gm14023	ENSMUSG00000085498		2	predicted gene 14023 [Source:MGI Symbol;Acc:MGI:3650639]	7026	33.0177	4.31911	2.96433	-2.26778	-0.912997	3.18077	6.12364e-08	8.64898e-05	0.00181377	0.201523	0.00173697	8.94969e-07	0.000994224	0.017108	0.485682	0.0269272
Thg1l	Thg1l	ENSMUSG00000011254	66628	11	tRNA-histidine guanylyltransferase 1-like (S. cerevisiae) [Source:MGI Symbol;Acc:MGI:1913878]	10103	7.97572	4.31476	3.63424	-3.08422	-2.40371	5.48793	0.00160814	0.00882018	0.0165725	0.0748623	0.00319347	0.00613192	0.0381719	0.080952	0.278366	0.0418956
Tigd5	Tigd5	ENSMUSG00000103906	105734	15	tigger transposable element derived 5 [Source:MGI Symbol;Acc:MGI:2145902]	10469	4.96501	4.31288	0.561638	-2.38204	1.3692	1.01284	0.00704094	0.689638	0.101972	0.34648	0.619269	0.0210362	0.81472	0.266944	0.633927	0.840766
Pgam1	Pgam1	ENSMUSG00000011752	18648	19	phosphoglycerate mutase 1 [Source:MGI Symbol;Acc:MGI:97552]	7455	31.3005	4.3105	-1.4286	-3.21849	2.52061	0.697875	1.0464e-13	0.00568998	4.51316e-09	2.95032e-06	0.334373	4.84714e-12	0.0274022	3.76625e-07	0.000173403	0.647995
Tcf3	Tcf3	ENSMUSG00000020167	21423	10	transcription factor 3 [Source:MGI Symbol;Acc:MGI:98510]	8579	14.2471	4.30412	-2.54325	-3.60475	3.24263	0.362121	8.24229e-07	0.00162398	1.89198e-05	0.000100723	0.73988	9.29873e-06	0.0104003	0.000441947	0.00295202	0.897816
H2-T23	H2-T23	ENSMUSG00000067212	15040	17	histocompatibility 2, T region locus 23 [Source:MGI Symbol;Acc:MGI:95957]	10075	20.5427	4.30349	-1.98479	-2.338	3.95028	-1.61228	0.00686564	0.166144	0.107025	0.011723	0.414736	0.0206082	0.324452	0.275617	0.0886279	0.712204
Pcbd2	Pcbd2	ENSMUSG00000021496	72562	13	pterin 4 alpha carbinolamine dehydratase/dimerization cofactor of hepatocyte nuclear factor 1 alpha (TCF1) 2 [Source:MGI Symbol;Acc:MGI:1919812]	8721	86.7121	4.30158	1.70523	-2.479	0.117346	2.36166	1.9202e-07	0.0226125	0.00107451	0.873871	0.0237918	2.50202e-06	0.07766	0.0115958	0.947992	0.154777
Zfp456	Zfp456	ENSMUSG00000078995	408065	13	zinc finger protein 456 [Source:MGI Symbol;Acc:MGI:3040694]	8850	11.5653	4.29682	-0.189406	-3.09669	1.38954	1.70715	8.44387e-06	0.822914	0.000668894	0.109019	0.157788	7.14461e-05	0.899789	0.00799164	0.346955	0.45143
Rimklb	Rimklb	ENSMUSG00000040649	108653	6	ribosomal modification protein rimK-like family member B [Source:MGI Symbol;Acc:MGI:1918325]	6004	16.7621	4.29628	1.63341	-2.60501	0.0578687	2.54714	3.8089e-09	0.0127108	0.00011273	0.928274	0.0055417	7.30508e-08	0.0505473	0.00197812	0.972113	0.0601799
Mrgpre	Mrgpre	ENSMUSG00000048965	244238	7	MAS-related GPR, member E [Source:MGI Symbol;Acc:MGI:2441884]	8547	12.0306	4.29603	-3.06219	-3.31376	4.04446	-0.7307	9.51819e-08	5.3189e-05	1.50447e-05	3.80088e-07	0.465666	1.32551e-06	0.000676906	0.000368763	3.05524e-05	0.74971
Sdc3	Sdc3	ENSMUSG00000025743	20970	4	syndecan 3 [Source:MGI Symbol;Acc:MGI:1349163]	10343	4.84758	4.29144	-2.37218	-2.71274	3.95087	-1.23813	0.00431735	0.0833048	0.0503935	0.00770444	0.506741	0.0140492	0.201119	0.172049	0.0674339	0.77641
Aen	Aen	ENSMUSG00000030609	68048	7	apoptosis enhancing nuclease [Source:MGI Symbol;Acc:MGI:1915298]	9368	15.4252	4.28798	-0.0844953	-2.83353	1.53894	1.29459	0.000243788	0.93423	0.00935583	0.144324	0.375813	0.00126188	0.965951	0.0540387	0.406846	0.681437
Lefty1	Lefty1	ENSMUSG00000038793	13590	1	left right determination factor 1 [Source:MGI Symbol;Acc:MGI:107405]	9040	27.4567	4.28383	1.43291	-3.11981	-0.268895	3.38871	1.21466e-05	0.10509	0.000747219	0.758976	0.00695784	9.84331e-05	0.236631	0.00873646	0.900492	0.0703636
Egf	Egf	ENSMUSG00000028017	13645	3	epidermal growth factor [Source:MGI Symbol;Acc:MGI:95290]	10812	3.85301	4.27978	0.974122	-2.29899	1.00666	1.29233	0.00169046	0.431343	0.0564197	0.45346	0.48947	0.00639007	0.610255	0.184169	0.71899	0.764027
Fbxl18	Fbxl18	ENSMUSG00000066640	231863	5	F-box and leucine-rich repeat protein 18 [Source:MGI Symbol;Acc:MGI:2444450]	8071	17.9522	4.27971	0.480084	-3.44717	0.352451	3.09472	1.94414e-05	0.586668	0.000342019	0.690512	0.015049	0.000148107	0.738112	0.00473285	0.867763	0.116102
Mreg	Mreg	ENSMUSG00000039395	381269	1	melanoregulin [Source:MGI Symbol;Acc:MGI:2151839]	10087	12.2433	4.27314	5.49791	-2.34024	-3.56502	5.90526	0.00119459	0.000233428	0.0518982	0.0127028	0.0015915	0.00477707	0.00223257	0.174623	0.0937589	0.0253249
Acvr2b	Acvr2b	ENSMUSG00000061393	11481	9	activin receptor IIB [Source:MGI Symbol;Acc:MGI:87912]	7301	34.8627	4.26749	1.18276	-2.85865	0.226084	2.63257	5.94749e-14	0.0202054	7.21903e-08	0.656921	0.000264519	2.88012e-12	0.0712324	4.17558e-06	0.852928	0.00691799
Nutf2	Nutf2	ENSMUSG00000008450	68051;621832	8	nuclear transport factor 2 [Source:MGI Symbol;Acc:MGI:1915301]	10332	14.055	4.26607	-1.08068	-3.60931	1.73744	1.87187	0.0016431	0.372634	0.00580039	0.162029	0.278461	0.00624778	0.556051	0.0391665	0.432869	0.594442
Thoc6	Thoc6	ENSMUSG00000041319	386612	17	THO complex 6 [Source:MGI Symbol;Acc:MGI:2677480]	9227	29.5773	4.25901	-0.518736	-3.27752	1.50023	1.77729	2.58595e-05	0.561121	0.000677868	0.100997	0.162635	0.000187092	0.721008	0.00808018	0.332583	0.458702
Trip13	Trip13	ENSMUSG00000021569	69716	13	thyroid hormone receptor interactor 13 [Source:MGI Symbol;Acc:MGI:1916966]	10637	9.60954	4.25868	3.65455	-1.78814	-1.18401	2.97215	0.00166464	0.00848453	0.133974	0.395841	0.106414	0.00631436	0.0370123	0.31729	0.673508	0.366285
1110015O18Rik	1110015O18Rik	ENSMUSG00000098659		3	RIKEN cDNA 1110015O18 gene [Source:MGI Symbol;Acc:MGI:1915766]	10913	9.21468	4.25687	0.000856849	-1.81628	2.43974	-0.623461	0.00582842	0.999509	0.160549	0.115838	0.718161	0.0181012	0.999691	0.356516	0.359213	0.887412
Cox18	Cox18	ENSMUSG00000035505	231430	5	cytochrome c oxidase assembly protein 18 [Source:MGI Symbol;Acc:MGI:2448532]	8607	36.8183	4.25011	-0.938832	-3.37104	1.81791	1.55313	1.63117e-07	0.192027	1.42656e-05	0.0139667	0.127359	2.16407e-06	0.357804	0.000352832	0.0990807	0.401096
Map3k10	Map3k10	ENSMUSG00000040390	269881	7	mitogen-activated protein kinase kinase kinase 10 [Source:MGI Symbol;Acc:MGI:1346879]	8194	13.2141	4.24959	0.543438	-3.51316	0.192993	3.32017	0.000286699	0.599062	0.00189519	0.851867	0.0262603	0.00144566	0.748561	0.0176741	0.939718	0.164045
S1pr2	S1pr2	ENSMUSG00000043895	14739	9	sphingosine-1-phosphate receptor 2 [Source:MGI Symbol;Acc:MGI:99569]	10230	7.70276	4.24817	-4.53961	-2.6456	6.14218	-3.49658	0.00471807	0.0022273	0.0541095	0.00015389	0.0698255	0.0151566	0.0132331	0.179295	0.00419533	0.29343
Ccnd3	Ccnd3	ENSMUSG00000034165	12445	17	cyclin D3 [Source:MGI Symbol;Acc:MGI:88315]	9652	17.0314	4.24763	-3.36864	-3.33361	4.28266	-0.949059	8.55292e-05	0.00109827	0.00121594	7.66978e-05	0.482532	0.000510932	0.00766274	0.0127174	0.00240246	0.759763
Ercc2	Ercc2	ENSMUSG00000030400	13871	7	excision repair cross-complementing rodent repair deficiency, complementation group 2 [Source:MGI Symbol;Acc:MGI:95413]	9122	11.8513	4.238	-2.73204	-3.61609	3.35394	0.262154	2.10132e-05	0.00332592	0.000179304	0.00046888	0.834312	0.000157556	0.0180801	0.00283259	0.00958092	0.937682
Alg8	Alg8	ENSMUSG00000035704	381903	7	asparagine-linked glycosylation 8 (alpha-1,3-glucosyltransferase) [Source:MGI Symbol;Acc:MGI:2141959]	7473	28.9467	4.23491	1.27328	-3.0228	-0.0611723	3.08397	3.00991e-09	0.0470375	7.24562e-06	0.923405	0.000712369	5.95015e-08	0.134899	0.00020155	0.97036	0.0141149
Slc26a2	Slc26a2	ENSMUSG00000034320	13521	18	solute carrier family 26 (sulfate transporter), member 2 [Source:MGI Symbol;Acc:MGI:892977]	6661	16.6661	4.22765	0.538442	-3.03485	0.654352	2.3805	2.15235e-14	0.271593	6.20933e-09	0.185505	0.000670636	1.17062e-12	0.454679	4.93968e-07	0.465979	0.0135767
Srxn1	Srxn1	ENSMUSG00000032802	76650	2	sulfiredoxin 1 homolog (S. cerevisiae) [Source:MGI Symbol;Acc:MGI:104971]	8297	18.0897	4.22368	-1.5235	-3.3013	2.44589	0.855412	8.51036e-09	0.0206707	2.44288e-06	0.000338794	0.351762	1.52517e-07	0.0725432	8.16683e-05	0.00755856	0.662588
Col6a2	Col6a2	ENSMUSG00000020241	12834	10	collagen, type VI, alpha 2 [Source:MGI Symbol;Acc:MGI:88460]	7085	16.3205	4.22307	-0.212329	-3.02966	1.40575	1.62391	2.7347e-15	0.652195	1.83074e-09	0.00366741	0.015666	1.75857e-13	0.789743	1.74032e-07	0.0417626	0.119262
Gsto2	Gsto2	ENSMUSG00000025069	68214	19	glutathione S-transferase omega 2 [Source:MGI Symbol;Acc:MGI:1915464]	9402	32.8826	4.22023	0.597855	-3.00103	0.621347	2.37968	3.25967e-05	0.507285	0.00171577	0.495047	0.064898	0.000226109	0.676132	0.0164678	0.7505	0.281981
Cited2	Cited2	ENSMUSG00000039910	17684	10	Cbp/p300-interacting transactivator, with Glu/Asp-rich carboxy-terminal domain, 2 [Source:MGI Symbol;Acc:MGI:1306784]	8573	24.4907	4.21589	-0.563422	-3.61848	1.16083	2.45765	2.13423e-05	0.520612	0.000172295	0.19124	0.0501619	0.000159585	0.688163	0.00274568	0.473531	0.245124
Dpagt1	Dpagt1	ENSMUSG00000032123	13478	9	dolichyl-phosphate (UDP-N-acetylglucosamine) acetylglucosaminephosphotransferase 1 (GlcNAc-1-P transferase) [Source:MGI Symbol;Acc:MGI:1196396]	4191	44.5379	4.21552	0.432976	-3.17419	0.608347	2.56585	3.81584e-12	0.417989	4.00475e-08	0.257046	0.000814643	1.35437e-10	0.597012	2.50171e-06	0.549585	0.0154345
Mfsd5	Mfsd5	ENSMUSG00000045665	106073	15	major facilitator superfamily domain containing 5 [Source:MGI Symbol;Acc:MGI:2145901]	5229	43.1857	4.21471	-0.28578	-3.40591	1.09457	2.31134	1.23792e-10	0.62001	6.50211e-08	0.0608232	0.00508585	3.36192e-09	0.764623	3.8631e-06	0.248973	0.0565869
Enthd2	Enthd2					9304	15.0159	4.21056	-0.507284	-3.09512	1.62272	1.4724	2.36557e-05	0.564033	0.00102901	0.0730614	0.239956	0.000174145	0.722522	0.0111932	0.274187	0.554878
Pelo	Pelo	ENSMUSG00000042275	105083	13	pelota homolog (Drosophila) [Source:MGI Symbol;Acc:MGI:2145154]	10017	20.5645	4.20576	2.9682	-1.65954	-0.421981	2.08152	0.00170042	0.0201926	0.16616	0.729118	0.222598	0.00641884	0.0712312	0.363583	0.886718	0.535763
Pcdhb16	Pcdhb16	ENSMUSG00000047910	93887	18	protocadherin beta 16 [Source:MGI Symbol;Acc:MGI:2136752]	8993	7.7019	4.20369	2.0663	-2.66632	-0.528924	3.19524	0.00253912	0.105627	0.0399066	0.669319	0.0724126	0.009021	0.23745	0.146523	0.857293	0.299593
Ap5s1	Ap5s1	ENSMUSG00000068264	69596	2	adaptor-related protein 5 complex, sigma 1 subunit [Source:MGI Symbol;Acc:MGI:1916846]	10351	17.1014	4.20284	1.58778	-2.06794	0.547111	1.52083	0.0017361	0.1919	0.0878636	0.655423	0.374862	0.00652617	0.357689	0.243726	0.852498	0.680382
Mob3c	Mob3c	ENSMUSG00000028709	100465	4	MOB kinase activator 3C [Source:MGI Symbol;Acc:MGI:2140623]	9931	12.1376	4.19926	1.00828	-2.81286	0.378114	2.43475	0.00013964	0.3086	0.00628747	0.704775	0.0839494	0.000787732	0.493441	0.0412639	0.874268	0.324517
Slc26a1	Slc26a1	ENSMUSG00000046959	231583	5	solute carrier family 26 (sulfate transporter), member 1 [Source:MGI Symbol;Acc:MGI:2385894]	9449	12.7209	4.19894	-0.29713	-2.44362	2.05245	0.391171	0.00433473	0.818197	0.0720836	0.12783	0.832488	0.0140806	0.896641	0.215423	0.380534	0.937013
Dak	Dak					6679	27.3119	4.19746	0.697991	-3.26904	0.230428	3.03862	3.5201e-06	0.383537	0.000160644	0.773205	0.00831147	3.31739e-05	0.565757	0.00262505	0.905534	0.0790783
Tmco6	Tmco6	ENSMUSG00000006850	71983	18	transmembrane and coiled-coil domains 6 [Source:MGI Symbol;Acc:MGI:1919233]	9598	20.7933	4.19545	-2.31328	-3.17153	3.33721	-0.16568	4.67494e-05	0.0145616	0.00118457	0.000787163	0.895663	0.000306761	0.055914	0.0124757	0.0139696	0.960807
Dap	Dap	ENSMUSG00000039168	223453	15	death-associated protein [Source:MGI Symbol;Acc:MGI:1918190]	10297	19.6607	4.19433	-0.630047	-2.94143	1.88295	1.05847	0.000449752	0.55202	0.00858863	0.0889683	0.487667	0.00212476	0.712983	0.050969	0.309155	0.763182
Syt16	Syt16	ENSMUSG00000044912	238266	12	synaptotagmin XVI [Source:MGI Symbol;Acc:MGI:2673872]	10692	7.89254	4.19433	-1.15746	-3.30675	2.04504	1.26171	0.00194083	0.344581	0.00984554	0.111317	0.481665	0.00717282	0.529486	0.0558834	0.350898	0.759602
Dhps	Dhps	ENSMUSG00000060038	330817	8	deoxyhypusine synthase [Source:MGI Symbol;Acc:MGI:2683592]	7650	43.0297	4.18509	0.536036	-2.86971	0.779346	2.09036	1.35963e-12	0.306353	2.20534e-07	0.142314	0.00516254	5.21433e-11	0.491086	1.02913e-05	0.403157	0.057007
Pla2g7	Pla2g7	ENSMUSG00000023913	27226	17	phospholipase A2, group VII (platelet-activating factor acetylhydrolase, plasma) [Source:MGI Symbol;Acc:MGI:1351327]	7732	28.6368	4.18416	3.43794	-1.96732	-1.2211	3.18842	9.1734e-08	6.86386e-06	0.00560652	0.0885041	0.00155558	1.2824e-06	0.000124644	0.0381397	0.308766	0.0249205
Gm5595	Gm5595					7843	17.5871	4.17125	0.243593	-2.64638	1.28127	1.36511	7.04979e-11	0.666189	8.64168e-06	0.0268692	0.0897588	2.02811e-09	0.799936	0.000232687	0.15182	0.335468
Itih5	Itih5	ENSMUSG00000025780	209378	2	inter-alpha (globulin) inhibitor H5 [Source:MGI Symbol;Acc:MGI:1925751]	7210	7.62889	4.16885	0.671267	-2.587	0.910574	1.67643	1.24306e-13	0.178609	7.11562e-07	0.0721082	0.0180662	5.61536e-12	0.339929	2.80823e-05	0.272495	0.129423
Mutyh	Mutyh	ENSMUSG00000028687	70603	4	mutY DNA glycosylase [Source:MGI Symbol;Acc:MGI:1917853]	9001	28.071	4.16733	-0.181056	-2.87447	1.47391	1.40056	1.29718e-05	0.82992	0.0013735	0.0887372	0.243966	0.00010427	0.904284	0.0139416	0.309039	0.559665
Gmppa	Gmppa	ENSMUSG00000033021	69080	1	GDP-mannose pyrophosphorylase A [Source:MGI Symbol;Acc:MGI:1916330]	5935	43.3629	4.16431	-0.239763	-3.56734	0.836728	2.73062	3.93662e-05	0.78817	0.000291336	0.351873	0.033415	0.000265485	0.8776	0.00417964	0.637333	0.192462
Mipep	Mipep	ENSMUSG00000021993	70478	14	mitochondrial intermediate peptidase [Source:MGI Symbol;Acc:MGI:1917728]	7072	25.0239	4.16155	-0.456901	-3.08117	1.53729	1.54388	1.94998e-09	0.455654	2.87392e-06	0.0143187	0.0763131	3.98451e-08	0.633018	9.37842e-05	0.100558	0.308298
Amotl1	Amotl1	ENSMUSG00000013076	75723	9	angiomotin-like 1 [Source:MGI Symbol;Acc:MGI:1922973]	10109	3.46855	4.16036	4.49038	-1.36253	-1.69255	3.05507	0.00191854	0.00124685	0.25241	0.189353	0.0816987	0.00710244	0.00850319	0.466174	0.471617	0.319218
Gm16740	Gm16740	ENSMUSG00000097167		3	predicted gene, 16740 [Source:MGI Symbol;Acc:MGI:4439664]	9846	32.0847	4.15327	-0.956784	-1.55572	3.55433	-1.9986	0.0121622	0.513393	0.294398	0.0275286	0.336081	0.0330987	0.681531	0.511907	0.153935	0.649124
Rmdn2	Rmdn2	ENSMUSG00000036368	381110	17	regulator of microtubule dynamics 2 [Source:MGI Symbol;Acc:MGI:2147043]	6503	36.7598	4.15287	1.34254	-2.75068	0.0596507	2.69103	2.96043e-15	0.00471864	2.30711e-08	0.899402	6.07935e-05	1.87072e-13	0.0238264	1.55687e-06	0.958849	0.00218356
Angpt4	Angpt4	ENSMUSG00000027460	11602	2	angiopoietin 4 [Source:MGI Symbol;Acc:MGI:1336887]	10323	18.4033	4.15034	3.4447	-1.8327	-1.12705	2.95975	0.00122449	0.00696767	0.111722	0.360333	0.0793015	0.00486944	0.0318972	0.283243	0.643233	0.314445
Sntb2	Sntb2	ENSMUSG00000041308	20650	8	syntrophin, basic 2 [Source:MGI Symbol;Acc:MGI:101771]	10729	4.60756	4.14902	3.5601	-2.31258	-1.72366	4.03624	0.00146494	0.0118169	0.0488335	0.237501	0.0313724	0.00564693	0.047616	0.167737	0.53117	0.184786
Zfp607	Zfp607					9398	11.8027	4.14579	0.418522	-2.69627	1.031	1.66527	1.13649e-05	0.617223	0.00220124	0.227415	0.163454	9.26481e-05	0.762944	0.0197732	0.518046	0.459974
Ltbp4	Ltbp4	ENSMUSG00000040488	108075	7	latent transforming growth factor beta binding protein 4 [Source:MGI Symbol;Acc:MGI:1321395]	10747	3.65264	4.14227	2.3565	-2.47313	-0.687355	3.16048	0.0062303	0.111152	0.0735765	0.647353	0.12303	0.0190944	0.245328	0.218155	0.848113	0.394866
Nipsnap1	Nipsnap1	ENSMUSG00000034285	18082	11	nipsnap homolog 1 (C. elegans) [Source:MGI Symbol;Acc:MGI:1278344]	7775	28.4648	4.14103	1.57939	-2.86346	-0.301827	3.16529	1.76715e-05	0.0707698	0.00163345	0.725245	0.0103652	0.000137205	0.179613	0.0159436	0.885259	0.090211
Pcnxl3	Pcnxl3					7005	8.0316	4.14076	-0.798167	-3.09894	1.83998	1.25897	4.80099e-05	0.376554	0.00140175	0.0472199	0.323602	0.000314278	0.55961	0.0140974	0.21265	0.637791
Unc119b	Unc119b	ENSMUSG00000046562	106840	5	unc-119 lipid binding chaperone B [Source:MGI Symbol;Acc:MGI:2147162]	8496	13.3895	4.13458	1.16472	-3.06479	-0.0949335	3.15972	9.76284e-06	0.166043	0.000561418	0.909514	0.00842193	8.11416e-05	0.324372	0.00696219	0.963357	0.0793793
Sbk3	Sbk3	ENSMUSG00000085272	381835	7	SH3 domain binding kinase family, member 3 [Source:MGI Symbol;Acc:MGI:2685924]	9911	10.2399	4.13304	-0.117615	-3.24799	1.00267	2.24532	0.00625571	0.929938	0.024924	0.459835	0.242103	0.0191561	0.963336	0.107356	0.723685	0.55802
Abcb1b	Abcb1b	ENSMUSG00000028970	18669	5	ATP-binding cassette, sub-family B (MDR/TAP), member 1B [Source:MGI Symbol;Acc:MGI:97568]	10832	3.9593	4.13207	1.30097	-1.76538	1.06572	0.699667	0.00483704	0.327278	0.167507	0.458009	0.735103	0.0154642	0.512066	0.365288	0.723065	0.894676
Fam155a	Fam155a	ENSMUSG00000079157	270028	8	family with sequence similarity 155, member A [Source:MGI Symbol;Acc:MGI:2142765]	9321	12.4895	4.13079	-2.84925	-3.93634	3.0437	0.892643	0.0139959	0.0726438	0.0180758	0.0573125	0.671877	0.0371764	0.183066	0.0858463	0.241197	0.86656
Zfp810	Zfp810	ENSMUSG00000066829	235050	9	zinc finger protein 810 [Source:MGI Symbol;Acc:MGI:2384563]	7136	18.6002	4.13066	0.837694	-3.03857	0.254399	2.78417	1.03515e-09	0.165648	2.24321e-06	0.673707	0.00125965	2.26326e-08	0.323715	7.70686e-05	0.860193	0.0211204
Cplx2	Cplx2	ENSMUSG00000025867	12890	13	complexin 2 [Source:MGI Symbol;Acc:MGI:104726]	10659	4.31935	4.12608	2.54529	-1.18973	0.39106	0.798675	0.00632191	0.0727185	0.367075	0.784251	0.687949	0.0193156	0.18317	0.583434	0.909377	0.873996
Spred3	Spred3	ENSMUSG00000037239	101809	7	sprouty-related, EVH1 domain containing 3 [Source:MGI Symbol;Acc:MGI:2142186]	10475	5.98366	4.12508	3.52663	-3.08968	-2.49123	5.58092	0.00325864	0.0169743	0.0200595	0.0884274	0.00463218	0.0110907	0.0627114	0.0921386	0.308649	0.0531119
Spata1	Spata1	ENSMUSG00000028188	70951	3	spermatogenesis associated 1 [Source:MGI Symbol;Acc:MGI:1918201]	9192	22.6731	4.12147	1.90415	-2.23222	-0.0148918	2.24711	8.47838e-06	0.0251402	0.00851973	0.985781	0.0567638	7.16826e-05	0.0840211	0.0507562	0.994747	0.262664
Tctn1	Tctn1	ENSMUSG00000038593	654470	5	tectonic family member 1 [Source:MGI Symbol;Acc:MGI:3603820]	8369	12.6333	4.11543	1.03766	-2.54035	0.537412	2.00294	3.7532e-07	0.152375	0.000737144	0.459322	0.0509079	4.51375e-06	0.305645	0.00865628	0.723532	0.247455
Ppp4c	Ppp4c	ENSMUSG00000030697	56420	7	protein phosphatase 4, catalytic subunit [Source:MGI Symbol;Acc:MGI:1891763]	10368	20.8825	4.11172	2.16128	-2.36437	-0.413928	2.77829	0.000673311	0.0587229	0.0328292	0.716647	0.0792079	0.00298001	0.158008	0.128037	0.880381	0.314346
Tmtc4	Tmtc4	ENSMUSG00000041594	70551	14	transmembrane and tetratricopeptide repeat containing 4 [Source:MGI Symbol;Acc:MGI:1921050]	9450	12.073	4.11002	-0.773648	-3.15268	1.73099	1.42169	2.69094e-05	0.374842	0.000732588	0.0536519	0.250871	0.000192986	0.558051	0.00863002	0.230079	0.565369
Myrip	Myrip	ENSMUSG00000041794	245049	9	myosin VIIA and Rab interacting protein [Source:MGI Symbol;Acc:MGI:2384407]	9741	7.99378	4.10743	0.239108	-2.64995	1.21837	1.43158	0.00033375	0.81358	0.0130871	0.240435	0.323029	0.00164572	0.893606	0.0680951	0.533313	0.637199
Snx7	Snx7	ENSMUSG00000028007	76561	3	sorting nexin 7 [Source:MGI Symbol;Acc:MGI:1923811]	6668	29.6797	4.10279	1.37935	-2.79585	-0.0724072	2.86825	2.91367e-13	0.00676653	1.21948e-07	0.885935	6.78729e-05	1.22039e-11	0.0311892	6.25884e-06	0.95384	0.00237057
Dusp14	Dusp14	ENSMUSG00000018648	56405	11	dual specificity phosphatase 14 [Source:MGI Symbol;Acc:MGI:1927168]	9109	30.7682	4.09897	-1.24078	-2.97973	2.36002	0.619716	2.86202e-06	0.113746	0.000324227	0.00388794	0.574685	2.78112e-05	0.249343	0.00454417	0.0438175	0.815162
Dyx1c1	Dyx1c1	ENSMUSG00000092192	67685	9	dyslexia susceptibility 1 candidate 1 [Source:MGI Symbol;Acc:MGI:1914935]	8737	24.272	4.09565	-1.80671	-3.07476	2.8276	0.247166	0.000752921	0.101974	0.00793584	0.0139411	0.871716	0.00327665	0.231563	0.0484663	0.098964	0.952865
Pcdhb7	Pcdhb7	ENSMUSG00000045062	93878	18	protocadherin beta 7 [Source:MGI Symbol;Acc:MGI:2136741]	9496	11.5194	4.09203	1.70497	-2.52225	-0.135182	2.65743	2.62905e-05	0.0563368	0.00525235	0.878397	0.0335505	0.000189458	0.153546	0.0365724	0.949534	0.193039
Iah1	Iah1	ENSMUSG00000062054	67732	12	isoamyl acetate-hydrolyzing esterase 1 homolog [Source:MGI Symbol;Acc:MGI:1914982]	8069	56.3121	4.09056	1.06627	-3.23817	-0.213881	3.45205	1.01127e-05	0.200505	0.000272903	0.7961	0.00386256	8.36879e-05	0.368948	0.00394626	0.913802	0.047285
Scarb1	Scarb1	ENSMUSG00000037936	20778	5	scavenger receptor class B, member 1 [Source:MGI Symbol;Acc:MGI:893578]	8048	21.5555	4.08077	-0.432031	-3.03177	1.48104	1.55073	6.35342e-09	0.488607	5.63518e-06	0.0205753	0.0807572	1.16536e-07	0.660709	0.000165602	0.127949	0.316937
Snx22	Snx22	ENSMUSG00000039452	382083	9	sorting nexin 22 [Source:MGI Symbol;Acc:MGI:2685966]	8133	19.6781	4.08049	-2.08674	-3.45885	2.70838	0.750474	6.53779e-05	0.026277	0.000487737	0.0049221	0.558616	0.000409811	0.0868641	0.00621018	0.0512461	0.807776
2700046A07Rik	2700046A07Rik	ENSMUSG00000041789		18	RIKEN cDNA 2700046A07 gene [Source:MGI Symbol;Acc:MGI:1919803]	5314	35.2199	4.07992	-0.313444	-3.05221	1.34115	1.71105	8.82702e-15	0.501184	1.12079e-09	0.00477992	0.00993518	5.16026e-13	0.670535	1.11386e-07	0.0503024	0.0878936
BC024139	BC024139	ENSMUSG00000044361	271278	15	cDNA sequence BC024139 [Source:MGI Symbol;Acc:MGI:2442591]	10257	10.2321	4.07937	-0.828336	-2.24999	2.65772	-0.407736	0.0070378	0.536804	0.105337	0.0629726	0.826371	0.0210326	0.700865	0.273008	0.253654	0.935947
2410127L17Rik	2410127L17Rik					9380	19.7259	4.07908	1.9607	-2.18253	-0.0641501	2.24669	3.30942e-05	0.0305507	0.0154076	0.942512	0.073484	0.000229124	0.0970026	0.0764228	0.978379	0.301766
2310022A10Rik	2310022A10Rik	ENSMUSG00000049643	66367	7	RIKEN cDNA 2310022A10 gene [Source:MGI Symbol;Acc:MGI:1913617]	7648	21.6475	4.07752	-0.705057	-3.28805	1.49452	1.79353	1.20655e-08	0.268469	1.79604e-06	0.0214904	0.0474905	2.09033e-07	0.451246	6.30487e-05	0.131468	0.236846
Cnr1	Cnr1	ENSMUSG00000044288	12801	4	cannabinoid receptor 1 (brain) [Source:MGI Symbol;Acc:MGI:104615]	10655	2.91807	4.07274	-3.02104	-2.49528	4.59851	-2.10323	0.0147458	0.0523272	0.102489	0.00695741	0.320583	0.038676	0.145631	0.267848	0.0641302	0.63389
Zfp593	Zfp593	ENSMUSG00000028840	68040	4	zinc finger protein 593 [Source:MGI Symbol;Acc:MGI:1915290]	9657	19.1937	4.07065	-1.45389	-3.04513	2.47941	0.565718	7.36764e-05	0.116391	0.00180012	0.0101392	0.663785	0.000451728	0.253262	0.0170233	0.0804338	0.863047
Nup37	Nup37	ENSMUSG00000035351	69736	10	nucleoporin 37 [Source:MGI Symbol;Acc:MGI:1919964]	8249	40.4439	4.07059	1.19552	-3.12167	-0.246608	3.36828	6.78257e-06	0.143267	0.000305448	0.760891	0.00389304	5.87536e-05	0.292966	0.00431973	0.901785	0.0473928
Ddx41	Ddx41	ENSMUSG00000021494	72935	13	DEAD (Asp-Glu-Ala-Asp) box polypeptide 41 [Source:MGI Symbol;Acc:MGI:1920185]	7532	25.6034	4.0663	0.0718963	-3.16786	0.82655	2.34131	3.45942e-06	0.926223	0.000161303	0.291717	0.0353483	3.27432e-05	0.961138	0.00263189	0.584565	0.200373
Pla2g15	Pla2g15	ENSMUSG00000031903	192654	8	phospholipase A2, group XV [Source:MGI Symbol;Acc:MGI:2178076]	10871	6.11632	4.064	-2.30432	-3.65381	2.71452	0.939289	0.00393892	0.0853633	0.00736085	0.0502479	0.642579	0.0130406	0.204248	0.046057	0.221854	0.85127
Slc16a3	Slc16a3	ENSMUSG00000025161	80879	11	solute carrier family 16 (monocarboxylic acid transporters), member 3 [Source:MGI Symbol;Acc:MGI:1933438]	10349	10.927	4.0623	-1.42751	-3.25635	2.23346	1.02289	0.00297888	0.248599	0.0130174	0.0807961	0.559141	0.0102632	0.42869	0.0677737	0.291988	0.807894
Commd10	Commd10	ENSMUSG00000042705	69456	18	COMM domain containing 10 [Source:MGI Symbol;Acc:MGI:1916706]	5057	49.2861	4.05973	-0.289425	-3.26808	1.08108	2.18701	1.55606e-08	0.648945	2.30199e-06	0.0929313	0.0161218	2.61692e-07	0.786853	7.83968e-05	0.317537	0.120549
Dlk2	Dlk2	ENSMUSG00000047428	106565	17	delta-like 2 homolog (Drosophila) [Source:MGI Symbol;Acc:MGI:2146838]	10679	15.0644	4.05721	-1.5012	-3.56966	1.98875	1.58091	0.00717315	0.278301	0.0149068	0.161079	0.424496	0.0213457	0.46272	0.0745818	0.432232	0.721149
Klhdc4	Klhdc4	ENSMUSG00000040263	234825	8	kelch domain containing 4 [Source:MGI Symbol;Acc:MGI:2384569]	8160	25.5787	4.0568	0.747198	-2.857	0.452608	2.40439	5.20662e-09	0.229901	1.3198e-05	0.469497	0.00671585	9.71311e-08	0.406417	0.000331356	0.729866	0.0684866
Tmem208	Tmem208	ENSMUSG00000014856	66320	8	transmembrane protein 208 [Source:MGI Symbol;Acc:MGI:1913570]	4486	108.022	4.05345	-0.0337303	-3.14434	0.942836	2.2015	1.64097e-14	0.942531	5.14328e-10	0.0462943	0.00100718	9.06016e-13	0.97023	5.51239e-08	0.210705	0.0179617
Dock7	Dock7	ENSMUSG00000028556	67299	4	dedicator of cytokinesis 7 [Source:MGI Symbol;Acc:MGI:1914549]	10276	3.88032	4.04951	-3.19731	-4.39505	2.85178	1.54327	0.00919368	0.0335098	0.00547417	0.053916	0.436963	0.0262074	0.103747	0.0376207	0.230869	0.730745
Aurka	Aurka	ENSMUSG00000027496	20878	2	aurora kinase A [Source:MGI Symbol;Acc:MGI:894678]	10644	9.07627	4.04493	-3.72775	-2.65451	5.11817	-2.46366	0.00651681	0.00821408	0.0509043	0.000894024	0.198515	0.0198059	0.0360636	0.173252	0.0153189	0.505429
Tbc1d2	Tbc1d2	ENSMUSG00000039813	381605	4	TBC1 domain family, member 2 [Source:MGI Symbol;Acc:MGI:2652885]	10923	3.07019	4.04113	-0.802597	-2.444	2.39973	0.0442779	0.00555573	0.537616	0.0548234	0.10731	0.969518	0.0173827	0.701254	0.180823	0.344326	0.988952
Alas1	Alas1	ENSMUSG00000032786	11655	9	aminolevulinic acid synthase 1 [Source:MGI Symbol;Acc:MGI:87989]	5995	26.0373	4.04048	1.04746	-2.82621	0.166813	2.6594	3.04372e-15	0.0231077	5.12216e-09	0.716665	4.94275e-05	1.9123e-13	0.0788922	4.24208e-07	0.880381	0.00185684
Asphd2	Asphd2	ENSMUSG00000029348	72898	5	aspartate beta-hydroxylase domain containing 2 [Source:MGI Symbol;Acc:MGI:1920148]	8835	27.9925	4.04031	-3.47758	-3.68549	3.8324	-0.146912	2.6308e-06	3.2403e-05	1.26869e-05	6.91346e-06	0.891749	2.58865e-05	0.00044953	0.000322691	0.000351525	0.959758
Cep55	Cep55	ENSMUSG00000024989	74107	19	centrosomal protein 55 [Source:MGI Symbol;Acc:MGI:1921357]	10528	10.2167	4.0388	-0.919325	-2.63398	2.32414	0.309831	0.00176494	0.424742	0.0278284	0.0573114	0.858093	0.00661898	0.603338	0.115104	0.241197	0.948825
Slc34a3	Slc34a3	ENSMUSG00000006469	142681	2	solute carrier family 34 (sodium phosphate), member 3 [Source:MGI Symbol;Acc:MGI:2159410]	10695	8.52822	4.03494	-2.05729	-1.97266	4.11958	-2.14692	0.0135277	0.160303	0.177004	0.0119678	0.29811	0.0361665	0.316206	0.37808	0.0896725	0.612362
Arhgap11a	Arhgap11a	ENSMUSG00000041219	228482	2	Rho GTPase activating protein 11A [Source:MGI Symbol;Acc:MGI:2444300]	10449	5.38171	4.02072	1.85919	-2.25177	-0.0902426	2.34201	0.00113866	0.107754	0.0465234	0.938075	0.146838	0.00460347	0.240844	0.162594	0.976616	0.436204
Bard1	Bard1	ENSMUSG00000026196	12021	1	BRCA1 associated RING domain 1 [Source:MGI Symbol;Acc:MGI:1328361]	10370	5.10759	4.01834	0.258081	-2.42978	1.33048	1.09931	0.00117783	0.815215	0.0336308	0.245468	0.490152	0.00472688	0.895131	0.130004	0.538305	0.764292
Cyp4f13	Cyp4f13	ENSMUSG00000024055	170716	17	cytochrome P450, family 4, subfamily f, polypeptide 13 [Source:MGI Symbol;Acc:MGI:2158641]	8664	28.7141	4.0161	-0.0248256	-2.99454	1.04639	1.94816	4.41069e-07	0.972036	7.60802e-05	0.146383	0.0542109	5.21273e-06	0.986016	0.00142172	0.409001	0.256642
Mthfsd	Mthfsd	ENSMUSG00000031816	234814	8	methenyltetrahydrofolate synthetase domain containing [Source:MGI Symbol;Acc:MGI:2679252]	9902	22.2252	4.00527	-1.42258	-2.96212	2.46574	0.496386	0.000267922	0.152012	0.00451173	0.0172339	0.723235	0.00136567	0.305364	0.032885	0.113563	0.88898
Hdhd3	Hdhd3	ENSMUSG00000038422	72748	4	haloacid dehalogenase-like hydrolase domain containing 3 [Source:MGI Symbol;Acc:MGI:1919998]	8715	44.5068	4.0031	3.42674	-2.3126	-1.73624	4.04883	2.31107e-06	4.66734e-05	0.00320067	0.0305064	0.000303932	2.29679e-05	0.000605978	0.0256711	0.164377	0.0076206
Gen1	Gen1	ENSMUSG00000051235	209334	12	GEN1, Holliday junction 5' flap endonuclease [Source:MGI Symbol;Acc:MGI:2443149]	10834	5.55205	4.00021	0.774382	-2.21168	1.01416	1.19752	0.00293176	0.530376	0.065576	0.447619	0.520515	0.0101232	0.695712	0.203167	0.715559	0.783136
Pml	Pml	ENSMUSG00000036986	18854	9	promyelocytic leukemia [Source:MGI Symbol;Acc:MGI:104662]	8414	9.50486	4.00016	-0.153194	-2.81244	1.34092	1.47152	1.38595e-08	0.807088	2.38943e-05	0.0370377	0.099879	2.36001e-07	0.889621	0.000543061	0.18437	0.355082
Acot10	Acot10	ENSMUSG00000047565	64833	15	acyl-CoA thioesterase 10 [Source:MGI Symbol;Acc:MGI:1928940]	8327	33.8504	3.9986	1.05243	-2.49332	0.452847	2.04048	3.07155e-09	0.0838572	7.26772e-05	0.458464	0.0178157	6.02839e-08	0.201922	0.00136468	0.72317	0.128217
Enc1	Enc1	ENSMUSG00000041773	13803	13	ectodermal-neural cortex 1 [Source:MGI Symbol;Acc:MGI:109610]	10493	5.01697	3.98722	-1.50596	-2.49371	2.99948	-0.505763	0.00419363	0.229724	0.0530868	0.0254791	0.768843	0.0137301	0.406169	0.177205	0.146831	0.912238
Phf21b	Phf21b	ENSMUSG00000016624	271305	15	PHD finger protein 21B [Source:MGI Symbol;Acc:MGI:2443812]	9181	11.7142	3.98249	-0.720516	-2.95912	1.74389	1.21523	2.16794e-05	0.38998	0.000914376	0.0432264	0.30672	0.000161664	0.571712	0.0102313	0.201775	0.61956
Paox	Paox	ENSMUSG00000025464	212503	7	polyamine oxidase (exo-N4-amino) [Source:MGI Symbol;Acc:MGI:1916983]	9974	17.5254	3.98122	0.783021	-3.12255	0.0756515	3.0469	0.0157729	0.597008	0.048597	0.959187	0.152112	0.0407153	0.74691	0.167274	0.985418	0.442551
Agbl3	Agbl3	ENSMUSG00000038836	76223	6	ATP/GTP binding protein-like 3 [Source:MGI Symbol;Acc:MGI:1923473]	5890	54.0684	3.97775	0.935867	-2.63	0.411878	2.21813	3.63567e-23	0.00974131	2.79239e-12	0.257297	1.56211e-05	7.49909e-21	0.0411962	5.75969e-10	0.549752	0.00071154
Slitrk1	Slitrk1	ENSMUSG00000075478	76965	14	SLIT and NTRK-like family, member 1 [Source:MGI Symbol;Acc:MGI:2679446]	9767	8.50638	3.96902	-1.48047	-3.02246	2.42704	0.595425	0.000538374	0.154521	0.00575899	0.0244357	0.683114	0.00246772	0.308534	0.0389828	0.142775	0.87137
Mir568	Mir568	ENSMUSG00000076372		16	microRNA 568 [Source:MGI Symbol;Acc:MGI:3718548]	10319	348.423	3.96759	2.6624	-2.00416	-0.698958	2.70311	0.00102327	0.0226068	0.0686915	0.541798	0.08829	0.00422446	0.07766	0.209174	0.782319	0.333522
Klhl23	Klhl23	ENSMUSG00000042155	277396	2	kelch-like 23 [Source:MGI Symbol;Acc:MGI:2683536]	9586	8.04205	3.96653	-2.16612	-2.96476	3.16789	-0.203123	0.000866696	0.0491328	0.00896653	0.005913	0.890894	0.0036795	0.139078	0.0525025	0.0577667	0.959249
Polr2k	Polr2k	ENSMUSG00000045996	17749;100862456;102641086	15	polymerase (RNA) II (DNA directed) polypeptide K [Source:MGI Symbol;Acc:MGI:102725]	10441	41.2048	3.96561	5.7865	-0.53158	-2.35247	2.88405	0.00725005	0.00052476	0.681539	0.127695	0.149355	0.0215315	0.00427472	0.820608	0.380428	0.439238
Pcdhb15	Pcdhb15	ENSMUSG00000047033	93886	18	protocadherin beta 15 [Source:MGI Symbol;Acc:MGI:2136750]	8646	17.7422	3.95498	2.37101	-2.07103	-0.487063	2.5581	1.71674e-06	0.00232407	0.00643832	0.517789	0.0162488	1.78568e-05	0.0136596	0.0420201	0.766976	0.121152
Flrt1	Flrt1	ENSMUSG00000047787	396184	19	fibronectin leucine rich transmembrane protein 1 [Source:MGI Symbol;Acc:MGI:3026647]	10308	4.71361	3.94621	-0.560694	-2.6099	1.897	0.7129	0.00676515	0.66632	0.0560626	0.160687	0.702975	0.0204018	0.799936	0.183496	0.431593	0.88039
Lace1	Lace1	ENSMUSG00000038302	215951	10	lactation elevated 1 [Source:MGI Symbol;Acc:MGI:2148801]	9423	16.2599	3.93717	1.73013	-2.57825	-0.371214	2.94946	0.000107567	0.0657092	0.00688116	0.688598	0.0251688	0.000627492	0.170504	0.0440627	0.866259	0.160384
Mrpl4	Mrpl4	ENSMUSG00000003299	66163	9	mitochondrial ribosomal protein L4 [Source:MGI Symbol;Acc:MGI:2137210]	8257	38.8443	3.93297	0.226747	-3.02563	0.680598	2.34503	0.000230742	0.81184	0.0031217	0.477841	0.085674	0.00121225	0.892356	0.0252788	0.736675	0.328084
Dcbld1	Dcbld1	ENSMUSG00000019891	66686	10	discoidin, CUB and LCCL domain containing 1 [Source:MGI Symbol;Acc:MGI:1913936]	9323	13.8477	3.93212	1.95511	-2.50169	-0.524678	3.02636	8.32602e-05	0.0357254	0.00747334	0.565234	0.0195997	0.000499835	0.109031	0.0465254	0.800017	0.1363
Zfp524	Zfp524	ENSMUSG00000051184	66056	7	zinc finger protein 524 [Source:MGI Symbol;Acc:MGI:1916740]	10293	26.6589	3.92309	-2.29935	-3.38338	2.83905	0.544327	0.00160225	0.0477033	0.00508413	0.017302	0.734464	0.006118	0.136302	0.0357407	0.113843	0.894415
Gk5	Gk5	ENSMUSG00000041440	235533	9	glycerol kinase 5 (putative) [Source:MGI Symbol;Acc:MGI:2443336]	7422	21.783	3.91442	0.985224	-2.78708	0.14211	2.64497	3.16826e-09	0.0993458	8.77661e-06	0.811601	0.00186958	6.20706e-08	0.227455	0.000235739	0.922194	0.0283078
Proser3	Proser3	ENSMUSG00000036864	333193	7	proline and serine rich 3 [Source:MGI Symbol;Acc:MGI:2681861]	10415	10.657	3.91071	0.0557245	-3.34902	0.505966	2.84305	0.00573253	0.965372	0.014859	0.696423	0.123881	0.0178541	0.982023	0.0744446	0.870389	0.396565
Pcdhb4	Pcdhb4	ENSMUSG00000045689	93875	18	protocadherin beta 4 [Source:MGI Symbol;Acc:MGI:2136738]	10052	8.82629	3.9054	1.94577	-1.90412	0.0555084	1.84861	0.00155053	0.0895726	0.0914954	0.960743	0.243825	0.00593916	0.211401	0.250182	0.98551	0.559587
Tmem25	Tmem25	ENSMUSG00000002032	71687	9	transmembrane protein 25 [Source:MGI Symbol;Acc:MGI:1918937]	9965	14.4883	3.90372	1.47694	-1.9082	0.518576	1.38962	0.00149053	0.187954	0.0897642	0.642725	0.376376	0.00573545	0.351955	0.247242	0.846317	0.681856
Pkdcc	Pkdcc	ENSMUSG00000024247	106522	17	protein kinase domain containing, cytoplasmic [Source:MGI Symbol;Acc:MGI:2147077]	10002	13.9797	3.90229	-0.133516	-2.70511	1.33069	1.37442	0.000502059	0.894183	0.0105592	0.196793	0.338284	0.00233355	0.943279	0.0585362	0.478928	0.651537
Ldoc1l	Ldoc1l	ENSMUSG00000055745	223732	15	leucine zipper, down-regulated in cancer 1-like [Source:MGI Symbol;Acc:MGI:2675858]	6693	14.5947	3.89937	-0.93894	-3.19646	1.64186	1.5546	3.21899e-09	0.113199	5.22324e-07	0.00658066	0.0632779	6.29517e-08	0.248492	2.15474e-05	0.0614746	0.27759
Snord99	Snord99	ENSMUSG00000080615		4	small nucleolar RNA, C/D box 99 [Source:MGI Symbol;Acc:MGI:3819570]	10853	309.556	3.8964	4.12153	-1.64207	-1.8672	3.50927	0.00241496	0.00562993	0.14187	0.245236	0.0749359	0.00865017	0.0272097	0.330334	0.538305	0.305102
Pola2	Pola2	ENSMUSG00000024833	18969	19	polymerase (DNA directed), alpha 2 [Source:MGI Symbol;Acc:MGI:99690]	9308	17.2256	3.89307	0.331897	-3.18185	0.379322	2.80253	0.000477787	0.740211	0.0031397	0.705945	0.0514314	0.00223291	0.848526	0.0253564	0.874854	0.248893
Ctu2	Ctu2	ENSMUSG00000049482	66965	8	cytosolic thiouridylase subunit 2 [Source:MGI Symbol;Acc:MGI:1914215]	9478	12.8529	3.89157	-0.0772469	-2.92985	1.03896	1.89089	0.00122574	0.94278	0.0108695	0.341466	0.218882	0.00487264	0.970386	0.0595021	0.62992	0.53162
Wnt5b	Wnt5b	ENSMUSG00000030170	22419	6	wingless-type MMTV integration site family, member 5B [Source:MGI Symbol;Acc:MGI:98959]	8834	19.7765	3.88938	-0.260483	-3.27751	0.87236	2.40515	8.01957e-05	0.768154	0.000620496	0.328196	0.0574381	0.0004849	0.863741	0.00755375	0.617529	0.263608
Tmem129	Tmem129	ENSMUSG00000019295	68366	5	transmembrane protein 129 [Source:MGI Symbol;Acc:MGI:1915616]	7087	27.4788	3.88878	-0.353501	-3.07114	1.17114	1.89999	2.2118e-09	0.543585	9.062e-07	0.0475605	0.0220182	4.45294e-08	0.705724	3.43979e-05	0.213437	0.147645
Sigmar1	Sigmar1	ENSMUSG00000036078	18391	4	sigma non-opioid intracellular receptor 1 [Source:MGI Symbol;Acc:MGI:1195268]	8292	35.021	3.88673	-0.171304	-2.89578	1.16225	1.73353	4.23226e-08	0.78733	1.85354e-05	0.0724055	0.0555718	6.44052e-07	0.876892	0.000434827	0.272825	0.259842
Coprs	Coprs	ENSMUSG00000031458	66423	8	coordinator of PRMT5, differentiation stimulator [Source:MGI Symbol;Acc:MGI:1913673]	7779	70.9057	3.88664	-0.207999	-2.97196	1.12268	1.84927	5.98939e-09	0.728067	3.37401e-06	0.064936	0.0302261	1.10229e-07	0.840948	0.000107122	0.258326	0.180663
Lepre1	Lepre1					9307	13.5175	3.88304	-0.342057	-3.02568	1.19942	1.82626	0.000529462	0.733134	0.00491677	0.2396	0.201921	0.00243606	0.8448	0.0349027	0.533313	0.508501
Tsen2	Tsen2	ENSMUSG00000042389	381802	6	tRNA splicing endonuclease subunit 2 [Source:MGI Symbol;Acc:MGI:2141599]	8079	30.8166	3.88134	0.0447971	-2.81273	1.02381	1.78892	7.31837e-09	0.940593	1.03472e-05	0.0939315	0.0369815	1.32458e-07	0.969379	0.000269967	0.319017	0.204954
Endog	Endog	ENSMUSG00000015337	13804	2	endonuclease G [Source:MGI Symbol;Acc:MGI:1261433]	7903	51.8388	3.87907	-1.07184	-3.14713	1.80378	1.34335	4.41001e-05	0.21094	0.000603042	0.039254	0.265165	0.000291829	0.382293	0.00738237	0.191423	0.581596
Acad12	Acad12	ENSMUSG00000042647	71985;338350	5	acyl-Coenzyme A dehydrogenase family, member 12 [Source:MGI Symbol;Acc:MGI:2443320]	10706	8.23378	3.86867	-0.436081	-1.25538	3.04937	-1.79399	0.0139513	0.751568	0.365845	0.046683	0.366382	0.0370949	0.854158	0.582242	0.211324	0.674934
Cenpp	Cenpp	ENSMUSG00000021391	66336	13	centromere protein P [Source:MGI Symbol;Acc:MGI:1913586]	10642	20.249	3.86047	0.274887	-1.87713	1.70845	0.168674	0.00773217	0.831577	0.153055	0.210955	0.936337	0.0226435	0.905278	0.345988	0.497232	0.978334
1810043G02Rik	1810043G02Rik	ENSMUSG00000020284	67884	10	RIKEN cDNA 1810043G02 gene [Source:MGI Symbol;Acc:MGI:1915134]	10047	19.1234	3.85719	-1.16476	-3.10469	1.91725	1.18744	0.0251383	0.454986	0.0618051	0.229471	0.588816	0.0597676	0.632169	0.196012	0.520884	0.825064
Efcc1	Efcc1	ENSMUSG00000068263	58229	6	EF hand and coiled-coil domain containing 1 [Source:MGI Symbol;Acc:MGI:3611451]	10540	9.11266	3.85213	0.794915	-2.07209	0.985124	1.08696	0.0154725	0.579715	0.156975	0.501609	0.59804	0.04012	0.733584	0.351624	0.754899	0.829152
Hemk1	Hemk1	ENSMUSG00000032579	69536	9	HemK methyltransferase family member 1 [Source:MGI Symbol;Acc:MGI:1916786]	8789	21.2804	3.84563	-1.06202	-3.10516	1.80249	1.30268	0.000122542	0.240659	0.001316	0.0513842	0.306795	0.000701012	0.418731	0.0134637	0.224114	0.619598
Slc25a22	Slc25a22	ENSMUSG00000019082	68267	7	solute carrier family 25 (mitochondrial carrier, glutamate), member 22 [Source:MGI Symbol;Acc:MGI:1915517]	10429	10.4966	3.83919	1.60597	-2.27702	-0.0438004	2.32082	0.00285554	0.180705	0.0562943	0.97093	0.168082	0.00991325	0.342132	0.183874	0.989127	0.466418
Tcf7l1	Tcf7l1	ENSMUSG00000055799	21415	6	transcription factor 7 like 1 (T cell specific, HMG box) [Source:MGI Symbol;Acc:MGI:1202876]	9788	12.8227	3.839	1.51076	-2.68699	-0.358748	3.04574	0.000534166	0.140759	0.0104768	0.724123	0.0352782	0.00245357	0.289527	0.0583158	0.884522	0.20024
Gmeb2	Gmeb2	ENSMUSG00000038705	229004	2	glucocorticoid modulatory element binding protein 2 [Source:MGI Symbol;Acc:MGI:2652836]	8119	13.0085	3.83204	-0.143654	-3.08491	0.890789	2.19412	1.95299e-05	0.858282	0.000370078	0.273111	0.0565782	0.000148677	0.923014	0.00503196	0.566068	0.262417
Ercc1	Ercc1	ENSMUSG00000003549	13870	7	excision repair cross-complementing rodent repair deficiency, complementation group 1 [Source:MGI Symbol;Acc:MGI:95412]	7356	55.9223	3.83142	-0.0164317	-2.53459	1.31326	1.22132	1.17393e-12	0.972858	5.82647e-07	0.00795409	0.0755825	4.58337e-11	0.986497	2.35037e-05	0.0682453	0.306754
Mfsd9	Mfsd9	ENSMUSG00000041945	211798	1	major facilitator superfamily domain containing 9 [Source:MGI Symbol;Acc:MGI:2443548]	9758	11.933	3.82533	-1.0464	-2.96781	1.90392	1.06389	0.000261352	0.270187	0.00313376	0.0511952	0.427486	0.00133822	0.45313	0.0253564	0.223763	0.723795
Oscp1	Oscp1	ENSMUSG00000042616	230751	4	organic solute carrier partner 1 [Source:MGI Symbol;Acc:MGI:1916308]	9469	18.1548	3.81561	-1.86391	-2.70327	2.97625	-0.272975	0.000163066	0.0455413	0.00483721	0.00232836	0.830344	0.000896901	0.131813	0.0345509	0.0305565	0.936414
Aar2	Aar2	ENSMUSG00000027628	68295	2	AAR2 splicing factor homolog [Source:MGI Symbol;Acc:MGI:1915545]	7813	16.2406	3.81538	-0.5247	-3.12879	1.21129	1.91751	1.31652e-06	0.459427	4.16952e-05	0.0921859	0.0575717	1.40824e-05	0.636128	0.000848811	0.315818	0.263733
Zbtb45	Zbtb45	ENSMUSG00000049600	232879	7	zinc finger and BTB domain containing 45 [Source:MGI Symbol;Acc:MGI:2685003]	9146	21.1586	3.8152	0.984081	-2.36727	0.463858	1.90341	1.26296e-05	0.214805	0.00378464	0.559848	0.0899909	0.000101744	0.386989	0.0291981	0.796472	0.33569
Mks1	Mks1	ENSMUSG00000034121	380718	11	Meckel syndrome, type 1 [Source:MGI Symbol;Acc:MGI:3584243]	7518	24.9463	3.8143	0.0127871	-2.94533	0.85618	2.08915	2.2868e-08	0.983352	6.93305e-06	0.167115	0.0170542	3.7126e-07	0.991491	0.000194838	0.440231	0.124777
Zfp114	Zfp114	ENSMUSG00000068962	232966	7	zinc finger protein 114 [Source:MGI Symbol;Acc:MGI:3037815]	9998	13.3014	3.81304	-4.01959	-3.23664	4.59599	-1.35935	0.000964801	0.000507707	0.00382975	0.000118185	0.359904	0.00403181	0.00417374	0.0293802	0.00334715	0.670382
Slc35g2	Slc35g2	ENSMUSG00000070287	245020	9	solute carrier family 35, member G2 [Source:MGI Symbol;Acc:MGI:2685365]	8124	33.5823	3.81032	-0.0267935	-3.25767	0.579442	2.67823	0.000149768	0.976299	0.0008781	0.522649	0.0388497	0.000835821	0.987957	0.00988609	0.77013	0.211677
Ctss	Ctss	ENSMUSG00000038642	13040	3	cathepsin S [Source:MGI Symbol;Acc:MGI:107341]	10355	21.1593	3.80852	1.95026	-2.02074	-0.162477	2.18322	0.00167037	0.0875772	0.0695631	0.88625	0.168254	0.00632946	0.207959	0.210652	0.953872	0.466418
Urgcp	Urgcp	ENSMUSG00000049680	72046	11	upregulator of cell proliferation [Source:MGI Symbol;Acc:MGI:1919296]	7046	12.1931	3.80819	0.885602	-2.55795	0.364641	2.19331	1.82994e-12	0.0708775	5.27612e-07	0.457949	0.00161892	6.87455e-11	0.179734	2.16836e-05	0.723065	0.0256221
Tpcn1	Tpcn1	ENSMUSG00000032741	252972	5	two pore channel 1 [Source:MGI Symbol;Acc:MGI:2182472]	8491	10.9971	3.80411	1.5372	-2.16375	0.103157	2.0606	1.38642e-07	0.0208349	0.0012591	0.875501	0.0267245	1.87347e-06	0.0729556	0.0130469	0.94856	0.165807
4930594C11Rik	4930594C11Rik	ENSMUSG00000103948		1	RIKEN cDNA 4930594C11 gene [Source:MGI Symbol;Acc:MGI:1924883]	10819	6.74582	3.80137	0.775685	-2.04604	0.979637	1.06641	0.00363711	0.519208	0.0819624	0.447266	0.552492	0.012163	0.687211	0.233033	0.715559	0.804233
Mpdu1	Mpdu1	ENSMUSG00000018761	24070	11	mannose-P-dolichol utilization defect 1 [Source:MGI Symbol;Acc:MGI:1346040]	8979	34.9419	3.80046	0.384822	-2.98226	0.433379	2.54888	8.20027e-05	0.658269	0.00131657	0.620106	0.0408891	0.000493914	0.794633	0.0134637	0.833825	0.21699
Axin1	Axin1	ENSMUSG00000024182	12005	17	axin 1 [Source:MGI Symbol;Acc:MGI:1096327]	6410	18.4663	3.79662	-0.247487	-2.7001	1.344	1.3561	3.46736e-17	0.540785	2.71381e-10	0.00117274	0.0184692	3.03241e-15	0.704463	3.1561e-08	0.018669	0.131107
Sclt1	Sclt1	ENSMUSG00000059834	67161	3	sodium channel and clathrin linker 1 [Source:MGI Symbol;Acc:MGI:1914411]	6935	20.7918	3.77841	0.682294	-2.70082	0.395295	2.30552	1.22132e-08	0.254839	1.88369e-05	0.510053	0.0069353	2.1026e-07	0.436184	0.000440954	0.762151	0.0702006
A630072M18Rik	A630072M18Rik	ENSMUSG00000101013		5	RIKEN cDNA A630072M18 gene [Source:MGI Symbol;Acc:MGI:2444702]	8557	9.2628	3.77427	3.05549	-1.12734	-0.408556	1.5359	0.000624108	0.0043203	0.258292	0.683125	0.276589	0.00281119	0.0222361	0.472973	0.864519	0.592643
Murc	Murc	ENSMUSG00000028348	68016	4	muscle-related coiled-coil protein [Source:MGI Symbol;Acc:MGI:1915266]	7697	27.6118	3.77026	-0.180055	-2.77022	1.18009	1.59013	3.18899e-06	0.804314	0.000338706	0.110131	0.124371	3.05272e-05	0.888051	0.00469717	0.349174	0.397203
Shfm1	Shfm1					8094	111.106	3.76986	0.206811	-2.43388	1.12917	1.30471	4.54696e-09	0.720579	5.66728e-05	0.0555534	0.112792	8.59988e-08	0.836726	0.00110633	0.236032	0.376515
Cenpu	Cenpu	ENSMUSG00000031629	71876	8	centromere protein U [Source:MGI Symbol;Acc:MGI:1919126]	10742	8.41844	3.76542	-1.92749	-2.95335	2.73955	0.213798	0.00731205	0.138677	0.0271028	0.0445301	0.916142	0.0216627	0.28623	0.113044	0.205489	0.969181
Slc39a12	Slc39a12	ENSMUSG00000036949	277468	2	solute carrier family 39 (zinc transporter), member 12 [Source:MGI Symbol;Acc:MGI:2139274]	10813	6.956	3.76362	2.73991	-2.51379	-1.49008	4.00387	0.00333673	0.0488705	0.0343112	0.300558	0.0322349	0.0113038	0.138587	0.131608	0.59178	0.188143
2410004N09Rik	2410004N09Rik					9742	97.5539	3.75667	1.84758	-3.07884	-1.16974	4.24858	0.00372076	0.128957	0.014088	0.330228	0.0138318	0.0124182	0.272628	0.0716601	0.619561	0.110211
Mmd2	Mmd2	ENSMUSG00000039533	75104	5	monocyte to macrophage differentiation-associated 2 [Source:MGI Symbol;Acc:MGI:1922354]	5617	34.7457	3.75633	-0.116638	-2.4913	1.38167	1.10963	9.1939e-22	0.740504	1.56752e-11	0.000130197	0.0266751	1.62109e-19	0.848526	2.67752e-09	0.00364018	0.165755
Basp1	Basp1	ENSMUSG00000045763	70350	15	brain abundant, membrane attached signal protein 1 [Source:MGI Symbol;Acc:MGI:1917600]	10878	8.88111	3.75543	0.408588	-2.12522	1.22162	0.903599	0.00428136	0.736215	0.0710046	0.356965	0.630964	0.0139588	0.846477	0.213776	0.641305	0.846552
Gja1	Gja1	ENSMUSG00000050953	14609	10	gap junction protein, alpha 1 [Source:MGI Symbol;Acc:MGI:95713]	10521	7.616	3.75427	-1.23954	-2.06154	2.93227	-0.870734	0.00739773	0.326916	0.109872	0.0311577	0.622513	0.0218416	0.511865	0.280309	0.16621	0.842137
AV039307	AV039307	ENSMUSG00000087519		2	expressed sequence AV039307 [Source:MGI Symbol;Acc:MGI:2139243]	9765	31.057	3.75363	0.904869	-2.7275	0.121262	2.60624	0.00102191	0.385413	0.0122605	0.907398	0.0792403	0.00422043	0.567147	0.0651588	0.962455	0.314346
Skp2	Skp2	ENSMUSG00000054115	27401	15	S-phase kinase-associated protein 2 (p45) [Source:MGI Symbol;Acc:MGI:1351663]	7374	18.9203	3.75268	1.02454	-2.54525	0.182891	2.36236	1.631e-11	0.0439874	1.3577e-06	0.718847	0.00104751	5.30658e-10	0.12833	4.93104e-05	0.881386	0.0185598
Apool	Apool	ENSMUSG00000025525	68117	X	apolipoprotein O-like [Source:MGI Symbol;Acc:MGI:1915367]	5239	81.5366	3.75133	0.935379	-2.53298	0.282972	2.25001	4.80899e-23	0.00679284	1.65637e-12	0.413004	4.39421e-06	9.55852e-21	0.0312934	4.02387e-10	0.688361	0.000251505
Snord104	Snord104	ENSMUSG00000065126		11	small nucleolar RNA, C/D box 104 [Source:MGI Symbol;Acc:MGI:3819515]	9858	494.672	3.7484	2.43734	-1.78483	-0.47377	2.2586	0.000848591	0.0230297	0.0836368	0.648323	0.121827	0.00361951	0.0787312	0.235775	0.848697	0.392701
2900055J20Rik	2900055J20Rik	ENSMUSG00000071860		18	RIKEN cDNA 2900055J20 gene [Source:MGI Symbol;Acc:MGI:1920251]	10890	20.6732	3.74615	0.724379	-1.64579	1.37598	0.269809	0.0114545	0.589376	0.206256	0.350653	0.914526	0.0315058	0.740412	0.414655	0.636153	0.96876
N6amt2	N6amt2					5421	91.5133	3.74131	0.599114	-2.67644	0.465757	2.21069	1.05094e-16	0.141833	4.5179e-10	0.255248	0.000142295	8.51027e-15	0.290741	4.93897e-08	0.547308	0.00428531
Ncf2	Ncf2	ENSMUSG00000026480	17970	1	neutrophil cytosolic factor 2 [Source:MGI Symbol;Acc:MGI:97284]	8602	19.2708	3.74061	3.11091	-1.94386	-1.31416	3.25803	1.9032e-07	1.17133e-05	0.00340413	0.0530247	0.000592862	2.48575e-06	0.00019431	0.0269081	0.228575	0.0122982
Wdr90	Wdr90	ENSMUSG00000073434	106618	17	WD repeat domain 90 [Source:MGI Symbol;Acc:MGI:1921267]	10101	4.1185	3.7374	-4.64496	-2.94206	5.4403	-2.49824	0.00421837	0.000532499	0.0185582	0.000103946	0.14192	0.0137987	0.0043168	0.0872593	0.00302218	0.428111
Cenpw	Cenpw	ENSMUSG00000075266	66311	10	centromere protein W [Source:MGI Symbol;Acc:MGI:1913561]	10860	11.2055	3.73571	5.9331	-1.44978	-3.64717	5.09694	0.00351017	0.00082883	0.193495	0.059143	0.0224659	0.0118144	0.00611801	0.399481	0.245091	0.149754
1600023N17Rik	1600023N17Rik	ENSMUSG00000104986		5	RIKEN cDNA 1600023N17 gene [Source:MGI Symbol;Acc:MGI:1917038]	10571	24.4217	3.73414	2.97572	-1.8329	-1.07448	2.90738	0.00243876	0.0166842	0.102529	0.38485	0.0818379	0.00872437	0.0619747	0.267889	0.664442	0.319518
Gm10012	Gm10012	ENSMUSG00000057580		17	predicted pseudogene 10012 [Source:MGI Symbol;Acc:MGI:3642454]	10849	48.0238	3.72229	1.05979	-2.23283	0.429665	1.80317	0.00268067	0.374062	0.0469338	0.736693	0.299281	0.00943855	0.557118	0.163506	0.891293	0.61418
Pxn	Pxn	ENSMUSG00000029528	19303	5	paxillin [Source:MGI Symbol;Acc:MGI:108295]	7534	15.9103	3.7215	-0.0343358	-2.87318	0.882651	1.99053	5.62424e-08	0.955675	1.29063e-05	0.15775	0.0240264	8.30867e-07	0.977767	0.00032589	0.427709	0.15588
Sirpa	Sirpa	ENSMUSG00000037902	19261	2	signal-regulatory protein alpha [Source:MGI Symbol;Acc:MGI:108563]	7586	15.3558	3.7176	1.67299	-2.31016	-0.265545	2.5757	8.48052e-11	0.0016987	1.70984e-05	0.61335	0.00054537	2.40179e-09	0.0107218	0.000410595	0.831202	0.0116445
Dnajb5	Dnajb5	ENSMUSG00000036052	56323	4	DnaJ heat shock protein family (Hsp40) member B5 [Source:MGI Symbol;Acc:MGI:1930018]	9203	18.614	3.71336	-1.9072	-2.85621	2.76436	0.0918477	2.81758e-05	0.020461	0.000786562	0.00119627	0.93649	0.000200142	0.0719459	0.00910099	0.0188982	0.978334
Cdkn1a	Cdkn1a	ENSMUSG00000023067	12575	17	cyclin-dependent kinase inhibitor 1A (P21) [Source:MGI Symbol;Acc:MGI:104556]	10779	8.1056	3.70233	-2.63869	-1.68795	4.65306	-2.96511	0.0171732	0.0608676	0.219461	0.00356563	0.140197	0.0435483	0.162033	0.430417	0.0409018	0.425224
Atp5g2	Atp5g2	ENSMUSG00000062683	67942	15	ATP synthase, H+ transporting, mitochondrial F0 complex, subunit C2 (subunit 9) [Source:MGI Symbol;Acc:MGI:1915192]	10564	26.3201	3.69587	-3.79478	-2.33621	5.15445	-2.81823	0.0264164	0.0201249	0.130681	0.00346199	0.193617	0.0622034	0.0710154	0.312333	0.0400823	0.499649
E130012A19Rik	E130012A19Rik					10840	6.90785	3.68992	0.315578	-1.67973	1.69461	-0.0148781	0.017321	0.82054	0.22725	0.257407	0.978455	0.0438622	0.897642	0.438691	0.549818	0.992213
Mrps18b	Mrps18b	ENSMUSG00000024436	66973	17	mitochondrial ribosomal protein S18B [Source:MGI Symbol;Acc:MGI:1914223]	9193	42.2188	3.68919	-1.38035	-2.88328	2.18626	0.697016	2.64145e-05	0.0863166	0.000639861	0.00833014	0.535887	0.000190101	0.205713	0.0077063	0.0704259	0.792661
Paqr9	Paqr9	ENSMUSG00000064225	75552	9	progestin and adipoQ receptor family member IX [Source:MGI Symbol;Acc:MGI:1922802]	7802	14.1376	3.68746	-7.07929	-3.37961	7.38713	-4.00752	2.69213e-05	1.86183e-12	8.75101e-05	4.80581e-13	0.000652963	0.000192986	1.64141e-10	0.0015971	1.45936e-10	0.013268
Frmd6	Frmd6	ENSMUSG00000048285	319710	12	FERM domain containing 6 [Source:MGI Symbol;Acc:MGI:2442579]	10084	6.70276	3.68514	-2.76289	-3.01877	3.42926	-0.410489	0.00164244	0.0136463	0.0076091	0.00307557	0.783073	0.00624743	0.0532789	0.0469959	0.0367857	0.917066
Fam184b	Fam184b	ENSMUSG00000015879	58227	5	family with sequence similarity 184, member B [Source:MGI Symbol;Acc:MGI:2442958]	9958	8.50636	3.68254	-0.984693	-2.52679	2.14044	0.386349	0.000845237	0.325738	0.0155311	0.040011	0.78657	0.00360942	0.510386	0.0768263	0.193969	0.918208
Mtg2	Mtg2	ENSMUSG00000039069	52856	2	mitochondrial ribosome associated GTPase 2 [Source:MGI Symbol;Acc:MGI:106565]	10527	12.7875	3.67621	-3.59671	-2.84338	4.42955	-1.58617	0.00469279	0.0046303	0.0214683	0.000915645	0.348274	0.0150931	0.023467	0.0965697	0.0156027	0.660668
Arhgef19	Arhgef19	ENSMUSG00000028919	213649	4	Rho guanine nucleotide exchange factor (GEF) 19 [Source:MGI Symbol;Acc:MGI:1925912]	9487	12.2508	3.67589	-0.503362	-2.72115	1.4581	1.26305	0.000114311	0.559423	0.00280663	0.0986189	0.30285	0.000661192	0.719689	0.0235834	0.327492	0.616729
Gpr157	Gpr157	ENSMUSG00000047875	269604	4	G protein-coupled receptor 157 [Source:MGI Symbol;Acc:MGI:2442046]	10881	2.81139	3.6718	-3.77976	-2.77888	4.67268	-1.8938	0.0137335	0.00691552	0.0436744	0.00194854	0.350683	0.0366003	0.0317249	0.155927	0.0268618	0.661612
Zfp808	Zfp808	ENSMUSG00000074867	630579	13	zinc finger protein 80 [Source:MGI Symbol;Acc:MGI:3704127]	10563	6.13576	3.67124	-2.53473	-1.93907	4.26691	-2.32784	0.0255549	0.0998141	0.199179	0.0112912	0.271787	0.0606336	0.22823	0.406766	0.0864998	0.587313
BC004004	BC004004	ENSMUSG00000052712	80748	17	cDNA sequence BC004004 [Source:MGI Symbol;Acc:MGI:2136782]	5937	25.7876	3.67081	0.208845	-2.54072	0.921241	1.61948	3.39317e-20	0.562668	1.87919e-11	0.0118935	0.00161493	4.75566e-18	0.721705	3.16051e-09	0.0892995	0.0256221
Gm12522	Gm12522	ENSMUSG00000074281		3	predicted gene 12522 [Source:MGI Symbol;Acc:MGI:3651334]	10681	8.12429	3.66848	-0.226349	-1.33632	2.55851	-1.22219	0.0170497	0.868415	0.332708	0.084901	0.529941	0.0432673	0.928915	0.551725	0.301957	0.789778
6430503K07Rik	6430503K07Rik	ENSMUSG00000053545		2	RIKEN cDNA 6430503K07 gene [Source:MGI Symbol;Acc:MGI:1925318]	9112	83.1234	3.66809	1.4556	-1.34448	0.868001	0.476482	0.00227988	0.187355	0.220509	0.428719	0.756903	0.00823923	0.351194	0.431776	0.700876	0.906195
Ccdc71	Ccdc71	ENSMUSG00000049305	72454	9	coiled-coil domain containing 71 [Source:MGI Symbol;Acc:MGI:1919704]	7962	17.9931	3.66636	1.46827	-2.28912	-0.0910364	2.38015	1.86652e-09	0.00943105	6.52761e-05	0.870908	0.00270459	3.82829e-08	0.040195	0.00124127	0.946373	0.0370509
Dusp19	Dusp19	ENSMUSG00000027001	68082	2	dual specificity phosphatase 19 [Source:MGI Symbol;Acc:MGI:1915332]	9638	24.1222	3.66204	-2.90702	-2.74923	3.81983	-1.0706	0.000634043	0.00482612	0.00731427	0.000400712	0.435513	0.00284422	0.024313	0.0459011	0.00852254	0.72973
Sae1	Sae1	ENSMUSG00000052833	56459	7	SUMO1 activating enzyme subunit 1 [Source:MGI Symbol;Acc:MGI:1929264]	8167	29.4016	3.66031	-1.08982	-2.72814	2.022	0.706136	2.1029e-07	0.0900529	5.32582e-05	0.00227127	0.434527	2.71061e-06	0.212168	0.00105284	0.0300964	0.728901
Zkscan6	Zkscan6	ENSMUSG00000018347	52712	11	zinc finger with KRAB and SCAN domains 6 [Source:MGI Symbol;Acc:MGI:1289293]	8169	23.486	3.65262	-0.958216	-2.81275	1.79809	1.01466	2.62479e-08	0.108969	8.21138e-06	0.00336902	0.228617	4.16462e-07	0.242715	0.000224417	0.0393906	0.543442
Frzb	Frzb	ENSMUSG00000027004	20378	2	frizzled-related protein [Source:MGI Symbol;Acc:MGI:892032]	9821	11.8732	3.65098	-2.18012	-2.76301	3.06809	-0.305082	0.00258683	0.0551928	0.0173571	0.00948362	0.842637	0.0091489	0.151486	0.083622	0.0772925	0.942085
Cecr5	Cecr5	ENSMUSG00000058979	214932	6	cat eye syndrome chromosome region, candidate 5 [Source:MGI Symbol;Acc:MGI:2136976]	9557	20.9692	3.64848	1.30762	-2.82397	-0.483112	3.30708	0.00116419	0.208692	0.00900326	0.639555	0.0253828	0.00468591	0.3791	0.0525897	0.844397	0.160733
Wdr4	Wdr4	ENSMUSG00000024037	57773	17	WD repeat domain 4 [Source:MGI Symbol;Acc:MGI:1889002]	10708	5.57508	3.64825	1.7895	-2.1993	-0.340552	2.53985	0.00237312	0.127582	0.0470015	0.778	0.121626	0.00852545	0.270557	0.163675	0.907404	0.392701
Zbed5	Zbed5	ENSMUSG00000034173	71970	5	zinc finger, BED type containing 5 [Source:MGI Symbol;Acc:MGI:1919220]	8430	20.8956	3.64206	0.63687	-2.329	0.67619	1.65281	1.00376e-07	0.305703	0.000300161	0.28111	0.0611207	1.389e-06	0.490453	0.00425047	0.574226	0.272345
D17Wsu104e	D17Wsu104e					6120	76.5372	3.64172	0.287154	-2.80996	0.544602	2.26536	2.32433e-08	0.626242	7.59781e-06	0.357821	0.00721206	3.75326e-07	0.769021	0.00021081	0.641789	0.0716096
Far2	Far2	ENSMUSG00000030303	330450	6	fatty acyl CoA reductase 2 [Source:MGI Symbol;Acc:MGI:2687035]	9106	13.3706	3.62561	0.239007	-2.46104	0.925555	1.53549	3.68619e-05	0.763959	0.00313668	0.251637	0.175513	0.000250762	0.861692	0.0253564	0.544388	0.475711
Lacc1	Lacc1	ENSMUSG00000044350	210808	14	laccase (multicopper oxidoreductase) domain containing 1 [Source:MGI Symbol;Acc:MGI:2445077]	9693	15.3975	3.6242	5.08028	-0.885483	-2.34157	3.22705	0.00255918	0.000105202	0.41486	0.0492806	0.0445972	0.00906869	0.00116758	0.623831	0.218909	0.228694
Galk1	Galk1	ENSMUSG00000020766	14635	11	galactokinase 1 [Source:MGI Symbol;Acc:MGI:95730]	10578	14.3449	3.61195	-1.25926	-2.03073	2.84048	-0.809759	0.0147216	0.349613	0.138585	0.0486422	0.666059	0.0386402	0.534092	0.325361	0.217043	0.863948
Nrap	Nrap	ENSMUSG00000049134	18175	19	nebulin-related anchoring protein [Source:MGI Symbol;Acc:MGI:1098765]	8307	9.79305	3.60714	1.09099	-2.40093	0.11523	2.2857	1.03493e-06	0.107847	0.000597784	0.864559	0.0172457	1.1405e-05	0.240954	0.00733442	0.944239	0.125686
Zbtb17	Zbtb17	ENSMUSG00000006215	22642	4	zinc finger and BTB domain containing 17 [Source:MGI Symbol;Acc:MGI:107410]	7993	16.2867	3.60636	1.19439	-2.15361	0.258367	1.89524	7.83095e-09	0.0378547	0.000236415	0.652219	0.0192416	1.40803e-07	0.114634	0.00352111	0.850944	0.134408
Astn1	Astn1	ENSMUSG00000026587	11899	1	astrotactin 1 [Source:MGI Symbol;Acc:MGI:1098567]	9305	6.01646	3.60451	0.827953	-2.40979	0.366768	2.04302	9.52254e-05	0.327074	0.00587572	0.664978	0.0884086	0.000561491	0.511894	0.0395039	0.855441	0.333522
Cad	Cad	ENSMUSG00000013629	69719	5	carbamoyl-phosphate synthetase 2, aspartate transcarbamylase, and dihydroorotase [Source:MGI Symbol;Acc:MGI:1916969]	9610	5.80343	3.59073	0.558583	-2.44512	0.587029	1.85809	0.000311084	0.538354	0.00965443	0.521282	0.150403	0.00154933	0.701966	0.0552288	0.769019	0.440881
Anxa9	Anxa9	ENSMUSG00000015702	71790	3	annexin A9 [Source:MGI Symbol;Acc:MGI:1923711]	10284	15.851	3.58862	2.94646	-0.230651	0.411517	-0.180866	0.0236531	0.0556524	0.871096	0.77837	0.928182	0.0568922	0.152327	0.933931	0.907458	0.97485
Ap3m2	Ap3m2	ENSMUSG00000031539	64933	8	adaptor-related protein complex 3, mu 2 subunit [Source:MGI Symbol;Acc:MGI:1929214]	5192	23.0376	3.58723	-0.526604	-2.8848	1.22903	1.65576	3.11202e-11	0.282642	3.49027e-08	0.013376	0.0173759	9.55634e-10	0.466815	2.23132e-06	0.096967	0.126172
Lenep	Lenep	ENSMUSG00000078173	57275	3	lens epithelial protein [Source:MGI Symbol;Acc:MGI:1930020]	10339	41.9474	3.58498	-0.624413	-2.16682	2.04257	0.124252	0.0046913	0.586743	0.0676619	0.0893859	0.942875	0.0150928	0.738121	0.207189	0.310113	0.981104
3110009E18Rik	3110009E18Rik	ENSMUSG00000026388	73103	1	RIKEN cDNA 3110009E18 gene [Source:MGI Symbol;Acc:MGI:1920353]	10555	18.5406	3.58369	-1.85978	-1.17057	4.2729	-3.10233	0.0443324	0.255752	0.466746	0.0197997	0.18099	0.0952758	0.437129	0.667076	0.124468	0.481524
Btc	Btc	ENSMUSG00000082361	12223	5	betacellulin, epidermal growth factor family member [Source:MGI Symbol;Acc:MGI:99439]	10098	11.4878	3.58001	0.917811	-2.49006	0.172139	2.31792	0.00299142	0.408332	0.0298456	0.876981	0.141623	0.0102999	0.588743	0.12038	0.949147	0.427674
Slc25a47	Slc25a47	ENSMUSG00000048856	104910	12	solute carrier family 25, member 47 [Source:MGI Symbol;Acc:MGI:2144766]	10705	13.5257	3.57656	3.72661	-1.27402	-1.42407	2.69809	0.00952865	0.0105036	0.304182	0.323793	0.156686	0.0270143	0.043544	0.522846	0.612676	0.449236
Zdhhc18	Zdhhc18	ENSMUSG00000037553	503610	4	zinc finger, DHHC domain containing 18 [Source:MGI Symbol;Acc:MGI:3527792]	10465	9.33861	3.57453	-1.00963	-2.76698	1.81718	0.949803	0.00385501	0.374022	0.0196667	0.120756	0.55756	0.0128055	0.557118	0.0910333	0.368334	0.806828
2700081O15Rik	2700081O15Rik	ENSMUSG00000053080	108899	19	RIKEN cDNA 2700081O15 gene [Source:MGI Symbol;Acc:MGI:1919667]	7901	11.3599	3.56602	0.739989	-2.35015	0.475878	1.87428	4.73825e-09	0.183854	4.55777e-05	0.394916	0.0176593	8.93079e-08	0.346456	0.000915911	0.672766	0.127527
Gstm6	Gstm6	ENSMUSG00000068762	14867	3	glutathione S-transferase, mu 6 [Source:MGI Symbol;Acc:MGI:1309467]	7257	53.532	3.56102	0.168738	-2.43678	0.955505	1.48128	1.34002e-10	0.737485	3.75241e-06	0.061374	0.038625	3.60817e-09	0.847026	0.000116538	0.249973	0.210808
Cdca4	Cdca4	ENSMUSG00000047832	71963	12	cell division cycle associated 4 [Source:MGI Symbol;Acc:MGI:1919213]	10263	12.9143	3.55657	0.559735	-2.4041	0.592736	1.81137	0.00176905	0.591697	0.0255447	0.575318	0.223315	0.00662984	0.742815	0.109251	0.807469	0.537018
Pex14	Pex14	ENSMUSG00000028975	56273	4	peroxisomal biogenesis factor 14 [Source:MGI Symbol;Acc:MGI:1927868]	9544	17.8614	3.55495	-3.53553	-2.72834	4.36213	-1.63379	0.00168801	0.00166414	0.0121122	0.00019966	0.264131	0.00638522	0.0105708	0.0646127	0.00513572	0.580398
Nadsyn1	Nadsyn1	ENSMUSG00000031090	78914	7	NAD synthetase 1 [Source:MGI Symbol;Acc:MGI:1926164]	10217	12.0576	3.55478	-0.130113	-2.51	1.17489	1.33511	0.00171056	0.899699	0.0198675	0.266161	0.365433	0.00645118	0.946906	0.0915261	0.558586	0.674248
Mllt1	Mllt1	ENSMUSG00000024212	64144	17	myeloid/lymphoid or mixed-lineage leukemia; translocated to, 1 [Source:MGI Symbol;Acc:MGI:1927238]	10508	5.85898	3.55019	-2.79311	-2.10368	4.23961	-2.13593	0.0174526	0.0494715	0.129791	0.00574503	0.269749	0.044126	0.139856	0.310803	0.0566318	0.585099
Nlrc4	Nlrc4	ENSMUSG00000039193	268973	17	NLR family, CARD domain containing 4 [Source:MGI Symbol;Acc:MGI:3036243]	10921	3.5749	3.54992	-0.989892	-2.05329	2.48653	-0.433234	0.0117839	0.433793	0.100231	0.0807492	0.790902	0.0322297	0.612691	0.264023	0.291915	0.919262
Pnmal1	Pnmal1	ENSMUSG00000041141	71691	7	PNMA-like 1 [Source:MGI Symbol;Acc:MGI:1918941]	8921	28.4594	3.54876	0.736392	-2.42372	0.388657	2.03506	7.43875e-06	0.309969	0.00127888	0.593379	0.0482441	6.39311e-05	0.495117	0.0132018	0.817564	0.239403
Gabrg1	Gabrg1	ENSMUSG00000001260	14405	5	gamma-aminobutyric acid (GABA) A receptor, subunit gamma 1 [Source:MGI Symbol;Acc:MGI:103156]	10216	5.76817	3.54682	1.60134	-3.60457	-1.65909	5.26366	0.0277733	0.295244	0.0257077	0.278878	0.017478	0.0647925	0.479145	0.109663	0.571709	0.12662
Rce1	Rce1	ENSMUSG00000024889	19671	19	Ras converting CAAX endopeptidase 1 [Source:MGI Symbol;Acc:MGI:1336895]	8931	32.5028	3.54145	-0.197118	-2.73664	1.00193	1.73471	0.000116422	0.813433	0.00200096	0.236364	0.145027	0.000670915	0.893534	0.0184129	0.529633	0.432824
Sssca1	Sssca1	ENSMUSG00000079478	56390	19	Sjogren's syndrome/scleroderma autoantigen 1 homolog (human) [Source:MGI Symbol;Acc:MGI:1913482]	8004	68.1025	3.52831	-3.87361	-2.99611	4.40582	-1.40971	1.79461e-07	1.41431e-08	5.2968e-06	3.52394e-10	0.107242	2.36086e-06	5.48803e-07	0.000157349	5.50338e-08	0.367628
Ntmt1	Ntmt1	ENSMUSG00000026857	66617	2	N-terminal Xaa-Pro-Lys N-methyltransferase 1 [Source:MGI Symbol;Acc:MGI:1913867]	9252	36.2136	3.52686	0.42	-2.78204	0.324824	2.45721	0.00040462	0.644696	0.0038812	0.722263	0.0593097	0.00193717	0.783616	0.0296501	0.883107	0.268296
Sertad3	Sertad3	ENSMUSG00000055200	170742	7	SERTA domain containing 3 [Source:MGI Symbol;Acc:MGI:2180697]	10700	17.3973	3.52637	0.528601	-2.22203	0.775742	1.44628	0.00312156	0.63402	0.0451678	0.502379	0.367011	0.0106807	0.775118	0.159333	0.755538	0.674934
Elac2	Elac2	ENSMUSG00000020549	68626	11	elaC ribonuclease Z 2 [Source:MGI Symbol;Acc:MGI:1890496]	5590	27.0836	3.52067	-0.240456	-2.58865	1.17248	1.41617	1.48137e-14	0.563371	3.69926e-09	0.00557042	0.0166484	8.26244e-13	0.722208	3.24158e-07	0.0554606	0.122973
Rbm43	Rbm43	ENSMUSG00000036249	71684	2	RNA binding motif protein 43 [Source:MGI Symbol;Acc:MGI:1918934]	10901	7.37252	3.52052	-0.106062	-1.42336	2.20322	-0.779861	0.0162383	0.934772	0.267027	0.130188	0.666222	0.0416512	0.96598	0.481758	0.383934	0.863954
Adck4	Adck4					9014	20.1939	3.5142	-2.25995	-2.86288	2.91127	-0.0483964	0.000188702	0.0113187	0.00170896	0.00151636	0.967422	0.0010172	0.0461701	0.0164312	0.0223709	0.98817
Sec14l2	Sec14l2	ENSMUSG00000003585	67815	11	SEC14-like lipid binding 2 [Source:MGI Symbol;Acc:MGI:1915065]	5885	28.741	3.50248	0.841665	-2.61988	0.040935	2.57895	4.45214e-09	0.12408	5.01942e-06	0.940134	0.00094649	8.43515e-08	0.265502	0.000150335	0.977569	0.0172738
Hif3a	Hif3a	ENSMUSG00000004328	53417	7	hypoxia inducible factor 3, alpha subunit [Source:MGI Symbol;Acc:MGI:1859778]	10160	4.17742	3.49862	3.36568	-1.0268	-0.893862	1.92066	0.0260667	0.0322943	0.474004	0.542591	0.34946	0.061595	0.101042	0.672589	0.782844	0.661162
Kremen1	Kremen1	ENSMUSG00000020393	84035	11	kringle containing transmembrane protein 1 [Source:MGI Symbol;Acc:MGI:1933988]	8732	9.70067	3.49675	-1.9698	-2.90518	2.56137	0.343806	7.35323e-05	0.0175115	0.000707592	0.0025582	0.762647	0.00045152	0.0640596	0.00840804	0.0323684	0.909287
Mir3095	Mir3095	ENSMUSG00000093293		4	microRNA 3095 [Source:MGI Symbol;Acc:MGI:4834310]	10784	155.498	3.49454	-4.58364	-2.5421	5.53608	-2.99398	0.0262406	0.00293588	0.0815729	0.000796843	0.160956	0.0619038	0.0163917	0.232207	0.0140956	0.456104
Rps15a-ps6	Rps15a-ps6	ENSMUSG00000083022		11	ribosomal protein S15A, pseudogene 6 [Source:MGI Symbol;Acc:MGI:3650298]	10384	34.202	3.49195	2.79561	-1.58594	-0.889595	2.47553	0.00399646	0.0200813	0.155301	0.447883	0.126096	0.0132032	0.0709302	0.349474	0.715559	0.39979
C920006O11Rik	C920006O11Rik	ENSMUSG00000097574		9	RIKEN cDNA C920006O11 gene [Source:MGI Symbol;Acc:MGI:2443759]	10337	20.4154	3.49187	1.50221	-2.14519	-0.155528	2.30072	0.00244835	0.167213	0.0474176	0.886225	0.131377	0.00874399	0.325767	0.164718	0.953872	0.408479
Acaa2	Acaa2	ENSMUSG00000036880	52538	18	acetyl-Coenzyme A acyltransferase 2 (mitochondrial 3-oxoacyl-Coenzyme A thiolase) [Source:MGI Symbol;Acc:MGI:1098623]	10789	12.5515	3.48912	1.89757	-1.17256	0.418982	0.753579	0.0140235	0.158718	0.356062	0.763013	0.696371	0.0372098	0.314274	0.572843	0.901855	0.877704
Gm15455	Gm15455	ENSMUSG00000081402		1	predicted gene 15455 [Source:MGI Symbol;Acc:MGI:3705563]	9417	11.3451	3.48323	-4.02838	-2.78733	4.72428	-1.93695	0.000760517	0.000129372	0.00527263	1.509e-05	0.150509	0.00330576	0.00138793	0.0366669	0.000641881	0.440881
Kcna4	Kcna4	ENSMUSG00000042604	16492	2	potassium voltage-gated channel, shaker-related subfamily, member 4 [Source:MGI Symbol;Acc:MGI:96661]	8549	8.63283	3.48284	-5.29463	-3.45958	5.31789	-1.85831	1.37083e-05	9.50036e-10	1.5093e-05	8.54474e-10	0.0769497	0.000109147	4.80824e-08	0.00036912	1.26231e-07	0.309623
Apcdd1	Apcdd1	ENSMUSG00000071847	494504	18	adenomatosis polyposis coli down-regulated 1 [Source:MGI Symbol;Acc:MGI:3513977]	9964	12.829	3.48079	-0.67359	-2.53297	1.6214	0.911572	0.00121241	0.493425	0.0138117	0.108451	0.514039	0.00483393	0.664651	0.0707874	0.346259	0.779448
Dnm1	Dnm1	ENSMUSG00000026825	13429	2	dynamin 1 [Source:MGI Symbol;Acc:MGI:107384]	8641	12.5565	3.47912	-2.95777	-3.39324	3.04364	0.3496	0.000220522	0.00131537	0.000296142	0.000994196	0.773621	0.00116461	0.00886552	0.00421324	0.0163382	0.912786
Gmppb	Gmppb	ENSMUSG00000070284	331026	9	GDP-mannose pyrophosphorylase B [Source:MGI Symbol;Acc:MGI:2660880]	10081	18.9365	3.47364	1.13949	-2.01691	0.317243	1.69967	0.00173661	0.267625	0.0523134	0.758058	0.241008	0.00652617	0.450174	0.175605	0.900434	0.556431
Adamtsl3	Adamtsl3	ENSMUSG00000070469	269959	7	ADAMTS-like 3 [Source:MGI Symbol;Acc:MGI:3028499]	7784	7.97765	3.46715	0.285941	-2.33962	0.841592	1.49803	1.27294e-09	0.58345	1.63322e-05	0.111092	0.0433603	2.73934e-08	0.736012	0.000396561	0.350744	0.224971
Tagln2	Tagln2	ENSMUSG00000026547	21346	1	transgelin 2 [Source:MGI Symbol;Acc:MGI:1312985]	8733	36.2443	3.45964	-0.622413	-2.74161	1.34044	1.40116	2.27123e-05	0.404785	0.000520016	0.0776338	0.185849	0.000168219	0.585642	0.00654178	0.284988	0.489204
Sord	Sord	ENSMUSG00000027227	20322	2	sorbitol dehydrogenase [Source:MGI Symbol;Acc:MGI:98266]	6451	30.5347	3.45885	0.716226	-2.34443	0.398193	1.94623	6.64791e-15	0.0791249	2.83739e-08	0.330707	0.00077379	3.94972e-13	0.19388	1.84633e-06	0.619926	0.015025
Tasp1	Tasp1	ENSMUSG00000039033	75812	2	taspase, threonine aspartase 1 [Source:MGI Symbol;Acc:MGI:1923062]	7860	25.4243	3.45643	-0.0142685	-2.44091	1.02979	1.41112	5.66452e-09	0.978965	1.64349e-05	0.0610938	0.0668123	1.05135e-07	0.98914	0.000397493	0.249394	0.28654
Jade2	Jade2	ENSMUSG00000020387	76901	11	jade family PHD finger 2 [Source:MGI Symbol;Acc:MGI:1924151]	6730	9.983	3.45486	-0.899787	-2.48125	1.8734	0.607844	0.00226955	0.385352	0.0222327	0.0780662	0.676599	0.00821364	0.567133	0.0991626	0.285842	0.867951
Plbd2	Plbd2	ENSMUSG00000029598	71772	5	phospholipase B domain containing 2 [Source:MGI Symbol;Acc:MGI:1919022]	7156	16.904	3.45399	-0.558717	-2.89909	1.11362	1.78547	5.23545e-05	0.473615	0.000499134	0.157383	0.107089	0.000339265	0.647114	0.00633009	0.427031	0.367334
Fahd2a	Fahd2a	ENSMUSG00000027371	68126	2	fumarylacetoacetate hydrolase domain containing 2A [Source:MGI Symbol;Acc:MGI:1915376]	8142	44.6261	3.45053	-0.0977135	-2.36927	1.17897	1.1903	7.69426e-08	0.867426	0.000106984	0.048129	0.152596	1.09666e-06	0.928401	0.00189247	0.215545	0.443429
Mir3061	Mir3061	ENSMUSG00000092870		11	microRNA 3061 [Source:MGI Symbol;Acc:MGI:4834233]	8901	525.513	3.44718	2.3968	-2.30405	-1.25367	3.55771	0.000111463	0.00553893	0.00661701	0.13585	0.002828	0.000646767	0.0268879	0.0428537	0.394663	0.0383094
Map1lc3a	Map1lc3a	ENSMUSG00000027602	66734	2	microtubule-associated protein 1 light chain 3 alpha [Source:MGI Symbol;Acc:MGI:1915661]	7129	63.2047	3.44633	0.116349	-2.47149	0.858487	1.61301	2.19032e-08	0.83588	2.77342e-05	0.130538	0.0436303	3.57382e-07	0.908233	0.000607596	0.384543	0.225736
Pitrm1	Pitrm1	ENSMUSG00000021193	69617	13	pitrilysin metallepetidase 1 [Source:MGI Symbol;Acc:MGI:1916867]	7521	16.9718	3.44494	-0.60203	-2.57896	1.46802	1.11094	1.97636e-09	0.251656	2.96669e-06	0.00619806	0.135212	4.03088e-08	0.432453	9.59522e-05	0.0593841	0.417435
Epb4.1l5	Epb4.1l5					7543	9.22263	3.44423	0.960102	-2.09534	0.388782	1.70656	3.21768e-10	0.0573689	4.95914e-05	0.441985	0.0167348	7.94033e-09	0.155771	0.000985696	0.712126	0.12326
Tmem255a	Tmem255a	ENSMUSG00000036502	245386	X	transmembrane protein 255A [Source:MGI Symbol;Acc:MGI:3045722]	9264	24.9539	3.44309	0.455025	-2.26309	0.724974	1.53811	0.000103164	0.57497	0.00714966	0.376389	0.182368	0.000605037	0.730513	0.0451271	0.657754	0.48413
Dgcr6	Dgcr6	ENSMUSG00000003531;ENSMUSG00000111647	13353	16	DiGeorge syndrome critical region gene 6 [Source:MGI Symbol;Acc:MGI:1202877]	7086	39.4786	3.43932	1.39774	-2.12513	-0.0835547	2.20868	2.33548e-05	0.0642298	0.00573376	0.910571	0.0372916	0.00017251	0.16766	0.0388602	0.963959	0.205791
Cdk5r1	Cdk5r1	ENSMUSG00000048895	12569	11	cyclin-dependent kinase 5, regulatory subunit 1 (p35) [Source:MGI Symbol;Acc:MGI:101764]	9492	9.94032	3.43384	-1.03939	-3.17781	1.29543	1.88238	0.00246474	0.320726	0.00456496	0.21903	0.203006	0.00879103	0.505506	0.033203	0.506684	0.509942
Slitrk2	Slitrk2	ENSMUSG00000036790	245450	X	SLIT and NTRK-like family, member 2 [Source:MGI Symbol;Acc:MGI:2679449]	10518	3.3298	3.43287	2.12728	-1.7008	-0.39522	2.09602	0.00433277	0.0680725	0.125813	0.733598	0.191947	0.0140802	0.174893	0.304493	0.889101	0.496983
Zfp94	Zfp94	ENSMUSG00000074282	22756	7	zinc finger protein 94 [Source:MGI Symbol;Acc:MGI:107610]	8502	19.4025	3.42501	-0.764963	-3.19301	0.996953	2.19606	0.000537759	0.399803	0.00110684	0.274774	0.0892047	0.00246593	0.581203	0.0119211	0.568261	0.33505
Ppp2r4	Ppp2r4					6767	25.6723	3.4242	0.0362794	-2.60117	0.786754	1.81442	1.59974e-09	0.944196	1.96955e-06	0.132656	0.0140434	3.33111e-08	0.971134	6.83529e-05	0.388603	0.111409
Setmar	Setmar	ENSMUSG00000034639	74729	6	SET domain without mariner transposase fusion [Source:MGI Symbol;Acc:MGI:1921979]	9499	23.7752	3.41937	1.36279	-1.8994	0.157178	1.74222	0.000404712	0.130278	0.0360674	0.860405	0.167485	0.00193717	0.274412	0.136024	0.942372	0.465298
Acads	Acads	ENSMUSG00000029545	11409	5	acyl-Coenzyme A dehydrogenase, short chain [Source:MGI Symbol;Acc:MGI:87868]	10711	11.2603	3.41372	6.19591	-0.767859	-3.55005	4.31791	0.00837704	0.000193823	0.505731	0.0350292	0.0341417	0.0243041	0.00190546	0.696188	0.17787	0.195617
Hist3h2ba	Hist3h2ba	ENSMUSG00000056895	78303	11	histone cluster 3, H2ba [Source:MGI Symbol;Acc:MGI:1925553]	5456	167.505	3.41254	1.34671	-2.24134	-0.175511	2.41685	1.46591e-17	0.000309273	3.70652e-09	0.634869	4.21192e-06	1.38149e-15	0.00278958	3.24158e-07	0.842178	0.000242341
Dscam	Dscam	ENSMUSG00000050272	13508	16	Down syndrome cell adhesion molecule [Source:MGI Symbol;Acc:MGI:1196281]	9253	5.8276	3.40949	-0.555337	-2.61175	1.35308	1.25867	0.00070941	0.54692	0.00716306	0.149318	0.335747	0.00310957	0.70874	0.0451683	0.414269	0.6486
Ap5z1	Ap5z1	ENSMUSG00000039623	231855	5	adaptor-related protein complex 5, zeta 1 subunit [Source:MGI Symbol;Acc:MGI:1924908]	4317	23.292	3.40928	0.047437	-2.59003	0.771815	1.81821	6.13419e-16	0.901901	1.88448e-10	0.0466839	0.000917234	4.32639e-14	0.94813	2.29363e-08	0.211324	0.0168524
Mrps36	Mrps36	ENSMUSG00000061474	66128	13	mitochondrial ribosomal protein S36 [Source:MGI Symbol;Acc:MGI:1913378]	10046	47.9094	3.40738	1.3769	-1.80129	0.229193	1.57209	0.00265506	0.193248	0.0887975	0.827795	0.289187	0.00936296	0.359175	0.245755	0.927756	0.605199
2310069G16Rik	2310069G16Rik	ENSMUSG00000097102		15	RIKEN cDNA 2310069G16 gene [Source:MGI Symbol;Acc:MGI:1916909]	6795	75.8003	3.40293	1.54133	-2.04525	-0.183653	2.22891	5.69939e-09	0.00482938	0.0002086	0.732956	0.00356782	1.05603e-07	0.0243182	0.00320284	0.888728	0.0450906
Brca2	Brca2	ENSMUSG00000041147	12190	5	breast cancer 2, early onset [Source:MGI Symbol;Acc:MGI:109337]	6235	6.42592	3.4026	0.585863	-2.40266	0.414074	1.98859	9.77618e-09	0.281445	2.34061e-05	0.447166	0.0101663	1.73495e-07	0.465646	0.000533235	0.715559	0.0892181
Gm10373	Gm10373	ENSMUSG00000072592		15	predicted gene 10373 [Source:MGI Symbol;Acc:MGI:3642805]	10178	46.9371	3.40192	-1.13983	-3.06134	1.48041	1.58093	0.0102677	0.353674	0.0188593	0.233298	0.361525	0.0287223	0.537283	0.0884467	0.525749	0.671419
Kcnc3	Kcnc3	ENSMUSG00000062785	16504	7	potassium voltage gated channel, Shaw-related subfamily, member 3 [Source:MGI Symbol;Acc:MGI:96669]	10561	4.62428	3.40132	7.22388	-0.242134	-4.0647	4.30683	0.0139059	6.35073e-05	0.844894	0.019884	0.0426577	0.0370019	0.00077312	0.918312	0.124927	0.222723
Nob1	Nob1	ENSMUSG00000003848	67619	8	NIN1/RPN12 binding protein 1 homolog [Source:MGI Symbol;Acc:MGI:1914869]	7924	34.0151	3.39611	-0.695404	-2.62404	1.46747	1.15657	3.25545e-06	0.298781	0.000196583	0.0313526	0.221709	3.10546e-05	0.483391	0.00305262	0.166301	0.53451
Kri1	Kri1	ENSMUSG00000035047	215194	9	KRI1 homolog [Source:MGI Symbol;Acc:MGI:2384899]	6236	26.8739	3.39473	0.342946	-2.47632	0.575458	1.90086	3.72786e-08	0.543259	2.92701e-05	0.309991	0.0180308	5.70769e-07	0.705472	0.00063018	0.599262	0.129254
Dscr3	Dscr3	ENSMUSG00000022898	13185	16	Down syndrome critical region gene 3 [Source:MGI Symbol;Acc:MGI:1206040]	5525	31.7786	3.39277	-0.728204	-2.59174	1.52923	1.06252	3.85001e-17	0.0490657	2.58069e-11	5.13625e-05	0.042106	3.31404e-15	0.138996	4.0887e-09	0.00174377	0.221193
Cep131	Cep131	ENSMUSG00000039781	12009	11	centrosomal protein 131 [Source:MGI Symbol;Acc:MGI:107440]	8823	13.5831	3.39068	2.62967	-1.63702	-0.876012	2.51303	1.79454e-05	0.000663001	0.0261166	0.238172	0.016091	0.000138978	0.00516971	0.110533	0.531801	0.120401
Ephb6	Ephb6	ENSMUSG00000029869	13848	6	Eph receptor B6 [Source:MGI Symbol;Acc:MGI:1096338]	8273	8.7758	3.38697	-6.42765	-3.09424	6.72037	-3.62613	0.000118138	1.03019e-10	0.000344977	2.91657e-11	0.00215	0.000680089	6.50984e-09	0.00475787	6.13153e-09	0.031255
Thap11	Thap11	ENSMUSG00000036442	59016	8	THAP domain containing 11 [Source:MGI Symbol;Acc:MGI:1930964]	10193	16.9849	3.3772	-0.639223	-2.11037	1.90605	0.204322	0.00432362	0.555158	0.0589505	0.0902496	0.896382	0.0140588	0.715656	0.190116	0.312118	0.961088
Adcyap1r1	Adcyap1r1	ENSMUSG00000029778	11517	6	adenylate cyclase activating polypeptide 1 receptor 1 [Source:MGI Symbol;Acc:MGI:108449]	10815	2.78292	3.37152	-0.825869	-1.55297	2.64442	-1.09145	0.0211425	0.530885	0.242007	0.0658656	0.55941	0.0517184	0.696129	0.454602	0.259756	0.808014
Spef2	Spef2	ENSMUSG00000072663	320277	15	sperm flagellar 2 [Source:MGI Symbol;Acc:MGI:2443727]	8567	17.1745	3.37115	3.4676	-1.66158	-1.75803	3.41961	3.49215e-05	2.85629e-05	0.0288258	0.0250843	0.00174895	0.000239349	0.000406574	0.117763	0.145398	0.0270432
Ufc1	Ufc1	ENSMUSG00000062963	66155	1	ubiquitin-fold modifier conjugating enzyme 1 [Source:MGI Symbol;Acc:MGI:1913405]	7214	63.4794	3.36111	-0.320167	-2.64798	1.03329	1.61469	1.59433e-05	0.653294	0.000450268	0.151663	0.111187	0.000124762	0.790522	0.005846	0.41826	0.373765
Tube1	Tube1	ENSMUSG00000019845	71924	10	epsilon-tubulin 1 [Source:MGI Symbol;Acc:MGI:1919174]	9813	12.8402	3.3607	1.83632	-1.71546	-0.191079	1.90654	0.00154582	0.0681999	0.0834894	0.84675	0.171442	0.00592527	0.175088	0.235775	0.937703	0.470278
Nbeal2	Nbeal2	ENSMUSG00000056724	235627	9	neurobeachin-like 2 [Source:MGI Symbol;Acc:MGI:2448554]	9013	5.28816	3.35839	-0.282076	-3.03123	0.609238	2.42199	0.00199015	0.777086	0.00461417	0.542524	0.0895872	0.00732783	0.870132	0.0334719	0.782844	0.335411
Spaca6	Spaca6	ENSMUSG00000080316	75202	17	sperm acrosome associated 6 [Source:MGI Symbol;Acc:MGI:1922452]	10743	19.3679	3.35742	0.313067	-1.88423	1.16012	0.724103	0.00732724	0.786413	0.103564	0.338329	0.669682	0.0217018	0.876711	0.269884	0.627306	0.865796
Plau	Plau	ENSMUSG00000021822	18792	14	plasminogen activator, urokinase [Source:MGI Symbol;Acc:MGI:97611]	9541	17.226	3.34867	-0.627827	-3.05187	0.924632	2.12724	0.00424903	0.560463	0.00824163	0.394003	0.166033	0.0138865	0.720482	0.0497501	0.672425	0.463666
Rsl1	Rsl1	ENSMUSG00000058900	380855	13	regulator of sex limited protein 1 [Source:MGI Symbol;Acc:MGI:3044162]	9471	12.8123	3.34761	-5.55569	-2.63365	6.26965	-3.636	0.00570718	2.5369e-05	0.0238827	4.7376e-06	0.0249043	0.0177803	0.000367329	0.104476	0.000256393	0.159679
Slc38a3	Slc38a3	ENSMUSG00000010064	76257	9	solute carrier family 38, member 3 [Source:MGI Symbol;Acc:MGI:1923507]	9246	17.796	3.34388	-0.332788	-2.81408	0.862592	1.95149	0.00217623	0.739554	0.00823438	0.392741	0.171592	0.00791961	0.84811	0.0497338	0.671061	0.470491
Tmem143	Tmem143	ENSMUSG00000002781	70209	7	transmembrane protein 143 [Source:MGI Symbol;Acc:MGI:1917459]	10556	11.6798	3.3416	2.54829	-1.75242	-0.959112	2.71154	0.00445421	0.0304957	0.108073	0.412438	0.0900225	0.0144149	0.0968562	0.277337	0.6877	0.33569
Wdr31	Wdr31	ENSMUSG00000028391	71354	4	WD repeat domain 31 [Source:MGI Symbol;Acc:MGI:1918604]	9453	16.2644	3.33995	-0.283309	-2.87654	0.746722	2.12981	0.00249854	0.780083	0.00781196	0.464826	0.141658	0.00888549	0.872774	0.047897	0.726549	0.427674
Adam15	Adam15	ENSMUSG00000028041	11490	3	a disintegrin and metallopeptidase domain 15 (metargidin) [Source:MGI Symbol;Acc:MGI:1333882]	5955	25.7668	3.33639	-0.00953159	-2.46344	0.882478	1.58096	7.53387e-13	0.982171	3.74645e-08	0.0407661	0.00919254	2.99492e-11	0.990994	2.38117e-06	0.195768	0.0843061
Tmprss5	Tmprss5	ENSMUSG00000032268	80893	9	transmembrane protease, serine 5 (spinesin) [Source:MGI Symbol;Acc:MGI:1933407]	8111	27.2541	3.33469	0.735583	-2.24267	0.356436	1.88624	7.27834e-08	0.198733	0.00014507	0.534579	0.0201373	1.04353e-06	0.366676	0.00240653	0.777504	0.138957
Hbegf	Hbegf	ENSMUSG00000024486	15200	18	heparin-binding EGF-like growth factor [Source:MGI Symbol;Acc:MGI:96070]	7984	22.7895	3.33435	4.01614	-1.11434	-1.79613	2.91046	0.000116361	8.02084e-06	0.162575	0.0304192	0.011407	0.000670915	0.000141198	0.358827	0.164138	0.0968717
Gap43	Gap43	ENSMUSG00000047261	14432	16	growth associated protein 43 [Source:MGI Symbol;Acc:MGI:95639]	10922	10.5265	3.33208	-0.0669372	-1.51698	1.88204	-0.365054	0.0198115	0.958572	0.226794	0.194931	0.823362	0.0490135	0.979241	0.438428	0.477051	0.934504
Tesk1	Tesk1	ENSMUSG00000028458	21754	4	testis specific protein kinase 1 [Source:MGI Symbol;Acc:MGI:1201675]	8886	13.2669	3.32735	1.39355	-2.14657	-0.212771	2.35934	0.000121874	0.0859242	0.00911934	0.790792	0.0385743	0.000698286	0.205159	0.0530353	0.912106	0.210643
Tmem200c	Tmem200c	ENSMUSG00000095407	622645	17	transmembrane protein 200C [Source:MGI Symbol;Acc:MGI:3646281]	10803	5.21946	3.32546	-1.02	-1.53195	2.81351	-1.28156	0.0323067	0.469201	0.280301	0.0662484	0.520991	0.0733797	0.643822	0.496236	0.260607	0.783422
Blcap	Blcap	ENSMUSG00000067787	53619	2	bladder cancer associated protein [Source:MGI Symbol;Acc:MGI:1858907]	6190	32.5666	3.32374	-1.11607	-3.04132	1.39848	1.64284	0.000350683	0.194806	0.000924209	0.106686	0.174906	0.00171605	0.361136	0.0103096	0.342849	0.475346
Zfp433	Zfp433	ENSMUSG00000096795	73610	10	zinc finger protein 433 [Source:MGI Symbol;Acc:MGI:1920860]	9392	17.4422	3.32135	-0.281553	-2.91988	0.683016	2.23687	0.0042845	0.792143	0.0105359	0.524889	0.143071	0.0139649	0.880051	0.0584364	0.771559	0.42936
Ppfia3	Ppfia3	ENSMUSG00000003863	76787	7	protein tyrosine phosphatase, receptor type, f polypeptide (PTPRF), interacting protein (liprin), alpha 3 [Source:MGI Symbol;Acc:MGI:1924037]	10638	4.63805	3.31106	1.24489	-0.304406	1.76176	-1.45735	0.0345561	0.386702	0.828896	0.23993	0.472224	0.0773954	0.56805	0.909514	0.533313	0.752435
Pcdhb21	Pcdhb21	ENSMUSG00000044022	93892	18	protocadherin beta 21 [Source:MGI Symbol;Acc:MGI:2136759]	10626	8.73772	3.30519	1.80836	-1.8861	-0.389274	2.27538	0.00557058	0.11958	0.0898287	0.739867	0.158882	0.0174242	0.258043	0.247302	0.892013	0.452436
Josd1	Josd1	ENSMUSG00000022426	74158;100043771	15	Josephin domain containing 1 [Source:MGI Symbol;Acc:MGI:1921408]	5808	21.7788	3.30469	-0.580895	-2.65756	1.22803	1.42953	1.49005e-09	0.247851	5.63436e-07	0.01589	0.0447693	3.13859e-08	0.427839	2.28129e-05	0.107694	0.229343
Tmem97	Tmem97	ENSMUSG00000037278	69071	11	transmembrane protein 97 [Source:MGI Symbol;Acc:MGI:1916321]	7725	44.2268	3.3018	-0.276647	-2.40464	1.1738	1.23084	8.6323e-09	0.599591	1.28072e-05	0.0285441	0.100012	1.54449e-07	0.749026	0.000324845	0.157368	0.355208
Csk	Csk	ENSMUSG00000032312	12988	9	c-src tyrosine kinase [Source:MGI Symbol;Acc:MGI:88537]	6430	30.3994	3.30073	-0.529081	-2.31615	1.51366	0.802488	2.13439e-15	0.1666	5.96667e-09	0.000112037	0.138405	1.38888e-13	0.324997	4.83167e-07	0.00320625	0.422047
Zbed3	Zbed3	ENSMUSG00000041995	72114	13	zinc finger, BED type containing 3 [Source:MGI Symbol;Acc:MGI:1919364]	8253	27.9988	3.29991	0.04134	-2.4001	0.858473	1.54163	0.000154193	0.958771	0.00421077	0.28779	0.175538	0.000856089	0.979241	0.0312931	0.581215	0.475711
9330162012Rik	9330162012Rik	ENSMUSG00000086448		13	cDNA RIKEN 9330162012 gene [Source:MGI Symbol;Acc:MGI:3604449]	10028	23.7718	3.29312	0.16674	-2.1089	1.01748	1.09142	0.00239649	0.867182	0.0404353	0.316286	0.44223	0.00859528	0.928322	0.14774	0.605239	0.733888
Lynx1	Lynx1	ENSMUSG00000022594	23936	15	Ly6/neurotoxin 1 [Source:MGI Symbol;Acc:MGI:1345180]	10750	5.18299	3.28846	1.74295	-1.3133	0.232206	1.08109	0.012664	0.167264	0.274036	0.857441	0.544222	0.0342936	0.325767	0.489024	0.941468	0.797191
Dtx3l	Dtx3l	ENSMUSG00000049502	209200	16	deltex 3-like, E3 ubiquitin ligase [Source:MGI Symbol;Acc:MGI:2656973]	10643	4.3771	3.2882	-2.61749	-2.86036	3.04533	-0.184965	0.00802953	0.0292354	0.0179548	0.0134186	0.907316	0.0234327	0.0938347	0.0854513	0.0970187	0.96552
Irf1	Irf1	ENSMUSG00000018899	16362	11	interferon regulatory factor 1 [Source:MGI Symbol;Acc:MGI:96590]	10260	9.55854	3.28776	-5.74625	-2.74315	6.29087	-3.54772	0.0166509	0.000109998	0.0385183	4.14327e-05	0.057076	0.0424579	0.00120612	0.142816	0.00149981	0.262664
H2-K2	H2-K2	ENSMUSG00000067203		17	histocompatibility 2, K region locus 2 [Source:MGI Symbol;Acc:MGI:95906]	9104	34.2142	3.28603	-1.15679	-2.64056	1.80226	0.838292	0.000463378	0.184529	0.00376953	0.0426701	0.492989	0.00217971	0.347146	0.0291226	0.200456	0.765633
Mettl13	Mettl13	ENSMUSG00000026694	71449	1	methyltransferase like 13 [Source:MGI Symbol;Acc:MGI:1918699]	10154	11.2452	3.28021	-2.48359	-2.84489	2.9189	-0.0740065	0.00493874	0.0275551	0.012723	0.0112002	0.960114	0.0157486	0.0898899	0.0666766	0.0859619	0.985363
Apold1	Apold1	ENSMUSG00000090698	381823	6	apolipoprotein L domain containing 1 [Source:MGI Symbol;Acc:MGI:2685921]	10582	6.45812	3.27086	-2.6333	-2.10671	3.79745	-1.69073	0.0194922	0.049494	0.110028	0.00781127	0.35604	0.0484404	0.139868	0.280575	0.0676549	0.666364
Dnase1l2	Dnase1l2	ENSMUSG00000024136	66705	17	deoxyribonuclease 1-like 2 [Source:MGI Symbol;Acc:MGI:1913955]	10759	16.89	3.27075	0.60256	-2.33413	0.33406	2.00007	0.00666395	0.601252	0.0411131	0.7783	0.224162	0.020169	0.750186	0.149318	0.907458	0.537939
Ezr	Ezr	ENSMUSG00000052397	22350	17	ezrin [Source:MGI Symbol;Acc:MGI:98931]	9912	11.8948	3.26733	-1.1083	-2.23936	2.13627	0.103085	0.00285258	0.27494	0.032271	0.0420906	0.943779	0.00990923	0.458589	0.126902	0.199365	0.98123
Xkrx	Xkrx	ENSMUSG00000031258	331524	X	X-linked Kx blood group related, X-linked [Source:MGI Symbol;Acc:MGI:3584011]	9561	14.2689	3.26015	-1.83739	-2.51619	2.58135	-0.0651605	0.00244101	0.0707297	0.0155614	0.013707	0.962011	0.0087292	0.179613	0.0768719	0.0978103	0.985793
Cntn3	Cntn3	ENSMUSG00000030075	18488	6	contactin 3 [Source:MGI Symbol;Acc:MGI:99534]	963	25.3838	3.2556	-1.13117	0.137524	4.5243	-4.66182	0.00866304	0.325622	0.903708	0.000584856	0.00574301	0.0249814	0.510351	0.951929	0.0111973	0.0616725
Tmub2	Tmub2	ENSMUSG00000034757	72053	11	transmembrane and ubiquitin-like domain containing 2 [Source:MGI Symbol;Acc:MGI:1919303]	5252	37.5226	3.25343	0.10704	-2.67849	0.467907	2.21058	6.46317e-07	0.858536	2.65331e-05	0.437304	0.0100614	7.4531e-06	0.923135	0.000590753	0.708134	0.0886094
D030028A08Rik	D030028A08Rik	ENSMUSG00000078700		11	RIKEN cDNA D030028A08 gene [Source:MGI Symbol;Acc:MGI:2441931]	10173	7.37549	3.25269	-4.85838	-1.92762	6.18345	-4.25584	0.027154	0.00161323	0.160813	0.000188081	0.0320931	0.0636193	0.0103479	0.356883	0.00490717	0.187522
Trp53i13	Trp53i13	ENSMUSG00000044328	216964	11	transformation related protein 53 inducible protein 13 [Source:MGI Symbol;Acc:MGI:1915125]	10140	22.303	3.25248	1.21279	-0.97095	1.06874	-0.0977933	0.0284154	0.379181	0.47754	0.440819	0.958116	0.0659528	0.561681	0.674698	0.711191	0.984751
Ccdc136	Ccdc136	ENSMUSG00000029769	232664	6	coiled-coil domain containing 136 [Source:MGI Symbol;Acc:MGI:1918128]	9237	12.9517	3.24551	0.829962	-2.21014	0.205415	2.00472	0.0124668	0.490031	0.0755461	0.863845	0.239927	0.0338517	0.661932	0.221829	0.943991	0.554878
Dpyd	Dpyd	ENSMUSG00000033308	99586	3	dihydropyrimidine dehydrogenase [Source:MGI Symbol;Acc:MGI:2139667]	8771	7.36119	3.24522	-5.33278	-2.43091	6.14709	-3.71618	0.00276968	6.24042e-06	0.019672	5.89054e-07	0.0106587	0.0096797	0.000115009	0.0910333	4.35104e-05	0.0921117
Slc35b3	Slc35b3	ENSMUSG00000021432	108652	13	solute carrier family 35, member B3 [Source:MGI Symbol;Acc:MGI:1913978]	7719	28.6553	3.24308	1.27545	-1.98015	-0.0125211	1.99267	6.953e-08	0.0236471	0.000516691	0.982125	0.011853	1.00543e-06	0.080359	0.00651495	0.992841	0.0988381
4732471J01Rik	4732471J01Rik	ENSMUSG00000053714		7	RIKEN cDNA 4732471J01 gene [Source:MGI Symbol;Acc:MGI:3603586]	9479	41.8464	3.24106	-0.237456	-3.00516	0.473359	2.5318	0.00581354	0.826675	0.00972914	0.663339	0.103386	0.0180601	0.902121	0.0555399	0.855396	0.36137
Samd1	Samd1	ENSMUSG00000079003	666704	8	sterile alpha motif domain containing 1 [Source:MGI Symbol;Acc:MGI:2142433]	8466	25.2048	3.24106	0.547387	-2.14025	0.55342	1.58683	2.88242e-05	0.444231	0.00379749	0.441395	0.118112	0.000203689	0.621718	0.0292559	0.711701	0.386123
Commd5	Commd5	ENSMUSG00000055041	66398	15	COMM domain containing 5 [Source:MGI Symbol;Acc:MGI:1913648]	8528	52.8412	3.24066	0.981618	-2.23637	0.02267	2.2137	1.40641e-05	0.158077	0.00174905	0.973892	0.0245603	0.000111574	0.313288	0.0166992	0.990841	0.158217
Pcsk2os1	Pcsk2os1	ENSMUSG00000086171		2	proprotein convertase subtilisin/kexin type 2, opposite strand 1 [Source:MGI Symbol;Acc:MGI:3605632]	9601	9.66615	3.23878	-0.674528	-2.57748	1.33582	1.24166	0.00108456	0.46179	0.0073644	0.151542	0.338886	0.00442704	0.637893	0.046057	0.41803	0.652524
Ninl	Ninl	ENSMUSG00000068115	78177	2	ninein-like [Source:MGI Symbol;Acc:MGI:1925427]	9893	7.25205	3.23577	0.8445	-2.24449	0.146786	2.0977	0.0028371	0.40298	0.0305529	0.88447	0.143084	0.00987116	0.583854	0.122553	0.953076	0.42936
Zfp119b	Zfp119b	ENSMUSG00000062101	240120	17	zinc finger protein 119b [Source:MGI Symbol;Acc:MGI:2385323]	8871	26.0145	3.22966	0.615509	-2.27734	0.336809	1.94053	3.34257e-05	0.393555	0.00229103	0.641535	0.0583547	0.00023098	0.574872	0.0203561	0.845888	0.265917
Hykk	Hykk	ENSMUSG00000035878	235386	9	hydroxylysine kinase 1 [Source:MGI Symbol;Acc:MGI:2443139]	10836	3.66382	3.2269	-0.792187	-1.92729	2.0918	-0.164517	0.0140182	0.511456	0.112681	0.105528	0.91329	0.0372049	0.680033	0.284947	0.341217	0.967793
Snord100	Snord100	ENSMUSG00000080486		10	small nucleolar RNA, C/D box 100 [Source:MGI Symbol;Acc:MGI:3819514]	10543	316.6	3.22666	0.492682	-0.453686	2.28029	-1.8266	0.0580521	0.751226	0.769691	0.166075	0.410344	0.118092	0.854158	0.875973	0.439026	0.709471
Ppp1r3e	Ppp1r3e	ENSMUSG00000072494	105651	14	protein phosphatase 1, regulatory (inhibitor) subunit 3E [Source:MGI Symbol;Acc:MGI:2145790]	9968	16.7364	3.22425	-3.66736	-2.75156	4.14004	-1.38847	0.00326802	0.000951498	0.0101223	0.000275886	0.335203	0.0111054	0.00685229	0.0570102	0.006486	0.648229
Ttf2	Ttf2	ENSMUSG00000033222	74044	3	transcription termination factor, RNA polymerase II [Source:MGI Symbol;Acc:MGI:1921294]	10502	4.94696	3.21982	-4.51993	-3.20763	4.53212	-1.32449	0.00966194	0.000514097	0.00976932	0.000508994	0.431209	0.0273072	0.00421298	0.0557019	0.0102098	0.726234
Dusp18	Dusp18	ENSMUSG00000047205	75219	11	dual specificity phosphatase 18 [Source:MGI Symbol;Acc:MGI:1922469]	10614	5.0857	3.21499	2.76102	-1.12513	-0.671153	1.79628	0.0117136	0.0307051	0.335256	0.594067	0.296416	0.0320714	0.0974081	0.553712	0.817721	0.610912
Alkbh2	Alkbh2	ENSMUSG00000044339	231642	5	alkB homolog 2, alpha-ketoglutarate-dependent dioxygenase [Source:MGI Symbol;Acc:MGI:2141032]	9889	29.5557	3.21466	1.58698	-1.83008	-0.202405	2.03248	0.0603824	0.325473	0.258517	0.898191	0.367	0.12188	0.51019	0.473062	0.958378	0.674934
Map3k1	Map3k1	ENSMUSG00000021754	26401	13	mitogen-activated protein kinase kinase kinase 1 [Source:MGI Symbol;Acc:MGI:1346872]	10754	2.90555	3.20953	3.11738	-0.950525	-0.858378	1.8089	0.0128818	0.0190444	0.414801	0.520357	0.308587	0.03478	0.0681968	0.623827	0.768755	0.621609
Mn1	Mn1	ENSMUSG00000070576	433938	5	meningioma 1 [Source:MGI Symbol;Acc:MGI:1261813]	9755	5.87386	3.20787	-0.867158	-2.13696	1.93807	0.198887	0.0163748	0.483142	0.0942732	0.12833	0.909943	0.041952	0.654922	0.255188	0.380831	0.966433
Gm13152	Gm13152					9831	30.8844	3.2068	0.578326	-2.39026	0.238221	2.15203	0.00354592	0.57119	0.024223	0.816003	0.138973	0.0119274	0.727597	0.105458	0.924276	0.423073
Elfn2	Elfn2	ENSMUSG00000043460	207393	15	leucine rich repeat and fibronectin type III, extracellular 2 [Source:MGI Symbol;Acc:MGI:3608416]	7479	12.6215	3.20075	1.93123	-2.01531	-0.745791	2.7611	1.4538e-08	0.000370017	0.000176627	0.160299	0.000245081	2.46021e-07	0.00323085	0.00279434	0.430986	0.00656672
Uck1	Uck1	ENSMUSG00000002550	22245	2	uridine-cytidine kinase 1 [Source:MGI Symbol;Acc:MGI:98904]	9866	18.9346	3.19546	2.15037	-1.42827	-0.383179	1.81145	0.00402482	0.0448867	0.168306	0.713194	0.217109	0.0132888	0.130434	0.366367	0.879089	0.529689
Foxred2	Foxred2	ENSMUSG00000016552	239554	15	FAD-dependent oxidoreductase domain containing 2 [Source:MGI Symbol;Acc:MGI:106315]	10510	5.37469	3.18914	2.235	-1.48313	-0.52899	2.01212	0.0079146	0.0577818	0.183602	0.649868	0.212302	0.0231405	0.156509	0.386655	0.849724	0.523076
Mtss1l	Mtss1l	ENSMUSG00000033763	244654	8	metastasis suppressor 1-like [Source:MGI Symbol;Acc:MGI:3039591]	6493	14.4396	3.1815	0.497313	-2.16274	0.521444	1.6413	1.28344e-06	0.412627	0.000593937	0.391614	0.0568995	1.37825e-05	0.592752	0.00729541	0.669973	0.262664
Pex10	Pex10	ENSMUSG00000029047	668173	4	peroxisomal biogenesis factor 10 [Source:MGI Symbol;Acc:MGI:2684988]	9225	20.0382	3.18103	-4.55386	-2.53927	5.19562	-2.65635	0.00284331	5.18931e-05	0.0139952	8.00128e-06	0.060554	0.00988334	0.000661954	0.07136	0.000388755	0.271335
Nat14	Nat14	ENSMUSG00000035285	269854	7	N-acetyltransferase 14 [Source:MGI Symbol;Acc:MGI:3039561]	10824	11.5324	3.17482	2.01801	-1.24459	-0.0877788	1.33237	0.0136187	0.110536	0.286003	0.946524	0.452256	0.0363497	0.244862	0.502866	0.98018	0.739473
Ncapd2	Ncapd2	ENSMUSG00000038252	68298	6	non-SMC condensin I complex, subunit D2 [Source:MGI Symbol;Acc:MGI:1915548]	8047	12.309	3.16716	-0.513996	-2.41835	1.26281	1.15554	1.42574e-05	0.446231	0.000617759	0.0653376	0.22673	0.000112943	0.623412	0.00752881	0.259075	0.5413
3300002I08Rik	3300002I08Rik	ENSMUSG00000063364	69277	2	RIKEN cDNA 3300002I08 gene [Source:MGI Symbol;Acc:MGI:1916527]	9591	63.2247	3.15824	-1.18394	-2.72905	1.61312	1.11593	0.00193157	0.214269	0.00628496	0.094898	0.404096	0.00714342	0.386482	0.0412639	0.320985	0.704221
Pde4d	Pde4d	ENSMUSG00000021699	238871	13	phosphodiesterase 4D, cAMP specific [Source:MGI Symbol;Acc:MGI:99555]	7803	8.39838	3.15058	0.181207	-2.10901	0.860368	1.24864	8.65038e-08	0.739062	0.00017966	0.118102	0.106078	1.21863e-06	0.847877	0.00283412	0.36287	0.365791
Dand5	Dand5	ENSMUSG00000053226	23863	8	DAN domain family member 5, BMP antagonist [Source:MGI Symbol;Acc:MGI:1344365]	9289	31.958	3.14741	-3.16863	-2.55104	3.765	-1.21396	0.000680517	0.000597619	0.00462971	7.50722e-05	0.31791	0.00300582	0.00474449	0.0335623	0.00237144	0.631613
Plet1os	Plet1os	ENSMUSG00000101304		9	placenta expressed transcript 1, opposite strand [Source:MGI Symbol;Acc:MGI:1916881]	10549	22.2999	3.14731	6.16262	-1.07094	-4.08625	5.15719	0.00969339	7.82462e-05	0.338236	0.00774213	0.00668135	0.0273678	0.000913875	0.556363	0.067516	0.0682622
Isoc2a	Isoc2a	ENSMUSG00000086784	664994	7	isochorismatase domain containing 2a [Source:MGI Symbol;Acc:MGI:3609243]	10698	19.1287	3.14286	6.50133	-0.408347	-3.76681	4.17516	0.016177	0.000139934	0.728349	0.0274597	0.0432237	0.0415134	0.0014766	0.849675	0.153707	0.224582
Lsamp	Lsamp	ENSMUSG00000061080	268890	16	limbic system-associated membrane protein [Source:MGI Symbol;Acc:MGI:1261760]	8441	20.9438	3.14259	0.212057	-2.50591	0.424616	2.0813	0.00077465	0.806209	0.00586248	0.624391	0.0917205	0.0033512	0.889232	0.0394391	0.836532	0.339895
Psmd5	Psmd5	ENSMUSG00000026869	66998	2	proteasome (prosome, macropain) 26S subunit, non-ATPase, 5 [Source:MGI Symbol;Acc:MGI:1914248]	5061	40.1261	3.1371	0.286118	-2.21201	0.638974	1.57303	6.57564e-17	0.410411	8.90851e-10	0.0679633	0.00145121	5.44583e-15	0.590703	9.18753e-08	0.264079	0.0235032
4930526I15Rik	4930526I15Rik					9425	29.5393	3.13353	-3.41152	-2.39807	4.14698	-1.74891	0.00217419	0.000909998	0.0152144	0.000102328	0.193903	0.00791485	0.00659251	0.0756496	0.00299105	0.50006
Arhgap29	Arhgap29	ENSMUSG00000039831	214137	3	Rho GTPase activating protein 29 [Source:MGI Symbol;Acc:MGI:2443818]	7236	12.442	3.13292	0.596447	-1.90489	0.631587	1.2733	9.28819e-10	0.209307	8.97722e-05	0.186647	0.0583483	2.05544e-08	0.38009	0.00162799	0.467987	0.265917
E130311K13Rik	E130311K13Rik	ENSMUSG00000048581	329659	3	RIKEN cDNA E130311K13 gene [Source:MGI Symbol;Acc:MGI:3607716]	10226	20.2298	3.13139	6.9151	-0.648514	-4.43222	5.08073	0.00751031	4.37835e-06	0.546275	0.00192587	0.00440889	0.0221122	8.54716e-05	0.728001	0.0266501	0.0514387
Apba3	Apba3	ENSMUSG00000004931	57267	10	amyloid beta (A4) precursor protein-binding, family A, member 3 [Source:MGI Symbol;Acc:MGI:1888527]	10704	9.96779	3.13111	1.7926	-0.946562	0.39195	0.554612	0.0217537	0.168956	0.446908	0.76673	0.763734	0.0530237	0.327993	0.65156	0.903472	0.909987
Mcrs1	Mcrs1	ENSMUSG00000037570	51812	15	microspherule protein 1 [Source:MGI Symbol;Acc:MGI:1858420]	7592	33.5119	3.13064	-1.31109	-2.48176	1.95997	0.521783	5.6482e-08	0.0153466	9.39818e-06	0.00038993	0.489557	8.33282e-07	0.0581925	0.000249978	0.00831208	0.764027
Lins	Lins					9804	7.29572	3.13049	1.41028	-1.61523	0.104984	1.51025	0.00294304	0.156036	0.102991	0.915126	0.277059	0.0101557	0.310839	0.268723	0.966025	0.593106
B930003M22Rik	B930003M22Rik					7494	50.1636	3.13036	1.84423	-1.75299	-0.466848	2.21983	6.33672e-09	0.00035888	0.000583662	0.356578	0.00192869	1.16425e-07	0.00315629	0.00719346	0.641137	0.0288828
Parp3	Parp3	ENSMUSG00000023249	235587	9	poly (ADP-ribose) polymerase family, member 3 [Source:MGI Symbol;Acc:MGI:1891258]	8932	18.3074	3.12672	0.896286	-2.40132	-0.170883	2.5722	0.00055738	0.29008	0.00623507	0.839496	0.0328514	0.00254417	0.474227	0.0410366	0.933052	0.190824
Gdpgp1	Gdpgp1	ENSMUSG00000050973	269952	7	GDP-D-glucose phosphorylase 1 [Source:MGI Symbol;Acc:MGI:2443429]	8996	12.7811	3.12027	-3.06124	-2.94323	3.23829	-0.295063	0.000241078	0.000299527	0.000477335	0.000149626	0.791029	0.00125081	0.00271287	0.00611749	0.00408929	0.919262
Glce	Glce	ENSMUSG00000032252	93683	9	glucuronyl C5-epimerase [Source:MGI Symbol;Acc:MGI:2136405]	7182	13.7983	3.11968	1.04273	-2.05188	0.0250741	2.0268	8.52139e-10	0.0288338	2.43326e-05	0.957906	0.00261435	1.91679e-08	0.0929003	0.000551875	0.984657	0.0359951
Hist1h2bg	Hist1h2bg	ENSMUSG00000058385	319181	13	histone cluster 1, H2bg [Source:MGI Symbol;Acc:MGI:2448386]	9915	78.1709	3.11416	0.479008	-1.90041	0.734736	1.16568	0.00608461	0.649209	0.0782523	0.489515	0.43556	0.0187213	0.786998	0.227031	0.745837	0.72973
Polr1b	Polr1b	ENSMUSG00000027395	20017	2	polymerase (RNA) I polypeptide B [Source:MGI Symbol;Acc:MGI:108014]	9833	9.57584	3.09899	1.23012	-1.92772	-0.0588495	1.98657	0.00216213	0.1973	0.04505	0.950535	0.138768	0.00787882	0.364523	0.159072	0.982346	0.422698
Nudt21	Nudt21	ENSMUSG00000031754	68219	8	nudix (nucleoside diphosphate linked moiety X)-type motif 21 [Source:MGI Symbol;Acc:MGI:1915469]	10252	20.8077	3.0989	-5.75388	-3.21051	5.64227	-2.43177	0.0108122	1.83421e-05	0.00862272	2.39277e-05	0.145707	0.0300074	0.00028012	0.0510914	0.000947746	0.434142
Zfp286	Zfp286	ENSMUSG00000047342	192651	11	zinc finger protein 286 [Source:MGI Symbol;Acc:MGI:2384758]	9500	11.6945	3.09599	-4.35088	-2.62991	4.81696	-2.18706	0.00285687	6.51653e-05	0.00951615	1.61097e-05	0.112647	0.00991471	0.000790725	0.0547794	0.000672178	0.376515
Ppard	Ppard	ENSMUSG00000002250	19015	17	peroxisome proliferator activator receptor delta [Source:MGI Symbol;Acc:MGI:101884]	8210	17.1113	3.09296	0.612765	-2.01931	0.460877	1.55844	5.31615e-06	0.332404	0.00188506	0.467486	0.0820065	4.76752e-05	0.517836	0.0175982	0.728207	0.319732
4930481A15Rik	4930481A15Rik	ENSMUSG00000086938		19	RIKEN cDNA 4930481A15 gene [Source:MGI Symbol;Acc:MGI:1922181]	10436	13.1539	3.08842	1.84985	-1.56939	-0.330813	1.9002	0.00913355	0.106634	0.157658	0.771033	0.231251	0.02607	0.239122	0.352458	0.904877	0.544835
Txnrd2	Txnrd2	ENSMUSG00000075704;ENSMUSG00000099282	26462	16	thioredoxin reductase 2 [Source:MGI Symbol;Acc:MGI:1347023]	10042	18.7071	3.08657	-0.265727	-2.34837	1.00393	1.34444	0.00744252	0.804004	0.035374	0.35499	0.37749	0.0219422	0.888051	0.134147	0.6403	0.683119
Ahcy	Ahcy	ENSMUSG00000027597	269378	2	S-adenosylhomocysteine hydrolase [Source:MGI Symbol;Acc:MGI:87968]	9694	13.2498	3.08456	-3.83787	-2.72191	4.20052	-1.4786	0.00524313	0.000734856	0.0121569	0.000287981	0.310918	0.0165563	0.00560705	0.0647972	0.00668409	0.624463
Fam173a	Fam173a	ENSMUSG00000057411	214917	17	family with sequence similarity 173, member A [Source:MGI Symbol;Acc:MGI:2384888]	8074	60.2795	3.08139	0.40777	-2.52705	0.146568	2.38048	0.000307724	0.607176	0.00243742	0.853437	0.0357928	0.00153609	0.754535	0.0212318	0.940027	0.201694
B3galnt2	B3galnt2	ENSMUSG00000039242	97884	13	UDP-GalNAc:betaGlcNAc beta 1,3-galactosaminyltransferase, polypeptide 2 [Source:MGI Symbol;Acc:MGI:2145517]	8634	13.9352	3.07932	0.281924	-2.30992	0.487479	1.82244	0.000139647	0.70721	0.00314995	0.518031	0.0881657	0.000787732	0.82785	0.0254135	0.766976	0.333522
Snx8	Snx8	ENSMUSG00000029560	231834	5	sorting nexin 8 [Source:MGI Symbol;Acc:MGI:2443816]	9168	17.4032	3.06532	-0.695071	-2.5392	1.2212	1.318	0.00154926	0.440866	0.00729017	0.180721	0.301657	0.0059364	0.618551	0.0458024	0.459559	0.615935
Zfp112	Zfp112	ENSMUSG00000052675	57745	7	zinc finger protein 112 [Source:MGI Symbol;Acc:MGI:1929115]	8276	15.6581	3.05778	0.271275	-2.39798	0.388518	2.00946	4.59283e-05	0.697309	0.0010088	0.57881	0.0433006	0.000302463	0.8205	0.0110171	0.8096	0.224768
Exosc5	Exosc5	ENSMUSG00000061286	27998	7	exosome component 5 [Source:MGI Symbol;Acc:MGI:107889]	9790	36.472	3.05434	-1.1552	-2.67733	1.53221	1.14513	0.00809026	0.286334	0.0182094	0.161942	0.451559	0.0235784	0.470495	0.0862876	0.432818	0.739375
Nat9	Nat9	ENSMUSG00000015542	66176	11	N-acetyltransferase 9 (GCN5-related, putative) [Source:MGI Symbol;Acc:MGI:1913426]	7581	53.9815	3.05307	1.26292	-1.96622	-0.176063	2.14228	5.60453e-08	0.017496	0.000253993	0.738236	0.00415375	8.29077e-07	0.0640596	0.00372705	0.891953	0.0495342
Atg4a	Atg4a	ENSMUSG00000079418	666468	X	autophagy related 4A, cysteine peptidase [Source:MGI Symbol;Acc:MGI:2147903]	9454	20.261	3.05163	0.929073	-1.68899	0.433565	1.25543	0.00119028	0.291803	0.0581789	0.622893	0.312321	0.00476508	0.475905	0.18857	0.835656	0.62624
Caskin1	Caskin1	ENSMUSG00000033597	268932	17	CASK interacting protein 1 [Source:MGI Symbol;Acc:MGI:2442952]	9504	6.61702	3.05041	-1.21632	-2.11593	2.1508	-0.0348721	0.00148449	0.17661	0.0217675	0.0205875	0.977056	0.00572028	0.337631	0.0974556	0.127949	0.99171
Xpnpep3	Xpnpep3	ENSMUSG00000022401	321003	15	X-prolyl aminopeptidase 3, mitochondrial [Source:MGI Symbol;Acc:MGI:2445217]	8769	15.6509	3.03981	0.135913	-2.28027	0.623633	1.65664	7.60251e-05	0.849092	0.00216695	0.38609	0.103162	0.000464455	0.916587	0.0195616	0.665256	0.360885
Cachd1	Cachd1	ENSMUSG00000028532	320508	4	cache domain containing 1 [Source:MGI Symbol;Acc:MGI:2444177]	5451	15.9149	3.03558	1.86832	-1.55741	-0.390142	1.94755	4.37569e-12	9.07333e-06	0.000170251	0.342145	0.000810777	1.53317e-10	0.00015645	0.00273165	0.630428	0.0154345
Camta2	Camta2	ENSMUSG00000040712	216874	11	calmodulin binding transcription activator 2 [Source:MGI Symbol;Acc:MGI:2135957]	6281	15.2006	3.03508	-0.921659	-2.46078	1.49597	0.964809	8.07383e-08	0.0812511	8.2429e-06	0.00528243	0.194532	1.14777e-06	0.197174	0.000224717	0.0535692	0.500618
Rasgrf2	Rasgrf2	ENSMUSG00000021708		13	RAS protein-specific guanine nucleotide-releasing factor 2 [Source:MGI Symbol;Acc:MGI:109137]	9656	4.99715	3.03232	-4.43181	-2.4008	5.06334	-2.66255	0.00971359	0.000340748	0.0348118	7.53296e-05	0.0893591	0.0274127	0.00302359	0.132832	0.00237144	0.33512
Zswim3	Zswim3	ENSMUSG00000045822	67538	2	zinc finger SWIM-type containing 3 [Source:MGI Symbol;Acc:MGI:1914788]	10377	7.50886	3.03046	-3.79931	-1.96166	4.8681	-2.90645	0.0472504	0.0145444	0.176514	0.00310784	0.155035	0.100221	0.0559068	0.377326	0.0369695	0.44707
Zfp637	Zfp637	ENSMUSG00000059689	232337	6	zinc finger protein 637 [Source:MGI Symbol;Acc:MGI:2448537]	9547	36.0537	3.03009	2.10779	-2.68172	-1.75942	4.44114	0.0169195	0.0885142	0.0318546	0.151149	0.0110443	0.0429948	0.209672	0.126035	0.417158	0.0945469
Gan	Gan	ENSMUSG00000052557	209239	8	giant axonal neuropathy [Source:MGI Symbol;Acc:MGI:1890619]	7612	22.7806	3.02015	0.573113	-1.89251	0.554521	1.33799	1.36599e-07	0.283487	0.000544784	0.301799	0.0770704	1.85043e-06	0.467678	0.00680638	0.592327	0.309818
Cry2	Cry2	ENSMUSG00000068742	12953	2	cryptochrome 2 (photolyase-like) [Source:MGI Symbol;Acc:MGI:1270859]	9482	10.6264	3.01135	1.68796	-1.50721	-0.183822	1.69103	0.00160727	0.0645778	0.0942688	0.837668	0.18198	0.00613072	0.168251	0.255188	0.932067	0.483687
Alkbh4	Alkbh4	ENSMUSG00000039754	72041	5	alkB homolog 4, lysine demethylase [Source:MGI Symbol;Acc:MGI:1919291]	10755	8.42915	3.00799	-3.91922	-1.55761	5.3696	-3.812	0.0475099	0.00732896	0.258279	0.000851228	0.0618402	0.100667	0.0330393	0.472973	0.0147984	0.273921
Gm10767	Gm10767	ENSMUSG00000074826	100038538	13	predicted gene 10767 [Source:MGI Symbol;Acc:MGI:3642136]	10580	13.5617	3.00206	-0.937121	-0.524903	3.41428	-2.88937	0.0515598	0.508256	0.709629	0.0292369	0.158516	0.107321	0.677096	0.837807	0.15949	0.452217
Mgp	Mgp	ENSMUSG00000030218	17313	6	matrix Gla protein [Source:MGI Symbol;Acc:MGI:96976]	9041	66.1324	2.99833	-1.58414	-0.13549	4.44698	-4.31149	0.0365882	0.242436	0.918525	0.00366407	0.0276476	0.0812808	0.421152	0.958399	0.0417626	0.170213
Tcof1	Tcof1	ENSMUSG00000024613	21453	18	treacle ribosome biogenesis factor 1 [Source:MGI Symbol;Acc:MGI:892003]	6393	15.642	2.99465	1.13463	-2.00359	-0.143572	2.14717	4.38453e-10	0.0122747	1.37705e-05	0.749514	0.000779659	1.04883e-08	0.049081	0.000343697	0.895914	0.0150854
Id4	Id4	ENSMUSG00000021379	15904	13	inhibitor of DNA binding 4 [Source:MGI Symbol;Acc:MGI:99414]	9653	24.5373	2.99313	1.64162	-1.85813	-0.506627	2.36476	0.00221395	0.080338	0.0466306	0.583872	0.0709753	0.00803283	0.195812	0.162916	0.812529	0.296033
Etnppl	Etnppl	ENSMUSG00000019232	71760	3	ethanolamine phosphate phospholyase [Source:MGI Symbol;Acc:MGI:1919010]	10536	7.62482	2.99281	-3.59877	-1.98059	4.61098	-2.63039	0.0315942	0.00983473	0.133378	0.00179841	0.157983	0.0720863	0.0415126	0.316447	0.0252703	0.45143
Taf1c	Taf1c	ENSMUSG00000031832	21341	8	TATA-box binding protein associated factor, RNA polymerase I, C [Source:MGI Symbol;Acc:MGI:109576]	10434	8.04215	2.98865	-1.89019	-2.07295	2.80589	-0.732948	0.0142069	0.103662	0.0757337	0.0205415	0.647019	0.0375961	0.234332	0.222141	0.127881	0.853263
Wdr78	Wdr78	ENSMUSG00000035126	242584	4	WD repeat domain 78 [Source:MGI Symbol;Acc:MGI:2385328]	9231	7.68123	2.98839	-5.76691	-2.59619	6.1591	-3.56292	0.00536703	1.52557e-06	0.0134999	4.95502e-07	0.0145845	0.0169036	3.3624e-05	0.0695808	3.84172e-05	0.113884
Tfeb	Tfeb	ENSMUSG00000023990	21425	17	transcription factor EB [Source:MGI Symbol;Acc:MGI:103270]	5732	32.7375	2.98527	0.610117	-1.91403	0.461122	1.45291	2.58417e-16	0.0734423	4.04889e-08	0.177943	0.0026085	1.90879e-14	0.18461	2.51491e-06	0.454821	0.0359598
Mad2l1	Mad2l1	ENSMUSG00000029910	56150	6	MAD2 mitotic arrest deficient-like 1 [Source:MGI Symbol;Acc:MGI:1860374]	9579	22.2863	2.97107	1.72776	-0.869184	0.374126	0.495058	0.0244759	0.170754	0.480439	0.761894	0.776214	0.0584342	0.329929	0.676958	0.901855	0.914295
Prkce	Prkce	ENSMUSG00000045038	18754	17	protein kinase C, epsilon [Source:MGI Symbol;Acc:MGI:97599]	10594	3.60213	2.96857	-2.81175	-2.44572	3.33459	-0.888867	0.0126331	0.0160848	0.0342223	0.00563468	0.574558	0.0342268	0.0604467	0.131362	0.0559985	0.815162
Inpp4a	Inpp4a	ENSMUSG00000026113	269180	1	inositol polyphosphate-4-phosphatase, type I [Source:MGI Symbol;Acc:MGI:1931123]	4766	14.9769	2.96803	0.306143	-2.12338	0.538508	1.58487	8.84157e-18	0.342208	1.96842e-10	0.0965963	0.000538834	8.70775e-16	0.527722	2.3647e-08	0.324176	0.0115501
Mthfd1l	Mthfd1l	ENSMUSG00000040675	270685	10	methylenetetrahydrofolate dehydrogenase (NADP+ dependent) 1-like [Source:MGI Symbol;Acc:MGI:1924836]	6906	18.0083	2.96605	-0.875851	-2.31863	1.52328	0.795349	2.70552e-07	0.104893	3.59313e-05	0.00553329	0.295462	3.36482e-06	0.236333	0.000748192	0.055242	0.609844
Dmtn	Dmtn	ENSMUSG00000022099	13829	14	dematin actin binding protein [Source:MGI Symbol;Acc:MGI:99670]	9999	7.38793	2.96513	2.03541	-1.10207	-0.172344	1.27441	0.0799569	0.213394	0.487647	0.913278	0.569365	0.151804	0.385464	0.682526	0.965116	0.813332
Nelfa	Nelfa	ENSMUSG00000029111	24116	5	negative elongation factor complex member A, Whsc2 [Source:MGI Symbol;Acc:MGI:1346098]	7941	26.1597	2.96264	-1.51012	-2.77612	1.69664	1.07949	0.000210139	0.0468005	0.000461662	0.0263903	0.306288	0.00111679	0.134436	0.00596559	0.150182	0.619146
Bex2	Bex2	ENSMUSG00000042750	12069	X	brain expressed X-linked 2 [Source:MGI Symbol;Acc:MGI:1338017]	8678	56.6133	2.96205	-0.255658	-2.40461	0.813101	1.59151	0.000350526	0.74065	0.00295761	0.296307	0.147336	0.00171605	0.848526	0.0243468	0.588736	0.436852
Pcgf6	Pcgf6	ENSMUSG00000025050	71041	19	polycomb group ring finger 6 [Source:MGI Symbol;Acc:MGI:1918291]	5989	35.605	2.96118	0.802388	-1.94078	0.21801	1.72277	4.44308e-15	0.0237639	8.30693e-08	0.539087	0.00059774	2.74417e-13	0.0806541	4.681e-06	0.779744	0.0123759
Slc39a3	Slc39a3	ENSMUSG00000046822	106947	10	solute carrier family 39 (zinc transporter), member 3 [Source:MGI Symbol;Acc:MGI:2147269]	7558	17.7074	2.95897	0.136141	-2.12748	0.695343	1.43214	1.71306e-07	0.796378	9.9419e-05	0.191201	0.056099	2.26206e-06	0.882693	0.0017788	0.473531	0.260968
Stxbp5l	Stxbp5l	ENSMUSG00000022829	207227	16	syntaxin binding protein 5-like [Source:MGI Symbol;Acc:MGI:2443815]	8586	4.27382	2.95852	0.872005	-1.44355	0.642964	0.800587	0.00083221	0.292985	0.0845162	0.438514	0.492928	0.00356214	0.477319	0.237392	0.709347	0.765633
Rnps1	Rnps1	ENSMUSG00000034681	19826	17	ribonucleic acid binding protein S1 [Source:MGI Symbol;Acc:MGI:97960]	8301	26.6572	2.94916	-2.27447	-2.4314	2.79224	-0.360843	6.79607e-05	0.00157704	0.000781016	0.000147794	0.711169	0.000421889	0.0101912	0.00905416	0.00404932	0.884319
Lhfp	Lhfp	ENSMUSG00000048332	108927	3	lipoma HMGIC fusion partner [Source:MGI Symbol;Acc:MGI:1920048]	9687	19.3571	2.94766	-0.27968	-2.06238	1.16496	0.897415	0.00213771	0.754658	0.0257374	0.200607	0.480052	0.00779502	0.856135	0.109693	0.48422	0.758396
Tnfrsf13c	Tnfrsf13c	ENSMUSG00000068105	72049	15	tumor necrosis factor receptor superfamily, member 13c [Source:MGI Symbol;Acc:MGI:1919299]	6309	36.9791	2.94457	3.40509	-1.13085	-1.59136	2.72221	1.67186e-08	2.21885e-10	0.0209248	0.00163948	0.000109123	2.79461e-07	1.26336e-08	0.0949564	0.0237882	0.00351483
2310067B10Rik	2310067B10Rik					8097	11.1383	2.94286	-1.2981	-2.89216	1.3488	1.54336	0.00110982	0.128498	0.00131656	0.114773	0.196715	0.00451361	0.271868	0.0134637	0.357365	0.503728
Igfbp5	Igfbp5	ENSMUSG00000026185	16011	1	insulin-like growth factor binding protein 5 [Source:MGI Symbol;Acc:MGI:96440]	8482	9.20425	2.94276	0.756962	-1.82705	0.358755	1.46829	1.61277e-05	0.237138	0.00510269	0.575737	0.10482	0.000125935	0.414849	0.035804	0.80785	0.363508
Scaf1	Scaf1	ENSMUSG00000038406	233208	7	SR-related CTD-associated factor 1 [Source:MGI Symbol;Acc:MGI:2141980]	7279	15.2634	2.93118	-0.156721	-2.19532	0.89258	1.30274	2.8818e-08	0.750518	1.81484e-05	0.0732244	0.0627023	4.546e-07	0.854035	0.000427989	0.274705	0.276132
Gm2027	Gm2027					10798	6.49624	2.93112	0.749202	-1.8764	0.305518	1.57088	0.0210491	0.53972	0.118521	0.807542	0.367132	0.051513	0.703496	0.294136	0.920259	0.67499
Bcat1	Bcat1	ENSMUSG00000030268	12035	6	branched chain aminotransferase 1, cytosolic [Source:MGI Symbol;Acc:MGI:104861]	3879	12.1843	2.92815	0.753626	-2.02974	0.144779	1.88496	3.03103e-18	0.0168899	3.82859e-10	0.645469	2.48716e-05	3.15574e-16	0.0625299	4.22769e-08	0.847295	0.00102991
Apex2	Apex2	ENSMUSG00000025269	77622	X	apurinic/apyrimidinic endonuclease 2 [Source:MGI Symbol;Acc:MGI:1924872]	9257	23.268	2.92813	-2.20529	-2.64971	2.48371	0.166006	0.00109135	0.0113748	0.00276162	0.00484448	0.888795	0.00444511	0.046347	0.0233128	0.0507992	0.958409
Cnnm2	Cnnm2	ENSMUSG00000064105	94219	19	cyclin M2 [Source:MGI Symbol;Acc:MGI:2151054]	7287	18.7907	2.92775	0.752462	-2.07696	0.0983293	1.97863	3.37965e-05	0.255898	0.00233334	0.881613	0.0352405	0.0002331	0.43731	0.0205391	0.951662	0.20013
Tyk2	Tyk2	ENSMUSG00000032175	54721	9	tyrosine kinase 2 [Source:MGI Symbol;Acc:MGI:1929470]	9575	8.50156	2.9277	0.207759	-1.72777	0.99217	0.735598	0.0026229	0.818776	0.0625328	0.28083	0.567757	0.00926448	0.896891	0.197233	0.573945	0.812553
Tbc1d13	Tbc1d13	ENSMUSG00000039678	70296	2	TBC1 domain family, member 13 [Source:MGI Symbol;Acc:MGI:2385326]	7457	18.0026	2.9262	0.367702	-2.20885	0.349642	1.85921	1.41911e-06	0.516958	0.000176442	0.538866	0.0212953	1.49746e-05	0.684768	0.00279434	0.779733	0.143882
Wdr34	Wdr34	ENSMUSG00000039715	71820	2	WD repeat domain 34 [Source:MGI Symbol;Acc:MGI:1919070]	10125	18.3785	2.92099	2.17218	-0.0544443	0.694371	-0.639927	0.0548889	0.140766	0.96916	0.628072	0.749279	0.112812	0.289527	0.984576	0.838325	0.902698
Zbtb9	Zbtb9	ENSMUSG00000079605	474156	17	zinc finger and BTB domain containing 9 [Source:MGI Symbol;Acc:MGI:1918022]	8261	19.8583	2.91941	0.529003	-1.87495	0.515451	1.3595	5.24056e-06	0.378028	0.00227631	0.39269	0.109861	4.70746e-05	0.560928	0.0203561	0.671061	0.371366
Fgd3	Fgd3	ENSMUSG00000037946	30938	13	FYVE, RhoGEF and PH domain containing 3 [Source:MGI Symbol;Acc:MGI:1353657]	5915	24.12	2.91764	-0.272394	-2.13218	1.05786	1.07432	5.48087e-14	0.452042	1.34702e-08	0.00396853	0.0364656	2.69896e-12	0.629119	9.64558e-07	0.0444053	0.203701
Zfp777	Zfp777	ENSMUSG00000071477	72306	6	zinc finger protein 777 [Source:MGI Symbol;Acc:MGI:1919556]	9071	15.3459	2.91756	2.25303	-1.53716	-0.872635	2.4098	0.000226444	0.00375937	0.040499	0.248196	0.0235046	0.00119186	0.0199696	0.14787	0.540493	0.15382
1700109H08Rik	1700109H08Rik	ENSMUSG00000008307	77036	5	RIKEN cDNA 1700109H08 gene [Source:MGI Symbol;Acc:MGI:1924286]	9724	50.8329	2.91731	2.09898	-0.729739	0.0885984	0.641141	0.034478	0.116548	0.570651	0.945358	0.72517	0.0772365	0.253481	0.744277	0.979635	0.889837
Gabra2	Gabra2	ENSMUSG00000000560	14395	5	gamma-aminobutyric acid (GABA) A receptor, subunit alpha 2 [Source:MGI Symbol;Acc:MGI:95614]	10898	6.85544	2.9161	3.719	-0.986874	-1.78978	2.77665	0.0199454	0.0105687	0.379138	0.246724	0.146221	0.0492531	0.0437145	0.594001	0.539545	0.435081
Rnf123	Rnf123	ENSMUSG00000041528	84585	9	ring finger protein 123 [Source:MGI Symbol;Acc:MGI:2148796]	7073	14.9512	2.91405	-0.705948	-2.29597	1.32403	0.971937	7.20352e-08	0.163706	1.32154e-05	0.0100174	0.174415	1.03617e-06	0.320665	0.000331356	0.0798183	0.474424
Snta1	Snta1	ENSMUSG00000027488	20648	2	syntrophin, acidic 1 [Source:MGI Symbol;Acc:MGI:101772]	10623	11.2668	2.91165	0.904752	-2.58375	-0.576849	3.1606	0.0277967	0.48107	0.0472041	0.653944	0.0825735	0.0648333	0.653217	0.164238	0.851781	0.321129
Cnpy3	Cnpy3	ENSMUSG00000023973	72029	17	canopy FGF signaling regulator 3 [Source:MGI Symbol;Acc:MGI:1919279]	7572	32.3872	2.9077	1.0383	-1.84299	0.0264144	1.81658	7.28265e-08	0.0420686	0.000368441	0.958562	0.0116208	1.04353e-06	0.124137	0.00502135	0.985025	0.0975721
Bzw2	Bzw2	ENSMUSG00000020547	66912	12	basic leucine zipper and W2 domains 2 [Source:MGI Symbol;Acc:MGI:1914162]	7267	34.1852	2.90736	0.267452	-2.07896	0.560952	1.51801	2.39761e-08	0.583031	3.63034e-05	0.252553	0.0282885	3.84885e-07	0.735738	0.000754504	0.545096	0.173055
9330102E08Rik	9330102E08Rik	ENSMUSG00000107879		6	RIKEN cDNA 9330102E08 gene [Source:MGI Symbol;Acc:MGI:3026973]	10219	5.68946	2.90675	-4.43789	-1.83853	5.50611	-3.66758	0.0437615	0.00334758	0.179458	0.000588959	0.0608937	0.0943034	0.0181617	0.381661	0.0112561	0.272173
Man2a1	Man2a1	ENSMUSG00000024085	17158	17	mannosidase 2, alpha 1 [Source:MGI Symbol;Acc:MGI:104669]	9489	6.99812	2.90611	1.73896	-1.43337	-0.266209	1.69958	0.00232557	0.0583468	0.112393	0.767643	0.181553	0.00837941	0.157593	0.284352	0.90381	0.482788
Nhlrc4	Nhlrc4	ENSMUSG00000090113	621239	17	NHL repeat containing 4 [Source:MGI Symbol;Acc:MGI:3687200]	10455	12.891	2.90295	-0.537983	-2.3499	1.09103	1.25888	0.019007	0.643973	0.0514033	0.355524	0.446889	0.0474611	0.783205	0.17376	0.640682	0.736861
Galnt10	Galnt10	ENSMUSG00000020520	171212	11	UDP-N-acetyl-alpha-D-galactosamine:polypeptide N-acetylgalactosaminyltransferase 10 [Source:MGI Symbol;Acc:MGI:1890480]	9875	7.5982	2.90263	-0.186698	-1.82841	1.26092	0.567496	0.0242969	0.876461	0.13871	0.302611	0.739532	0.0580956	0.933215	0.325542	0.592573	0.897787
Stard6	Stard6	ENSMUSG00000079608	170461	18	StAR-related lipid transfer (START) domain containing 6 [Source:MGI Symbol;Acc:MGI:2156774]	10312	16.5058	2.90007	-2.97473	-0.815922	5.05887	-4.24295	0.0569462	0.0467784	0.561754	0.00236244	0.0408203	0.116252	0.134432	0.737315	0.0308189	0.216836
Phb	Phb	ENSMUSG00000038845	18673;237880	11	prohibitin [Source:MGI Symbol;Acc:MGI:97572]	5383	44.4264	2.89618	1.00217	-1.91514	-0.0211321	1.93628	4.04271e-14	0.0056424	1.99515e-07	0.953217	0.00015157	2.06753e-12	0.0272499	9.52444e-06	0.983431	0.0045113
St8sia3	St8sia3	ENSMUSG00000056812	20451	18	ST8 alpha-N-acetyl-neuraminide alpha-2,8-sialyltransferase 3 [Source:MGI Symbol;Acc:MGI:106019]	9581	5.89537	2.89618	-1.76871	-1.7048	2.9601	-1.2553	0.012478	0.110465	0.123207	0.010875	0.412645	0.0338738	0.244802	0.301067	0.084256	0.711359
Rps10	Rps10	ENSMUSG00000052146	67097	17	ribosomal protein S10 [Source:MGI Symbol;Acc:MGI:1914347]	8209	96.2367	2.89067	-0.193263	-2.39569	0.688235	1.70746	0.000304727	0.796108	0.00224332	0.360304	0.108736	0.00152391	0.882484	0.0200852	0.643233	0.36986
Gm10516	Gm10516	ENSMUSG00000097316		1	predicted gene 10516 [Source:MGI Symbol;Acc:MGI:3641979]	10722	8.01527	2.89004	6.01193	-0.114494	-3.23639	3.35088	0.0296222	0.000307455	0.924414	0.0483683	0.0959094	0.0684051	0.00277777	0.961734	0.216086	0.348431
Chd3	Chd3	ENSMUSG00000018474	216848	11	chromodomain helicase DNA binding protein 3 [Source:MGI Symbol;Acc:MGI:1344395]	8535	6.93062	2.88529	0.988674	-1.8025	0.0941155	1.70839	0.00470673	0.304113	0.0656322	0.921522	0.20814	0.0151246	0.489094	0.203227	0.969407	0.516311
Akap13	Akap13	ENSMUSG00000066406	75547	7	A kinase (PRKA) anchor protein 13 [Source:MGI Symbol;Acc:MGI:2676556]	7139	5.18626	2.88415	1.63085	-1.71925	-0.465945	2.18519	6.85284e-10	0.000292472	0.000117571	0.29356	0.000493101	1.58383e-08	0.00265999	0.0020369	0.586174	0.0108244
Ntrk2	Ntrk2	ENSMUSG00000055254	18212	13	neurotrophic tyrosine kinase, receptor, type 2 [Source:MGI Symbol;Acc:MGI:97384]	4784	9.95928	2.88029	0.540894	-1.88579	0.453603	1.43219	1.3289e-13	0.137818	4.62389e-07	0.214378	0.00555309	5.92959e-12	0.284914	1.92933e-05	0.500473	0.0602246
Ppapdc2	Ppapdc2					5684	26.8983	2.87899	0.409184	-2.16485	0.304951	1.8599	1.68686e-09	0.360464	3.08612e-06	0.496201	0.00348018	3.49257e-08	0.543255	9.95206e-05	0.751237	0.0443936
Mef2d	Mef2d	ENSMUSG00000001419	17261	3	myocyte enhancer factor 2D [Source:MGI Symbol;Acc:MGI:99533]	8675	20.6488	2.86666	-0.818558	-2.01012	1.6751	0.33502	6.0631e-05	0.222608	0.00357457	0.014742	0.723447	0.000384466	0.396925	0.0279722	0.102065	0.88898
Chd3os	Chd3os	ENSMUSG00000043419		11	chromodomain helicase DNA binding protein 3, opposite strand [Source:MGI Symbol;Acc:MGI:1915359]	9493	24.4372	2.86648	1.31928	-1.92371	-0.376509	2.30022	0.00299931	0.152582	0.0385654	0.680103	0.0761316	0.0103206	0.306003	0.142866	0.863417	0.307977
Mrpl54	Mrpl54	ENSMUSG00000034932	66047	10	mitochondrial ribosomal protein L54 [Source:MGI Symbol;Acc:MGI:1913297]	6902	113.913	2.86559	0.298403	-1.9988	0.56838	1.43042	1.88249e-09	0.504262	1.41396e-05	0.20628	0.024138	3.85381e-08	0.673335	0.000351306	0.491379	0.156325
Meis3	Meis3	ENSMUSG00000041420	17537	7	Meis homeobox 3 [Source:MGI Symbol;Acc:MGI:108519]	9891	20.5975	2.85953	2.44725	-1.35561	-0.943328	2.29893	0.00523649	0.0162048	0.161403	0.338858	0.0961223	0.0165401	0.0607772	0.357758	0.627439	0.348527
Txnl4b	Txnl4b	ENSMUSG00000031723	234723	8	thioredoxin-like 4B [Source:MGI Symbol;Acc:MGI:2443724]	7400	33.4232	2.85661	-1.983	-2.6467	2.19291	0.453791	0.000130797	0.00606282	0.00034844	0.00260323	0.645902	0.000743175	0.0288043	0.00478536	0.0326359	0.853263
Fam129b	Fam129b	ENSMUSG00000026796	227737	2	family with sequence similarity 129, member B [Source:MGI Symbol;Acc:MGI:2442910]	10432	7.81454	2.85223	1.17255	-1.55605	0.12363	1.43242	0.0135357	0.287826	0.155163	0.911011	0.355846	0.0361791	0.472025	0.349238	0.964288	0.666357
Snhg4	Snhg4	ENSMUSG00000097769		18	small nucleolar RNA host gene 4 [Source:MGI Symbol;Acc:MGI:4937091]	10552	22.4024	2.85018	2.48721	-0.982826	-0.619856	1.60268	0.0218232	0.0453889	0.395764	0.611001	0.340734	0.0531411	0.131634	0.608072	0.82945	0.654065
Rad1	Rad1	ENSMUSG00000022248	19355	15	RAD1 checkpoint DNA exonuclease [Source:MGI Symbol;Acc:MGI:1316678]	4967	54.1208	2.84998	-0.746425	-2.14106	1.45535	0.685711	2.06454e-10	0.0761717	8.88756e-07	0.000669686	0.24767	5.33559e-09	0.189084	3.38532e-05	0.0123894	0.562077
Kmt2b	Kmt2b	ENSMUSG00000006307	75410	7	lysine (K)-specific methyltransferase 2B [Source:MGI Symbol;Acc:MGI:109565]	5198	9.61018	2.84657	0.312432	-2.0802	0.453935	1.62626	1.5693e-09	0.479074	5.37938e-06	0.305257	0.00954497	3.29403e-08	0.65164	0.000159145	0.594756	0.0860227
Nudt15	Nudt15	ENSMUSG00000033405	214254	14	nudix (nucleoside diphosphate linked moiety X)-type motif 15 [Source:MGI Symbol;Acc:MGI:2443366]	10511	7.59355	2.845	-2.95573	-1.45015	4.35058	-2.90044	0.0657489	0.0526791	0.318769	0.00798323	0.162534	0.130312	0.146313	0.538023	0.0682453	0.458535
Khdrbs2	Khdrbs2	ENSMUSG00000026058	170771	1	KH domain containing, RNA binding, signal transduction associated 2 [Source:MGI Symbol;Acc:MGI:2159649]	10427	16.0757	2.83855	-1.84246	-1.43853	3.24247	-1.80394	0.0844274	0.242036	0.355678	0.0524451	0.409064	0.15853	0.420726	0.572574	0.226971	0.708387
Ppp4r4	Ppp4r4	ENSMUSG00000021209	74521	12	protein phosphatase 4, regulatory subunit 4 [Source:MGI Symbol;Acc:MGI:1921771]	10131	8.45936	2.83604	0.144039	-1.03553	1.65647	-0.620945	0.0440538	0.912615	0.433898	0.22123	0.737818	0.094778	0.953888	0.640353	0.509584	0.896448
Pald1	Pald1	ENSMUSG00000020092	27355	10	phosphatase domain containing, paladin 1 [Source:MGI Symbol;Acc:MGI:1351623]	8714	6.86017	2.83225	-5.78229	-2.36375	6.25079	-3.88705	0.0104547	3.83417e-06	0.0288268	1.08084e-06	0.0103024	0.029141	7.63482e-05	0.117763	7.38482e-05	0.089813
Fgd4	Fgd4	ENSMUSG00000022788	224014	16	FYVE, RhoGEF and PH domain containing 4 [Source:MGI Symbol;Acc:MGI:2183747]	7345	19.8756	2.82292	0.563551	-1.37452	0.884855	0.489663	0.000168785	0.423025	0.0537373	0.211736	0.622111	0.000923504	0.60168	0.178667	0.498079	0.841697
B3galt4	B3galt4	ENSMUSG00000067370	54218	17	UDP-Gal:betaGlcNAc beta 1,3-galactosyltransferase, polypeptide 4 [Source:MGI Symbol;Acc:MGI:1859517]	10858	10.1216	2.81955	-1.43849	-1.35705	2.90098	-1.54393	0.0425637	0.261702	0.288699	0.0373931	0.400111	0.0920306	0.443624	0.505697	0.185725	0.700524
Ssh3	Ssh3	ENSMUSG00000034616	245857	19	slingshot homolog 3 (Drosophila) [Source:MGI Symbol;Acc:MGI:2683546]	9213	17.0728	2.81607	-0.647888	-2.15861	1.30534	0.85327	0.00116205	0.426627	0.0104996	0.11456	0.458847	0.00467903	0.605227	0.0583636	0.357003	0.74423
Lysmd4	Lysmd4	ENSMUSG00000043831	75099	7	LysM, putative peptidoglycan-binding, domain containing 4 [Source:MGI Symbol;Acc:MGI:1922349]	9580	13.7324	2.81485	-0.0369152	-1.79362	1.05815	0.735464	0.00840129	0.97053	0.0804675	0.296577	0.604143	0.0243551	0.984831	0.230662	0.589059	0.831614
Dbf4	Dbf4	ENSMUSG00000002297	27214	5	DBF4 zinc finger [Source:MGI Symbol;Acc:MGI:1351328]	10882	6.482	2.81027	0.589477	-0.564138	1.65666	-1.09252	0.0552924	0.661098	0.669212	0.253918	0.568362	0.113449	0.796904	0.811247	0.546298	0.812876
Slc25a25	Slc25a25	ENSMUSG00000026819	227731	2	solute carrier family 25 (mitochondrial carrier, phosphate carrier), member 25 [Source:MGI Symbol;Acc:MGI:1915913]	8373	15.0501	2.80954	0.880158	-2.26706	-0.337672	2.60473	0.00121246	0.283961	0.00759074	0.679627	0.0259702	0.00483393	0.467931	0.0469621	0.862913	0.162965
Acss1	Acss1	ENSMUSG00000027452	68738	2	acyl-CoA synthetase short-chain family member 1 [Source:MGI Symbol;Acc:MGI:1915988]	7917	16.3636	2.8093	1.04017	-2.05591	-0.28678	2.34269	3.91998e-05	0.108854	0.00192242	0.656351	0.0107406	0.000264526	0.242656	0.0178858	0.852874	0.0925994
Slc41a3	Slc41a3	ENSMUSG00000030089	71699	6	solute carrier family 41, member 3 [Source:MGI Symbol;Acc:MGI:1918949]	10720	7.99171	2.8081	-0.406767	-0.901743	2.31312	-1.41138	0.0868308	0.788952	0.554299	0.152155	0.514102	0.162346	0.878024	0.732307	0.419298	0.779448
Akr7a5	Akr7a5	ENSMUSG00000028743	110198	4	aldo-keto reductase family 7, member A5 (aflatoxin aldehyde reductase) [Source:MGI Symbol;Acc:MGI:107796]	8727	31.1459	2.80797	-0.669983	-2.07515	1.4028	0.672357	0.000100383	0.323571	0.00304632	0.0422312	0.483064	0.000589358	0.508303	0.0248711	0.199587	0.760012
Dnah17	Dnah17	ENSMUSG00000033987	69926	11	dynein, axonemal, heavy chain 17 [Source:MGI Symbol;Acc:MGI:1917176]	10799	1.14654	2.80756	-2.97632	-1.45264	4.33124	-2.8786	0.0466453	0.0264031	0.263167	0.00308458	0.128167	0.0992268	0.0872282	0.478772	0.0368129	0.402967
Lrsam1	Lrsam1	ENSMUSG00000026792	227738	2	leucine rich repeat and sterile alpha motif containing 1 [Source:MGI Symbol;Acc:MGI:2684789]	7007	16.422	2.80417	0.424446	-2.22346	0.156264	2.0672	2.39495e-05	0.496088	0.000604358	0.802148	0.020004	0.000175716	0.666864	0.00738433	0.917144	0.138233
Zfp956	Zfp956	ENSMUSG00000045466	101197	6	zinc finger protein 956 [Source:MGI Symbol;Acc:MGI:2141515]	9075	17.069	2.80362	1.23049	-1.86373	-0.290604	2.15433	0.0021312	0.157429	0.034142	0.736013	0.0787079	0.00777386	0.312286	0.131192	0.891139	0.313455
Apex1	Apex1	ENSMUSG00000035960	11792	14	apurinic/apyrimidinic endonuclease 1 [Source:MGI Symbol;Acc:MGI:88042]	7660	46.102	2.80298	-0.686142	-2.10258	1.38653	0.716053	4.17394e-07	0.187839	9.29935e-05	0.00885884	0.330211	4.96513e-06	0.351955	0.0016748	0.0735345	0.643814
Sfmbt2	Sfmbt2	ENSMUSG00000061186	353282	2	Scm-like with four mbt domains 2 [Source:MGI Symbol;Acc:MGI:2447794]	10740	2.64396	2.80267	0.399077	-1.3507	1.05289	0.297817	0.0312933	0.743988	0.267812	0.405269	0.869175	0.0715089	0.850405	0.482565	0.680448	0.952623
Mtfr2	Mtfr2	ENSMUSG00000019992	71804	10	mitochondrial fission regulator 2 [Source:MGI Symbol;Acc:MGI:1919054]	10364	9.02733	2.80215	-5.67021	-2.87948	5.59288	-2.7134	0.0282051	5.94188e-05	0.0245373	7.05836e-05	0.127377	0.0655482	0.000733672	0.106062	0.00224962	0.401096
Dtnb	Dtnb	ENSMUSG00000071454	13528	12	dystrobrevin, beta [Source:MGI Symbol;Acc:MGI:1203728]	7186	27.3202	2.79726	0.514623	-2.00822	0.274412	1.73381	1.25285e-06	0.343285	0.00032873	0.613712	0.0245257	1.35071e-05	0.528562	0.00458376	0.831363	0.158087
Zgrf1	Zgrf1	ENSMUSG00000051278	71643	3	zinc finger, GRF-type containing 1 [Source:MGI Symbol;Acc:MGI:1918893]	7088	9.2561	2.78931	-0.181727	-1.9554	1.01564	0.939764	1.58638e-09	0.675104	1.20064e-05	0.0208575	0.126346	3.31592e-08	0.805272	0.000307387	0.128749	0.39979
Med12l	Med12l	ENSMUSG00000056476	329650	3	mediator complex subunit 12-like [Source:MGI Symbol;Acc:MGI:2139916]	8411	5.19752	2.7884	-0.0676222	-2.37374	0.482275	1.89147	0.00145504	0.934415	0.0058312	0.558644	0.106406	0.0056167	0.96596	0.0393255	0.795708	0.366285
Mirlet7a-2	Mirlet7a-2	ENSMUSG00000092770		9	microRNA let7a-2 [Source:MGI Symbol;Acc:MGI:3619049]	10409	194.283	2.78701	-3.85489	-1.33573	5.30617	-3.97044	0.0830598	0.0192194	0.376058	0.00285461	0.0705054	0.156534	0.06864	0.591411	0.0348677	0.294829
3110057O12Rik	3110057O12Rik					6812	27.2934	2.78637	-0.0412844	-1.9244	0.903254	1.02114	2.7806e-10	0.920607	6.38612e-06	0.0312038	0.0822358	6.97411e-09	0.958119	0.000181868	0.16621	0.320157
Mipol1	Mipol1	ENSMUSG00000047022	73490	12	mirror-image polydactyly 1 [Source:MGI Symbol;Acc:MGI:1920740]	6123	50.8826	2.78611	1.47725	-1.51974	-0.210876	1.73062	7.55665e-12	0.000156061	8.97984e-05	0.584267	0.00148888	2.56551e-10	0.00160646	0.00162799	0.812529	0.024001
Nckipsd	Nckipsd	ENSMUSG00000032598;ENSMUSG00000107055	80987	9	NCK interacting protein with SH3 domain [Source:MGI Symbol;Acc:MGI:1931834]	9886	13.3975	2.78474	0.373451	-2.00261	0.408678	1.59393	0.0065871	0.698942	0.0435975	0.673683	0.245361	0.0199862	0.821153	0.155882	0.860193	0.560583
Slc2a3	Slc2a3	ENSMUSG00000003153	20527	6	solute carrier family 2 (facilitated glucose transporter), member 3 [Source:MGI Symbol;Acc:MGI:95757]	9927	9.14827	2.78308	-2.31505	-2.59905	2.49908	0.0999659	0.027516	0.061795	0.037948	0.0454468	0.952756	0.0643433	0.163649	0.141152	0.208071	0.983527
2310010J17Rik	2310010J17Rik	ENSMUSG00000097162		7	RIKEN cDNA 2310010J17 gene [Source:MGI Symbol;Acc:MGI:1925579]	9810	102.991	2.77809	0.169701	-2.34861	0.259784	2.08882	0.0125443	0.871354	0.0316115	0.804716	0.162441	0.0340113	0.930239	0.12538	0.918848	0.458389
Gpt	Gpt	ENSMUSG00000022546	76282	15	glutamic pyruvic transaminase, soluble [Source:MGI Symbol;Acc:MGI:95802]	6583	40.1666	2.77719	1.19708	-1.78402	-0.203916	1.98794	1.30412e-10	0.00372184	1.76569e-05	0.618486	0.000611941	3.52887e-09	0.0198088	0.000419621	0.833277	0.0125511
Pcdhga2	Pcdhga2	ENSMUSG00000103332	93710	18	protocadherin gamma subfamily A, 2 [Source:MGI Symbol;Acc:MGI:1935214]	10768	4.5983	2.77576	0.411542	-1.60505	0.759169	0.845882	0.01827	0.712872	0.147531	0.511841	0.599853	0.0458618	0.831266	0.338556	0.762795	0.829302
Tmem136	Tmem136	ENSMUSG00000048503	235300	9	transmembrane protein 136 [Source:MGI Symbol;Acc:MGI:2685030]	10602	5.29497	2.77307	-2.30435	-1.12517	3.95226	-2.82709	0.082744	0.134599	0.451286	0.0180276	0.187814	0.15612	0.280114	0.655261	0.116476	0.490956
Mtr	Mtr	ENSMUSG00000021311	238505	13	5-methyltetrahydrofolate-homocysteine methyltransferase [Source:MGI Symbol;Acc:MGI:894292]	9400	9.50223	2.76681	-2.17911	-2.84258	2.10334	0.739234	0.00792347	0.032638	0.00653889	0.0386614	0.593943	0.0231603	0.101646	0.0424989	0.189613	0.827916
Zfp444	Zfp444	ENSMUSG00000044876	72667	7	zinc finger protein 444 [Source:MGI Symbol;Acc:MGI:1923365]	9898	6.88767	2.76201	-4.46643	-2.57652	4.65192	-2.07539	0.00917262	7.92516e-05	0.0140892	4.75138e-05	0.147012	0.026161	0.000922661	0.0716601	0.00162592	0.436366
Gm3219	Gm3219					10232	52.1324	2.75769	5.5117	-0.51074	-3.26475	3.77549	0.0191087	7.1536e-05	0.641558	0.0118712	0.0251756	0.0476715	0.00084819	0.792342	0.0892208	0.160384
Lat2	Lat2	ENSMUSG00000040751	56743	5	linker for activation of T cells family, member 2 [Source:MGI Symbol;Acc:MGI:1926479]	10616	14.2124	2.75649	-3.07946	-2.71235	3.1236	-0.411251	0.033514	0.0185934	0.035834	0.0173406	0.814471	0.0756349	0.0669731	0.135502	0.113843	0.929881
Satb2	Satb2	ENSMUSG00000038331	212712	1	special AT-rich sequence binding protein 2 [Source:MGI Symbol;Acc:MGI:2679336]	9518	7.96335	2.74909	-1.38288	-2.51904	1.61294	0.906097	0.00650719	0.152252	0.0117842	0.0973795	0.500995	0.0197822	0.305566	0.0633046	0.325105	0.772107
Unc93b1	Unc93b1	ENSMUSG00000036908	54445	19	unc-93 homolog B1 (C. elegans) [Source:MGI Symbol;Acc:MGI:1859307]	8134	27.8544	2.74908	-0.906821	-2.09086	1.56504	0.525821	4.85968e-05	0.156316	0.0015048	0.0161958	0.558946	0.00031793	0.311208	0.0148873	0.109292	0.807894
Ldlrap1	Ldlrap1	ENSMUSG00000037295	100017	4	low density lipoprotein receptor adaptor protein 1 [Source:MGI Symbol;Acc:MGI:2140175]	7357	23.7843	2.74701	0.381939	-1.76249	0.602579	1.15991	3.00203e-08	0.413118	0.000219622	0.199717	0.0794499	4.72204e-07	0.5933	0.00332536	0.483173	0.314805
Zfp617	Zfp617	ENSMUSG00000066880	170938	8	zinc finger protein 617 [Source:MGI Symbol;Acc:MGI:2684459]	5740	26.3678	2.74508	0.600519	-1.89419	0.250374	1.64381	3.0202e-12	0.106076	6.39448e-07	0.500815	0.00180002	1.09327e-10	0.238171	2.55126e-05	0.754121	0.0274634
Palb2	Palb2	ENSMUSG00000044702	233826	7	partner and localizer of BRCA2 [Source:MGI Symbol;Acc:MGI:3040695]	10271	6.09112	2.74361	-4.89168	-2.40439	5.23089	-2.8265	0.0270463	0.000250109	0.0481592	0.000123684	0.0954603	0.0634212	0.00236727	0.166238	0.00348483	0.348089
Pars2	Pars2	ENSMUSG00000043572	230577	4	prolyl-tRNA synthetase (mitochondrial)(putative) [Source:MGI Symbol;Acc:MGI:2386296]	10144	14.5159	2.74133	-1.93105	-2.15313	2.51925	-0.366124	0.0112558	0.0650607	0.0409987	0.0189091	0.798429	0.0310492	0.169297	0.149075	0.120393	0.922076
Rpl10	Rpl10	ENSMUSG00000008682	110954;434434	X	ribosomal protein L10 [Source:MGI Symbol;Acc:MGI:105943]	10091	44.2868	2.74012	-0.23895	-2.06574	0.913329	1.15241	0.0102423	0.812129	0.0464215	0.369401	0.419768	0.0286657	0.89255	0.162394	0.651151	0.716621
1110065P20Rik	1110065P20Rik	ENSMUSG00000078570	68920	4	RIKEN cDNA 1110065P20 gene [Source:MGI Symbol;Acc:MGI:1916170]	9992	48.3921	2.73936	2.02299	-1.29568	-0.579314	1.875	0.0124356	0.0597377	0.212783	0.580804	0.203981	0.0337753	0.160088	0.422936	0.8109	0.510494
Ankrd35	Ankrd35	ENSMUSG00000038354	213121	3	ankyrin repeat domain 35 [Source:MGI Symbol;Acc:MGI:2442590]	10262	7.91256	2.73824	0.552547	-2.26699	-0.0812914	2.34828	0.0229826	0.629321	0.0547238	0.943446	0.149821	0.0555118	0.771531	0.180628	0.978676	0.439835
Ttc13	Ttc13	ENSMUSG00000037300	234875	8	tetratricopeptide repeat domain 13 [Source:MGI Symbol;Acc:MGI:2384573]	7021	21.6462	2.73008	0.198448	-1.96665	0.564982	1.40167	5.84979e-08	0.675349	5.62863e-05	0.235932	0.0372228	8.61859e-07	0.805272	0.00110075	0.529189	0.205619
Angel1	Angel1	ENSMUSG00000021257	68737	12	angel homolog 1 [Source:MGI Symbol;Acc:MGI:1915987]	9748	10.3542	2.73008	0.635366	-1.74472	0.349988	1.39473	0.00561712	0.495502	0.065835	0.70807	0.290652	0.0175447	0.66644	0.203422	0.875834	0.60622
Ppp2r3d	Ppp2r3d	ENSMUSG00000093803;ENSMUSG00000099077		9	protein phosphatase 2 (formerly 2A), regulatory subunit B'', delta [Source:MGI Symbol;Acc:MGI:1335093]	9894	15.1381	2.72152	1.32961	-1.67813	-0.286224	1.96436	0.0070795	0.171228	0.0837214	0.766365	0.149287	0.0211226	0.330542	0.235835	0.903472	0.439238
1500011K16Rik	1500011K16Rik	ENSMUSG00000051319		2	RIKEN cDNA 1500011K16 gene [Source:MGI Symbol;Acc:MGI:1915135]	4581	109.105	2.71651	0.801368	-1.88565	0.0294954	1.85615	1.23537e-12	0.0269919	3.57768e-07	0.934883	0.000296919	4.78903e-11	0.088558	1.5459e-05	0.975258	0.00751369
Wdr81	Wdr81	ENSMUSG00000045374	192652	11	WD repeat domain 81 [Source:MGI Symbol;Acc:MGI:2681828]	6956	9.70337	2.71606	-0.1042	-1.98689	0.833372	1.15352	1.09419e-08	0.815761	1.66456e-05	0.0650175	0.0690708	1.92002e-07	0.89537	0.0004017	0.258462	0.29165
Rassf1	Rassf1	ENSMUSG00000010067	56289	9	Ras association (RalGDS/AF-6) domain family member 1 [Source:MGI Symbol;Acc:MGI:1928386]	9641	23.1489	2.7159	0.400015	-1.74866	0.56723	1.18143	0.00402716	0.653282	0.0544498	0.526844	0.349511	0.0132925	0.790522	0.18005	0.772423	0.661162
Pomt1	Pomt1	ENSMUSG00000039254	99011	2	protein-O-mannosyltransferase 1 [Source:MGI Symbol;Acc:MGI:2138994]	8570	18.7874	2.71508	0.218201	-1.86371	0.633166	1.23055	7.16554e-05	0.734708	0.0048185	0.328993	0.178078	0.000442313	0.845693	0.0344847	0.618476	0.477846
Asph	Asph	ENSMUSG00000028207	65973	4	aspartate-beta-hydroxylase [Source:MGI Symbol;Acc:MGI:1914186]	9532	6.39681	2.71457	1.34163	-1.75366	-0.38072	2.13438	0.00564679	0.154459	0.0635352	0.682939	0.10651	0.0176222	0.308482	0.198839	0.864407	0.366344
Tbc1d4	Tbc1d4	ENSMUSG00000033083	210789	14	TBC1 domain family, member 4 [Source:MGI Symbol;Acc:MGI:2429660]	7869	8.83797	2.71272	-0.0681117	-1.9902	0.790628	1.19958	3.07623e-05	0.911412	0.001651	0.200399	0.167435	0.000215711	0.953268	0.0160433	0.48404	0.465298
Nudt18	Nudt18	ENSMUSG00000045211	213484	14	nudix (nucleoside diphosphate linked moiety X)-type motif 18 [Source:MGI Symbol;Acc:MGI:2385853]	9433	11.7086	2.71227	-0.52228	-2.42519	0.809356	1.61583	0.00751865	0.585683	0.0155507	0.400593	0.234702	0.0221249	0.737675	0.0768535	0.67665	0.548305
Rdm1	Rdm1	ENSMUSG00000010362	66599	11	RAD52 motif 1 [Source:MGI Symbol;Acc:MGI:1913849]	10290	28.5842	2.70303	2.58656	-1.22059	-1.10412	2.32471	0.0518137	0.0639862	0.354744	0.412492	0.217625	0.107706	0.167428	0.571743	0.6877	0.529806
Hfe	Hfe	ENSMUSG00000006611	15216	13	hemochromatosis [Source:MGI Symbol;Acc:MGI:109191]	10713	9.95357	2.70287	-2.71664	-1.32966	4.08986	-2.7602	0.0701975	0.0602868	0.340625	0.00881978	0.169298	0.137207	0.16102	0.557938	0.0733215	0.467955
Helq	Helq	ENSMUSG00000035266	191578	5	helicase, POLQ-like [Source:MGI Symbol;Acc:MGI:2176740]	9635	10.905	2.70282	2.71433	-0.866085	-0.8776	1.74368	0.0124972	0.0126164	0.39575	0.398131	0.23096	0.033909	0.0502448	0.608072	0.674786	0.544619
Midn	Midn	ENSMUSG00000035621	59090	10	midnolin [Source:MGI Symbol;Acc:MGI:1890222]	10926	3.75726	2.70128	-0.551877	-2.29833	0.954826	1.3435	0.0365635	0.671454	0.065448	0.477778	0.479674	0.0812423	0.803293	0.203088	0.736675	0.758396
Abhd15	Abhd15	ENSMUSG00000000686	67477	11	abhydrolase domain containing 15 [Source:MGI Symbol;Acc:MGI:1914727]	10738	5.29754	2.70059	-2.63377	-1.67317	3.66119	-1.98802	0.0617173	0.0610146	0.222147	0.0139889	0.305289	0.123911	0.16225	0.433585	0.0991745	0.618156
Flad1	Flad1	ENSMUSG00000042642	319945	3	flavin adenine dinucleotide synthetase 1 [Source:MGI Symbol;Acc:MGI:2443030]	7805	27.1032	2.69933	-0.623266	-2.13823	1.18437	0.953865	1.32146e-05	0.286736	0.000414302	0.0454183	0.248535	0.000105734	0.470837	0.00550322	0.208071	0.562755
Ank1	Ank1	ENSMUSG00000031543	11733	8	ankyrin 1, erythroid [Source:MGI Symbol;Acc:MGI:88024]	10859	2.23504	2.69533	1.89435	-1.16381	-0.362826	1.52663	0.0261491	0.122505	0.298404	0.775235	0.370662	0.0617413	0.262902	0.516378	0.905725	0.677378
Mterfd2	Mterfd2					7884	17.7617	2.69508	1.64353	-1.71881	-0.667257	2.38606	2.63748e-05	0.0081919	0.00541259	0.275195	0.00593583	0.00018994	0.0359943	0.0373787	0.568758	0.0630618
Ampd2	Ampd2	ENSMUSG00000027889	109674	3	adenosine monophosphate deaminase 2 [Source:MGI Symbol;Acc:MGI:88016]	8805	14.2326	2.69428	0.434618	-2.06411	0.195557	1.86855	0.00117334	0.579473	0.0107844	0.80328	0.0939005	0.00471577	0.733534	0.0591842	0.917698	0.344817
Bsn	Bsn	ENSMUSG00000032589	12217	9	bassoon [Source:MGI Symbol;Acc:MGI:1277955]	10588	1.55905	2.69287	-1.96587	-2.36861	2.29013	0.0784834	0.0271138	0.0973181	0.0480792	0.0572898	0.96335	0.0635388	0.223909	0.166119	0.241197	0.986595
1110020A21Rik	1110020A21Rik	ENSMUSG00000097047		17	RIKEN cDNA 1110020A21 gene [Source:MGI Symbol;Acc:MGI:1915781]	9709	69.2082	2.69243	0.859976	-1.87863	-0.0461788	1.92481	0.00608247	0.357333	0.048055	0.960479	0.145384	0.0187213	0.540075	0.166088	0.98551	0.433299
Pop5	Pop5	ENSMUSG00000060152	117109	5	processing of precursor 5, ribonuclease P/MRP family (S. cerevisiae) [Source:MGI Symbol;Acc:MGI:2151221]	8389	55.2179	2.69067	-0.283224	-2.10667	0.867223	1.23945	9.93201e-05	0.663811	0.00180472	0.187132	0.17997	0.000583746	0.798431	0.0170373	0.468667	0.480331
Hlf	Hlf	ENSMUSG00000003949	217082	11	hepatic leukemia factor [Source:MGI Symbol;Acc:MGI:96108]	9242	8.21632	2.68929	-0.387332	-1.68231	1.39432	0.287991	0.00963315	0.691873	0.0925935	0.161824	0.835381	0.0272399	0.81616	0.251987	0.432818	0.938138
Aup1	Aup1	ENSMUSG00000068328	11993	6	ancient ubiquitous protein 1 [Source:MGI Symbol;Acc:MGI:107789]	9861	25.2666	2.6869	-0.575052	-1.91542	1.34654	0.568881	0.00679161	0.539361	0.0464494	0.158107	0.668176	0.0204403	0.703112	0.162439	0.428145	0.865109
Dlc1	Dlc1	ENSMUSG00000031523	50768	8	deleted in liver cancer 1 [Source:MGI Symbol;Acc:MGI:1354949]	9134	7.68782	2.68511	3.10889	-1.22029	-1.64407	2.86436	0.00101103	0.000219404	0.115815	0.0411328	0.0104	0.00418911	0.00212071	0.28959	0.196789	0.0903754
1700024F13Rik	1700024F13Rik					8974	73.0603	2.68367	0.966024	-1.9364	-0.218751	2.15515	0.00168887	0.235637	0.019642	0.787163	0.0615192	0.00638629	0.413282	0.0910243	0.910798	0.273385
Nsun6	Nsun6	ENSMUSG00000026707	74455	2	NOL1/NOP2/Sun domain family member 6 [Source:MGI Symbol;Acc:MGI:1921705]	7158	21.2392	2.68358	0.351297	-2.02111	0.31117	1.70994	1.45352e-05	0.547433	0.000803617	0.594765	0.0394119	0.000114978	0.708927	0.00926703	0.817859	0.213187
Smim11	Smim11	ENSMUSG00000051989	68936	16	small integral membrane protein 11 [Source:MGI Symbol;Acc:MGI:1916186]	9163	93.8832	2.68054	0.79534	-2.20745	-0.32225	2.5297	0.00592181	0.390385	0.0208797	0.726978	0.0550985	0.0183222	0.571923	0.0947911	0.885809	0.259181
Tmem120a	Tmem120a	ENSMUSG00000039886	215210	5	transmembrane protein 120A [Source:MGI Symbol;Acc:MGI:2686991]	10613	15.5687	2.67765	-4.02131	-2.3175	4.38146	-2.06396	0.0305377	0.00158937	0.0553077	0.000778348	0.222913	0.0701047	0.0102305	0.181897	0.0138356	0.536404
Tmem185b	Tmem185b	ENSMUSG00000098923	226351	1	transmembrane protein 185B [Source:MGI Symbol;Acc:MGI:1917634]	10398	9.87574	2.67586	3.19408	-0.72507	-1.24329	1.96836	0.0403868	0.018083	0.55382	0.334575	0.267636	0.0881607	0.0656101	0.732121	0.62416	0.583278
2810006K23Rik	2810006K23Rik	ENSMUSG00000047635	72650	5	RIKEN cDNA 2810006K23 gene [Source:MGI Symbol;Acc:MGI:1919900]	8320	32.5125	2.67214	-0.701036	-2.2218	1.15138	1.07042	0.000157016	0.294788	0.00136761	0.0883382	0.257268	0.000868746	0.478669	0.0139077	0.308535	0.572918
Rcor2	Rcor2	ENSMUSG00000024968	104383	19	REST corepressor 2 [Source:MGI Symbol;Acc:MGI:1859854]	10489	9.86286	2.67128	-4.62377	-2.29407	5.00098	-2.70691	0.0378166	0.000679457	0.0679046	0.000330914	0.124965	0.0835629	0.0052826	0.207646	0.00741551	0.398302
Gm6524	Gm6524	ENSMUSG00000110177		8	predicted gene 6524 [Source:MGI Symbol;Acc:MGI:3648756]	10710	13.795	2.66946	2.48062	-0.392768	-0.203928	0.596696	0.0462969	0.0638773	0.750884	0.877744	0.742877	0.0985439	0.167299	0.864161	0.949392	0.899749
Mrps12	Mrps12	ENSMUSG00000045948	24030	7	mitochondrial ribosomal protein S12 [Source:MGI Symbol;Acc:MGI:1346333]	10405	42.4622	2.66632	-0.168449	-1.79705	1.03773	0.759319	0.0187392	0.875048	0.100209	0.341568	0.618921	0.0468995	0.932179	0.264023	0.630001	0.840711
Faxc	Faxc	ENSMUSG00000028246	76132	4	failed axon connections homolog [Source:MGI Symbol;Acc:MGI:1923382]	7950	6.32276	2.66529	1.72516	-1.57249	-0.632368	2.20486	3.4569e-06	0.00203696	0.00433589	0.249916	0.00453734	3.27432e-05	0.012377	0.0319838	0.542296	0.0524336
Ttc9	Ttc9	ENSMUSG00000042734	69480	12	tetratricopeptide repeat domain 9 [Source:MGI Symbol;Acc:MGI:1916730]	4679	42.7562	2.65539	0.26195	-2.02227	0.371172	1.65109	9.99342e-09	0.548797	7.72187e-06	0.39651	0.00787204	1.77063e-07	0.710161	0.00021317	0.673709	0.0757545
Med26	Med26	ENSMUSG00000045248	70625	8	mediator complex subunit 26 [Source:MGI Symbol;Acc:MGI:1917875]	7886	19.3611	2.64643	-0.217408	-2.26425	0.599592	1.66466	0.000318841	0.754058	0.00176158	0.389571	0.0917009	0.00158435	0.85583	0.0167458	0.668256	0.339895
Gm6194	Gm6194					10908	9.23034	2.64278	-0.630827	-1.1657	2.10791	-0.942205	0.0476057	0.60637	0.337941	0.114545	0.590298	0.100754	0.753962	0.556199	0.357003	0.825448
Mars2	Mars2	ENSMUSG00000046994	212679	1	methionine-tRNA synthetase 2 (mitochondrial) [Source:MGI Symbol;Acc:MGI:2444136]	6827	23.8098	2.63548	-0.0643448	-2.04432	0.655502	1.38882	8.28089e-07	0.89855	9.09463e-05	0.196759	0.0526936	9.32304e-06	0.946044	0.00164607	0.478928	0.252541
Bambi	Bambi	ENSMUSG00000024232	68010	18	BMP and activin membrane-bound inhibitor [Source:MGI Symbol;Acc:MGI:1915260]	10776	3.91247	2.63509	-0.268593	-0.950118	1.95357	-1.00345	0.0499667	0.829681	0.446904	0.140778	0.572591	0.104763	0.904284	0.65156	0.400883	0.814842
Aarsd1	Aarsd1	ENSMUSG00000075528	69684	11	alanyl-tRNA synthetase domain containing 1 [Source:MGI Symbol;Acc:MGI:1916934]	4249	69.5613	2.63479	1.19652	-1.61424	-0.175966	1.7902	7.10736e-22	5.3998e-06	9.42804e-10	0.500055	1.25028e-06	1.27373e-19	0.000101427	9.54327e-08	0.753807	8.76156e-05
2310009B15Rik	2310009B15Rik	ENSMUSG00000079283	69549	1	RIKEN cDNA 2310009B15 gene [Source:MGI Symbol;Acc:MGI:1916799]	9446	77.1124	2.63351	0.39199	-2.18594	0.0555825	2.13036	0.0117143	0.692052	0.033142	0.955227	0.131095	0.0320714	0.816216	0.128889	0.984134	0.407952
Lims2	Lims2	ENSMUSG00000024395	225341	18	LIM and senescent cell antigen like domains 2 [Source:MGI Symbol;Acc:MGI:2385067]	4926	48.8081	2.61738	-1.77298	-2.35321	2.03715	0.316059	3.3009e-09	3.62762e-05	7.57921e-08	2.58245e-06	0.592439	6.44382e-08	0.000492024	4.30452e-06	0.000158603	0.826956
Plekhf2	Plekhf2	ENSMUSG00000049969	71801	4	pleckstrin homology domain containing, family F (with FYVE domain) member 2 [Source:MGI Symbol;Acc:MGI:1919051]	9437	14.9975	2.6162	3.21737	-1.3157	-1.91687	3.23257	0.00326414	0.000509526	0.121365	0.031086	0.00853695	0.0110991	0.00418178	0.29826	0.166096	0.0799708
Acsf3	Acsf3	ENSMUSG00000015016	257633	8	acyl-CoA synthetase family member 3 [Source:MGI Symbol;Acc:MGI:2182591]	8711	11.0446	2.61588	-6.38663	-1.4592	7.5433	-6.0841	0.0300739	4.14618e-06	0.201427	2.86906e-07	0.000386328	0.0692315	8.15216e-05	0.409057	2.45035e-05	0.00910203
Eif2d	Eif2d	ENSMUSG00000026427	16865	1	eukaryotic translation initiation factor 2D [Source:MGI Symbol;Acc:MGI:109342]	6520	33.3488	2.61236	-0.293728	-2.09573	0.810358	1.28538	3.44512e-07	0.544247	2.99268e-05	0.0967223	0.0613747	4.18003e-06	0.706281	0.00064149	0.324346	0.273076
Xndc1	Xndc1	ENSMUSG00000099481	102443350	7	Xrcc1 N-terminal domain containing 1 [Source:MGI Symbol;Acc:MGI:5546359]	8295	17.2633	2.61099	0.660316	-1.75699	0.193683	1.56331	3.52628e-05	0.271028	0.0040262	0.746839	0.0656223	0.000241385	0.454173	0.0304287	0.895027	0.283095
Zdhhc12	Zdhhc12	ENSMUSG00000015335	66220	2	zinc finger, DHHC domain containing 12 [Source:MGI Symbol;Acc:MGI:1913470]	7032	55.7764	2.61035	1.28386	-1.59094	-0.264454	1.8554	7.7148e-09	0.00319704	0.000255749	0.539979	0.00236785	1.38943e-07	0.0175452	0.00374293	0.78062	0.03353
E330034G19Rik	E330034G19Rik	ENSMUSG00000038925	105418	14	RIKEN cDNA E330034G19 gene [Source:MGI Symbol;Acc:MGI:2145557]	10788	13.8868	2.60978	2.93492	-1.17496	-1.5001	2.67506	0.0242492	0.0191503	0.278154	0.235911	0.108438	0.0580093	0.0684827	0.493713	0.529189	0.369759
Nr4a1	Nr4a1	ENSMUSG00000023034	15370	15	nuclear receptor subfamily 4, group A, member 1 [Source:MGI Symbol;Acc:MGI:1352454]	9961	13.6657	2.60867	2.81247	-1.02844	-1.23223	2.26067	0.0612043	0.0465249	0.437193	0.360997	0.23156	0.123152	0.133951	0.642739	0.643541	0.545211
St3gal1	St3gal1	ENSMUSG00000013846	20442	15	ST3 beta-galactoside alpha-2,3-sialyltransferase 1 [Source:MGI Symbol;Acc:MGI:98304]	8385	9.35967	2.60829	4.05589	-0.914223	-2.36182	3.27605	7.27506e-05	1.23512e-08	0.141931	0.000433154	0.000332868	0.000447627	4.87449e-07	0.330407	0.00900236	0.00810449
1700017B05Rik	1700017B05Rik	ENSMUSG00000032300	74211	9	RIKEN cDNA 1700017B05 gene [Source:MGI Symbol;Acc:MGI:1921461]	10605	4.8219	2.60782	6.35119	-0.527442	-4.27081	4.79826	0.0408664	0.000139707	0.657552	0.0085414	0.0168457	0.0889942	0.00147563	0.803906	0.071537	0.123928
Dnttip1	Dnttip1	ENSMUSG00000017299	76233	2	deoxynucleotidyltransferase, terminal, interacting protein 1 [Source:MGI Symbol;Acc:MGI:1923483]	5410	64.9655	2.60383	-0.010458	-1.94118	0.673107	1.26807	8.03098e-12	0.976817	1.68076e-07	0.0632416	0.0130432	2.7181e-10	0.988229	8.31407e-06	0.254176	0.105621
Engase	Engase	ENSMUSG00000033857	217364	11	endo-beta-N-acetylglucosaminidase [Source:MGI Symbol;Acc:MGI:2443788]	10414	5.08387	2.60292	-2.93114	-0.909725	4.62433	-3.7146	0.109252	0.0704223	0.551382	0.00874798	0.0950432	0.194614	0.17912	0.730678	0.072891	0.347467
Phyhd1	Phyhd1	ENSMUSG00000079484	227696	2	phytanoyl-CoA dioxygenase domain containing 1 [Source:MGI Symbol;Acc:MGI:3612860]	8524	31.0186	2.59753	4.52082	-0.354944	-2.27824	2.63318	0.0143316	0.000101743	0.722452	0.0318214	0.0688048	0.0378347	0.00113961	0.845593	0.167892	0.291532
Txndc5	Txndc5	ENSMUSG00000038991	105245	13	thioredoxin domain containing 5 [Source:MGI Symbol;Acc:MGI:2145316]	9959	8.80738	2.59513	-5.90502	-2.33518	6.16496	-3.82978	0.0356888	2.28092e-05	0.0548367	1.3247e-05	0.0257484	0.0796061	0.000335599	0.180823	0.0005863	0.161957
2410015M20Rik	2410015M20Rik	ENSMUSG00000049760	224904	17	RIKEN cDNA 2410015M20 gene [Source:MGI Symbol;Acc:MGI:2442174]	7013	85.3878	2.59492	-0.921588	-1.79905	1.71746	0.0815906	1.48815e-07	0.0496353	0.000172089	0.000345632	0.901813	1.99911e-06	0.140174	0.00274568	0.00766419	0.963347
1190005I06Rik	1190005I06Rik	ENSMUSG00000043687	68918	8	RIKEN cDNA 1190005I06 gene [Source:MGI Symbol;Acc:MGI:1916168]	9565	57.7799	2.59472	3.75286	-1.3189	-2.47703	3.79593	0.00854319	0.000379114	0.162177	0.0141731	0.00594307	0.0246813	0.00328927	0.358381	0.0999618	0.0630773
Ttyh3	Ttyh3	ENSMUSG00000036565	78339	5	tweety family member 3 [Source:MGI Symbol;Acc:MGI:1925589]	9170	10.2226	2.59152	-0.174672	-1.98827	0.777919	1.21035	0.00206183	0.826236	0.0154722	0.332155	0.283797	0.00755613	0.901978	0.0766389	0.621383	0.600787
Habp4	Habp4	ENSMUSG00000021476	56541	13	hyaluronic acid binding protein 4 [Source:MGI Symbol;Acc:MGI:1891713]	7115	25.5529	2.59001	0.528948	-1.67076	0.390297	1.28046	4.38832e-08	0.238767	0.00025576	0.38618	0.0439369	6.65369e-07	0.41665	0.00374293	0.665256	0.22666
Foxg1	Foxg1	ENSMUSG00000020950	15228	12	forkhead box G1 [Source:MGI Symbol;Acc:MGI:1347464]	8663	13.1544	2.58894	-0.176686	-1.90814	0.857483	1.05066	0.000237321	0.790829	0.0053965	0.202392	0.266099	0.00123719	0.879574	0.0373119	0.48638	0.582532
Eef1e1	Eef1e1	ENSMUSG00000001707	66143	13	eukaryotic translation elongation factor 1 epsilon 1 [Source:MGI Symbol;Acc:MGI:1913393]	7211	63.2953	2.58689	0.172648	-1.82232	0.59193	1.23039	5.21948e-06	0.74781	0.00095304	0.273029	0.106329	4.69476e-05	0.852423	0.0105196	0.566068	0.366222
Cystm1	Cystm1	ENSMUSG00000046727	66060	18	cysteine-rich transmembrane module containing 1 [Source:MGI Symbol;Acc:MGI:1913310]	7468	104.554	2.5868	-0.243367	-1.85945	0.970716	0.888738	1.46836e-05	0.666212	0.00135952	0.0887708	0.266234	0.000115983	0.799936	0.013864	0.309039	0.582532
Zmat5	Zmat5	ENSMUSG00000009076	67178	11	zinc finger, matrin type 5 [Source:MGI Symbol;Acc:MGI:1914428]	8489	68.9701	2.57793	0.0994426	-1.78945	0.689029	1.10043	9.1989e-05	0.873327	0.00513764	0.273116	0.213625	0.000545053	0.931163	0.0359799	0.566068	0.524798
Trib2	Trib2	ENSMUSG00000020601	217410	12	tribbles pseudokinase 2 [Source:MGI Symbol;Acc:MGI:2145021]	10261	6.24932	2.57623	8.28432	1.79688	-3.91121	2.11434	0.08781	4.29457e-05	0.214864	0.0284282	0.318425	0.163756	0.000564961	0.42514	0.157037	0.632109
Tpx2	Tpx2	ENSMUSG00000027469	72119	2	TPX2, microtubule-associated [Source:MGI Symbol;Acc:MGI:1919369]	9642	8.54776	2.56854	-3.43963	-2.18766	3.82052	-1.63287	0.00922047	0.000722617	0.0240995	0.000230349	0.219316	0.0262701	0.0055514	0.105135	0.00573838	0.531846
Trpv3	Trpv3	ENSMUSG00000043029	246788	11	transient receptor potential cation channel, subfamily V, member 3 [Source:MGI Symbol;Acc:MGI:2181407]	10012	14.0192	2.5681	4.19604	-1.82561	-3.45355	5.27916	0.0443348	0.00295243	0.141449	0.0119407	0.0042769	0.0952758	0.0164589	0.329777	0.0895304	0.0503827
Znf512b	Znf512b					7094	12.1976	2.56785	-0.216874	-2.00865	0.776067	1.23259	4.25353e-06	0.681551	0.000236221	0.144916	0.100187	3.91411e-05	0.809157	0.00352111	0.407564	0.355482
Msrb2	Msrb2	ENSMUSG00000023094	76467	2	methionine sulfoxide reductase B2 [Source:MGI Symbol;Acc:MGI:1923717]	9405	37.6861	2.56747	1.54337	-1.25599	-0.231899	1.48789	0.00746485	0.0970002	0.170942	0.799909	0.249809	0.0219962	0.223479	0.370028	0.916134	0.564006
Hdac6	Hdac6	ENSMUSG00000031161	15185	X	histone deacetylase 6 [Source:MGI Symbol;Acc:MGI:1333752]	8814	12.4876	2.56512	0.0466257	-1.80816	0.710335	1.09783	0.000514218	0.946819	0.0117154	0.313457	0.268337	0.00238095	0.972255	0.0630277	0.602028	0.584007
Zfp628	Zfp628	ENSMUSG00000074406	232816	7	zinc finger protein 628 [Source:MGI Symbol;Acc:MGI:2665174]	8940	9.3077	2.55843	-5.94428	-2.68885	5.81386	-3.125	0.00240279	7.57484e-10	0.00151717	1.37851e-09	0.00724051	0.00861506	3.90604e-08	0.0149826	1.98288e-07	0.0717618
2310061J03Rik	2310061J03Rik					10062	25.0533	2.55829	-0.910126	-1.45161	2.01681	-0.565196	0.0267927	0.406804	0.190413	0.0755013	0.71378	0.0629481	0.587164	0.395664	0.280068	0.885276
Gm14305	Gm14305	ENSMUSG00000078878	668030;100043387	2	predicted gene 14305 [Source:MGI Symbol;Acc:MGI:3709632]	8553	33.1153	2.55378	2.56022	-1.37259	-1.37903	2.75162	0.000147417	0.000166282	0.0334341	0.0363797	0.00285209	0.000824749	0.00169571	0.129501	0.1826	0.0384926
C030006K11Rik	C030006K11Rik					9333	25.3473	2.5512	-1.22024	-2.17672	1.59472	0.582006	0.00425448	0.154082	0.0132551	0.0654804	0.626864	0.013896	0.307959	0.068708	0.259404	0.843846
Relb	Relb	ENSMUSG00000002983	19698	7	avian reticuloendotheliosis viral (v-rel) oncogene related B [Source:MGI Symbol;Acc:MGI:103289]	10382	12.8789	2.55014	1.08581	-2.30506	-0.840728	3.14578	0.0638113	0.415867	0.0904586	0.527835	0.0973767	0.127181	0.595559	0.248403	0.772763	0.350864
Irf2bp1	Irf2bp1	ENSMUSG00000044030	272359	7	interferon regulatory factor 2 binding protein 1 [Source:MGI Symbol;Acc:MGI:2442159]	7910	21.7566	2.546	0.303442	-1.99959	0.242965	1.75662	0.000449319	0.659184	0.00488049	0.724328	0.0726743	0.00212426	0.795386	0.0347128	0.884634	0.299947
Rps6kl1	Rps6kl1	ENSMUSG00000019235	238323	12	ribosomal protein S6 kinase-like 1 [Source:MGI Symbol;Acc:MGI:2443413]	9337	15.1885	2.54598	-3.42596	-3.11894	2.853	0.265941	0.0658523	0.0171824	0.0279212	0.0417405	0.885471	0.130463	0.0632663	0.115226	0.198481	0.956925
Nat10	Nat10	ENSMUSG00000027185	98956	2	N-acetyltransferase 10 [Source:MGI Symbol;Acc:MGI:2138939]	7889	15.353	2.5447	0.371343	-1.65458	0.518773	1.13581	1.08158e-05	0.498505	0.00309942	0.346809	0.143959	8.86341e-05	0.668588	0.025173	0.634211	0.430813
Gpaa1	Gpaa1	ENSMUSG00000022561	14731	15	GPI anchor attachment protein 1 [Source:MGI Symbol;Acc:MGI:1202392]	6915	33.3061	2.54198	1.22044	-1.64854	-0.32699	1.97553	1.18588e-07	0.0083425	0.00038537	0.475769	0.00237397	1.61646e-06	0.0365093	0.00518826	0.73462	0.03353
Rps28	Rps28	ENSMUSG00000067288	54127	17	ribosomal protein S28 [Source:MGI Symbol;Acc:MGI:1859516]	10529	83.6899	2.54169	0.577791	-1.74826	0.215646	1.53261	0.0263156	0.599012	0.113966	0.845655	0.325109	0.062054	0.748561	0.286936	0.936931	0.63911
Zfp960	Zfp960	ENSMUSG00000096696	449000	17	zinc finger protein 960 [Source:MGI Symbol;Acc:MGI:3052731]	9592	27.9263	2.54161	2.8299	-1.03059	-1.31889	2.34948	0.00741508	0.00349923	0.253826	0.156035	0.0698508	0.0218849	0.0188534	0.467694	0.424851	0.29343
8030442B05Rik	8030442B05Rik	ENSMUSG00000102674		2	RIKEN cDNA 8030442B05 gene [Source:MGI Symbol;Acc:MGI:1924793]	10912	13.7365	2.53965	0.293118	-0.344986	1.90155	-1.55656	0.078089	0.822494	0.788862	0.18763	0.413153	0.148982	0.899421	0.887226	0.46959	0.71161
0610011F06Rik	0610011F06Rik					7446	77.9597	2.53865	-0.724942	-1.99524	1.26835	0.726898	1.78274e-06	0.151626	0.000125166	0.013222	0.307909	1.84047e-05	0.304824	0.00214409	0.0962978	0.620815
Mterf1a	Mterf1a	ENSMUSG00000040429	545725	5	mitochondrial transcription termination factor 1a [Source:MGI Symbol;Acc:MGI:1918240]	8869	36.2125	2.538	0.785886	-2.17575	-0.423632	2.59938	0.00734027	0.384836	0.0197325	0.638447	0.0438074	0.0217286	0.566901	0.0911346	0.843648	0.226324
Tada3	Tada3	ENSMUSG00000048930	101206	6	transcriptional adaptor 3 [Source:MGI Symbol;Acc:MGI:1915724]	7219	35.1211	2.53725	0.161246	-1.77709	0.598915	1.17818	2.06434e-07	0.727767	0.000180629	0.199002	0.0729431	2.66754e-06	0.840742	0.0028453	0.481837	0.300457
Ddx18	Ddx18	ENSMUSG00000001674	66942	1	DEAD (Asp-Glu-Ala-Asp) box polypeptide 18 [Source:MGI Symbol;Acc:MGI:1914192]	7881	26.6893	2.53603	0.888937	-1.59343	0.0536638	1.53976	6.02251e-06	0.0972716	0.00323782	0.920015	0.041689	5.31381e-05	0.223909	0.0258553	0.96894	0.219635
Ccrn4l	Ccrn4l					9672	9.28336	2.53309	-4.43993	-1.92859	5.04443	-3.11584	0.0348521	0.000591422	0.0990728	0.000155293	0.0579167	0.0778989	0.00470213	0.262688	0.00422304	0.264804
Ctc1	Ctc1	ENSMUSG00000020898	68964	11	CTS telomere maintenance complex component 1 [Source:MGI Symbol;Acc:MGI:1916214]	7947	13.5924	2.53015	-1.72582	-2.0596	2.19637	-0.136768	1.07024e-05	0.00199039	0.000259068	0.000110585	0.858782	8.79027e-05	0.0121626	0.00378121	0.00318136	0.948879
Zfp442	Zfp442	ENSMUSG00000068130	668923	2	zinc finger protein 442 [Source:MGI Symbol;Acc:MGI:3651999]	7038	23.9872	2.53	1.25812	-1.37207	-0.100196	1.47226	1.11161e-07	0.00617572	0.00271316	0.825745	0.0220414	1.52311e-06	0.0292011	0.0229747	0.92709	0.147645
Mrpl49	Mrpl49	ENSMUSG00000007338	18120	19	mitochondrial ribosomal protein L49 [Source:MGI Symbol;Acc:MGI:108180]	7992	32.1766	2.52888	0.705978	-1.58733	0.235572	1.35175	0.00972106	0.447856	0.0933929	0.799493	0.303946	0.0274127	0.624963	0.253626	0.915956	0.617495
Rfng	Rfng	ENSMUSG00000025158	19719	11	RFNG O-fucosylpeptide 3-beta-N-acetylglucosaminyltransferase [Source:MGI Symbol;Acc:MGI:894275]	8277	25.1872	2.52678	-1.87406	-1.8864	2.51444	-0.628032	0.000220833	0.0049516	0.00468546	0.000235802	0.493036	0.00116569	0.0247625	0.0338542	0.00580582	0.765633
Ltbp3	Ltbp3	ENSMUSG00000024940	16998	19	latent transforming growth factor beta binding protein 3 [Source:MGI Symbol;Acc:MGI:1101355]	9807	7.29177	2.52527	-1.51503	-2.04792	1.99238	0.0555358	0.0133567	0.12442	0.0407537	0.0469262	0.968132	0.0358039	0.26603	0.148476	0.212033	0.988378
Top1mt	Top1mt	ENSMUSG00000000934	72960	15	DNA topoisomerase 1, mitochondrial [Source:MGI Symbol;Acc:MGI:1920210]	6303	38.5569	2.52415	0.118668	-1.95418	0.451305	1.50288	3.18521e-07	0.799904	5.22531e-05	0.336833	0.0238786	3.89493e-06	0.885076	0.00103484	0.626371	0.155105
BC030499	BC030499	ENSMUSG00000037593		11	cDNA sequence BC030499 [Source:MGI Symbol;Acc:MGI:2652869]	10185	9.89856	2.52414	-0.462883	-1.45427	1.53276	-0.0784943	0.0363491	0.68518	0.209626	0.190444	0.960216	0.0808481	0.812054	0.419329	0.472596	0.985363
Fbxl21	Fbxl21	ENSMUSG00000035509	213311	13	F-box and leucine-rich repeat protein 21 [Source:MGI Symbol;Acc:MGI:2442921]	10615	12.1949	2.52217	-2.37481	-2.1819	2.71508	-0.533178	0.0610569	0.0746771	0.0994308	0.045144	0.768389	0.122946	0.186823	0.263025	0.207011	0.912238
Mrm1	Mrm1	ENSMUSG00000018405	217038	11	mitochondrial rRNA methyltransferase 1 [Source:MGI Symbol;Acc:MGI:2443470]	8560	21.872	2.52035	0.32793	-1.85174	0.340687	1.51105	0.000526616	0.634887	0.00897812	0.622714	0.123274	0.00242807	0.775745	0.0525422	0.835656	0.395314
Gm13157	Gm13157					7204	23.9056	2.51865	1.79104	-1.24371	-0.516099	1.75981	5.99633e-07	0.000290235	0.0100379	0.286315	0.00997903	6.98103e-06	0.00265067	0.0566705	0.580166	0.0880474
Rmi1	Rmi1	ENSMUSG00000035367	74386	13	RecQ mediated genome instability 1 [Source:MGI Symbol;Acc:MGI:1921636]	6003	20.9582	2.5157	0.358457	-1.92866	0.228583	1.70007	8.70237e-07	0.460409	0.000115324	0.63812	0.0137722	9.74736e-06	0.636732	0.00200972	0.843522	0.109816
Tysnd1	Tysnd1	ENSMUSG00000020087	71767	10	trypsin domain containing 1 [Source:MGI Symbol;Acc:MGI:1919017]	8013	23.821	2.51568	-2.3076	-2.14837	2.67491	-0.526545	2.15607e-05	8.3121e-05	0.000229678	7.12391e-06	0.507322	0.000160889	0.000957511	0.00343951	0.000357337	0.776752
Mterf1b	Mterf1b	ENSMUSG00000053178	208595	5	mitochondrial transcription termination factor 1b [Source:MGI Symbol;Acc:MGI:3704243]	10365	21.7893	2.51379	0.18916	-0.853779	1.47085	-0.617074	0.0565366	0.87911	0.493868	0.25049	0.725594	0.115525	0.934567	0.687066	0.542895	0.890049
Rnaseh2c	Rnaseh2c	ENSMUSG00000024925	68209	19	ribonuclease H2, subunit C [Source:MGI Symbol;Acc:MGI:1915459]	4781	134.957	2.51346	1.15454	-1.64273	-0.283812	1.92654	8.168e-12	0.00109838	4.00539e-06	0.418146	0.000108463	2.75594e-10	0.00766274	0.000123692	0.692182	0.00351483
Cln6	Cln6	ENSMUSG00000032245	76524	9	ceroid-lipofuscinosis, neuronal 6 [Source:MGI Symbol;Acc:MGI:2159324]	10660	9.89547	2.51253	-1.93217	-1.52665	2.91805	-1.39139	0.0496531	0.117323	0.211605	0.0243415	0.418318	0.104206	0.254832	0.421743	0.142681	0.715391
1700028E10Rik	1700028E10Rik	ENSMUSG00000097321		5	RIKEN cDNA 1700028E10 gene [Source:MGI Symbol;Acc:MGI:1916713]	10842	8.8564	2.51194	-0.569901	-1.52077	1.56108	-0.0403069	0.0360426	0.615585	0.179657	0.18978	0.973606	0.080297	0.761437	0.381847	0.472161	0.990827
Gnl3	Gnl3	ENSMUSG00000042354	30877	14	guanine nucleotide binding protein-like 3 (nucleolar) [Source:MGI Symbol;Acc:MGI:1353651]	6610	37.8447	2.50623	0.387969	-1.69078	0.427481	1.2633	6.8451e-08	0.379471	0.000175745	0.334518	0.0434447	9.93766e-07	0.561882	0.0027925	0.624159	0.225302
Hspa1a	Hspa1a	ENSMUSG00000091971	193740	17	heat shock protein 1A [Source:MGI Symbol;Acc:MGI:96244]	8362	19.8945	2.50273	1.06952	-1.59581	-0.162609	1.75842	7.88623e-05	0.0794384	0.00925559	0.788432	0.0404677	0.00047816	0.194365	0.0535922	0.911458	0.215444
Gorasp1	Gorasp1	ENSMUSG00000032513	74498	9	golgi reassembly stacking protein 1 [Source:MGI Symbol;Acc:MGI:1921748]	8370	15.6899	2.50167	-0.518637	-1.9644	1.0559	0.9085	0.000302861	0.430735	0.0037685	0.112271	0.329054	0.00151666	0.609631	0.0291226	0.352632	0.64236
Ppdpf	Ppdpf	ENSMUSG00000016344	66496	2	pancreatic progenitor cell differentiation and proliferation factor [Source:MGI Symbol;Acc:MGI:1913746]	6125	93.8001	2.50026	0.298689	-1.74621	0.455365	1.29084	2.09063e-10	0.424461	4.96534e-06	0.225439	0.014921	5.3776e-09	0.603173	0.000149124	0.515103	0.115757
Serpini1	Serpini1	ENSMUSG00000027834	20713	3	serine (or cysteine) peptidase inhibitor, clade I, member 1 [Source:MGI Symbol;Acc:MGI:1194506]	5689	25.1722	2.49939	0.441399	-1.87715	0.18084	1.69631	4.52267e-08	0.309824	2.61248e-05	0.677428	0.0059928	6.81956e-07	0.49503	0.000584042	0.861665	0.0633002
Mccc1os	Mccc1os	ENSMUSG00000086392		3	methylcrotonoyl-Coenzyme A carboxylase 1 (alpha), opposite strand [Source:MGI Symbol;Acc:MGI:3590669]	10231	4.93854	2.49903	-5.56167	-2.47004	5.59066	-3.12061	0.0380395	3.42691e-05	0.0396675	3.26499e-05	0.0629949	0.083908	0.00047005	0.145818	0.00124088	0.276682
Tmem220	Tmem220	ENSMUSG00000050270	338369	11	transmembrane protein 220 [Source:MGI Symbol;Acc:MGI:2443691]	10072	22.223	2.49874	0.30526	-1.22126	0.972224	0.249033	0.0278309	0.776757	0.261011	0.373284	0.871068	0.0648828	0.870031	0.476477	0.654909	0.952823
Fam203a	Fam203a					10696	10.8238	2.49861	0.377314	-0.752548	1.36875	-0.616204	0.065523	0.767739	0.554047	0.302001	0.732207	0.13	0.863538	0.732121	0.592573	0.893462
Glb1	Glb1	ENSMUSG00000045594	12091	9	galactosidase, beta 1 [Source:MGI Symbol;Acc:MGI:88151]	8591	21.6483	2.4965	-0.582112	-2.57956	0.499058	2.0805	0.0127445	0.541851	0.0103103	0.600651	0.125559	0.0344689	0.705257	0.0575946	0.82192	0.399362
Dlg3	Dlg3	ENSMUSG00000000881	53310	X	discs, large homolog 3 (Drosophila) [Source:MGI Symbol;Acc:MGI:1888986]	6996	13.3691	2.49457	0.655891	-1.48326	0.355423	1.12783	8.98356e-08	0.140412	0.00097831	0.425055	0.0727	1.25908e-06	0.289074	0.0107378	0.697702	0.299947
Sacs	Sacs	ENSMUSG00000048279	50720	14	sacsin [Source:MGI Symbol;Acc:MGI:1354724]	9566	7.66181	2.49258	-5.59205	-2.19088	5.89375	-3.70288	0.0341508	2.6364e-05	0.0586936	1.31064e-05	0.0231789	0.076692	0.000379724	0.189778	0.000584815	0.15283
Lrrc8a	Lrrc8a	ENSMUSG00000007476	241296	2	leucine rich repeat containing 8A [Source:MGI Symbol;Acc:MGI:2652847]	6983	15.4767	2.48814	-0.666031	-2.16166	0.992516	1.16914	0.000168978	0.290383	0.000933631	0.117312	0.188965	0.000924093	0.474439	0.0103899	0.36156	0.492476
Lyrm1	Lyrm1	ENSMUSG00000030922	73919	7	LYR motif containing 1 [Source:MGI Symbol;Acc:MGI:1921169]	8377	62.143	2.48316	0.975645	-1.62029	-0.112773	1.73306	0.000141722	0.119563	0.0103874	0.856488	0.0498432	0.00079697	0.258043	0.0578774	0.941468	0.244234
Gm7008	Gm7008	ENSMUSG00000035983		12	predicted gene 7008 [Source:MGI Symbol;Acc:MGI:3647211]	10663	36.9947	2.48117	-4.30954	-1.22519	5.56552	-4.34034	0.098614	0.00437719	0.379273	0.000671713	0.0355575	0.179585	0.0224233	0.594098	0.0123894	0.200948
Eps8	Eps8	ENSMUSG00000015766	13860	6	epidermal growth factor receptor pathway substrate 8 [Source:MGI Symbol;Acc:MGI:104684]	9822	8.78341	2.48081	2.43411	-1.21448	-1.16778	2.38226	0.0107268	0.0130687	0.192024	0.220084	0.0736341	0.0297931	0.0516323	0.398071	0.508122	0.30199
Tle2	Tle2	ENSMUSG00000034771	21886	10	transducin-like enhancer of split 2 [Source:MGI Symbol;Acc:MGI:104635]	8751	18.9358	2.47886	-1.18113	-2.13414	1.52585	0.608282	0.00143007	0.113937	0.00538174	0.0431565	0.560504	0.0055379	0.249689	0.0372598	0.201705	0.80873
Glb1l	Glb1l	ENSMUSG00000026200	74577	1	galactosidase, beta 1-like [Source:MGI Symbol;Acc:MGI:1921827]	9533	12.5444	2.47792	1.04615	-1.39087	0.0409091	1.34996	0.00634464	0.230573	0.111379	0.962411	0.271016	0.0193634	0.407338	0.2827	0.98578	0.586567
Spryd4	Spryd4	ENSMUSG00000051346	66701	10	SPRY domain containing 4 [Source:MGI Symbol;Acc:MGI:1913951]	8478	34.7583	2.47703	0.415328	-1.73273	0.328971	1.40376	0.000265995	0.520798	0.00872659	0.611906	0.125859	0.00135826	0.688269	0.0515014	0.829945	0.39979
2610507I01Rik	2610507I01Rik	ENSMUSG00000085882		11	RIKEN cDNA 2610507I01 gene [Source:MGI Symbol;Acc:MGI:1919453]	6785	23.4105	2.47629	0.289915	-1.54111	0.645269	0.89584	1.84593e-06	0.556475	0.00214671	0.193295	0.199452	1.89481e-05	0.716887	0.0194432	0.475281	0.506157
Praf2	Praf2	ENSMUSG00000031149	54637	X	PRA1 domain family 2 [Source:MGI Symbol;Acc:MGI:1859607]	5004	70.2493	2.46942	-0.0514439	-1.75869	0.762176	0.996512	1.03932e-14	0.865303	1.53042e-08	0.0127187	0.0204549	6.01155e-13	0.927583	1.07939e-06	0.0937589	0.140549
Nqo1	Nqo1	ENSMUSG00000003849	18104	8	NAD(P)H dehydrogenase, quinone 1 [Source:MGI Symbol;Acc:MGI:103187]	9953	22.4231	2.4648	-1.56361	-2.21808	1.81032	0.40776	0.0547997	0.209342	0.0808589	0.149453	0.813443	0.112671	0.38009	0.231158	0.414269	0.929832
Cln3	Cln3	ENSMUSG00000030720	12752	7	ceroid lipofuscinosis, neuronal 3, juvenile (Batten, Spielmeyer-Vogt disease) [Source:MGI Symbol;Acc:MGI:107537]	9523	16.8117	2.45987	-0.0985161	-1.20956	1.34882	-0.139266	0.0172817	0.919835	0.222144	0.177189	0.919472	0.0437727	0.957771	0.433585	0.454115	0.970706
Zbtb8a	Zbtb8a	ENSMUSG00000028807	73680	4	zinc finger and BTB domain containing 8a [Source:MGI Symbol;Acc:MGI:1920930]	9032	21.4551	2.45911	-1.52299	-1.6698	2.31231	-0.642512	0.0186627	0.132288	0.10024	0.0261778	0.646896	0.0467187	0.277348	0.264023	0.149283	0.853263
Tnpo2	Tnpo2	ENSMUSG00000031691	212999	8	transportin 2 (importin 3, karyopherin beta 2b) [Source:MGI Symbol;Acc:MGI:2384849]	4977	17.4289	2.45882	-0.494177	-2.00409	0.948901	1.05519	3.5542e-09	0.212435	9.76887e-07	0.0174857	0.0598281	6.88432e-08	0.384202	3.68253e-05	0.114258	0.269427
R3hdm4	R3hdm4	ENSMUSG00000035781	109284	10	R3H domain containing 4 [Source:MGI Symbol;Acc:MGI:1924814]	3262	57.9128	2.45613	0.485427	-1.68941	0.28129	1.40812	5.99795e-15	0.105177	3.43252e-08	0.347867	0.000911898	3.60273e-13	0.236779	2.20731e-06	0.634967	0.0168109
Phf11c	Phf11c	ENSMUSG00000091144	628705	14	PHD finger protein 11C [Source:MGI Symbol;Acc:MGI:3648476]	10246	18.3663	2.45314	0.368478	-1.47959	0.605071	0.874518	0.11453	0.803111	0.324613	0.683816	0.676617	0.202182	0.887547	0.54394	0.864705	0.867951
AI414108	AI414108					6527	14.6504	2.45273	-0.386876	-1.89513	0.944481	0.950648	2.30767e-08	0.354389	1.031e-05	0.0251044	0.107901	3.73187e-07	0.537558	0.000269639	0.145438	0.3685
Fxn	Fxn	ENSMUSG00000059363	14297	19	frataxin [Source:MGI Symbol;Acc:MGI:1096879]	10846	16.1289	2.4478	2.07339	-0.184687	0.189725	-0.00503771	0.0674261	0.116051	0.880399	0.888444	0.995877	0.132992	0.252873	0.938795	0.954653	0.998295
Mbnl3	Mbnl3	ENSMUSG00000036109	171170	X	muscleblind-like 3 (Drosophila) [Source:MGI Symbol;Acc:MGI:2444912]	10885	1.86743	2.44716	5.90564	-0.802764	-4.26125	5.06401	0.0611573	0.00143087	0.507435	0.0260092	0.0252359	0.12308	0.00947235	0.6977	0.148477	0.160488
Per1	Per1	ENSMUSG00000020893	18626	11	period circadian clock 1 [Source:MGI Symbol;Acc:MGI:1098283]	8923	10.6137	2.44583	-0.202887	-1.75619	0.892533	0.863656	0.00245061	0.79146	0.0256259	0.249353	0.427088	0.00874659	0.880008	0.109431	0.541578	0.723584
Rfc4	Rfc4	ENSMUSG00000022881	106344	16	replication factor C (activator 1) 4 [Source:MGI Symbol;Acc:MGI:2146571]	7930	47.7508	2.44207	0.368496	-1.53216	0.541408	0.990755	0.000806834	0.595044	0.0299815	0.43659	0.312872	0.0034671	0.745443	0.120744	0.70786	0.62663
Bex4	Bex4	ENSMUSG00000047844	406217	X	brain expressed X-linked 4 [Source:MGI Symbol;Acc:MGI:3606746]	9856	42.7287	2.44138	-2.9385	-1.96295	3.41693	-1.45399	0.0196667	0.00565143	0.0556666	0.00166705	0.303812	0.0487299	0.0272645	0.182637	0.0241007	0.617495
Timeless	Timeless	ENSMUSG00000039994	21853	10	timeless circadian clock 1 [Source:MGI Symbol;Acc:MGI:1321393]	10683	4.2024	2.43909	-1.39424	-1.14689	2.68643	-1.53954	0.108863	0.337344	0.427659	0.0798709	0.451454	0.194046	0.522654	0.634746	0.289937	0.739375
Focad	Focad	ENSMUSG00000038368	230393	4	focadhesin [Source:MGI Symbol;Acc:MGI:2676921]	5070	14.372	2.43845	-0.570485	-1.8344	1.17453	0.659868	9.63644e-13	0.0798042	3.96253e-08	0.000366956	0.151287	3.78941e-11	0.195085	2.48956e-06	0.00792798	0.441823
Fgf13	Fgf13	ENSMUSG00000031137	14168	X	fibroblast growth factor 13 [Source:MGI Symbol;Acc:MGI:109178]	10001	17.4328	2.43777	6.09155	-0.707798	-4.36158	5.06938	0.0310353	1.31332e-05	0.509656	0.00096235	0.00266076	0.0710307	0.00021492	0.699242	0.0161034	0.0365419
Tbc1d9	Tbc1d9	ENSMUSG00000031709	71310	8	TBC1 domain family, member 9 [Source:MGI Symbol;Acc:MGI:1918560]	10532	4.38819	2.43737	-4.73794	-3.00593	4.16938	-1.16344	0.0742617	0.00158998	0.0326779	0.00411615	0.543861	0.143509	0.0102305	0.127746	0.0454522	0.796956
Gpank1	Gpank1	ENSMUSG00000092417	81845	17	G patch domain and ankyrin repeats 1 [Source:MGI Symbol;Acc:MGI:2148975]	10400	11.5607	2.4357	-4.38193	-1.43355	5.38408	-3.95053	0.127304	0.00987968	0.348154	0.00267036	0.0744074	0.219786	0.0416524	0.565363	0.033211	0.303742
Muc1	Muc1	ENSMUSG00000042784	17829	3	mucin 1, transmembrane [Source:MGI Symbol;Acc:MGI:97231]	10342	11.3435	2.43448	3.01765	0.829536	0.246372	-1.07591	0.136911	0.0710191	0.593087	0.87535	0.62647	0.232445	0.179884	0.759433	0.948491	0.843758
Zkscan14	Zkscan14	ENSMUSG00000029627	67235	5	zinc finger with KRAB and SCAN domains 14 [Source:MGI Symbol;Acc:MGI:1914485]	7842	30.542	2.42926	1.44659	-1.62399	-0.641317	2.26531	6.36036e-05	0.014482	0.00592057	0.272523	0.00626835	0.000400296	0.0556865	0.0396834	0.565357	0.0653247
Coq9	Coq9	ENSMUSG00000031782	67914	8	coenzyme Q9 [Source:MGI Symbol;Acc:MGI:1915164]	5793	45.8205	2.42306	0.706111	-1.44373	0.273226	1.1705	1.10766e-11	0.0386397	2.79359e-05	0.42378	0.0151574	3.66939e-10	0.11627	0.00061014	0.69736	0.116773
Cdc25a	Cdc25a	ENSMUSG00000032477	12530	9	cell division cycle 25A [Source:MGI Symbol;Acc:MGI:103198]	10931	3.03412	2.42138	1.56375	-1.11776	-0.260129	1.37789	0.0866759	0.309922	0.370315	0.879353	0.541154	0.162139	0.495115	0.585715	0.950098	0.795188
Zc3h4	Zc3h4	ENSMUSG00000059273	330474	7	zinc finger CCCH-type containing 4 [Source:MGI Symbol;Acc:MGI:2682314]	4636	14.4742	2.41997	0.239703	-1.76398	0.416292	1.34769	4.7358e-06	0.633551	0.000638085	0.40866	0.0589875	4.31072e-05	0.774965	0.0077063	0.683831	0.267684
Ccdc149	Ccdc149	ENSMUSG00000045790	100503884	5	coiled-coil domain containing 149 [Source:MGI Symbol;Acc:MGI:2685293]	10104	10.6915	2.41925	2.40542	-1.05421	-1.04038	2.09459	0.0245984	0.0268579	0.305461	0.324102	0.155203	0.0586243	0.0882508	0.5242	0.612772	0.447128
2410016O06Rik	2410016O06Rik					9326	19.083	2.41875	-1.09941	-2.02732	1.49084	0.536485	0.00662447	0.199353	0.0208231	0.0851634	0.654981	0.0200661	0.367305	0.0947167	0.302351	0.857413
Ncln	Ncln	ENSMUSG00000020238	103425	10	nicalin [Source:MGI Symbol;Acc:MGI:1926081]	7932	20.7876	2.41842	0.0969663	-1.76762	0.553834	1.21379	4.13822e-05	0.862951	0.00213987	0.326842	0.12776	0.000276522	0.926334	0.0194432	0.616146	0.401921
Fbrs	Fbrs	ENSMUSG00000042423	14123	7	fibrosin [Source:MGI Symbol;Acc:MGI:104648]	7385	24.0406	2.41173	0.274128	-1.79292	0.344682	1.44824	0.00012057	0.646394	0.00345483	0.56489	0.0877844	0.000691173	0.784686	0.0272498	0.800017	0.332868
Gstm1	Gstm1	ENSMUSG00000058135	14862	3	glutathione S-transferase, mu 1 [Source:MGI Symbol;Acc:MGI:95860]	5324	62.8226	2.40867	0.621057	-1.50192	0.285689	1.21623	1.37201e-09	0.10207	9.6334e-05	0.451949	0.023512	2.92945e-08	0.231643	0.00172927	0.718222	0.15382
Rundc1	Rundc1	ENSMUSG00000035007	217201	11	RUN domain containing 1 [Source:MGI Symbol;Acc:MGI:2144506]	7047	20.7284	2.4071	0.774785	-1.66763	-0.0353098	1.70294	3.8192e-06	0.120988	0.00100761	0.943493	0.0159578	3.57156e-05	0.260345	0.0110151	0.978676	0.119863
Dnal4	Dnal4	ENSMUSG00000022420	54152	15	dynein, axonemal, light chain 4 [Source:MGI Symbol;Acc:MGI:1859217]	7967	38.7013	2.40668	-0.842779	-2.32904	0.920422	1.40862	0.00654113	0.320125	0.00829487	0.278316	0.238949	0.0198743	0.505286	0.0499313	0.571556	0.554451
Gpr61	Gpr61	ENSMUSG00000046793	229714	3	G protein-coupled receptor 61 [Source:MGI Symbol;Acc:MGI:2441719]	8796	13.7518	2.40599	-0.662816	-1.84758	1.22123	0.626343	0.00132219	0.354363	0.0117798	0.0917959	0.535148	0.00518444	0.537558	0.0633046	0.315174	0.792607
Fbxw4	Fbxw4	ENSMUSG00000040913	30838	19	F-box and WD-40 domain protein 4 [Source:MGI Symbol;Acc:MGI:1354698]	8991	25.3115	2.40259	1.62281	-1.3393	-0.559515	1.89882	0.00254988	0.0373657	0.0811345	0.465492	0.0797329	0.00904747	0.113436	0.231682	0.727107	0.315463
Zfand1	Zfand1	ENSMUSG00000039795	66361	3	zinc finger, AN1-type domain 1 [Source:MGI Symbol;Acc:MGI:1913611]	8476	33.9285	2.40172	-0.36099	-1.73909	1.02362	0.715472	0.000421823	0.577977	0.00887437	0.118794	0.43595	0.00201148	0.732149	0.0521024	0.364483	0.729833
Tmem203	Tmem203	ENSMUSG00000078201	227615	2	transmembrane protein 203 [Source:MGI Symbol;Acc:MGI:2443597]	9555	46.3496	2.39865	-0.424553	-1.72919	1.09402	0.635172	0.0116415	0.639416	0.0622278	0.233083	0.620505	0.031944	0.779449	0.196782	0.525425	0.841294
Ggt7	Ggt7	ENSMUSG00000027603	207182	2	gamma-glutamyltransferase 7 [Source:MGI Symbol;Acc:MGI:1913385]	8990	18.6865	2.39843	0.0307554	-2.00257	0.365104	1.63747	0.00882716	0.971889	0.0264401	0.676495	0.187216	0.025361	0.986016	0.111385	0.861461	0.490567
Slc2a8	Slc2a8	ENSMUSG00000026791	56017	2	solute carrier family 2, (facilitated glucose transporter), member 8 [Source:MGI Symbol;Acc:MGI:1860103]	9984	16.9293	2.39642	-1.1953	-2.23527	1.35645	0.878812	0.0550485	0.321451	0.0716474	0.262702	0.602513	0.113055	0.506247	0.214648	0.5554	0.830701
Npr1	Npr1	ENSMUSG00000027931	18160	3	natriuretic peptide receptor 1 [Source:MGI Symbol;Acc:MGI:97371]	9909	9.33839	2.39382	0.390612	-1.56177	0.441437	1.12034	0.0200326	0.691094	0.117786	0.654892	0.421324	0.0494461	0.81553	0.293045	0.852295	0.718242
Ddx11	Ddx11	ENSMUSG00000035842	320209	17	DEAD/H (Asp-Glu-Ala-Asp/His) box helicase 11 [Source:MGI Symbol;Acc:MGI:2443590]	10797	4.94207	2.39124	-0.27421	-1.95896	0.706495	1.25246	0.0426692	0.81115	0.0891886	0.544643	0.443426	0.0922098	0.891982	0.246215	0.784562	0.734462
Zfp212	Zfp212	ENSMUSG00000052763	232784	6	Zinc finger protein 212 [Source:MGI Symbol;Acc:MGI:2682609]	8498	19.3198	2.39009	-1.49601	-1.87394	2.01216	-0.138223	0.000299757	0.0196718	0.00382852	0.00205531	0.87634	0.0015025	0.0698901	0.0293802	0.028121	0.954484
Zfp516	Zfp516	ENSMUSG00000058881	329003	18	zinc finger protein 516 [Source:MGI Symbol;Acc:MGI:2443957]	7435	8.18736	2.38831	-0.0855336	-1.66643	0.807417	0.85901	1.15477e-05	0.868975	0.00167918	0.122712	0.242383	9.39981e-05	0.928953	0.0162305	0.371562	0.55802
Slc39a14	Slc39a14	ENSMUSG00000022094	213053	14	solute carrier family 39 (zinc transporter), member 14 [Source:MGI Symbol;Acc:MGI:2384851]	9490	8.91176	2.38677	0.643293	-1.5672	0.176275	1.39092	0.0105591	0.47183	0.0838116	0.843662	0.27148	0.0293944	0.645563	0.235959	0.935766	0.587106
Dnah7b	Dnah7b	ENSMUSG00000041144	227058	1	dynein, axonemal, heavy chain 7B [Source:MGI Symbol;Acc:MGI:2684953]	9918	2.99915	2.38568	2.28796	-0.434839	-0.337118	0.771956	0.0454995	0.0547066	0.700805	0.768851	0.631948	0.0971626	0.150416	0.83189	0.904448	0.847112
F8	F8	ENSMUSG00000031196	14069	X	coagulation factor VIII [Source:MGI Symbol;Acc:MGI:88383]	7569	8.28945	2.38404	-0.897662	-1.92276	1.35894	0.563825	1.04161e-05	0.0835674	0.000295656	0.00960951	0.439427	8.60032e-05	0.201535	0.00421324	0.0778756	0.731893
Tmem11	Tmem11	ENSMUSG00000043284	216821	11	transmembrane protein 11 [Source:MGI Symbol;Acc:MGI:2144726]	7355	42.2188	2.38078	-1.17508	-2.09729	1.45857	0.63871	2.77195e-05	0.0319797	0.000188725	0.00825977	0.404377	0.000197413	0.100374	0.00295024	0.0699425	0.704227
Acd	Acd	ENSMUSG00000038000	497652	8	adrenocortical dysplasia [Source:MGI Symbol;Acc:MGI:87873]	7721	42.387	2.37703	-0.726866	-2.07711	1.02678	1.05032	0.000588531	0.272286	0.00238131	0.123147	0.260854	0.00267185	0.45556	0.0208427	0.372176	0.576842
Polrmt	Polrmt	ENSMUSG00000020329	216151	10	polymerase (RNA) mitochondrial (DNA directed) [Source:MGI Symbol;Acc:MGI:1915843]	8866	13.6524	2.3761	0.404226	-1.70185	0.270031	1.43181	0.00139875	0.569654	0.0189964	0.704639	0.15556	0.00544361	0.726749	0.0888993	0.874268	0.447167
Uqcc2	Uqcc2	ENSMUSG00000024208	67267	17	ubiquinol-cytochrome c reductase complex assembly factor 2 [Source:MGI Symbol;Acc:MGI:1914517]	8360	115.308	2.37602	-0.727972	-1.67028	1.43371	0.236567	0.000197804	0.233051	0.00724443	0.0209317	0.78354	0.00105948	0.410061	0.0455674	0.129134	0.917066
Gm6251	Gm6251					9378	76.0073	2.37171	0.535501	-1.67066	0.165549	1.50511	0.00839149	0.534217	0.0568078	0.847683	0.217646	0.0243331	0.698823	0.185269	0.937943	0.529806
Selm	Selm					5357	94.0351	2.36997	1.12591	-1.36299	-0.118931	1.48192	1.61098e-13	0.000291336	1.11578e-05	0.699989	0.000677639	7.07276e-12	0.00265493	0.000289044	0.87271	0.0136426
Cutc	Cutc	ENSMUSG00000025193	66388	19	cutC copper transporter [Source:MGI Symbol;Acc:MGI:1913638]	9021	38.2431	2.36928	1.13006	-1.30906	-0.069846	1.37891	0.00328172	0.146731	0.0922596	0.927961	0.206884	0.0111415	0.297489	0.25158	0.97211	0.51495
Patz1	Patz1	ENSMUSG00000020453	56218	11	POZ (BTB) and AT hook containing zinc finger 1 [Source:MGI Symbol;Acc:MGI:1891832]	4303	49.0786	2.36842	0.200439	-1.65098	0.517001	1.13398	8.10773e-15	0.490778	2.77432e-08	0.0768881	0.00596077	4.79101e-13	0.66245	1.8161e-06	0.283297	0.0631425
Ubqln4	Ubqln4	ENSMUSG00000008604	94232	3	ubiquilin 4 [Source:MGI Symbol;Acc:MGI:2150152]	8017	16.9662	2.36396	-0.803165	-2.19544	0.971684	1.22376	0.00373459	0.304185	0.00671269	0.215357	0.267002	0.0124585	0.489094	0.043345	0.502087	0.582905
Impdh2	Impdh2	ENSMUSG00000062867	23918	9	inosine 5'-phosphate dehydrogenase 2 [Source:MGI Symbol;Acc:MGI:109367]	9117	29.5649	2.36134	-0.223883	-1.69531	0.889913	0.805396	0.00274197	0.765888	0.0275317	0.241242	0.449673	0.00961053	0.86263	0.114266	0.534183	0.738695
Cct6b	Cct6b	ENSMUSG00000020698	12467	11	chaperonin containing Tcp1, subunit 6b (zeta) [Source:MGI Symbol;Acc:MGI:1329013]	10899	7.28742	2.35852	-4.6604	-2.5256	4.49332	-1.96772	0.0853539	0.000683686	0.0683439	0.000933221	0.359823	0.160022	0.00530451	0.208613	0.0157662	0.670344
Adat1	Adat1	ENSMUSG00000031949	30947	8	adenosine deaminase, tRNA-specific 1 [Source:MGI Symbol;Acc:MGI:1353631]	9483	13.1939	2.35793	0.0240556	-1.30357	1.03031	0.273264	0.0337383	0.981843	0.224106	0.335889	0.855473	0.075945	0.990907	0.435523	0.625437	0.947575
Zbtb48	Zbtb48	ENSMUSG00000028952	100090	4	zinc finger and BTB domain containing 48 [Source:MGI Symbol;Acc:MGI:2140248]	10478	11.7182	2.35515	1.31833	-0.736308	0.300522	0.435786	0.0867536	0.322652	0.573378	0.820799	0.815608	0.162257	0.507276	0.746566	0.925412	0.930422
9130019O22Rik	9130019O22Rik	ENSMUSG00000030823	78921	7	RIKEN cDNA 9130019O22 gene [Source:MGI Symbol;Acc:MGI:1926171]	10066	7.48769	2.35466	-2.9373	-1.47256	3.81939	-2.34683	0.0583471	0.0199751	0.220815	0.00375065	0.166265	0.118586	0.0707076	0.431964	0.042498	0.463912
Rps21	Rps21	ENSMUSG00000039001	66481	2	ribosomal protein S21 [Source:MGI Symbol;Acc:MGI:1913731]	8075	150.339	2.3541	1.47618	-1.40088	-0.522962	1.92384	8.36889e-05	0.0115938	0.0155714	0.364807	0.0184131	0.000502134	0.046977	0.0768864	0.646932	0.131049
Cnnm3	Cnnm3	ENSMUSG00000001138	94218	1	cyclin M3 [Source:MGI Symbol;Acc:MGI:2151055]	5887	14.5488	2.34975	0.598302	-1.69647	0.0549766	1.64149	1.09944e-06	0.195164	0.000316985	0.905085	0.012157	1.20452e-05	0.361494	0.00447132	0.961554	0.100515
E2f6	E2f6	ENSMUSG00000057469	50496	12	E2F transcription factor 6 [Source:MGI Symbol;Acc:MGI:1354159]	8424	22.7554	2.34287	1.72458	-0.934039	-0.315743	1.24978	0.00293696	0.0256806	0.215963	0.676115	0.24163	0.0101379	0.0853833	0.42631	0.861456	0.557395
Polr2d	Polr2d	ENSMUSG00000024258	69241	18	polymerase (RNA) II (DNA directed) polypeptide D [Source:MGI Symbol;Acc:MGI:1916491]	6628	72.2994	2.33995	-1.18638	-2.01772	1.50861	0.509114	5.22212e-06	0.0167991	6.97472e-05	0.00258323	0.462717	4.69476e-05	0.0622957	0.00131916	0.032553	0.747513
Zdhhc16	Zdhhc16	ENSMUSG00000025157	74168	19	zinc finger, DHHC domain containing 16 [Source:MGI Symbol;Acc:MGI:1921418]	6855	36.7421	2.33584	0.201437	-1.49767	0.636732	0.860936	2.35916e-05	0.702327	0.00526744	0.229738	0.248853	0.000174024	0.823777	0.0366541	0.521198	0.563065
Plk2	Plk2	ENSMUSG00000021701	20620	13	polo-like kinase 2 [Source:MGI Symbol;Acc:MGI:1099790]	9572	13.5117	2.33562	1.84268	-0.74749	-0.254545	1.00204	0.104005	0.192379	0.586389	0.853054	0.606004	0.187219	0.358216	0.755235	0.940027	0.832579
Zfp954	Zfp954	ENSMUSG00000062116	232853	7	zinc finger protein 954 [Source:MGI Symbol;Acc:MGI:1917764]	9101	23.6553	2.33502	-0.625845	-1.98877	0.972102	1.01667	0.00553582	0.437757	0.0166496	0.231179	0.372268	0.0173353	0.615901	0.08122	0.522933	0.678045
Agtrap	Agtrap	ENSMUSG00000029007	11610	4	angiotensin II, type I receptor-associated protein [Source:MGI Symbol;Acc:MGI:1339977]	10596	5.31508	2.33343	7.61913	1.37923	-3.90647	2.52723	0.112928	0.00011723	0.323751	0.0340412	0.243584	0.199955	0.00127138	0.543479	0.174467	0.559587
Lrp10	Lrp10	ENSMUSG00000022175	65107	14	low-density lipoprotein receptor-related protein 10 [Source:MGI Symbol;Acc:MGI:1929480]	8969	15.6004	2.33046	-1.99058	-1.9466	2.37444	-0.427839	0.00211798	0.00779079	0.00915844	0.00177193	0.675856	0.00773596	0.0345653	0.0531259	0.0249945	0.867951
Prc1	Prc1	ENSMUSG00000038943	233406	7	protein regulator of cytokinesis 1 [Source:MGI Symbol;Acc:MGI:1858961]	10301	9.16523	2.32818	-0.120765	-2.97356	-0.524622	3.49819	0.160893	0.939649	0.0813154	0.74234	0.130179	0.263306	0.968897	0.23186	0.892918	0.40614
Tk2	Tk2	ENSMUSG00000035824	57813	8	thymidine kinase 2, mitochondrial [Source:MGI Symbol;Acc:MGI:1913266]	6980	27.3805	2.32697	0.466883	-1.7851	0.0749847	1.71012	0.0020928	0.518589	0.0161213	0.91733	0.0960326	0.00765934	0.686512	0.0792079	0.967697	0.348431
Ptprn	Ptprn	ENSMUSG00000026204	19275	1	protein tyrosine phosphatase, receptor type, N [Source:MGI Symbol;Acc:MGI:102765]	8551	15.2572	2.32052	2.87869	-1.01526	-1.57343	2.58869	0.000436582	2.38804e-05	0.108938	0.0163945	0.00449534	0.00207059	0.000349012	0.278837	0.110292	0.0522036
Rhebl1	Rhebl1	ENSMUSG00000023755	69159	15	Ras homolog enriched in brain like 1 [Source:MGI Symbol;Acc:MGI:1916409]	8363	45.5645	2.31847	2.15371	-1.22894	-1.06418	2.29311	0.00067269	0.0015927	0.0617927	0.109446	0.0142157	0.00297847	0.010242	0.196012	0.347866	0.112287
Ap4m1	Ap4m1	ENSMUSG00000019518	11781	5	adaptor-related protein complex AP-4, mu 1 [Source:MGI Symbol;Acc:MGI:1337063]	9799	23.1553	2.31826	2.23062	-1.30349	-1.21585	2.51934	0.019414	0.025471	0.173772	0.212442	0.0653682	0.0483008	0.0848154	0.373609	0.498684	0.282978
Myof	Myof	ENSMUSG00000048612	226101	19	myoferlin [Source:MGI Symbol;Acc:MGI:1919192]	9552	6.13615	2.31792	-0.265393	-1.72376	0.859556	0.864204	0.0117129	0.76267	0.055355	0.332395	0.487734	0.0320714	0.861035	0.18196	0.621578	0.763182
E330033B04Rik	E330033B04Rik					9695	5.73622	2.31702	-0.283264	-1.35399	1.2463	0.107685	0.0602299	0.809647	0.256822	0.297096	0.9488	0.121684	0.891166	0.471519	0.589453	0.98216
Oxnad1	Oxnad1	ENSMUSG00000021906	218885	14	oxidoreductase NAD-binding domain containing 1 [Source:MGI Symbol;Acc:MGI:1916953]	6933	33.1988	2.31386	0.593331	-1.5835	0.137033	1.44646	4.0961e-07	0.17625	0.000374782	0.754771	0.0198175	4.87784e-06	0.337142	0.00508327	0.899112	0.137291
Syn3	Syn3	ENSMUSG00000059602	27204	10	synapsin III [Source:MGI Symbol;Acc:MGI:1351334]	8332	6.37263	2.31325	1.6722	-1.25158	-0.61053	1.86211	0.00029759	0.00786756	0.0426543	0.323464	0.032926	0.00149395	0.0348091	0.153539	0.612419	0.190954
Mrpl57	Mrpl57	ENSMUSG00000021967	67840	14	mitochondrial ribosomal protein L57 [Source:MGI Symbol;Acc:MGI:1915090]	9885	12.7592	2.3126	-4.4097	-2.09787	4.62442	-2.52654	0.0309241	0.000142934	0.04792	8.10327e-05	0.0862447	0.0708281	0.00150246	0.165948	0.00249997	0.329342
Htatip2	Htatip2	ENSMUSG00000039745	53415	7	HIV-1 Tat interactive protein 2 [Source:MGI Symbol;Acc:MGI:1859271]	10194	24.2085	2.31258	-0.206	-2.05608	0.462502	1.59358	0.0476535	0.854074	0.075241	0.680671	0.31677	0.100822	0.920404	0.221409	0.86373	0.630311
Tbc1d20	Tbc1d20	ENSMUSG00000027465	67231	2	TBC1 domain family, member 20 [Source:MGI Symbol;Acc:MGI:1914481]	8840	26.7843	2.31216	0.674816	-1.44936	0.187987	1.26137	0.00184949	0.344134	0.0443663	0.791999	0.210738	0.0068841	0.529354	0.157472	0.912343	0.520043
Fam213b	Fam213b	ENSMUSG00000029059	66469	4	family with sequence similarity 213, member B [Source:MGI Symbol;Acc:MGI:1913719]	9484	52.5308	2.31134	-0.942517	-2.97794	0.275912	2.70203	0.0820297	0.462383	0.0292797	0.828126	0.139178	0.154917	0.638309	0.11877	0.927759	0.423412
Tulp3	Tulp3	ENSMUSG00000001521	22158	6	tubby-like protein 3 [Source:MGI Symbol;Acc:MGI:1329045]	5841	23.1897	2.31085	1.95503	-1.38213	-1.02631	2.40844	5.44533e-06	0.000104733	0.00504411	0.037322	0.000547625	4.87538e-05	0.00116355	0.0355298	0.185541	0.0116699
Snord64	Snord64	ENSMUSG00000077191		7	small nucleolar RNA, C/D box 64 [Source:MGI Symbol;Acc:MGI:3819546]	10880	368.64	2.31082	-0.378338	-1.2801	1.40905	-0.128953	0.0596439	0.745776	0.268827	0.25082	0.931831	0.120746	0.85147	0.483676	0.543077	0.976444
Dact3	Dact3	ENSMUSG00000078794	629378	7	dishevelled-binding antagonist of beta-catenin 3 [Source:MGI Symbol;Acc:MGI:3654828]	5949	26.8678	2.30461	-0.385205	-1.89149	0.798329	1.09316	4.97803e-06	0.424853	0.000142107	0.100096	0.109766	4.50123e-05	0.603338	0.0023612	0.330688	0.371275
Chrdl1	Chrdl1	ENSMUSG00000031283	83453	X	chordin-like 1 [Source:MGI Symbol;Acc:MGI:1933172]	9298	11.4492	2.30097	0.161381	-1.53755	0.602044	0.935504	0.00654899	0.841901	0.0619697	0.459671	0.414693	0.0198926	0.912247	0.196306	0.723685	0.712204
Clp1	Clp1	ENSMUSG00000027079	98985	2	CLP1, cleavage and polyadenylation factor I subunit [Source:MGI Symbol;Acc:MGI:2138968]	8597	29.0865	2.30069	1.48257	-1.1095	-0.29138	1.40088	0.00123289	0.033112	0.105585	0.670719	0.147833	0.00489749	0.102689	0.273325	0.858382	0.43714
Nqo2	Nqo2	ENSMUSG00000046949	18105	13	NAD(P)H dehydrogenase, quinone 2 [Source:MGI Symbol;Acc:MGI:104513]	9855	9.25016	2.29938	0.866523	-0.925153	0.507704	0.417449	0.104934	0.524928	0.496795	0.708966	0.827829	0.188271	0.691957	0.688946	0.876271	0.935972
Itpripl1	Itpripl1	ENSMUSG00000074825	73338	2	inositol 1,4,5-triphosphate receptor interacting protein-like 1 [Source:MGI Symbol;Acc:MGI:1920588]	10730	5.98461	2.29078	2.04606	-0.869809	-0.625084	1.49489	0.0507067	0.0854098	0.433041	0.599668	0.358941	0.105997	0.204311	0.639644	0.820986	0.669387
9130221H12Rik	9130221H12Rik	ENSMUSG00000090330		7	RIKEN cDNA 9130221H12 gene [Source:MGI Symbol;Acc:MGI:1924374]	9049	31.3429	2.2885	-0.548913	-2.02287	0.814537	1.20834	0.0112009	0.525822	0.0235294	0.348633	0.323679	0.0309214	0.692804	0.103344	0.635	0.637791
Sis	Sis	ENSMUSG00000027790	69983	3	sucrase isomaltase (alpha-glucosidase) [Source:MGI Symbol;Acc:MGI:1917233]	9413	7.47294	2.2881	-0.51231	-2.03411	0.7663	1.26781	0.0226615	0.594607	0.0407678	0.427917	0.352363	0.0548817	0.745014	0.148476	0.700239	0.662588
AI464131	AI464131	ENSMUSG00000046312	329828	4	expressed sequence AI464131 [Source:MGI Symbol;Acc:MGI:2140300]	5172	20.1047	2.28272	-0.361331	-1.7062	0.937851	0.768353	1.573e-10	0.289897	1.04623e-06	0.00649065	0.111656	4.13366e-09	0.473998	3.89028e-05	0.0610635	0.374194
Ssna1	Ssna1	ENSMUSG00000026966	68475	2	SS nuclear autoantigen 1 [Source:MGI Symbol;Acc:MGI:1915725]	3809	114.619	2.28145	1.16203	-1.34738	-0.227952	1.57533	3.50153e-26	2.98283e-08	1.07814e-10	0.273704	8.389e-08	9.56967e-24	1.05528e-06	1.43735e-08	0.566692	8.90374e-06
Rexo4	Rexo4	ENSMUSG00000052406		2	REX4, 3'-5' exonuclease [Source:MGI Symbol;Acc:MGI:2684957]	7609	27.3124	2.27925	0.656676	-1.57534	0.0472327	1.52811	0.000199222	0.264889	0.00842004	0.93596	0.0667588	0.00106551	0.447015	0.0503269	0.975676	0.286424
Vegfb	Vegfb	ENSMUSG00000024962	22340	19	vascular endothelial growth factor B [Source:MGI Symbol;Acc:MGI:106199]	8303	47.9732	2.27723	-0.0219702	-1.8308	0.468398	1.3624	0.000886028	0.973269	0.00659	0.476642	0.143336	0.00374993	0.986627	0.0427549	0.735448	0.429537
Mkl1	Mkl1	ENSMUSG00000042292	223701	15	MKL (megakaryoblastic leukemia)/myocardin-like 1 [Source:MGI Symbol;Acc:MGI:2384495]	9940	8.44634	2.26901	-0.737027	-1.59077	1.41527	0.175504	0.0268161	0.453787	0.111534	0.157226	0.899852	0.0629672	0.631097	0.282898	0.426818	0.962655
Phospho1	Phospho1	ENSMUSG00000050860	237928	11	phosphatase, orphan 1 [Source:MGI Symbol;Acc:MGI:2447348]	10196	17.4221	2.26589	-0.0769151	-1.31375	1.02906	0.28469	0.0387892	0.941491	0.215446	0.333627	0.848774	0.0853549	0.969763	0.425848	0.622922	0.944896
2900076A07Rik	2900076A07Rik	ENSMUSG00000097277		7	RIKEN cDNA 2900076A07 gene [Source:MGI Symbol;Acc:MGI:1920242]	7354	76.1748	2.26578	0.562521	-1.41615	0.287104	1.12905	2.14499e-06	0.220753	0.00228948	0.532588	0.0821033	2.16121e-05	0.394712	0.0203561	0.776016	0.319869
Iqcc	Iqcc	ENSMUSG00000040795	230767	4	IQ motif containing C [Source:MGI Symbol;Acc:MGI:2446212]	9037	22.6905	2.2647	-1.27186	-2.06022	1.47635	0.583873	0.00613366	0.112953	0.0119689	0.0674055	0.602012	0.0188457	0.248163	0.0641393	0.263097	0.830337
Pnmal2	Pnmal2	ENSMUSG00000070802	434128	7	PNMA-like 2 [Source:MGI Symbol;Acc:MGI:3645856]	5249	20.197	2.26228	1.28033	-1.41397	-0.432018	1.84599	6.86526e-12	6.88413e-05	1.01709e-05	0.175025	4.21844e-05	2.34534e-10	0.000818904	0.000266639	0.451481	0.00163532
Cox10	Cox10	ENSMUSG00000042148	70383	11	cytochrome c oxidase assembly protein 10 [Source:MGI Symbol;Acc:MGI:1917633]	7678	21.2274	2.26019	0.820668	-1.40881	0.0307145	1.37809	2.67082e-05	0.114008	0.00704456	0.952694	0.0598749	0.000191712	0.249767	0.0447	0.98343	0.269474
Grik5	Grik5	ENSMUSG00000003378	14809	7	glutamate receptor, ionotropic, kainate 5 (gamma 2) [Source:MGI Symbol;Acc:MGI:95818]	8298	14.8329	2.25881	0.397644	-1.61803	0.243129	1.3749	0.000361157	0.513007	0.00895441	0.689658	0.110557	0.00175709	0.681177	0.0524702	0.867089	0.372825
Rrp1b	Rrp1b	ENSMUSG00000058392	72462	17	ribosomal RNA processing 1 homolog B (S. cerevisiae) [Source:MGI Symbol;Acc:MGI:1919712]	7806	11.9049	2.25873	-2.16116	-1.92176	2.49813	-0.57637	5.3024e-05	0.000101023	0.000493317	9.32493e-06	0.446117	0.000343196	0.00113429	0.00626358	0.000437511	0.736143
Atxn7l1	Atxn7l1	ENSMUSG00000020564	380753	12	ataxin 7-like 1 [Source:MGI Symbol;Acc:MGI:3584458]	5527	47.0243	2.25753	1.68074	-1.25655	-0.67976	1.93631	8.824e-10	3.69419e-06	0.000423842	0.056835	0.000122234	1.97672e-08	7.38674e-05	0.00560887	0.239984	0.00380264
Rfxap	Rfxap	ENSMUSG00000036615	170767	3	regulatory factor X-associated protein [Source:MGI Symbol;Acc:MGI:2180854]	7739	28.1801	2.25428	0.448536	-1.36389	0.441858	0.922027	8.0707e-05	0.413436	0.0139934	0.421867	0.2346	0.000487452	0.593597	0.07136	0.695476	0.548236
Tfe3	Tfe3	ENSMUSG00000000134	209446	X	transcription factor E3 [Source:MGI Symbol;Acc:MGI:98511]	6630	20.6969	2.25192	-0.270203	-1.77133	0.750797	1.02053	1.4181e-06	0.545867	0.000113344	0.0954371	0.107326	1.49746e-05	0.707626	0.0019857	0.322111	0.367686
Acrbp	Acrbp	ENSMUSG00000072770	54137	6	proacrosin binding protein [Source:MGI Symbol;Acc:MGI:1859515]	8837	26.4002	2.25188	1.98731	-1.09885	-0.834289	1.93314	0.00592471	0.0146801	0.163958	0.293623	0.084291	0.0183222	0.0562309	0.360519	0.586174	0.325148
Arid3b	Arid3b	ENSMUSG00000004661	56380	9	AT rich interactive domain 3B (BRIGHT-like) [Source:MGI Symbol;Acc:MGI:1930768]	8594	14.1037	2.24835	1.53042	-1.01142	-0.293489	1.30491	0.00196065	0.0315124	0.148024	0.674987	0.18669	0.00723371	0.0992778	0.339316	0.86062	0.490246
Slc7a1	Slc7a1	ENSMUSG00000041313	11987	5	solute carrier family 7 (cationic amino acid transporter, y+ system), member 1 [Source:MGI Symbol;Acc:MGI:88117]	8683	6.06279	2.24757	-3.91941	-2.27768	3.88929	-1.61161	0.00344162	1.82488e-06	0.00305744	2.12547e-06	0.124152	0.011623	3.96611e-05	0.0249247	0.000135091	0.397083
Hdac5	Hdac5	ENSMUSG00000008855	15184	11	histone deacetylase 5 [Source:MGI Symbol;Acc:MGI:1333784]	3774	26.2401	2.24627	0.418342	-1.50917	0.318752	1.19042	3.41123e-23	0.0544873	7.92569e-12	0.144042	0.00011085	7.17146e-21	0.150018	1.52006e-09	0.406427	0.00355369
Rpl28	Rpl28	ENSMUSG00000030432	19943	7	ribosomal protein L28 [Source:MGI Symbol;Acc:MGI:101839]	9370	89.8873	2.24369	-0.0263517	-1.48606	0.78398	0.70208	0.013248	0.975749	0.0921665	0.369964	0.567735	0.035584	0.987727	0.251451	0.651605	0.812553
Arid3a	Arid3a	ENSMUSG00000019564	13496	10	AT rich interactive domain 3A (BRIGHT-like) [Source:MGI Symbol;Acc:MGI:1328360]	10241	5.50672	2.2426	0.417163	-0.62819	1.19725	-0.569056	0.111093	0.75648	0.640531	0.381659	0.764406	0.197346	0.856978	0.791756	0.662346	0.91059
Chtf18	Chtf18	ENSMUSG00000019214	214901	17	CTF18, chromosome transmission fidelity factor 18 [Source:MGI Symbol;Acc:MGI:2384887]	10910	5.28181	2.23823	0.906902	-0.758852	0.572475	0.186377	0.0788452	0.462675	0.519078	0.661153	0.922627	0.150165	0.63847	0.706383	0.854194	0.97216
Naa20	Naa20	ENSMUSG00000002728	67877	2	N(alpha)-acetyltransferase 20, NatB catalytic subunit [Source:MGI Symbol;Acc:MGI:1915127]	6875	58.4649	2.23496	0.629917	-1.57457	0.0304685	1.5441	2.61821e-05	0.218287	0.00244402	0.952431	0.0330366	0.000189051	0.391584	0.0212723	0.98343	0.191305
A930013F10Rik	A930013F10Rik					9424	18.0343	2.23004	0.584154	-1.3204	0.325486	0.994918	0.0222042	0.533169	0.162968	0.728603	0.452699	0.0539533	0.698037	0.359313	0.886685	0.739525
Nubpl	Nubpl	ENSMUSG00000035142	76826	12	nucleotide binding protein-like [Source:MGI Symbol;Acc:MGI:1924076]	9511	35.7427	2.22925	-1.52946	-1.99368	1.76503	0.228645	0.0154907	0.0894692	0.0288978	0.0518545	0.854847	0.0401575	0.211202	0.117965	0.225486	0.947461
G6pd2	G6pd2	ENSMUSG00000089992	14380	5	glucose-6-phosphate dehydrogenase 2 [Source:MGI Symbol;Acc:MGI:105977]	10862	11.4322	2.21981	2.76637	-0.776829	-1.32339	2.10022	0.0627502	0.0324767	0.486962	0.315174	0.223617	0.1255	0.101294	0.681971	0.604079	0.537626
Ggcx	Ggcx	ENSMUSG00000053460;ENSMUSG00000103019	56316	6	gamma-glutamyl carboxylase [Source:MGI Symbol;Acc:MGI:1927655]	8177	17.1562	2.21775	-0.942123	-1.88424	1.27564	0.608593	0.000469918	0.124074	0.00262429	0.0388883	0.479336	0.00220478	0.265502	0.0223956	0.190469	0.758304
C330013E15Rik	C330013E15Rik	ENSMUSG00000097093		15	RIKEN cDNA C330013E15 gene [Source:MGI Symbol;Acc:MGI:1925695]	10633	19.9262	2.21755	-3.10585	-0.959303	4.36409	-3.40479	0.140338	0.0397135	0.501235	0.00696999	0.100417	0.236902	0.11888	0.692556	0.064138	0.355904
Rps15a-ps4	Rps15a-ps4	ENSMUSG00000083757		4	ribosomal protein S15A, pseudogene 4 [Source:MGI Symbol;Acc:MGI:3652187]	10888	24.762	2.21735	3.30844	-0.532158	-1.62325	2.1554	0.0702499	0.0164203	0.638436	0.253412	0.233327	0.137237	0.0613069	0.790327	0.545872	0.546911
Zfp583	Zfp583	ENSMUSG00000030443	213011	7	zinc finger protein 583 [Source:MGI Symbol;Acc:MGI:2682297]	7501	23.0334	2.21685	1.41995	-1.26651	-0.469601	1.73611	2.5062e-05	0.00587087	0.0130191	0.356103	0.0158127	0.000182277	0.0280877	0.0677737	0.640705	0.119848
Trim25	Trim25	ENSMUSG00000000275	217069	11	tripartite motif-containing 25 [Source:MGI Symbol;Acc:MGI:102749]	9221	8.32398	2.21181	-0.943179	-1.66526	1.48973	0.175531	0.00639887	0.228398	0.0362743	0.0607579	0.873447	0.0194962	0.404609	0.136506	0.248973	0.953177
Eme2	Eme2	ENSMUSG00000073436	193838	17	essential meiotic structure-specific endonuclease subunit 2 [Source:MGI Symbol;Acc:MGI:1919889]	9297	28.7342	2.19396	0.613051	-1.47018	0.11073	1.35945	0.0599246	0.584948	0.196659	0.921252	0.392124	0.121247	0.737056	0.403128	0.969216	0.694174
2810013P06Rik	2810013P06Rik	ENSMUSG00000099881		8	RIKEN cDNA 2810013P06 gene [Source:MGI Symbol;Acc:MGI:1914456]	7017	32.8566	2.19234	-0.530961	-1.88718	0.836128	1.05105	0.000241473	0.355146	0.00139694	0.147328	0.195491	0.00125168	0.538184	0.0140749	0.410923	0.501795
Dnase2a	Dnase2a	ENSMUSG00000003812	13423	8	deoxyribonuclease II alpha [Source:MGI Symbol;Acc:MGI:1329019]	10848	8.50206	2.19166	-3.7057	-1.67338	4.22397	-2.55059	0.117124	0.00769795	0.213661	0.00346486	0.190494	0.205752	0.0343066	0.424013	0.0400823	0.495014
B230217C12Rik	B230217C12Rik	ENSMUSG00000050538	68127	11	RIKEN cDNA B230217C12 gene [Source:MGI Symbol;Acc:MGI:1915377]	8532	45.281	2.19103	0.0801885	-1.61414	0.496701	1.11743	0.00383117	0.912167	0.0297579	0.49622	0.278446	0.012738	0.953784	0.120174	0.751237	0.594442
Abcd1	Abcd1	ENSMUSG00000031378	11666	X	ATP-binding cassette, sub-family D (ALD), member 1 [Source:MGI Symbol;Acc:MGI:1349215]	6477	20.7112	2.19066	-1.11191	-1.8104	1.49216	0.318245	2.91194e-06	0.0143414	8.88933e-05	0.00114501	0.616462	2.82211e-05	0.0552627	0.00161694	0.0183269	0.839172
BC037704	BC037704					9941	18.0925	2.19028	6.47783	0.00451421	-4.28304	4.27852	0.04149	1.8769e-06	0.996481	0.000706893	0.00751828	0.0900473	4.055e-05	0.998215	0.0128458	0.0734494
Dio2	Dio2	ENSMUSG00000007682	13371	12	deiodinase, iodothyronine, type II [Source:MGI Symbol;Acc:MGI:1338833]	9159	8.26775	2.18956	1.99207	-1.11544	-0.917952	2.03339	0.00634672	0.0129678	0.150459	0.241534	0.0651754	0.0193643	0.0513451	0.342741	0.534396	0.282552
Myh10	Myh10	ENSMUSG00000020900	77579	11	myosin, heavy polypeptide 10, non-muscle [Source:MGI Symbol;Acc:MGI:1930780]	9447	5.48735	2.18929	-0.67105	-1.36879	1.49155	-0.122755	0.0179084	0.450283	0.128101	0.0997772	0.921606	0.0451302	0.627469	0.308234	0.329735	0.971783
Fbxo48	Fbxo48	ENSMUSG00000044966	319701	11	F-box protein 48 [Source:MGI Symbol;Acc:MGI:2442569]	8686	23.9966	2.18462	1.21458	0.0621083	1.03214	-1.09425	0.0540734	0.269738	0.954312	0.347692	0.477367	0.111429	0.452861	0.975416	0.634967	0.756905
Ncan	Ncan	ENSMUSG00000002341	13004	8	neurocan [Source:MGI Symbol;Acc:MGI:104694]	8061	8.23723	2.18191	2.12635	-1.34706	-1.2915	2.63856	0.00271587	0.0036004	0.0572456	0.0706729	0.00873136	0.00953431	0.0192845	0.186308	0.269741	0.0814579
Ccbl2	Ccbl2					8734	22.8235	2.18095	1.76284	-0.897651	-0.479539	1.37719	0.00440684	0.01999	0.223707	0.517712	0.187753	0.0142827	0.0707219	0.435076	0.766976	0.490954
Wibg	Wibg					9135	36.5596	2.18081	-0.435647	-1.69976	0.91669	0.783071	0.00669004	0.573074	0.0315188	0.239522	0.473929	0.0202367	0.728886	0.125114	0.533313	0.754257
Zfp13	Zfp13	ENSMUSG00000062012	22654	17	zinc finger protein 13 [Source:MGI Symbol;Acc:MGI:99159]	9120	21.9171	2.17881	2.96585	-0.9022	-1.68924	2.59144	0.0204884	0.00238829	0.31945	0.0712579	0.0464818	0.0503889	0.0139396	0.538509	0.270859	0.233759
Lrrc16b	Lrrc16b					9018	10.8379	2.17451	0.332085	-1.25694	0.585489	0.671449	0.00718717	0.669055	0.109507	0.453479	0.541433	0.0213738	0.802149	0.279662	0.71899	0.795374
Them6	Them6	ENSMUSG00000056665	223626	15	thioesterase superfamily member 6 [Source:MGI Symbol;Acc:MGI:1925301]	10503	17.7026	2.17294	1.37675	-0.657838	0.138356	0.519481	0.0963584	0.281465	0.598495	0.91328	0.771108	0.176359	0.465646	0.763716	0.965116	0.912238
Ermard	Ermard	ENSMUSG00000036552	381062;100041574;100041621	17	ER membrane associated RNA degradation [Source:MGI Symbol;Acc:MGI:1917317]	7702	24.7929	2.16928	0.963071	-1.53301	-0.326805	1.85982	0.000228759	0.0920645	0.00779179	0.565403	0.0211511	0.00120346	0.215514	0.0478539	0.800128	0.143261
Gt(ROSA)26Sor	Gt(ROSA)26Sor	ENSMUSG00000086429		6	gene trap ROSA 26, Philippe Soriano [Source:MGI Symbol;Acc:MGI:104735]	7627	95.4994	2.16853	0.814268	0.808918	2.16318	-2.9721	0.10148	0.523202	0.525884	0.102271	0.104615	0.183459	0.690444	0.711858	0.334574	0.363508
Rhoc	Rhoc	ENSMUSG00000002233	11853	3	ras homolog family member C [Source:MGI Symbol;Acc:MGI:106028]	8198	55.0578	2.16656	0.129166	-1.64757	0.389825	1.25774	0.00117665	0.84047	0.0119958	0.544752	0.167109	0.00472389	0.911334	0.0642203	0.784616	0.465081
Rrp36	Rrp36	ENSMUSG00000023971	224823	17	ribosomal RNA processing 36 homolog (S. cerevisiae) [Source:MGI Symbol;Acc:MGI:2385053]	8661	44.4991	2.16602	-0.340773	-1.73116	0.775634	0.95553	0.00235311	0.618686	0.0135453	0.260294	0.324278	0.00847026	0.764234	0.0697493	0.553386	0.638403
Slbp	Slbp	ENSMUSG00000004642	20492	5	stem-loop binding protein [Source:MGI Symbol;Acc:MGI:108402]	7413	35.1849	2.16534	0.689112	-1.39612	0.0801104	1.31601	8.30116e-06	0.142158	0.00318878	0.864352	0.0471817	7.04568e-05	0.291242	0.0256134	0.944164	0.235521
Hhatl	Hhatl	ENSMUSG00000032523	74770	9	hedgehog acyltransferase-like [Source:MGI Symbol;Acc:MGI:1922020]	8474	29.2315	2.16506	0.271137	-1.46375	0.43018	1.03357	0.00183425	0.684757	0.0310201	0.520951	0.274672	0.00682969	0.811993	0.123944	0.768871	0.590621
Lmo7	Lmo7	ENSMUSG00000033060	380928	14	LIM domain only 7 [Source:MGI Symbol;Acc:MGI:1353586]	8883	8.02945	2.16442	-1.88999	-1.96686	2.08755	-0.120684	0.00350131	0.0100217	0.00749939	0.00475759	0.904461	0.0117908	0.0420485	0.0465815	0.0502997	0.964359
Fam89b	Fam89b	ENSMUSG00000024939	17826	19	family with sequence similarity 89, member B [Source:MGI Symbol;Acc:MGI:106595]	9189	41.2604	2.16366	1.52271	-1.38378	-0.742823	2.1266	0.0111531	0.0698889	0.0958517	0.370303	0.0697951	0.0308282	0.178136	0.257331	0.651778	0.29343
Tapbpl	Tapbpl	ENSMUSG00000038213	213233	6	TAP binding protein-like [Source:MGI Symbol;Acc:MGI:2384853]	10554	10.8253	2.16351	-2.23897	-0.31784	4.08464	-3.7668	0.140427	0.118421	0.818262	0.00928491	0.0638361	0.237015	0.256251	0.903925	0.075975	0.279478
Pigh	Pigh	ENSMUSG00000021120	110417	12	phosphatidylinositol glycan anchor biosynthesis, class H [Source:MGI Symbol;Acc:MGI:99463]	7548	26.865	2.16205	-0.446023	-1.57017	1.0379	0.532268	3.2494e-05	0.372617	0.00206557	0.0400947	0.451592	0.00022563	0.556051	0.0189119	0.194117	0.739375
Mafk	Mafk	ENSMUSG00000018143	17135	5	v-maf musculoaponeurotic fibrosarcoma oncogene family, protein K (avian) [Source:MGI Symbol;Acc:MGI:99951]	8660	18.2697	2.16135	-1.03594	-1.97073	1.22656	0.744172	0.0120742	0.214677	0.0211782	0.143639	0.524971	0.032911	0.386885	0.0956489	0.405856	0.786792
Rad51d	Rad51d	ENSMUSG00000018841	19364	11	RAD51 paralog D [Source:MGI Symbol;Acc:MGI:1261809]	4446	53.451	2.15874	0.873479	-1.42871	-0.14344	1.57215	9.60586e-11	0.00685607	1.14322e-05	0.655438	0.00056213	2.68571e-09	0.0315183	0.000294063	0.852498	0.0118405
Plcb3	Plcb3	ENSMUSG00000024960	18797	19	phospholipase C, beta 3 [Source:MGI Symbol;Acc:MGI:104778]	10753	5.24194	2.15575	0.0516479	-1.49739	0.606705	0.890689	0.0788598	0.965373	0.208977	0.615662	0.599414	0.150165	0.982023	0.418337	0.832663	0.829302
Phykpl	Phykpl	ENSMUSG00000020359	72947	11	5-phosphohydroxy-L-lysine phospholyase [Source:MGI Symbol;Acc:MGI:1920197]	10174	16.9538	2.15236	-1.78012	-1.77878	2.1537	-0.374915	0.0574182	0.110922	0.111114	0.0573151	0.807293	0.116976	0.245147	0.282423	0.241197	0.926836
Zak	Zak					8291	9.0618	2.15093	-7.09548	-2.36936	6.87705	-4.50769	0.0111141	4.27476e-12	0.00565244	1.13158e-11	0.000189293	0.0307282	3.62261e-10	0.0383804	2.57717e-09	0.00536102
Gm15706	Gm15706	ENSMUSG00000086013		6	predicted gene 15706 [Source:MGI Symbol;Acc:MGI:3783146]	10905	17.7901	2.14758	-0.142464	-1.05038	1.23967	-0.189293	0.0876619	0.905461	0.373834	0.327614	0.905477	0.163584	0.9505	0.589046	0.61707	0.964783
Acot8	Acot8	ENSMUSG00000017307	170789	2	acyl-CoA thioesterase 8 [Source:MGI Symbol;Acc:MGI:2158201]	8816	32.9693	2.14567	-4.03419	-1.67524	4.50461	-2.82937	0.0216375	5.98577e-05	0.0679397	1.20815e-05	0.0284108	0.0527877	0.000737212	0.207695	0.000550312	0.173512
Wbscr27	Wbscr27	ENSMUSG00000040557	79565	5	Williams Beuren syndrome chromosome region 27 (human) [Source:MGI Symbol;Acc:MGI:1933146]	9655	14.412	2.14428	-1.49134	-1.659	1.97662	-0.317625	0.0211954	0.101393	0.0695626	0.0327395	0.801318	0.0518119	0.23073	0.210652	0.170758	0.923759
Tmem8	Tmem8	ENSMUSG00000024180	60455	17	transmembrane protein 8 (five membrane-spanning domains) [Source:MGI Symbol;Acc:MGI:1926283]	10661	6.0695	2.14326	-1.347	-1.14845	2.34181	-1.19337	0.106338	0.293237	0.368339	0.0794211	0.5076	0.190399	0.477603	0.584578	0.288737	0.776752
Fam228b	Fam228b	ENSMUSG00000050545	207921	12	family with sequence similarity 228, member B [Source:MGI Symbol;Acc:MGI:2442121]	6914	23.8254	2.14204	0.53423	-1.31345	0.294368	1.01908	1.12133e-06	0.208017	0.00215579	0.488509	0.0892614	1.22461e-05	0.378209	0.0195092	0.744853	0.33505
Prkag2	Prkag2	ENSMUSG00000028944	108099	5	protein kinase, AMP-activated, gamma 2 non-catalytic subunit [Source:MGI Symbol;Acc:MGI:1336153]	9124	20.0046	2.14118	0.800864	-1.19501	0.145299	1.04972	0.0653903	0.475695	0.28985	0.89658	0.507147	0.129783	0.648578	0.50692	0.957884	0.776752
Slitrk5	Slitrk5	ENSMUSG00000033214	75409	14	SLIT and NTRK-like family, member 5 [Source:MGI Symbol;Acc:MGI:2679448]	5515	16.8288	2.14037	0.728097	-1.41838	-0.00611467	1.4245	5.21078e-08	0.055492	0.00022051	0.987132	0.00799828	7.76079e-07	0.152002	0.00333418	0.995573	0.0766993
Npm3-ps1	Npm3-ps1	ENSMUSG00000081669		6	nucleoplasmin 3, pseudogene 1 [Source:MGI Symbol;Acc:MGI:894683]	10029	36.5524	2.13734	0.182311	-1.61699	0.338037	1.27895	0.0608227	0.868117	0.148579	0.758913	0.411766	0.122632	0.928688	0.340017	0.900492	0.710796
Ccs	Ccs	ENSMUSG00000034108	12460	19	copper chaperone for superoxide dismutase [Source:MGI Symbol;Acc:MGI:1333783]	4151	90.4997	2.13386	0.805137	-1.37672	-0.0479979	1.42472	6.97974e-14	0.00353779	7.33016e-07	0.861474	0.000254164	3.33199e-12	0.019021	2.87233e-05	0.942706	0.00671139
Lactb2	Lactb2	ENSMUSG00000025937	212442	1	lactamase, beta 2 [Source:MGI Symbol;Acc:MGI:2442551]	6708	36.8601	2.13135	-0.633036	-1.72427	1.04012	0.684149	1.753e-05	0.186017	0.000424644	0.0310797	0.310985	0.000136203	0.349225	0.00560887	0.166096	0.624483
Selo	Selo					6027	32.1368	2.13051	-0.0268012	-1.46377	0.693539	0.770234	1.21326e-08	0.940566	6.21989e-05	0.055462	0.130316	2.09398e-07	0.969379	0.00119711	0.235866	0.406452
Etohd2	Etohd2	ENSMUSG00000089875		13	ethanol decreased 2 [Source:MGI Symbol;Acc:MGI:1261417]	9955	11.2465	2.12814	0.880516	-2.61654	-1.36892	3.98545	0.135042	0.526022	0.0714169	0.328464	0.0475781	0.230309	0.692828	0.214251	0.617713	0.237067
Ntpcr	Ntpcr	ENSMUSG00000031851	66566	8	nucleoside-triphosphatase, cancer-related [Source:MGI Symbol;Acc:MGI:1913816]	8335	48.9539	2.12505	0.145682	-1.62594	0.353432	1.27251	0.00131823	0.819075	0.0124049	0.580026	0.159025	0.00517446	0.897028	0.0656978	0.810228	0.452658
Hdac1	Hdac1	ENSMUSG00000028800	433759	4	histone deacetylase 1 [Source:MGI Symbol;Acc:MGI:108086]	5475	41.5921	2.12458	0.985751	-1.30095	-0.162128	1.46308	5.05185e-11	0.00173786	3.59077e-05	0.604631	0.000950291	1.50073e-09	0.0109123	0.000748192	0.825237	0.0172896
Luzp1	Luzp1	ENSMUSG00000001089	269593	4	leucine zipper protein 1 [Source:MGI Symbol;Acc:MGI:107629]	6416	9.43919	2.12178	-0.000491916	-1.5272	0.595068	0.932135	0.00132215	0.999382	0.0184398	0.350581	0.300086	0.00518444	0.999656	0.0869265	0.636153	0.615092
Pdrg1	Pdrg1	ENSMUSG00000027472	68559	2	p53 and DNA damage regulated 1 [Source:MGI Symbol;Acc:MGI:1915809]	3491	84.5292	2.11937	0.690412	-1.46542	-0.0364618	1.50188	4.04731e-14	0.0108818	9.26867e-08	0.892724	8.95869e-05	2.06753e-12	0.0447555	5.1434e-06	0.95576	0.00296927
Nadk	Nadk	ENSMUSG00000029063	192185	4	NAD kinase [Source:MGI Symbol;Acc:MGI:2183149]	5222	28.3189	2.11904	-0.0752621	-1.65128	0.543023	1.10825	4.0594e-06	0.864796	0.000263878	0.221008	0.077038	3.75761e-05	0.927312	0.00383096	0.509289	0.309818
1500015A07Rik	1500015A07Rik	ENSMUSG00000098702		18	RIKEN cDNA 1500015A07 gene [Source:MGI Symbol;Acc:MGI:1916232]	9718	22.4929	2.11716	0.315839	-1.58848	0.21284	1.37564	0.0379584	0.748158	0.112806	0.828971	0.324235	0.0838239	0.852423	0.285112	0.92794	0.638403
Cyp3a13	Cyp3a13	ENSMUSG00000029727	13113	5	cytochrome P450, family 3, subfamily a, polypeptide 13 [Source:MGI Symbol;Acc:MGI:88610]	7308	22.198	2.10929	0.482522	-1.42215	0.204617	1.21754	1.97446e-05	0.31189	0.00324117	0.668304	0.0713614	0.000150124	0.49659	0.0258631	0.856564	0.29685
Mettl6	Mettl6	ENSMUSG00000021891	67011	14	methyltransferase like 6 [Source:MGI Symbol;Acc:MGI:1914261]	7471	32.165	2.10915	-1.59855	-1.8596	1.8481	0.0115003	0.000465862	0.00700451	0.00184719	0.00198916	0.98888	0.00218953	0.0320123	0.0173483	0.0273872	0.995876
Inadl	Inadl					9744	3.76326	2.10819	-5.83223	-2.4004	5.54002	-3.13962	0.0386551	7.19846e-07	0.0202591	1.73981e-06	0.0286081	0.0851114	1.74101e-05	0.0928995	0.000114576	0.174425
Foxo3	Foxo3	ENSMUSG00000048756	56484	10	forkhead box O3 [Source:MGI Symbol;Acc:MGI:1890081]	6703	24.4691	2.10688	0.303705	-1.51554	0.287644	1.22789	4.96356e-06	0.494663	0.000805939	0.518605	0.0513862	4.49186e-05	0.665968	0.00927424	0.767483	0.248836
Snhg8	Snhg8	ENSMUSG00000104960		3	small nucleolar RNA host gene 8 [Source:MGI Symbol;Acc:MGI:1917145]	9204	48.3343	2.10284	-4.4816	-2.39337	4.19107	-1.7977	0.0144004	2.19821e-06	0.00592656	7.02075e-06	0.128701	0.0379705	4.69352e-05	0.0396901	0.000355328	0.403941
BC017158	BC017158	ENSMUSG00000030780	233913	7	cDNA sequence BC017158 [Source:MGI Symbol;Acc:MGI:2384572]	10026	13.9957	2.09735	-0.767337	-1.62761	1.23708	0.390535	0.0413419	0.440357	0.107324	0.218726	0.780817	0.0898732	0.618287	0.275947	0.506485	0.916163
Slc26a11	Slc26a11	ENSMUSG00000039908	268512	11	solute carrier family 26, member 11 [Source:MGI Symbol;Acc:MGI:2444589]	7517	23.7678	2.09667	0.105464	-1.78223	0.208977	1.57326	0.00121904	0.865867	0.00544164	0.738155	0.0762924	0.00485309	0.927663	0.0375082	0.891953	0.308298
Ern1	Ern1	ENSMUSG00000020715	78943	11	endoplasmic reticulum (ER) to nucleus signalling 1 [Source:MGI Symbol;Acc:MGI:1930134]	8263	14.3749	2.09194	0.198948	-1.56089	0.332107	1.22878	0.00124844	0.750135	0.0142051	0.595949	0.165423	0.0049503	0.853949	0.0719908	0.81831	0.463071
Miip	Miip	ENSMUSG00000029022	28010	4	migration and invasion inhibitory protein [Source:MGI Symbol;Acc:MGI:106506]	9878	20.891	2.08981	-0.465645	-2.15157	0.403882	1.74769	0.0845065	0.690834	0.0763433	0.729984	0.293278	0.158651	0.815522	0.222972	0.887346	0.608603
Notch1	Notch1	ENSMUSG00000026923	18128	2	notch 1 [Source:MGI Symbol;Acc:MGI:97363]	9052	5.08468	2.0896	0.411003	-1.04978	0.628818	0.42096	0.0135613	0.614184	0.200739	0.442948	0.715061	0.0362387	0.760306	0.408276	0.713099	0.885583
Tmem14a	Tmem14a	ENSMUSG00000025933	75712	1	transmembrane protein 14A [Source:MGI Symbol;Acc:MGI:1922962]	4165	82.0437	2.08729	0.816096	-1.18225	0.0889437	1.0933	1.02132e-13	0.00270882	1.47132e-05	0.74298	0.00433829	4.75109e-12	0.0153593	0.000362262	0.892918	0.0509333
Pomt2	Pomt2	ENSMUSG00000034126	217734	12	protein-O-mannosyltransferase 2 [Source:MGI Symbol;Acc:MGI:2444430]	6396	14.4127	2.08359	-0.503819	-1.72943	0.857982	0.87145	7.73299e-06	0.262457	0.000170916	0.0577821	0.170206	6.61997e-05	0.444077	0.00273165	0.242062	0.469646
3110040N11Rik	3110040N11Rik	ENSMUSG00000025102	67290	7	RIKEN cDNA 3110040N11 gene [Source:MGI Symbol;Acc:MGI:1914540]	8578	63.2997	2.08347	2.25757	-0.84171	-1.0158	1.85751	0.00272383	0.00132569	0.209822	0.136609	0.0522914	0.00955612	0.00891291	0.41949	0.395814	0.251164
Ddi2	Ddi2	ENSMUSG00000078515	68817	4	DNA-damage inducible protein 2 [Source:MGI Symbol;Acc:MGI:1917244]	8510	15.6247	2.08097	1.29041	-1.15291	-0.36236	1.51527	0.00124972	0.0413354	0.0657502	0.562614	0.0866393	0.0049522	0.12246	0.20339	0.79831	0.330014
Opn3	Opn3	ENSMUSG00000026525	13603	1	opsin 3 [Source:MGI Symbol;Acc:MGI:1338022]	10795	9.87806	2.08069	-3.43548	-1.74943	3.76674	-2.01732	0.091548	0.00567197	0.146428	0.00306361	0.23975	0.169433	0.0273274	0.337212	0.0366828	0.554878
Rpl41	Rpl41	ENSMUSG00000093674	67945	10	ribosomal protein L41 [Source:MGI Symbol;Acc:MGI:1915195]	4979	192.929	2.08002	0.831476	-1.40096	-0.152423	1.55339	1.61533e-09	0.0130239	3.27321e-05	0.64761	0.0010131	3.35718e-08	0.0514928	0.00069481	0.848271	0.0180378
Shroom3	Shroom3	ENSMUSG00000029381	27428	5	shroom family member 3 [Source:MGI Symbol;Acc:MGI:1351655]	7914	8.38783	2.07901	1.74162	-1.40618	-1.06878	2.47497	0.00135344	0.00696224	0.0267702	0.0928632	0.0058717	0.00528988	0.0318857	0.112066	0.317537	0.0624411
Sufu	Sufu	ENSMUSG00000025231	24069	19	suppressor of fused homolog (Drosophila) [Source:MGI Symbol;Acc:MGI:1345643]	6771	15.0098	2.07864	-1.6207	-2.0341	1.66524	0.368859	0.000243596	0.0037136	0.000322466	0.00291354	0.632555	0.00126149	0.0197841	0.00453694	0.0353898	0.847201
Poll	Poll	ENSMUSG00000025218	56626	19	polymerase (DNA directed), lambda [Source:MGI Symbol;Acc:MGI:1889000]	10911	6.29302	2.0783	0.415359	-0.333596	1.32934	-0.995746	0.126692	0.744668	0.789799	0.331324	0.585388	0.218903	0.850738	0.887623	0.62053	0.821919
Fzd1	Fzd1	ENSMUSG00000044674	14362	5	frizzled class receptor 1 [Source:MGI Symbol;Acc:MGI:1196625]	10378	4.18999	2.07735	-5.08586	-1.44754	5.71566	-4.26812	0.136521	0.000834536	0.283488	0.000294483	0.0297502	0.232106	0.00615182	0.499772	0.0067954	0.178796
Zfp941	Zfp941	ENSMUSG00000060314	407812	7	zinc finger protein 941 [Source:MGI Symbol;Acc:MGI:3039601]	7282	16.4781	2.07347	-0.647748	-2.04008	0.681141	1.35894	0.00609915	0.375516	0.00689964	0.351678	0.188669	0.0187555	0.558903	0.0440956	0.637333	0.492251
Btbd2	Btbd2	ENSMUSG00000003344	208198	10	BTB (POZ) domain containing 2 [Source:MGI Symbol;Acc:MGI:1933831]	10877	4.71127	2.06932	-3.20857	-1.54032	3.73756	-2.19724	0.124168	0.0148885	0.233854	0.00642031	0.239692	0.215769	0.0568895	0.446206	0.0607239	0.554878
Thoc3	Thoc3	ENSMUSG00000025872	73666	13	THO complex 3 [Source:MGI Symbol;Acc:MGI:1920916]	3907	42.3683	2.06594	0.517522	-1.4293	0.119119	1.31018	4.86571e-14	0.0509392	1.021e-07	0.653122	0.000479657	2.44e-12	0.14297	5.47136e-06	0.851216	0.0106524
Pcdhga3	Pcdhga3	ENSMUSG00000104346	93711	18	protocadherin gamma subfamily A, 3 [Source:MGI Symbol;Acc:MGI:1935215]	7920	12.0869	2.06166	-1.98897	-2.27201	1.77862	0.493397	0.0160691	0.0199616	0.00847396	0.0361152	0.672401	0.0412941	0.0706902	0.0505111	0.181857	0.866611
Bhlhe40	Bhlhe40	ENSMUSG00000030103	20893	6	basic helix-loop-helix family, member e40 [Source:MGI Symbol;Acc:MGI:1097714]	7677	20.0603	2.06083	0.993942	-1.38958	-0.322691	1.71227	0.000421911	0.0811117	0.0151203	0.56882	0.0329444	0.00201148	0.197004	0.0753487	0.802678	0.190959
Sac3d1	Sac3d1	ENSMUSG00000024790	66406	19	SAC3 domain containing 1 [Source:MGI Symbol;Acc:MGI:1913656]	10761	15.286	2.05924	1.31081	-0.634619	0.113804	0.520815	0.0920567	0.276187	0.584827	0.925583	0.758519	0.170253	0.460185	0.754287	0.971197	0.907037
Mrps18a	Mrps18a	ENSMUSG00000023967	68565	17	mitochondrial ribosomal protein S18A [Source:MGI Symbol;Acc:MGI:1915815]	7708	71.3671	2.05909	-0.3746	-1.57499	0.858693	0.716299	0.0001918	0.481878	0.00372817	0.109585	0.341694	0.00103238	0.65391	0.0289052	0.348049	0.6549
Kctd14	Kctd14	ENSMUSG00000051727	233529	7	potassium channel tetramerisation domain containing 14 [Source:MGI Symbol;Acc:MGI:1289222]	10170	14.4561	2.05776	0.496895	-1.35512	0.205752	1.14937	0.081251	0.663563	0.23995	0.857264	0.477205	0.153727	0.798431	0.452691	0.941468	0.756905
Gtf2h3	Gtf2h3	ENSMUSG00000029387	209357	5	general transcription factor IIH, polypeptide 3 [Source:MGI Symbol;Acc:MGI:1277143]	7566	19.7564	2.0563	-3.97738	-2.30712	3.72656	-1.41944	0.0010969	5.17961e-09	0.000286614	3.02323e-08	0.100293	0.00446602	2.16948e-07	0.00411729	3.33838e-06	0.355744
Abcg4	Abcg4	ENSMUSG00000032131	192663	9	ATP-binding cassette, sub-family G (WHITE), member 4 [Source:MGI Symbol;Acc:MGI:1890594]	10608	6.83638	2.05555	4.14167	-0.34029	-2.42642	2.76671	0.0735982	0.00155805	0.75555	0.0554711	0.0960108	0.142561	0.0100964	0.867613	0.235866	0.348431
Pold4	Pold4	ENSMUSG00000024854;ENSMUSG00000097508	69745	19	polymerase (DNA-directed), delta 4 [Source:MGI Symbol;Acc:MGI:1916995]	9969	39.0407	2.05333	0.183501	-2.60432	-0.734492	3.33882	0.165634	0.898151	0.0851723	0.609721	0.107491	0.269332	0.945732	0.238662	0.828782	0.367904
Uprt	Uprt	ENSMUSG00000073016	331487	X	uracil phosphoribosyltransferase [Source:MGI Symbol;Acc:MGI:2685620]	7284	59.3623	2.0523	-0.255631	-1.63839	0.669536	0.968857	7.68094e-05	0.609696	0.00136526	0.183459	0.171868	0.000468059	0.756807	0.0139034	0.463484	0.470774
Fgf11	Fgf11	ENSMUSG00000042826	14166	11	fibroblast growth factor 11 [Source:MGI Symbol;Acc:MGI:109167]	9388	17.4286	2.05181	0.834308	-0.91737	0.300136	0.617234	0.0331493	0.371806	0.325204	0.747386	0.638684	0.0749511	0.555499	0.544598	0.895377	0.849714
Lsg1	Lsg1	ENSMUSG00000022538	224092	16	large 60S subunit nuclear export GTPase 1 [Source:MGI Symbol;Acc:MGI:107236]	3717	43.66	2.04876	0.598104	-1.31572	0.134936	1.18078	7.26362e-16	0.0150293	1.14249e-07	0.583025	0.00068049	5.02569e-14	0.0572473	6.06298e-06	0.811936	0.0136748
Mlc1	Mlc1	ENSMUSG00000035805	170790	15	megalencephalic leukoencephalopathy with subcortical cysts 1 homolog (human) [Source:MGI Symbol;Acc:MGI:2157910]	10909	6.71385	2.04743	5.53861	-0.631427	-4.12261	4.75403	0.102521	0.0019849	0.590349	0.0266207	0.0304305	0.184974	0.0121563	0.757831	0.151099	0.18129
Cxcl14	Cxcl14	ENSMUSG00000021508	57266	13	chemokine (C-X-C motif) ligand 14 [Source:MGI Symbol;Acc:MGI:1888514]	10135	17.2043	2.04682	-0.0461203	-1.24594	0.846996	0.398943	0.167673	0.974241	0.389269	0.556717	0.844007	0.271877	0.987146	0.601928	0.794713	0.942942
Plekhg2	Plekhg2	ENSMUSG00000037552	101497	7	pleckstrin homology domain containing, family G (with RhoGef domain) member 2 [Source:MGI Symbol;Acc:MGI:2141874]	10864	3.11348	2.0439	-1.3746	-0.659148	2.75935	-2.10021	0.139121	0.290211	0.610554	0.0485392	0.262276	0.235456	0.4743	0.771003	0.216672	0.577795
Ptk2b	Ptk2b	ENSMUSG00000059456	19229	14	PTK2 protein tyrosine kinase 2 beta [Source:MGI Symbol;Acc:MGI:104908]	10420	6.04057	2.04249	-2.07321	-1.18054	2.93517	-1.75463	0.124462	0.116123	0.360071	0.0322292	0.335197	0.216177	0.252929	0.577086	0.169073	0.648229
Dusp12	Dusp12	ENSMUSG00000026659	80915	1	dual specificity phosphatase 12 [Source:MGI Symbol;Acc:MGI:1890614]	5485	59.3129	2.04073	0.241102	-1.42152	0.378115	1.0434	2.38303e-09	0.465182	2.19949e-05	0.2536	0.0256501	4.78221e-08	0.640395	0.000506207	0.546169	0.161911
Dolpp1	Dolpp1	ENSMUSG00000026856	57170	2	dolichyl pyrophosphate phosphatase 1 [Source:MGI Symbol;Acc:MGI:1914093]	8652	22.0046	2.03986	0.203429	-1.59173	0.244696	1.34703	0.00496125	0.771738	0.0260293	0.727587	0.175769	0.0158124	0.86577	0.110327	0.885956	0.475999
Fastkd5	Fastkd5	ENSMUSG00000079043	380601	2	FAST kinase domains 5 [Source:MGI Symbol;Acc:MGI:2139469]	7890	19.3811	2.03836	0.448464	-1.42317	0.166721	1.25645	0.000374104	0.41849	0.0112621	0.763732	0.109377	0.0018112	0.597562	0.0611917	0.902269	0.370494
Nfrkb	Nfrkb	ENSMUSG00000042185	235134	9	nuclear factor related to kappa B binding protein [Source:MGI Symbol;Acc:MGI:2442410]	5626	15.5834	2.03746	0.296557	-1.3698	0.371101	0.9987	4.07221e-10	0.346396	1.73939e-05	0.240318	0.025094	9.8056e-09	0.531042	0.000415175	0.533313	0.160153
Zfp280d	Zfp280d	ENSMUSG00000038535	235469	9	zinc finger protein 280D [Source:MGI Symbol;Acc:MGI:2384583]	3742	23.2108	2.03539	1.07066	-1.20013	-0.235403	1.43554	2.07193e-15	1.92472e-05	1.57179e-06	0.343873	4.49574e-05	1.35631e-13	0.000291024	5.61529e-05	0.632124	0.00170651
Dcx	Dcx	ENSMUSG00000031285	13193	X	doublecortin [Source:MGI Symbol;Acc:MGI:1277171]	6311	8.10099	2.03514	-1.34429	-1.66699	1.71244	-0.0454512	2.04141e-05	0.00406053	0.000409151	0.000294641	0.944257	0.000154121	0.0211581	0.00544142	0.0067954	0.981331
Parvb	Parvb	ENSMUSG00000022438	170736	15	parvin, beta [Source:MGI Symbol;Acc:MGI:2153063]	4610	24.4152	2.03412	0.345834	-1.32048	0.367803	0.952682	5.61841e-15	0.169475	2.09347e-07	0.145383	0.00747757	3.39339e-13	0.328552	9.95035e-06	0.407937	0.0733137
Col4a2	Col4a2	ENSMUSG00000031503	12827	8	collagen, type IV, alpha 2 [Source:MGI Symbol;Acc:MGI:88455]	10823	3.14276	2.03242	2.65827	-0.608202	-1.23405	1.84225	0.0826472	0.0334505	0.583065	0.325924	0.270462	0.155991	0.103622	0.752958	0.614747	0.585947
Smim1	Smim1	ENSMUSG00000078350	68859	4	small integral membrane protein 1 [Source:MGI Symbol;Acc:MGI:1916109]	6204	22.3787	2.0288	1.1843	-1.22811	-0.383616	1.61172	9.86916e-08	0.00151487	0.000940294	0.300202	0.00207833	1.36916e-06	0.00986924	0.0104147	0.591626	0.0304558
Pitpnc1	Pitpnc1	ENSMUSG00000040430	71795	11	phosphatidylinositol transfer protein, cytoplasmic 1 [Source:MGI Symbol;Acc:MGI:1919045]	10531	3.89482	2.02701	-0.948899	-1.97708	0.998824	0.978259	0.174886	0.514796	0.184758	0.493624	0.633335	0.281361	0.682979	0.388316	0.749583	0.847476
Opa3	Opa3	ENSMUSG00000052214	403187	7	optic atrophy 3 [Source:MGI Symbol;Acc:MGI:2686271]	9434	19.5124	2.02561	-0.262659	-1.79183	0.496437	1.29539	0.0442681	0.787163	0.0727999	0.61075	0.347881	0.0951887	0.876892	0.216705	0.829406	0.660364
Pex3	Pex3	ENSMUSG00000019809	56535	10	peroxisomal biogenesis factor 3 [Source:MGI Symbol;Acc:MGI:1929646]	5205	61.066	2.02404	1.07662	-1.17898	-0.231553	1.41053	6.10936e-11	0.000375184	9.18247e-05	0.441184	0.000899687	1.79536e-09	0.00326294	0.00165922	0.711563	0.0166419
Zbtb34	Zbtb34	ENSMUSG00000068966	241311	2	zinc finger and BTB domain containing 34 [Source:MGI Symbol;Acc:MGI:2685195]	6500	11.2587	2.02278	1.18971	-1.24115	-0.408086	1.64924	3.62152e-07	0.00229358	0.00137683	0.291605	0.00257103	4.3698e-06	0.0135679	0.0139486	0.584565	0.0355779
Atp8a2	Atp8a2	ENSMUSG00000021983	50769	14	ATPase, aminophospholipid transporter-like, class I, type 8A, member 2 [Source:MGI Symbol;Acc:MGI:1354710]	9705	11.3169	2.01822	-0.751798	-1.88279	0.887228	0.995561	0.0470814	0.446184	0.0626576	0.36997	0.474347	0.0999406	0.623412	0.197398	0.651605	0.754703
Zfp282	Zfp282	ENSMUSG00000025821	101095	6	zinc finger protein 282 [Source:MGI Symbol;Acc:MGI:2141413]	7078	12.5982	2.01751	-0.837583	-1.58035	1.27475	0.305605	3.85073e-05	0.0782627	0.00106509	0.00798422	0.647764	0.000260657	0.192652	0.0115055	0.0682453	0.853587
Eif2b5	Eif2b5	ENSMUSG00000003235	224045	16	eukaryotic translation initiation factor 2B, subunit 5 epsilon [Source:MGI Symbol;Acc:MGI:2446176]	6073	29.0798	2.01732	-1.18596	-1.7077	1.49557	0.212131	6.10861e-07	0.00268419	1.96803e-05	0.000175	0.700705	7.08826e-06	0.0152513	0.000458731	0.00465474	0.879765
Paqr6	Paqr6	ENSMUSG00000041423	68957	3	progestin and adipoQ receptor family member VI [Source:MGI Symbol;Acc:MGI:1916207]	10932	6.6735	2.01711	1.81616	-1.34981	-1.14886	2.49867	0.135847	0.268228	0.286672	0.506793	0.254132	0.231177	0.450979	0.503599	0.759554	0.568715
9130011E15Rik	9130011E15Rik	ENSMUSG00000039901	71617	19	RIKEN cDNA 9130011E15 gene [Source:MGI Symbol;Acc:MGI:1918867]	7983	20.3957	2.01254	-0.577809	-1.68563	0.90472	0.780905	0.00142098	0.34407	0.00688429	0.140758	0.365097	0.00551246	0.529354	0.0440627	0.400883	0.673855
Fastkd1	Fastkd1	ENSMUSG00000027086	320720	2	FAST kinase domains 1 [Source:MGI Symbol;Acc:MGI:2444596]	8200	20.2442	2.01005	0.0324441	-1.38155	0.596062	0.785483	0.000642145	0.954494	0.016648	0.297314	0.329379	0.00287349	0.977199	0.08122	0.589453	0.642765
Ccdc94	Ccdc94	ENSMUSG00000003208	72886	17	coiled-coil domain containing 94 [Source:MGI Symbol;Acc:MGI:1920136]	7375	49.9852	2.00575	1.48186	-1.05374	-0.529845	1.58359	3.58992e-05	0.00201483	0.0255328	0.262986	0.0177431	0.000245128	0.0122708	0.109247	0.555674	0.12781
D8Ertd738e	D8Ertd738e	ENSMUSG00000019362	101966	8	DNA segment, Chr 8, ERATO Doi 738, expressed [Source:MGI Symbol;Acc:MGI:1289231]	4216	142.613	2.00413	0.92795	-1.09449	-0.0183118	1.1128	8.67905e-09	0.00619964	0.00125052	0.956654	0.0195865	1.55032e-07	0.0292856	0.0129703	0.984553	0.136295
Ift46	Ift46	ENSMUSG00000002031	76568	9	intraflagellar transport 46 [Source:MGI Symbol;Acc:MGI:1923818]	3979	29.1459	2.00395	-0.32011	-1.43792	0.886139	0.551781	1.71572e-17	0.159352	4.84947e-10	0.000113102	0.0862993	1.6031e-15	0.314888	5.24896e-08	0.00322828	0.329342
Yy2	Yy2	ENSMUSG00000091736	100073351	X	Yy2 transcription factor [Source:MGI Symbol;Acc:MGI:3837947]	10299	9.83443	1.99951	5.72036	0.946652	-2.7742	1.82754	0.150437	0.000599266	0.480508	0.0640303	0.346514	0.249823	0.00475412	0.676958	0.256309	0.658799
Snx10	Snx10	ENSMUSG00000038301	71982	6	sorting nexin 10 [Source:MGI Symbol;Acc:MGI:1919232]	9282	18.6921	1.99843	1.32546	-0.541	0.131974	0.409026	0.0426719	0.170575	0.569446	0.890074	0.7614	0.0922098	0.329807	0.743484	0.955041	0.908593
Nat2	Nat2	ENSMUSG00000051147	17961	8	N-acetyltransferase 2 (arylamine N-acetyltransferase) [Source:MGI Symbol;Acc:MGI:109201]	7295	48.1566	1.99714	0.361469	-1.50351	0.132158	1.37135	0.0001653	0.481275	0.00395007	0.796916	0.0594632	0.000907157	0.653415	0.0300293	0.913974	0.268505
Naaa	Naaa	ENSMUSG00000029413	67111	5	N-acylethanolamine acid amidase [Source:MGI Symbol;Acc:MGI:1914361]	3766	41.417	1.99186	0.85175	-1.16867	-0.0285611	1.19723	1.34844e-18	0.000112581	1.17644e-07	0.896636	0.000115456	1.44521e-16	0.00123073	6.18311e-06	0.957884	0.00363197
Dym	Dym	ENSMUSG00000035765	69190	18	dymeclin [Source:MGI Symbol;Acc:MGI:1918480]	5275	33.804	1.99173	0.387345	-1.32205	0.282335	1.03972	2.71262e-10	0.204755	1.8514e-05	0.356336	0.0161434	6.84859e-09	0.374312	0.000434827	0.640954	0.120629
Ankrd13b	Ankrd13b	ENSMUSG00000037907	268445	11	ankyrin repeat domain 13b [Source:MGI Symbol;Acc:MGI:2144501]	7246	19.7538	1.98727	0.633595	-1.24872	0.104953	1.14377	8.02996e-05	0.195243	0.0112366	0.829919	0.0978161	0.00048526	0.361578	0.0610832	0.928151	0.352139
Herpud1	Herpud1	ENSMUSG00000031770	64209	8	homocysteine-inducible, endoplasmic reticulum stress-inducible, ubiquitin-like domain member 1 [Source:MGI Symbol;Acc:MGI:1927406]	6054	41.0216	1.98524	0.73674	-1.29639	-0.0478965	1.34429	1.56835e-07	0.0454785	0.000465655	0.896283	0.00971521	2.09343e-06	0.13173	0.00599593	0.957788	0.0866993
Eid2b	Eid2b	ENSMUSG00000070705	434156	7	EP300 interacting inhibitor of differentiation 2B [Source:MGI Symbol;Acc:MGI:1924095]	8790	21.3348	1.98171	-0.977831	-1.81746	1.14208	0.675387	0.00945773	0.189004	0.0166657	0.126473	0.51795	0.0268411	0.353195	0.081254	0.378483	0.78046
Mmd	Mmd	ENSMUSG00000003948	67468	11	monocyte to macrophage differentiation-associated [Source:MGI Symbol;Acc:MGI:1914718]	9286	12.9982	1.97884	-3.55061	-0.715616	4.81384	-4.09822	0.0986637	0.00501582	0.53581	0.00035082	0.0154344	0.179605	0.0249581	0.720341	0.00773219	0.118075
Ceacam1	Ceacam1	ENSMUSG00000074272	26365	7	carcinoembryonic antigen-related cell adhesion molecule 1 [Source:MGI Symbol;Acc:MGI:1347245]	10018	10.2927	1.97845	4.2178	0.489032	-1.75032	1.26129	0.144133	0.00484014	0.707761	0.200393	0.498131	0.242112	0.0243611	0.83673	0.48404	0.769474
Shroom4	Shroom4	ENSMUSG00000068270	208431	X	shroom family member 4 [Source:MGI Symbol;Acc:MGI:2685570]	10707	4.68574	1.97707	-0.855049	-1.44259	1.38953	0.0530624	0.165552	0.537016	0.30161	0.323824	0.979836	0.269277	0.700974	0.520309	0.612676	0.992867
Psmd8	Psmd8	ENSMUSG00000030591	57296	7	proteasome (prosome, macropain) 26S subunit, non-ATPase, 8 [Source:MGI Symbol;Acc:MGI:1888669]	3266	71.0412	1.97672	0.314117	-1.36859	0.294019	1.07457	7.14754e-18	0.157378	1.20615e-09	0.186554	0.000635379	7.16852e-16	0.312273	1.18789e-07	0.467987	0.0129589
Hps1	Hps1	ENSMUSG00000025188	192236	19	Hermansky-Pudlak syndrome 1 [Source:MGI Symbol;Acc:MGI:2177763]	10264	11.3652	1.97575	2.20178	0.43092	0.20489	-0.635809	0.1565	0.116562	0.747797	0.879903	0.738893	0.257703	0.253481	0.862282	0.95041	0.897409
Ifih1	Ifih1	ENSMUSG00000026896	71586	2	interferon induced with helicase C domain 1 [Source:MGI Symbol;Acc:MGI:1918836]	10775	3.57092	1.97571	1.55884	1.21441	1.63128	-2.8457	0.211475	0.305494	0.419295	0.299783	0.190743	0.325612	0.49019	0.626965	0.591451	0.49518
Abhd1	Abhd1	ENSMUSG00000006638		5	abhydrolase domain containing 1 [Source:MGI Symbol;Acc:MGI:1931013]	9633	17.9274	1.97541	-5.57234	-1.67421	5.87354	-4.19933	0.107884	7.82418e-05	0.167229	4.18255e-05	0.0158925	0.192669	0.000913875	0.3649	0.00150407	0.119848
Slc7a6os	Slc7a6os	ENSMUSG00000033106	66432	8	solute carrier family 7, member 6 opposite strand [Source:MGI Symbol;Acc:MGI:1916951]	4051	63.3773	1.97538	0.560239	-1.21408	0.20106	1.01302	7.52655e-14	0.0287829	2.53891e-06	0.432682	0.00513217	3.5774e-12	0.0927638	8.43628e-05	0.704195	0.0567863
Esrra	Esrra	ENSMUSG00000024955	26379	19	estrogen related receptor, alpha [Source:MGI Symbol;Acc:MGI:1346831]	10892	6.33074	1.9745	-2.7514	-1.23373	3.49217	-2.25845	0.141366	0.0321114	0.332487	0.0100429	0.221329	0.238232	0.1007	0.551535	0.0798703	0.534238
Rslcan18	Rslcan18	ENSMUSG00000074824	432770	13	regulator of sex-limitation candidate 18 [Source:MGI Symbol;Acc:MGI:5433745]	9342	15.273	1.96802	-0.190619	-1.3552	0.803446	0.55175	0.0202511	0.816019	0.102996	0.330718	0.634379	0.0499177	0.895475	0.268723	0.619926	0.847768
Med6	Med6	ENSMUSG00000002679	69792	12	mediator complex subunit 6 [Source:MGI Symbol;Acc:MGI:1917042]	7216	65.7813	1.96652	1.4275	-0.901755	-0.362732	1.26449	0.000116646	0.00459867	0.0687439	0.465161	0.071273	0.00067185	0.0233609	0.209243	0.726968	0.29685
Dcxr	Dcxr	ENSMUSG00000039450	67880	11	dicarbonyl L-xylulose reductase [Source:MGI Symbol;Acc:MGI:1915130]	10340	32.9694	1.96489	2.48978	-0.385013	-0.909897	1.29491	0.0978213	0.0409782	0.735718	0.439955	0.429155	0.178528	0.1216	0.854465	0.710321	0.724711
Bcl6	Bcl6	ENSMUSG00000022508	12053	16	B cell leukemia/lymphoma 6 [Source:MGI Symbol;Acc:MGI:107187]	7974	18.1189	1.96327	0.786902	-1.26297	-0.0866045	1.34957	0.00212655	0.206008	0.0434903	0.88889	0.124232	0.0077595	0.375517	0.155626	0.954784	0.397107
Poc1a	Poc1a	ENSMUSG00000023345	70235	9	POC1 centriolar protein A [Source:MGI Symbol;Acc:MGI:1917485]	7410	37.9577	1.9577	0.792422	-1.16731	-0.00203264	1.16935	0.000133048	0.112325	0.0196413	0.99674	0.0964045	0.000754401	0.247169	0.0910243	0.999024	0.348894
Phf13	Phf13	ENSMUSG00000047777	230936	4	PHD finger protein 13 [Source:MGI Symbol;Acc:MGI:2446217]	6594	23.0369	1.95745	0.15004	-1.54055	0.266856	1.2737	6.41688e-05	0.751569	0.00142884	0.574067	0.0581584	0.000403157	0.854158	0.0143303	0.806231	0.265243
Cul7	Cul7	ENSMUSG00000038545	66515	17	cullin 7 [Source:MGI Symbol;Acc:MGI:1913765]	7922	10.8399	1.95667	-1.116	-1.90368	1.16899	0.734696	0.00656688	0.112958	0.00805931	0.0973096	0.455868	0.0199359	0.248163	0.0490286	0.325105	0.742041
Hfm1	Hfm1	ENSMUSG00000043410	330149	5	HFM1, ATP-dependent DNA helicase homolog [Source:MGI Symbol;Acc:MGI:3036246]	9762	8.05694	1.95606	-0.471824	-1.0919	1.33598	-0.244076	0.0613682	0.640634	0.283841	0.194006	0.86396	0.123346	0.780412	0.500233	0.476173	0.951021
Ccdc176	Ccdc176					9729	18.5282	1.95294	1.49308	-0.772312	-0.312453	1.08476	0.0519518	0.133007	0.427501	0.749545	0.431819	0.107902	0.278017	0.634719	0.895914	0.7267
Plxna1	Plxna1	ENSMUSG00000030084	18844	6	plexin A1 [Source:MGI Symbol;Acc:MGI:107685]	9196	5.26454	1.95139	-0.400341	-1.32343	1.0283	0.295132	0.0149911	0.605995	0.0923671	0.190001	0.78811	0.039169	0.753667	0.251684	0.47231	0.918411
Yeats4	Yeats4	ENSMUSG00000020171	64050	10	YEATS domain containing 4 [Source:MGI Symbol;Acc:MGI:1927224]	6779	49.4143	1.94774	0.771867	-1.04592	0.129953	0.915965	2.99943e-05	0.0892389	0.0214172	0.774202	0.152213	0.000211002	0.210823	0.0963908	0.905534	0.442551
Adnp2	Adnp2	ENSMUSG00000053950	240442	18	ADNP homeobox 2 [Source:MGI Symbol;Acc:MGI:2448562]	4780	20.9691	1.94725	-0.307932	-1.57069	0.684497	0.88619	7.72854e-06	0.464718	0.000260549	0.105646	0.137154	6.61997e-05	0.640078	0.00379776	0.341491	0.420416
Pop7	Pop7	ENSMUSG00000029715	74097	5	processing of precursor 7, ribonuclease P family, (S. cerevisiae) [Source:MGI Symbol;Acc:MGI:1921347]	8662	68.2001	1.94681	2.1065	-0.955445	-1.11513	2.07058	0.00395782	0.00206366	0.145814	0.0950189	0.0270871	0.0130946	0.0124778	0.336265	0.321132	0.167392
Mrps16	Mrps16	ENSMUSG00000049960	66242	14	mitochondrial ribosomal protein S16 [Source:MGI Symbol;Acc:MGI:1913492]	7846	107.504	1.94602	0.75374	-1.0611	0.13118	0.929923	0.000509507	0.166587	0.0517808	0.809348	0.22582	0.00236415	0.324997	0.174462	0.920934	0.540426
Rab13	Rab13	ENSMUSG00000027935	68328	3	RAB13, member RAS oncogene family [Source:MGI Symbol;Acc:MGI:1927232]	10113	23.1214	1.94575	2.47125	0.370758	-0.154742	-0.216016	0.147802	0.0711808	0.774522	0.905874	0.906848	0.246569	0.180252	0.879087	0.961645	0.965115
Entpd7	Entpd7	ENSMUSG00000025192	93685	19	ectonucleoside triphosphate diphosphohydrolase 7 [Source:MGI Symbol;Acc:MGI:2135885]	8237	9.46091	1.94538	0.267425	-1.74479	-0.0668361	1.81163	0.0140681	0.727564	0.0266041	0.930611	0.0972405	0.0373011	0.840599	0.111731	0.972976	0.350654
Bbs4	Bbs4	ENSMUSG00000025235	102774	9	Bardet-Biedl syndrome 4 (human) [Source:MGI Symbol;Acc:MGI:2143311]	7762	24.3814	1.94273	0.396277	-1.14971	0.39674	0.752974	0.000449453	0.460038	0.0334414	0.460732	0.320826	0.00212426	0.636505	0.129501	0.724604	0.634225
C530008M17Rik	C530008M17Rik	ENSMUSG00000036377	320827	5	RIKEN cDNA C530008M17 gene [Source:MGI Symbol;Acc:MGI:2444817]	7766	9.15922	1.93855	1.62037	-1.17758	-0.859398	2.03698	0.000835994	0.00502196	0.0379121	0.131136	0.0112376	0.00357275	0.0249773	0.141067	0.385874	0.0958268
Supt3	Supt3	ENSMUSG00000038954	109115	17	suppressor of Ty 3 [Source:MGI Symbol;Acc:MGI:1923723]	7451	43.5459	1.93687	1.02829	-1.29243	-0.383863	1.6763	0.000821597	0.0697192	0.0228067	0.49545	0.0356995	0.00352362	0.177828	0.101104	0.750762	0.201376
3110082I17Rik	3110082I17Rik	ENSMUSG00000053553	73212	5	RIKEN cDNA 3110082I17 gene [Source:MGI Symbol;Acc:MGI:1920462]	10565	17.4234	1.9351	1.27819	-0.934966	-0.27806	1.21303	0.132909	0.31548	0.45384	0.826257	0.495317	0.22731	0.50041	0.657279	0.927094	0.76697
Fgfbp3	Fgfbp3	ENSMUSG00000047632	72514	19	fibroblast growth factor binding protein 3 [Source:MGI Symbol;Acc:MGI:1919764]	7863	34.8516	1.93128	0.870168	-1.12822	-0.0671079	1.19533	0.000316382	0.096565	0.0311571	0.897619	0.104876	0.00157356	0.222758	0.124219	0.958378	0.363508
Skiv2l	Skiv2l	ENSMUSG00000040356	108077	17	superkiller viralicidic activity 2-like (S. cerevisiae) [Source:MGI Symbol;Acc:MGI:1099835]	3045	27.8692	1.92807	0.485763	-1.25919	0.183111	1.07608	9.17557e-11	0.0922562	1.58301e-05	0.525338	0.00837103	2.57198e-09	0.215824	0.000386284	0.7717	0.0792999
Swsap1	Swsap1	ENSMUSG00000051238	66962	9	SWIM type zinc finger 7 associated protein 1 [Source:MGI Symbol;Acc:MGI:1914212]	7963	32.5816	1.92687	0.475051	-1.7598	-0.307987	2.06779	0.015871	0.540309	0.0267521	0.69111	0.0612554	0.0409201	0.704012	0.112051	0.868117	0.272656
Elof1	Elof1	ENSMUSG00000013822	66126	9	ELF1 homolog, elongation factor 1 [Source:MGI Symbol;Acc:MGI:1913376]	7700	59.0186	1.92076	0.583938	-1.05036	0.286463	0.7639	0.000506483	0.276456	0.0511636	0.593551	0.313133	0.00235111	0.460377	0.173486	0.817564	0.626636
A430005L14Rik	A430005L14Rik	ENSMUSG00000047613	97159	4	RIKEN cDNA A430005L14 gene [Source:MGI Symbol;Acc:MGI:2140680]	8615	48.9918	1.9173	0.292652	-1.55376	0.0708936	1.48286	0.0162253	0.705201	0.0487177	0.926998	0.176878	0.0416275	0.826241	0.167479	0.971708	0.47661
Znrd1	Znrd1	ENSMUSG00000036315	66136	17	zinc ribbon domain containing, 1 [Source:MGI Symbol;Acc:MGI:1913386]	8011	77.5269	1.91603	-2.82765	-1.86266	2.88101	-1.01835	0.00115029	3.33153e-06	0.00153788	2.30663e-06	0.208063	0.00464191	6.7445e-05	0.0151461	0.00014492	0.516311
Alk	Alk	ENSMUSG00000055471	11682	17	anaplastic lymphoma kinase [Source:MGI Symbol;Acc:MGI:103305]	10639	4.09187	1.91585	-1.46252	-2.38742	0.99095	1.39647	0.149742	0.269948	0.0783611	0.448275	0.448844	0.248948	0.452881	0.227226	0.715559	0.738149
Uap1l1	Uap1l1	ENSMUSG00000026956	227620	2	UDP-N-acteylglucosamine pyrophosphorylase 1-like 1 [Source:MGI Symbol;Acc:MGI:2443318]	9345	26.5373	1.91181	-0.383267	-1.45893	0.836153	0.622773	0.0442363	0.677309	0.119301	0.367172	0.632611	0.095139	0.806639	0.295085	0.64938	0.847201
Nid1	Nid1	ENSMUSG00000005397	18073	13	nidogen 1 [Source:MGI Symbol;Acc:MGI:97342]	6492	12.0868	1.91125	1.72718	-1.05165	-0.867573	1.91922	1.83057e-06	1.626e-05	0.00710854	0.0277482	0.000543529	1.88081e-05	0.000253934	0.0449194	0.154915	0.0116279
Pnpla6	Pnpla6	ENSMUSG00000004565	50767	8	patatin-like phospholipase domain containing 6 [Source:MGI Symbol;Acc:MGI:1354723]	5614	17.9723	1.90902	0.961871	-1.10101	-0.153857	1.25487	2.38414e-08	0.00407032	0.000978193	0.64409	0.00767137	3.8385e-07	0.021199	0.0107378	0.846656	0.0744138
Dync1i1	Dync1i1	ENSMUSG00000029757	13426	6	dynein cytoplasmic 1 intermediate chain 1 [Source:MGI Symbol;Acc:MGI:107743]	10499	9.96647	1.9056	3.06864	-0.171826	-1.33487	1.50669	0.141587	0.0250892	0.890263	0.30869	0.402418	0.238568	0.0840047	0.94379	0.598462	0.702502
Saal1	Saal1	ENSMUSG00000006763	78935	7	serum amyloid A-like 1 [Source:MGI Symbol;Acc:MGI:1926185]	7449	13.7221	1.90208	0.185615	-1.31793	0.398531	0.919402	0.000263531	0.713378	0.0100412	0.431787	0.198884	0.00134748	0.831678	0.0566705	0.703891	0.505429
Brms1	Brms1	ENSMUSG00000080268	107392	19	breast cancer metastasis-suppressor 1 [Source:MGI Symbol;Acc:MGI:2388804]	7070	50.6401	1.90058	0.450419	-1.22334	0.22682	0.996524	1.5008e-05	0.291138	0.00444553	0.595518	0.0985901	0.000118034	0.475246	0.0325978	0.818173	0.353474
Pcdhga12	Pcdhga12	ENSMUSG00000102428	93724	18	protocadherin gamma subfamily A, 12 [Source:MGI Symbol;Acc:MGI:1935229]	7058	13.4296	1.9005	1.16165	-0.997091	-0.258241	1.25533	0.000105526	0.0158831	0.0368951	0.588503	0.0627329	0.000617619	0.0597706	0.138224	0.814709	0.276132
Cep44	Cep44	ENSMUSG00000038215	382010	8	centrosomal protein 44 [Source:MGI Symbol;Acc:MGI:3525111]	6263	53.5209	1.89994	0.0678966	-1.41596	0.416083	0.99988	4.95207e-06	0.866289	0.000547904	0.303755	0.080123	4.48517e-05	0.927731	0.006826	0.59334	0.316211
Mpped2	Mpped2	ENSMUSG00000016386	77015	2	metallophosphoesterase domain containing 2 [Source:MGI Symbol;Acc:MGI:1924265]	10669	8.18282	1.89736	-0.232269	-0.772676	1.35696	-0.58428	0.150796	0.855081	0.543935	0.299308	0.745164	0.250304	0.921142	0.72631	0.591451	0.901162
Fbl	Fbl	ENSMUSG00000046865	14113	7	fibrillarin [Source:MGI Symbol;Acc:MGI:95486]	10444	23.1492	1.89606	1.29761	-0.184835	0.413623	-0.228787	0.167129	0.3357	0.88867	0.757635	0.902705	0.271196	0.520919	0.942832	0.900434	0.963443
Nagpa	Nagpa	ENSMUSG00000023143	27426	16	N-acetylglucosamine-1-phosphodiester alpha-N-acetylglucosaminidase [Source:MGI Symbol;Acc:MGI:1351598]	9516	18.3116	1.89541	-2.47031	-2.45535	1.91037	0.544984	0.0946852	0.0330584	0.0340254	0.0922837	0.725881	0.173966	0.102552	0.130836	0.316054	0.89011
Adam18	Adam18	ENSMUSG00000031552	13524	8	a disintegrin and metallopeptidase domain 18 [Source:MGI Symbol;Acc:MGI:105986]	10868	7.26041	1.89377	0.90326	-0.249214	0.741296	-0.492082	0.147368	0.474088	0.839264	0.571636	0.781109	0.245967	0.647261	0.914648	0.80416	0.916309
Lypla2	Lypla2	ENSMUSG00000028670	26394	4	lysophospholipase 2 [Source:MGI Symbol;Acc:MGI:1347000]	10622	10.9708	1.89041	-4.68296	-1.8015	4.77186	-2.97036	0.138065	0.000602129	0.154398	0.000517319	0.0994701	0.234185	0.00476991	0.348051	0.0102824	0.354782
Stat1	Stat1	ENSMUSG00000026104	20846	1	signal transducer and activator of transcription 1 [Source:MGI Symbol;Acc:MGI:103063]	3166	21.0522	1.88548	-0.36203	-1.48793	0.759576	0.728353	9.03034e-11	0.199275	2.22168e-07	0.00737733	0.0678205	2.55089e-09	0.36724	1.02913e-05	0.0661058	0.289502
Smg9	Smg9	ENSMUSG00000002210	71997	7	smg-9 homolog, nonsense mediated mRNA decay factor (C. elegans) [Source:MGI Symbol;Acc:MGI:1919247]	6966	30.6209	1.8811	-0.186079	-1.73834	0.32884	1.4095	0.00317235	0.763434	0.00615148	0.595203	0.108331	0.0108409	0.86155	0.0407293	0.817946	0.369681
Lect1	Lect1					9108	34.2508	1.87027	2.29967	-0.793794	-1.22319	2.01698	0.0151278	0.0034601	0.288748	0.109969	0.0594015	0.0394319	0.0186886	0.505702	0.348776	0.268505
Mastl	Mastl	ENSMUSG00000026779	67121	2	microtubule associated serine/threonine kinase-like [Source:MGI Symbol;Acc:MGI:1914371]	9512	9.43098	1.8698	0.085599	-1.17994	0.604264	0.575675	0.0360336	0.921133	0.176783	0.487234	0.638285	0.080297	0.958213	0.37768	0.743804	0.849651
Pcsk2	Pcsk2	ENSMUSG00000027419	18549	2	proprotein convertase subtilisin/kexin type 2 [Source:MGI Symbol;Acc:MGI:97512]	8750	11.1194	1.86779	1.10773	-0.944513	-0.184456	1.12897	0.00756735	0.106943	0.165857	0.7867	0.240964	0.0222177	0.239573	0.363065	0.910798	0.556431
1810009A15Rik	1810009A15Rik	ENSMUSG00000071653	66276	19	RIKEN cDNA 1810009A15 gene [Source:MGI Symbol;Acc:MGI:1913526]	10927	22.5302	1.86744	2.67259	-0.673639	-1.47878	2.15242	0.12659	0.0567111	0.553652	0.316152	0.246735	0.218795	0.154259	0.732121	0.605239	0.561171
Maml2	Maml2	ENSMUSG00000031925	270118	9	mastermind like 2 (Drosophila) [Source:MGI Symbol;Acc:MGI:2389460]	7018	11.0556	1.86572	-1.06136	-1.57116	1.35592	0.215242	0.00108885	0.0577073	0.00548265	0.0160917	0.783395	0.00443987	0.156378	0.0376248	0.108858	0.917066
Wasf3	Wasf3	ENSMUSG00000029636	245880	5	WAS protein family, member 3 [Source:MGI Symbol;Acc:MGI:2658986]	8888	19.1836	1.86534	2.56518	-0.743183	-1.44302	2.1862	0.00912621	0.000520296	0.284832	0.0439039	0.0283089	0.0260626	0.00424469	0.501414	0.203631	0.173083
Zfp30	Zfp30	ENSMUSG00000047473	22693	7	zinc finger protein 30 [Source:MGI Symbol;Acc:MGI:99178]	9701	15.5814	1.86502	3.67924	-0.210764	-2.02498	2.23575	0.0697097	0.000980693	0.831909	0.0543221	0.119733	0.136499	0.00699343	0.911356	0.232335	0.388783
Dnmbp	Dnmbp	ENSMUSG00000025195	71972	19	dynamin binding protein [Source:MGI Symbol;Acc:MGI:1917352]	10074	5.91512	1.86328	1.28154	-0.977017	-0.395271	1.37229	0.076507	0.217887	0.340673	0.701318	0.34497	0.146758	0.391123	0.557938	0.873511	0.658671
Ctsf	Ctsf	ENSMUSG00000083282	56464	19	cathepsin F [Source:MGI Symbol;Acc:MGI:1861434]	6328	37.7016	1.85898	-0.00329056	-1.37284	0.489429	0.88341	2.10918e-06	0.993099	0.000375876	0.200155	0.101093	2.12708e-05	0.996539	0.0050918	0.483877	0.356658
Klhl21	Klhl21	ENSMUSG00000073700	242785	4	kelch-like 21 [Source:MGI Symbol;Acc:MGI:1919288]	8748	13.4252	1.85797	1.57073	-1.00841	-0.721172	1.72958	0.0174891	0.043505	0.186684	0.346597	0.109805	0.0442059	0.127335	0.390814	0.634037	0.371292
1700019G17Rik	1700019G17Rik					7585	20.6422	1.85774	0.426208	-1.16272	0.268805	0.893919	0.000279945	0.3913	0.0202707	0.589294	0.203512	0.0014188	0.57288	0.0929137	0.815051	0.510391
Ppif	Ppif	ENSMUSG00000021868	105675	14	peptidylprolyl isomerase F (cyclophilin F) [Source:MGI Symbol;Acc:MGI:2145814]	9775	26.0457	1.8573	-0.0489371	-1.1039	0.802337	0.301562	0.0542332	0.958262	0.242006	0.395223	0.820083	0.111716	0.979175	0.454602	0.672882	0.932606
Htra2	Htra2	ENSMUSG00000068329	64704	6	HtrA serine peptidase 2 [Source:MGI Symbol;Acc:MGI:1928676]	9245	27.5407	1.85292	0.396784	-1.45311	0.00302505	1.45008	0.0342529	0.641335	0.092691	0.997166	0.229874	0.0768581	0.781092	0.252127	0.999298	0.544028
Tcea2	Tcea2	ENSMUSG00000059540	21400	2	transcription elongation factor A (SII), 2 [Source:MGI Symbol;Acc:MGI:107368]	8744	46.1272	1.84776	1.15558	-1.08721	-0.395026	1.48223	0.0478012	0.208161	0.23429	0.663944	0.249788	0.100998	0.37833	0.446601	0.855433	0.564006
Rorb	Rorb	ENSMUSG00000036192	225998	19	RAR-related orphan receptor beta [Source:MGI Symbol;Acc:MGI:1343464]	9171	4.27391	1.84529	-3.57644	-1.50251	3.91922	-2.41671	0.0495274	0.000351221	0.105563	0.000117747	0.064064	0.104022	0.00310141	0.273325	0.00334341	0.280139
Fn3krp	Fn3krp	ENSMUSG00000039253	238024	11	fructosamine 3 kinase related protein [Source:MGI Symbol;Acc:MGI:2679256]	3867	49.1053	1.84514	0.322572	-1.36103	0.161534	1.1995	8.84413e-10	0.270212	4.47701e-06	0.581045	0.00380611	1.97718e-08	0.45313	0.000135201	0.810911	0.0469091
Fez2	Fez2	ENSMUSG00000056121	225020	17	fasciculation and elongation protein zeta 2 (zygin II) [Source:MGI Symbol;Acc:MGI:2675856]	1947	34.4863	1.84497	0.937495	-1.03104	-0.123562	1.1546	3.5929e-17	1.21752e-05	1.47583e-06	0.561595	0.000127428	3.11727e-15	0.00020045	5.34232e-05	0.797556	0.00393514
R74862	R74862	ENSMUSG00000059277		7	expressed sequence R74862 [Source:MGI Symbol;Acc:MGI:2142382]	7727	22.5817	1.84229	-0.571722	-1.54412	0.869894	0.674221	0.00105029	0.296188	0.0055509	0.113823	0.382739	0.00432024	0.48005	0.0378792	0.355315	0.685406
Fam189b	Fam189b	ENSMUSG00000032657	68521	3	family with sequence similarity 189, member B [Source:MGI Symbol;Acc:MGI:1915771]	9200	15.5075	1.84016	0.0735262	-1.1422	0.624435	0.517764	0.0245866	0.926233	0.154413	0.434495	0.645224	0.0586091	0.961138	0.348051	0.706123	0.852878
Dgkz	Dgkz	ENSMUSG00000040479	104418	2	diacylglycerol kinase zeta [Source:MGI Symbol;Acc:MGI:1278339]	6379	21.1749	1.83846	1.42539	-1.05469	-0.64162	1.69631	1.30936e-05	0.000660827	0.0105755	0.120741	0.00366942	0.00010494	0.00515643	0.0585968	0.368334	0.0459488
Id2	Id2	ENSMUSG00000020644	15902	12	inhibitor of DNA binding 2 [Source:MGI Symbol;Acc:MGI:96397]	10256	24.4717	1.83833	-2.46624	-2.52957	1.77499	0.754579	0.218505	0.107088	0.0991301	0.233953	0.713177	0.33385	0.239747	0.262777	0.526791	0.885077
Nkiras2	Nkiras2	ENSMUSG00000017837	71966	11	NFKB inhibitor interacting Ras-like protein 2 [Source:MGI Symbol;Acc:MGI:1919216]	7988	30.0164	1.83714	0.468285	-1.18759	0.181264	1.00632	0.00139051	0.402618	0.0351599	0.746084	0.203363	0.0054135	0.583588	0.133554	0.894395	0.510251
Ttc32	Ttc32	ENSMUSG00000066637	75516	12	tetratricopeptide repeat domain 32 [Source:MGI Symbol;Acc:MGI:1922766]	8690	53.6012	1.8336	1.90795	-1.05206	-1.1264	2.17846	0.0104296	0.0082154	0.133045	0.112133	0.0288206	0.0290799	0.0360636	0.315909	0.352418	0.175025
Grk4	Grk4	ENSMUSG00000052783	14772	5	G protein-coupled receptor kinase 4 [Source:MGI Symbol;Acc:MGI:95801]	8406	22.5449	1.83227	-0.915434	-2.10552	0.642179	1.46334	0.0543342	0.325968	0.0284895	0.488862	0.265262	0.111861	0.510674	0.116866	0.745153	0.581596
Enkd1	Enkd1	ENSMUSG00000013155	102124	8	enkurin domain containing 1 [Source:MGI Symbol;Acc:MGI:2142593]	10781	15.2695	1.82902	-1.74798	-1.30706	2.26994	-0.962885	0.116491	0.125961	0.249529	0.0533093	0.547767	0.204904	0.268264	0.462951	0.22953	0.800774
Pgs1	Pgs1	ENSMUSG00000017715	74451	11	phosphatidylglycerophosphate synthase 1 [Source:MGI Symbol;Acc:MGI:1921701]	8181	25.1252	1.82508	0.201644	-1.16319	0.460245	0.702945	0.00258488	0.731801	0.050214	0.435863	0.398598	0.00914494	0.843887	0.171544	0.707266	0.698985
Tox	Tox	ENSMUSG00000041272	252838	4	thymocyte selection-associated high mobility group box [Source:MGI Symbol;Acc:MGI:2181659]	10205	11.6497	1.82481	3.54342	-0.278847	-1.99746	2.27631	0.104333	0.00365407	0.797212	0.0851472	0.149338	0.187593	0.0195245	0.891209	0.302351	0.439238
Hexim1	Hexim1	ENSMUSG00000048878	192231	11	hexamethylene bis-acetamide inducible 1 [Source:MGI Symbol;Acc:MGI:2385923]	5616	23.9839	1.8247	0.937755	-1.1574	-0.270455	1.42786	5.9695e-08	0.00455596	0.000455215	0.41094	0.00214404	8.75954e-07	0.0231978	0.00590321	0.685928	0.0312515
Irak1bp1	Irak1bp1	ENSMUSG00000032251	65099	9	interleukin-1 receptor-associated kinase 1 binding protein 1 [Source:MGI Symbol;Acc:MGI:1929475]	8439	30.5852	1.82445	-0.00446009	-1.14936	0.679551	0.469804	0.00517876	0.994381	0.072439	0.286469	0.600272	0.0164242	0.997208	0.215966	0.580192	0.829457
Apc2	Apc2	ENSMUSG00000020135	23805	10	adenomatosis polyposis coli 2 [Source:MGI Symbol;Acc:MGI:1346052]	8865	5.70156	1.82256	1.26648	-0.87972	-0.32364	1.20336	0.0115326	0.0755365	0.211076	0.646209	0.226648	0.031685	0.188106	0.421126	0.847451	0.5413
D10Wsu102e	D10Wsu102e	ENSMUSG00000020255	28109	10	DNA segment, Chr 10, Wayne State University 102, expressed [Source:MGI Symbol;Acc:MGI:106381]	4687	25.4656	1.82174	-0.437968	-1.36867	0.891038	0.477633	2.73488e-11	0.0996975	3.85368e-07	0.000887792	0.203744	8.51788e-10	0.228107	1.65209e-05	0.01526	0.510494
Ap1s1	Ap1s1	ENSMUSG00000004849	11769	5	adaptor protein complex AP-1, sigma 1 [Source:MGI Symbol;Acc:MGI:1098244]	8877	40.416	1.82009	0.0745187	-1.49557	0.249996	1.24558	0.0199155	0.921899	0.0532772	0.742632	0.247981	0.0491983	0.958824	0.177532	0.892918	0.562368
Gm5124	Gm5124	ENSMUSG00000051537		X	predicted pseudogene 5124 [Source:MGI Symbol;Acc:MGI:3643622]	8779	26.0017	1.81541	0.59701	-0.837964	0.380436	0.457528	0.0197584	0.431262	0.269674	0.61621	0.669007	0.0489129	0.61022	0.484721	0.833052	0.865615
Cacnb3	Cacnb3	ENSMUSG00000003352	12297	15	calcium channel, voltage-dependent, beta 3 subunit [Source:MGI Symbol;Acc:MGI:103307]	8318	21.6936	1.81109	2.4306	-0.207368	-0.82687	1.03424	0.0275865	0.00388095	0.794515	0.305695	0.36119	0.0644669	0.0204367	0.889481	0.595378	0.671419
Pygb	Pygb	ENSMUSG00000033059	110078	2	brain glycogen phosphorylase [Source:MGI Symbol;Acc:MGI:97828]	6307	19.2789	1.81096	-0.261151	-1.33862	0.733489	0.605135	5.73112e-06	0.500908	0.00066835	0.0602973	0.270237	5.10616e-05	0.670248	0.00799164	0.247808	0.585762
Mapk10	Mapk10	ENSMUSG00000046709	26414	5	mitogen-activated protein kinase 10 [Source:MGI Symbol;Acc:MGI:1346863]	6497	10.1143	1.81051	1.37896	-0.876219	-0.444675	1.32089	9.0168e-06	0.000647806	0.0275882	0.265497	0.0190451	7.55918e-05	0.00506568	0.114413	0.557942	0.133634
Il17ra	Il17ra	ENSMUSG00000002897	16172	6	interleukin 17 receptor A [Source:MGI Symbol;Acc:MGI:107399]	6848	17.4909	1.81028	-0.157994	-1.36307	0.605195	0.757879	7.95599e-05	0.723055	0.00259258	0.176743	0.229815	0.000481856	0.838214	0.0222466	0.453664	0.544028
B4galt5	B4galt5	ENSMUSG00000017929	56336	2	UDP-Gal:betaGlcNAc beta 1,4-galactosyltransferase, polypeptide 5 [Source:MGI Symbol;Acc:MGI:1927169]	10506	3.9619	1.80733	-4.31741	-0.720197	5.40454	-4.68434	0.214039	0.00491862	0.603731	0.000935989	0.0226621	0.328755	0.024654	0.767351	0.0157662	0.150603
Tbc1d2b	Tbc1d2b	ENSMUSG00000037410	67016	9	TBC1 domain family, member 2B [Source:MGI Symbol;Acc:MGI:1914266]	9766	6.42171	1.80652	-1.53431	-1.11195	2.22887	-1.11692	0.0801407	0.132873	0.271484	0.0331502	0.431483	0.152048	0.277896	0.486376	0.172242	0.72647
Zfp346	Zfp346	ENSMUSG00000021481	26919	13	zinc finger protein 346 [Source:MGI Symbol;Acc:MGI:1349417]	7318	17.7083	1.80639	-0.987177	-1.43291	1.36065	0.0722665	0.00145335	0.0756132	0.0106132	0.0152435	0.926155	0.00561216	0.188207	0.0587761	0.104282	0.974093
Acvr2a	Acvr2a	ENSMUSG00000052155	11480	2	activin receptor IIA [Source:MGI Symbol;Acc:MGI:102806]	8542	9.5738	1.80584	1.20275	-0.86127	-0.258186	1.11946	0.0111642	0.0865419	0.214729	0.710111	0.253939	0.0308512	0.206027	0.424949	0.877069	0.568482
Ring1	Ring1	ENSMUSG00000024325	19763	17	ring finger protein 1 [Source:MGI Symbol;Acc:MGI:1101770]	9571	20.9681	1.80412	-1.31269	-2.09833	1.01847	1.07986	0.0941109	0.217723	0.0539386	0.335539	0.467244	0.173173	0.390892	0.178972	0.624891	0.750722
Snca	Snca	ENSMUSG00000025889	20617	6	synuclein, alpha [Source:MGI Symbol;Acc:MGI:1277151]	8587	45.869	1.80343	3.29093	-0.715583	-2.20309	2.91867	0.00629949	3.29661e-06	0.265253	0.00122228	0.00175724	0.0192686	6.68619e-05	0.480504	0.0191982	0.027133
Tmem181c-ps	Tmem181c-ps	ENSMUSG00000093880		17	transmembrane protein 181C, pseudogene [Source:MGI Symbol;Acc:MGI:3780993]	10830	4.96081	1.7996	2.71279	-0.873526	-1.78672	2.66025	0.104066	0.0272702	0.412172	0.148654	0.102742	0.187236	0.0893104	0.621413	0.41328	0.360106
Enpp3	Enpp3	ENSMUSG00000019989	209558	10	ectonucleotide pyrophosphatase/phosphodiesterase 3 [Source:MGI Symbol;Acc:MGI:2143702]	7464	23.2429	1.79951	0.556864	-1.26273	-0.0200775	1.2828	0.000457522	0.266626	0.0124604	0.968017	0.0703632	0.00215867	0.449253	0.0657736	0.987713	0.294762
Bax	Bax	ENSMUSG00000003873	12028	7	BCL2-associated X protein [Source:MGI Symbol;Acc:MGI:99702]	8541	60.221	1.79789	-1.77461	-1.64142	1.93108	-0.289661	0.00706392	0.00774253	0.0134101	0.00395696	0.752053	0.0210934	0.0343931	0.0692986	0.0443212	0.903882
Rptor	Rptor	ENSMUSG00000025583	74370	11	regulatory associated protein of MTOR, complex 1 [Source:MGI Symbol;Acc:MGI:1921620]	6714	10.1432	1.79713	-0.401441	-1.43328	0.765285	0.667998	0.000252169	0.400752	0.0031555	0.111026	0.32257	0.00130034	0.582055	0.0254395	0.350744	0.636612
Pde5a	Pde5a	ENSMUSG00000053965	242202	3	phosphodiesterase 5A, cGMP-specific [Source:MGI Symbol;Acc:MGI:2651499]	10684	3.455	1.79641	0.131254	-0.811242	0.853917	-0.0426748	0.121525	0.907141	0.469323	0.457319	0.977012	0.211951	0.951344	0.668836	0.722965	0.99171
Rplp2	Rplp2	ENSMUSG00000025508	67186	7	ribosomal protein, large P2 [Source:MGI Symbol;Acc:MGI:1914436]	9099	111.612	1.79601	0.43342	-1.26291	0.0996802	1.16323	0.0242122	0.57688	0.107353	0.89791	0.290054	0.0579565	0.731777	0.275947	0.958378	0.606052
Tpt1	Tpt1	ENSMUSG00000060126	22070	14	tumor protein, translationally-controlled 1 [Source:MGI Symbol;Acc:MGI:104890]	2972	125.095	1.79481	0.368436	-1.06268	0.363691	0.69899	5.97436e-17	0.0776043	4.27393e-07	0.0821922	0.0178737	4.98562e-15	0.191635	1.80396e-05	0.295287	0.128381
Idnk	Idnk	ENSMUSG00000050002	75731	13	idnK gluconokinase homolog (E. coli) [Source:MGI Symbol;Acc:MGI:1922981]	7299	44.1777	1.79342	1.28817	-1.1962	-0.690945	1.88714	0.00058707	0.0126764	0.0196582	0.177292	0.00917341	0.00266632	0.0504287	0.0910333	0.454115	0.084288
Rrp9	Rrp9	ENSMUSG00000041506	27966	9	RRP9, small subunit (SSU) processome component, homolog (yeast) [Source:MGI Symbol;Acc:MGI:2384313]	9325	28.692	1.79186	1.07319	-1.20666	-0.487987	1.69464	0.118131	0.341353	0.284659	0.662872	0.285684	0.207089	0.526923	0.50119	0.855147	0.601446
Leprel4	Leprel4					5785	42.6479	1.79025	0.598479	-1.2085	-0.0167277	1.22523	4.25358e-07	0.0835932	0.000514507	0.961383	0.012178	5.04888e-06	0.201538	0.00650242	0.985636	0.100551
Mapk8ip2	Mapk8ip2	ENSMUSG00000022619	60597	15	mitogen-activated protein kinase 8 interacting protein 2 [Source:MGI Symbol;Acc:MGI:1926555]	9924	10.1449	1.78727	-1.19169	-1.11643	1.86253	-0.746099	0.0901233	0.249725	0.2801	0.0780687	0.606559	0.167215	0.430001	0.49612	0.285842	0.833033
Serpinh1	Serpinh1	ENSMUSG00000070436	12406	7	serine (or cysteine) peptidase inhibitor, clade H, member 1 [Source:MGI Symbol;Acc:MGI:88283]	7776	28.0769	1.78723	1.55936	-0.948085	-0.720211	1.6683	0.000690876	0.00301561	0.065528	0.164702	0.0223775	0.00304492	0.0167344	0.203167	0.437134	0.149482
Coro7	Coro7	ENSMUSG00000039637	78885	16	coronin 7 [Source:MGI Symbol;Acc:MGI:1926135]	4993	25.0172	1.78649	0.273764	-1.34911	0.16362	1.18549	8.08734e-07	0.437394	0.00016021	0.642789	0.0176336	9.16174e-06	0.61547	0.00262188	0.846317	0.127494
Plekhb2	Plekhb2	ENSMUSG00000026123	226971	1	pleckstrin homology domain containing, family B (evectins) member 2 [Source:MGI Symbol;Acc:MGI:2385825]	6467	26.1952	1.78072	0.618414	-1.29345	-0.131138	1.42458	0.000428545	0.210519	0.00946141	0.790127	0.0414593	0.00203958	0.381663	0.0545406	0.912047	0.219165
Fibin	Fibin	ENSMUSG00000074971	67606	2	fin bud initiation factor homolog (zebrafish) [Source:MGI Symbol;Acc:MGI:1914856]	10600	8.05214	1.78071	-3.77056	-1.06059	4.49069	-3.43011	0.23201	0.0159225	0.463096	0.00582043	0.100768	0.350516	0.0598779	0.664553	0.0570664	0.356594
Smim12	Smim12	ENSMUSG00000042380	80284	4	small integral membrane protein 12 [Source:MGI Symbol;Acc:MGI:1933141]	9578	42.6803	1.77778	0.0328891	-1.79607	-0.0511843	1.84726	0.0938924	0.974626	0.0907152	0.960526	0.209639	0.172887	0.987361	0.248795	0.98551	0.518149
Mier2	Mier2	ENSMUSG00000042570	70427	10	MIER family member 2 [Source:MGI Symbol;Acc:MGI:1917677]	8806	20.4823	1.77736	1.71284	-0.817438	-0.752919	1.57036	0.0108749	0.0143638	0.229794	0.273388	0.104532	0.0301509	0.0553099	0.442195	0.566462	0.363447
Agbl5	Agbl5	ENSMUSG00000029165	231093	5	ATP/GTP binding protein-like 5 [Source:MGI Symbol;Acc:MGI:2441745]	9428	15.5948	1.77534	0.642241	-1.08303	0.0500763	1.03295	0.0364308	0.438856	0.193018	0.951808	0.377738	0.0809968	0.616972	0.398703	0.983396	0.683341
Spata24	Spata24	ENSMUSG00000024352	71242	18	spermatogenesis associated 24 [Source:MGI Symbol;Acc:MGI:1918492]	9235	66.8822	1.77266	1.56574	-0.838052	-0.631126	1.46918	0.0473467	0.0789727	0.336833	0.471798	0.235002	0.100406	0.193789	0.555393	0.731884	0.548536
Bri3bp	Bri3bp	ENSMUSG00000037905	76809	5	Bri3 binding protein [Source:MGI Symbol;Acc:MGI:1924059]	5122	12.2832	1.77151	1.03922	-1.03839	-0.306088	1.34447	4.0639e-09	0.000461934	0.000432606	0.299279	0.00125053	7.73981e-08	0.00387557	0.00567056	0.591451	0.021032
[truncated: 9,432 more rows]
