# Supplementary figures and images for: Stage-specific control of oligodendrocyte survival and morphogenesis by TDP-43
Source: eLife journal article supplement (doi:10.7554/elife.75230), 2022-03-21

20210413 Ermin-red GAPDH-green

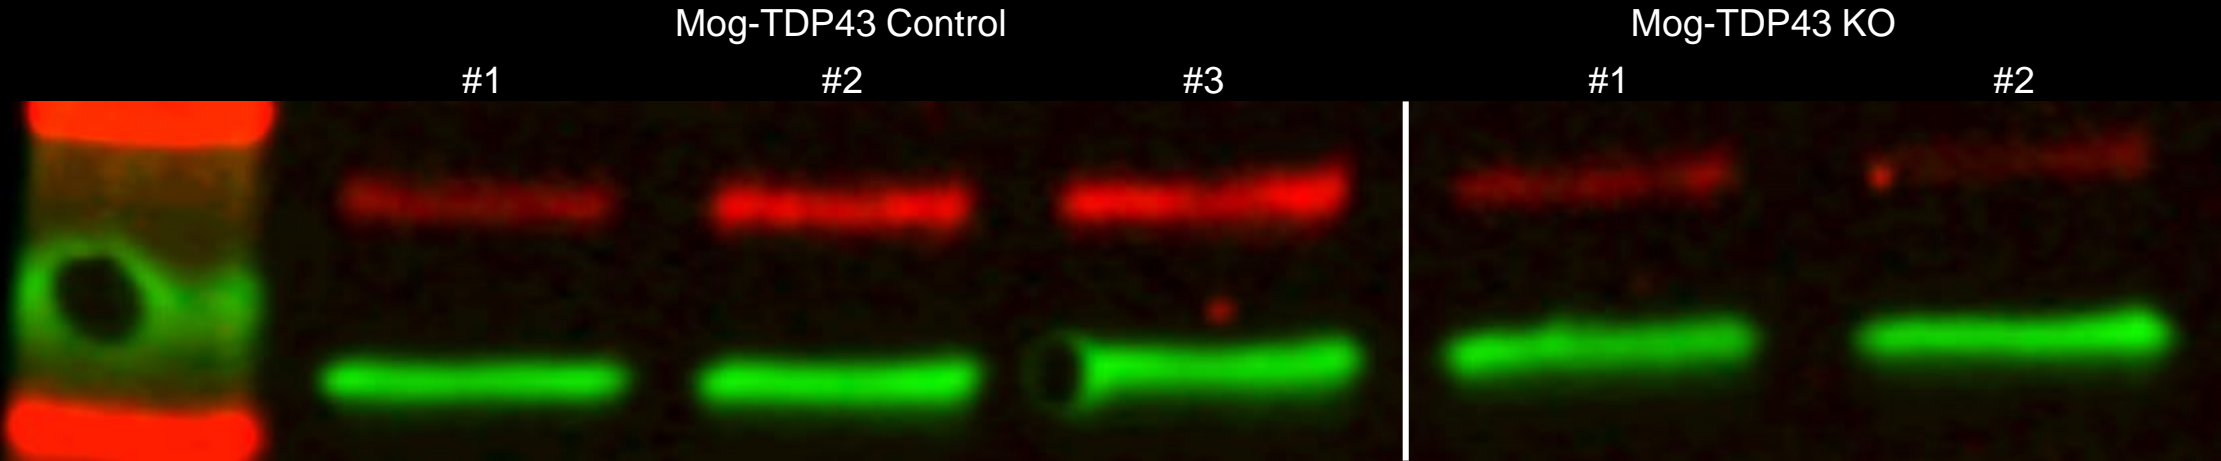

20210521 Ermin-red GAPDH-green

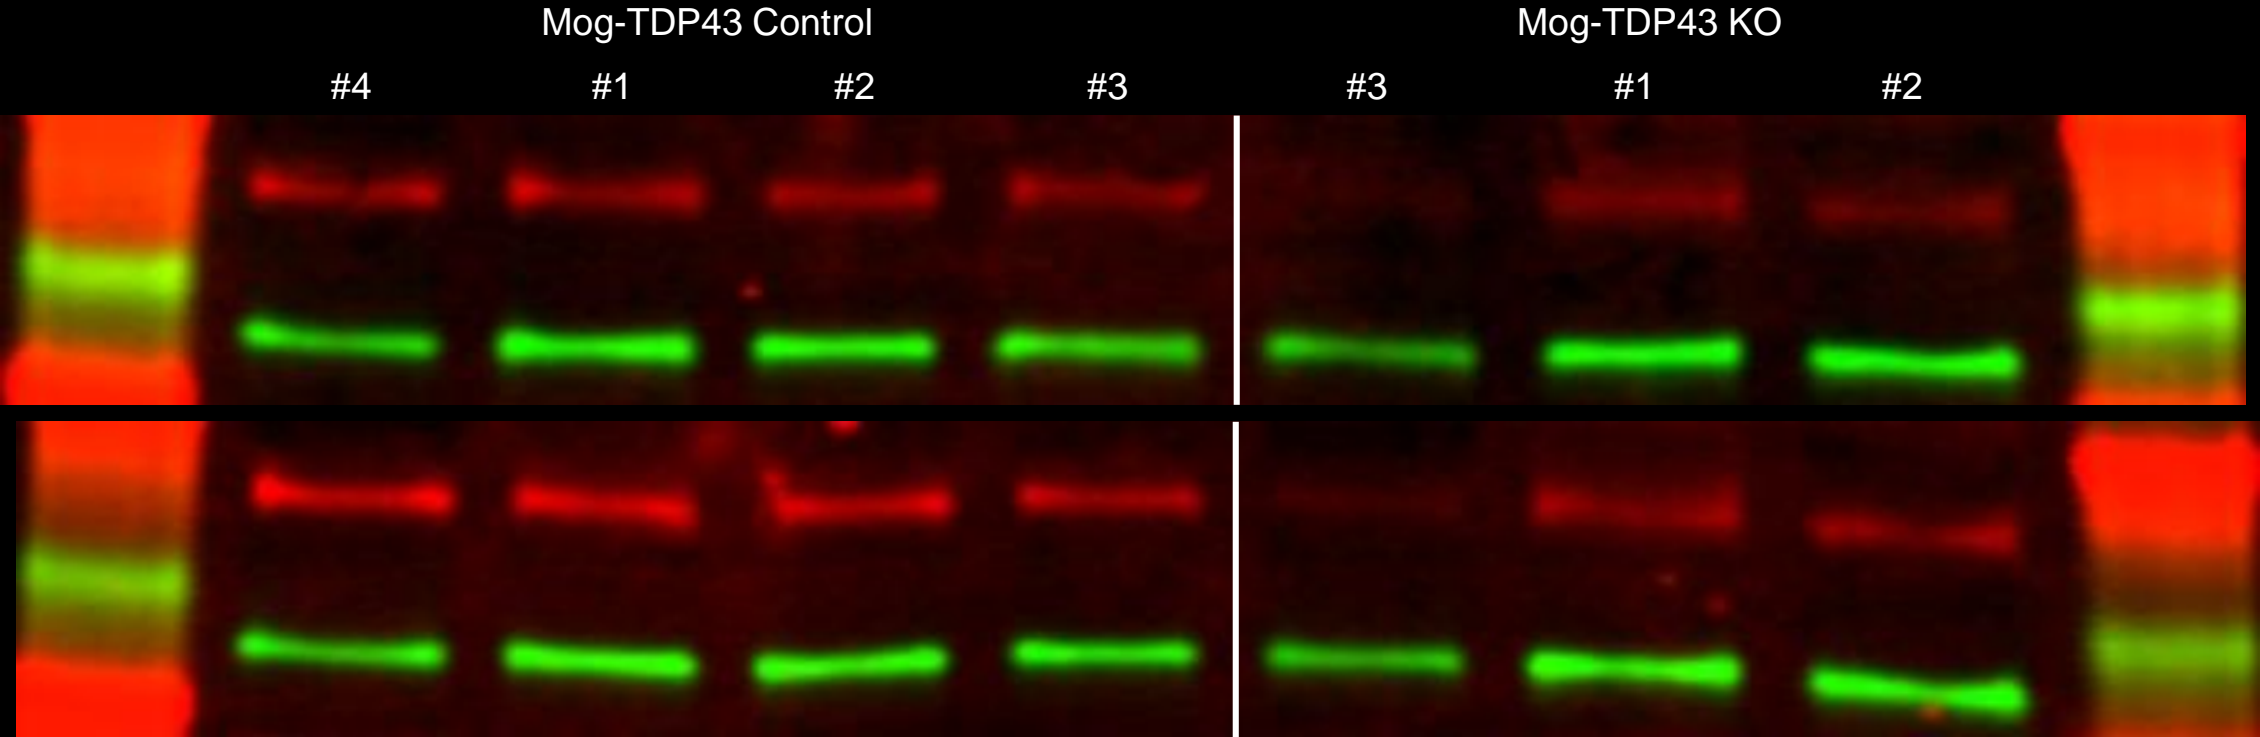

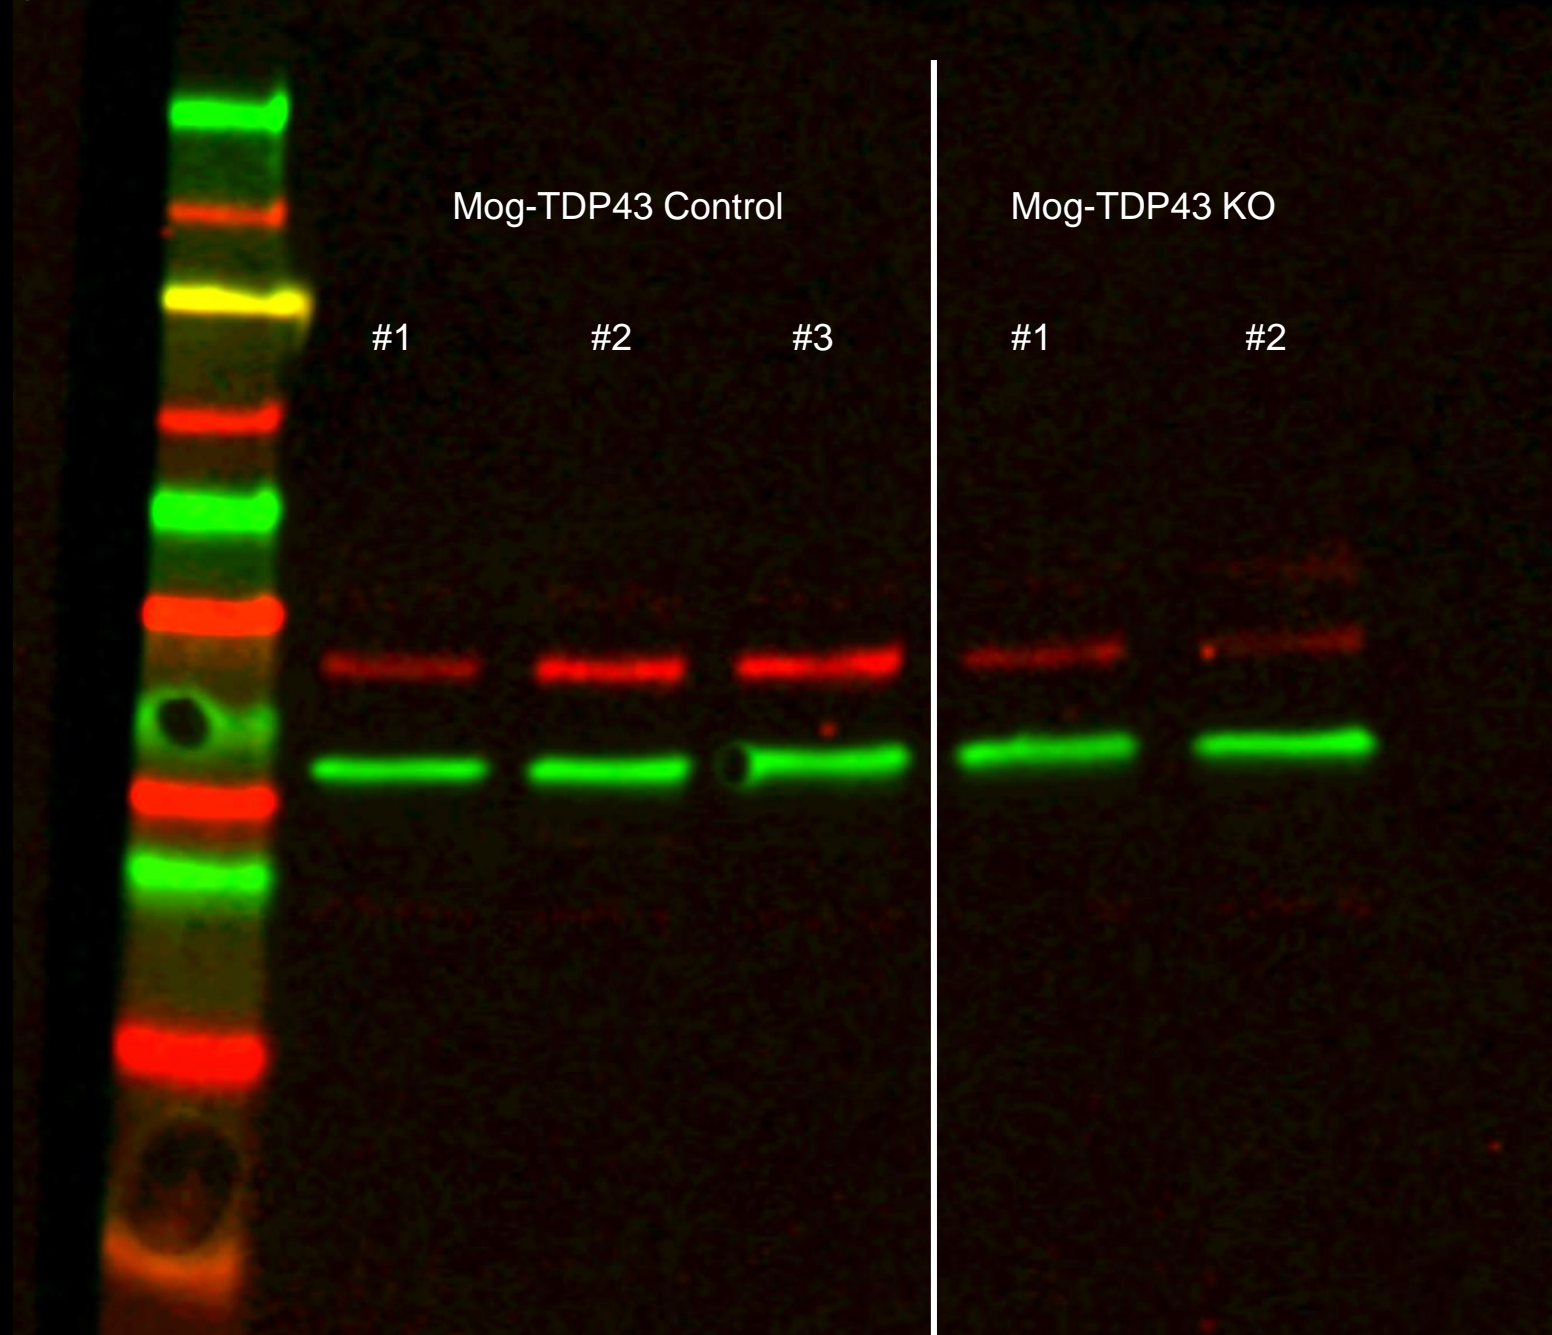

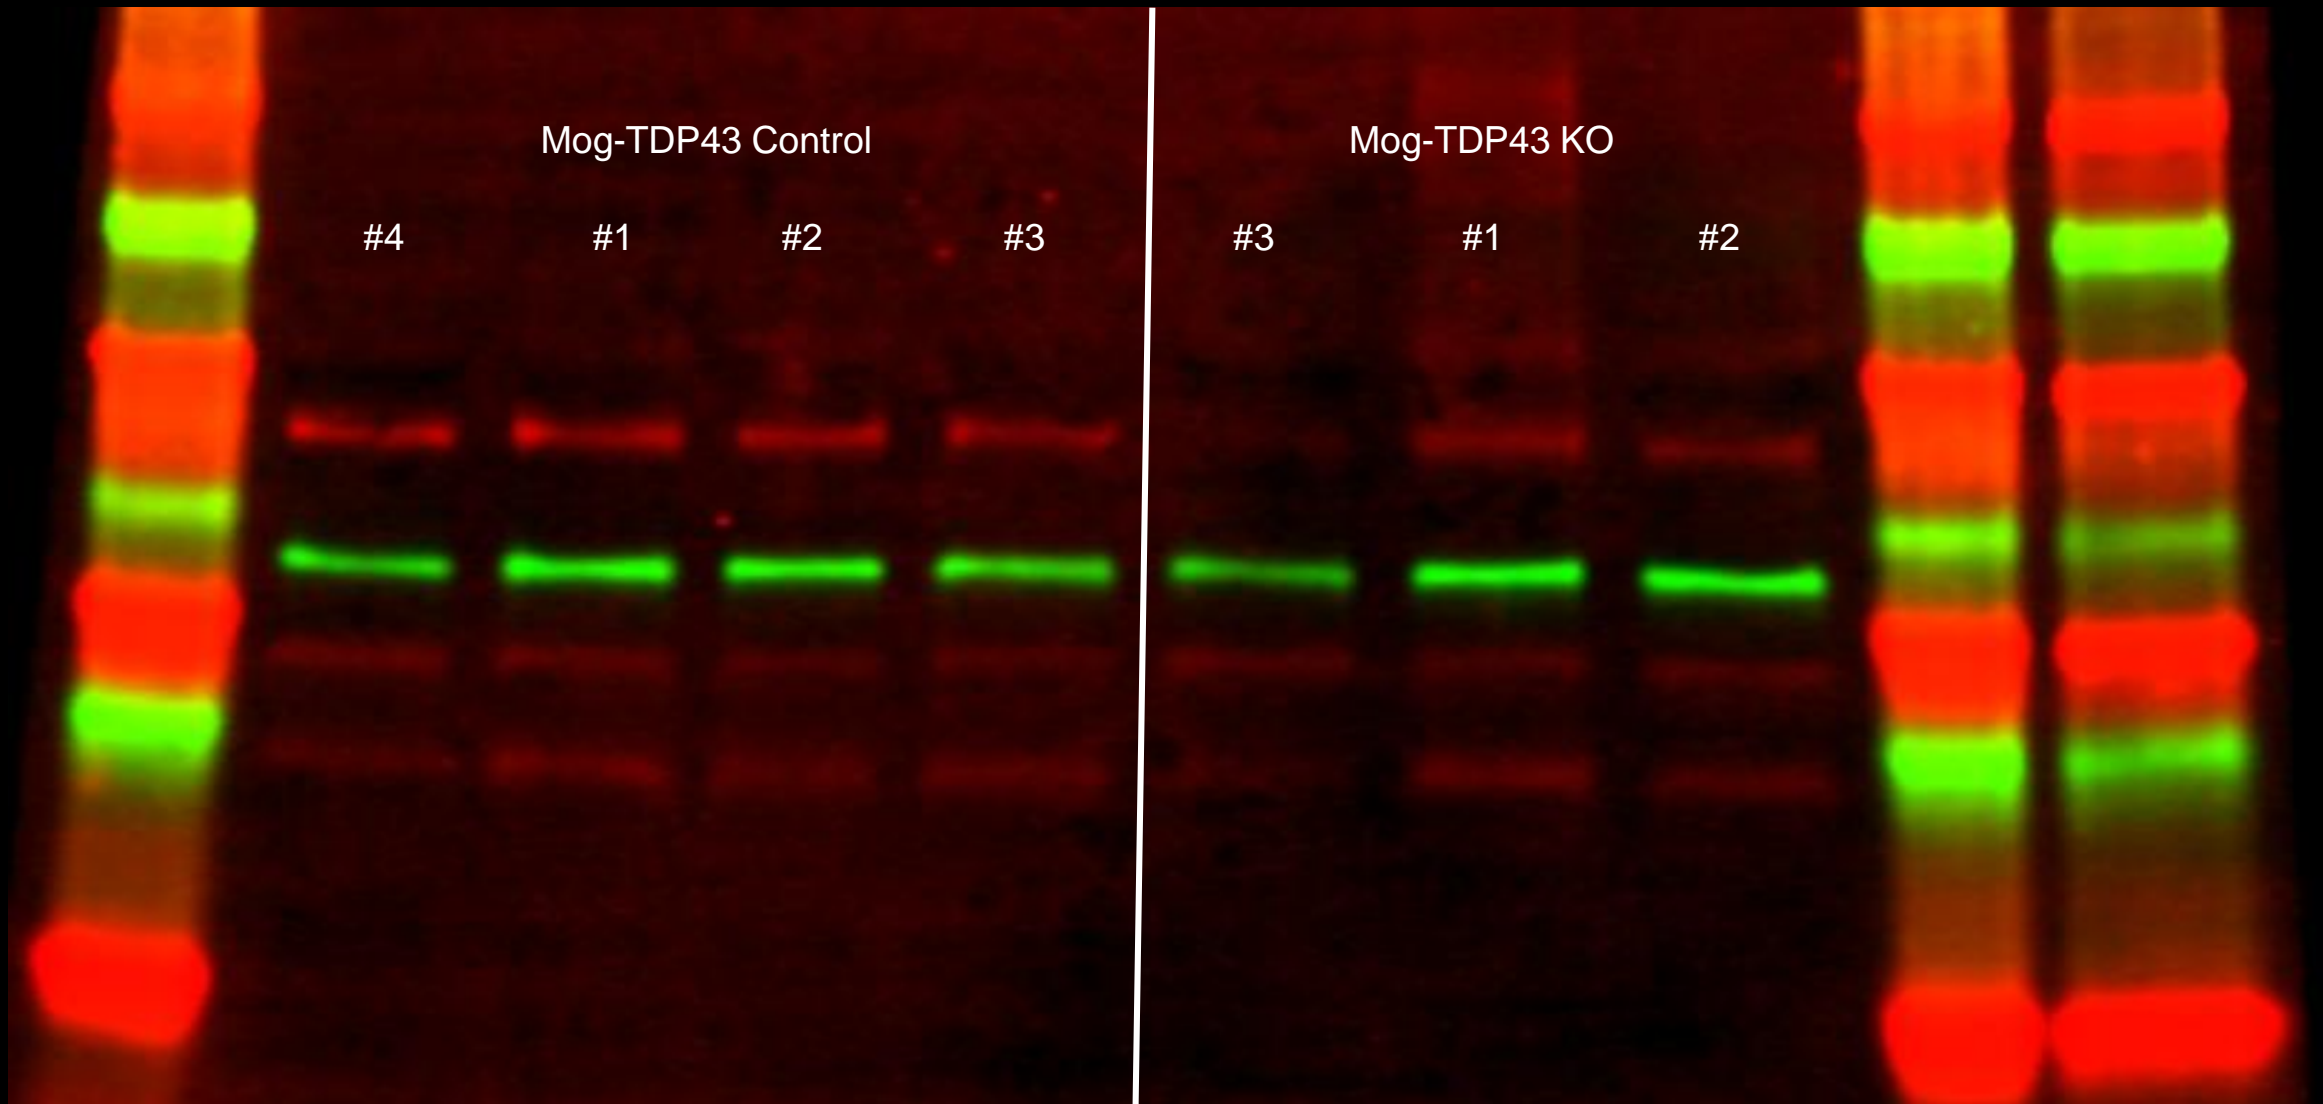

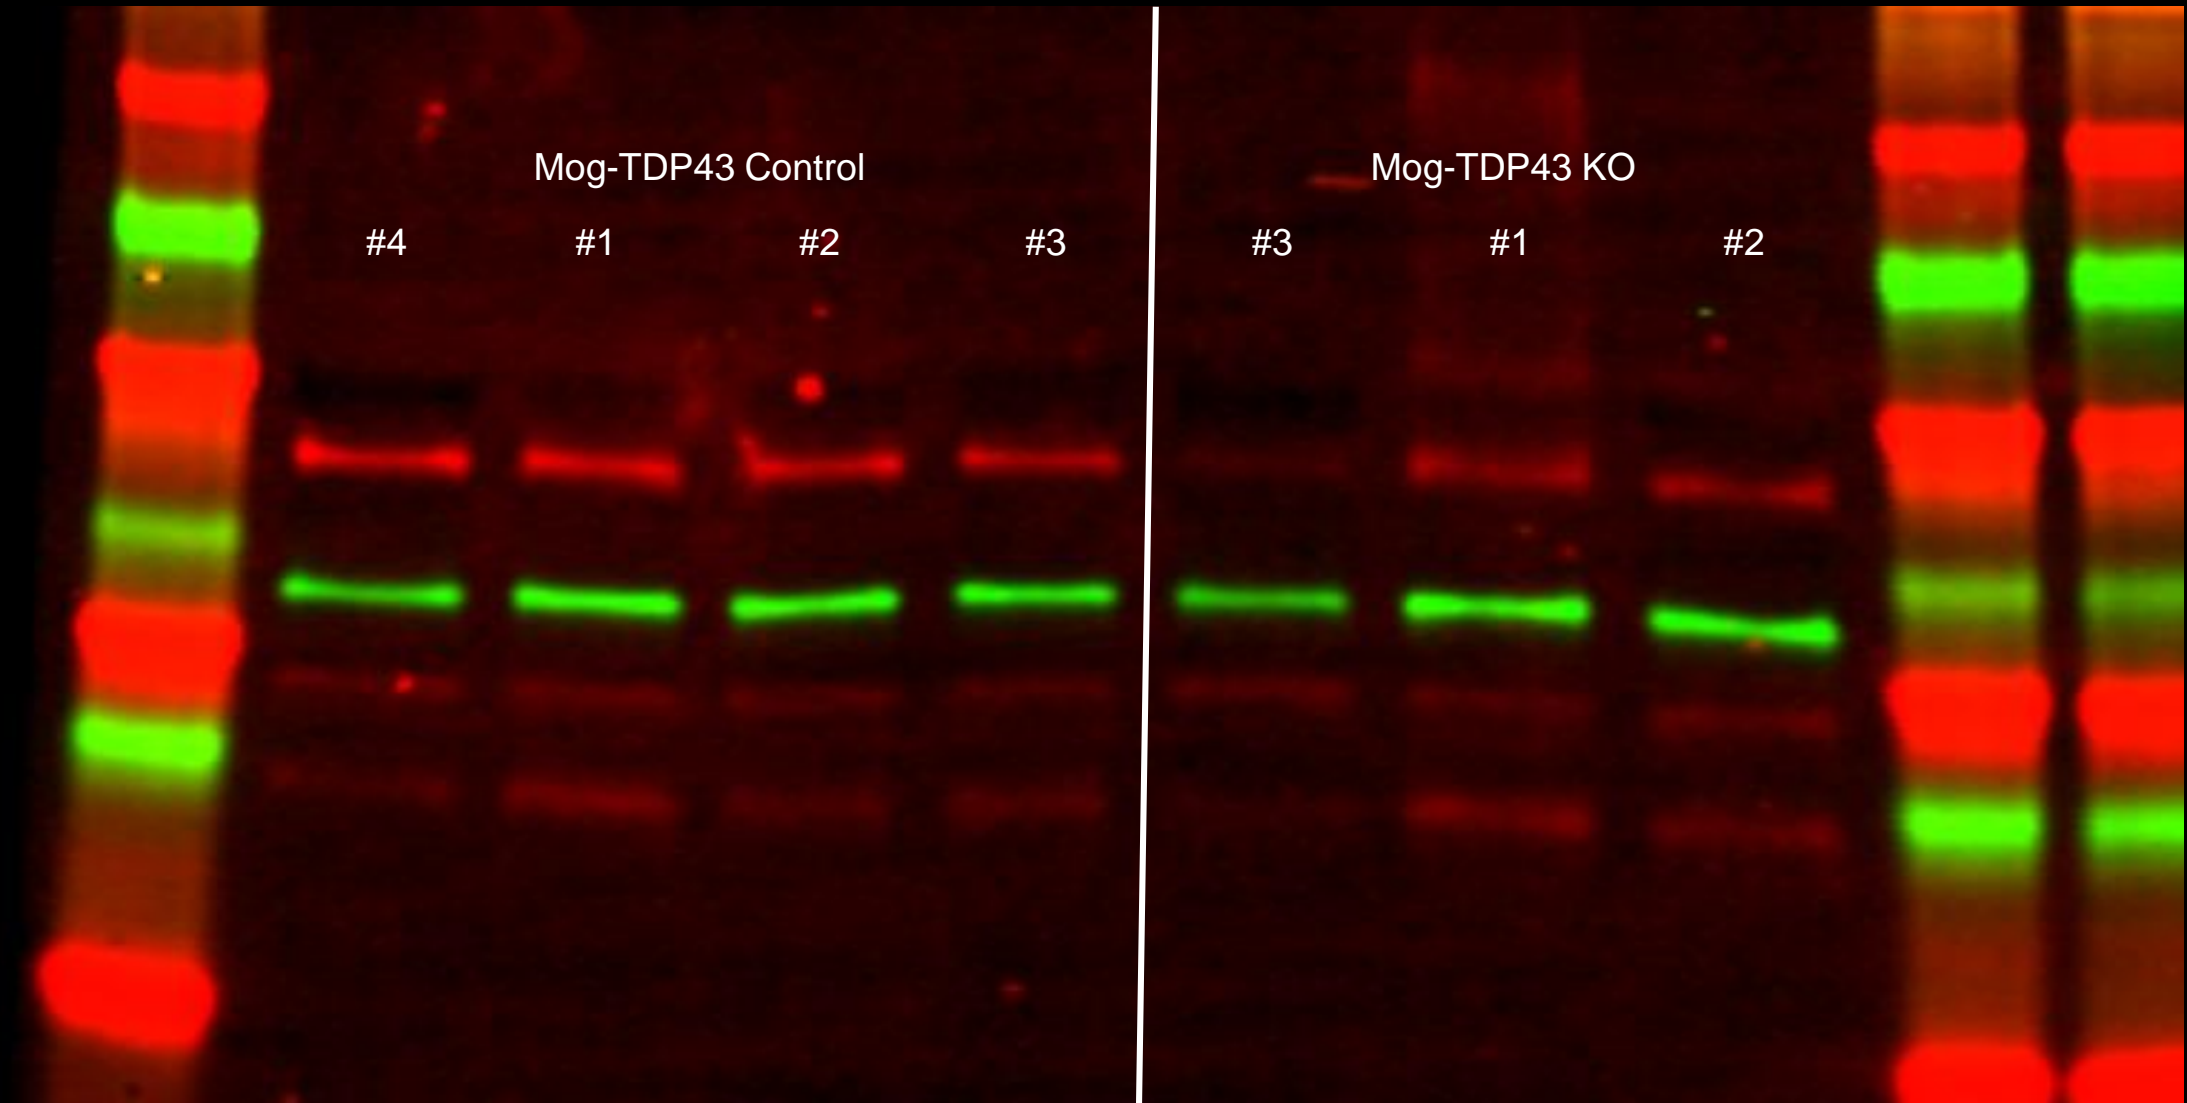

Supplement: fig6-data1 [file elife-75230-fig6-data1-v2.zip]
